# Supplementary material for: Aggregation enhancement of coronene molecules by seeding with alkali-metal ions
Source: Royal Society of Chemistry journal article supplement (doi:10.1039/c9cp02658d), 2019-01-01
Supplement: c9cp02658d1.pdf [file c9cp02658d1.pdf]

## Supplementary Information

# Aggregation enhancement of coronene molecules by seeding with alkali-metal ions

M. Bartolomei,<sup>†</sup> F. Pirani,<sup>‡</sup> and J. M. C. Marques<sup>\*,¶</sup>

<sup>†</sup>*Instituto de Física Fundamental, Consejo Superior de Investigaciones Científicas  
(IFF-CSIC), Serrano 123, 28006 Madrid, Spain.*

<sup>‡</sup>*Dipartimento di Chimica, Biologia e Biotecnologie, Università di Perugia, 06123 Perugia,  
Italy.*

<sup>¶</sup>*CQC, Department of Chemistry, University of Coimbra, 3004-535 Coimbra, Portugal.*

E-mail: qtmarque@ci.uc.pt

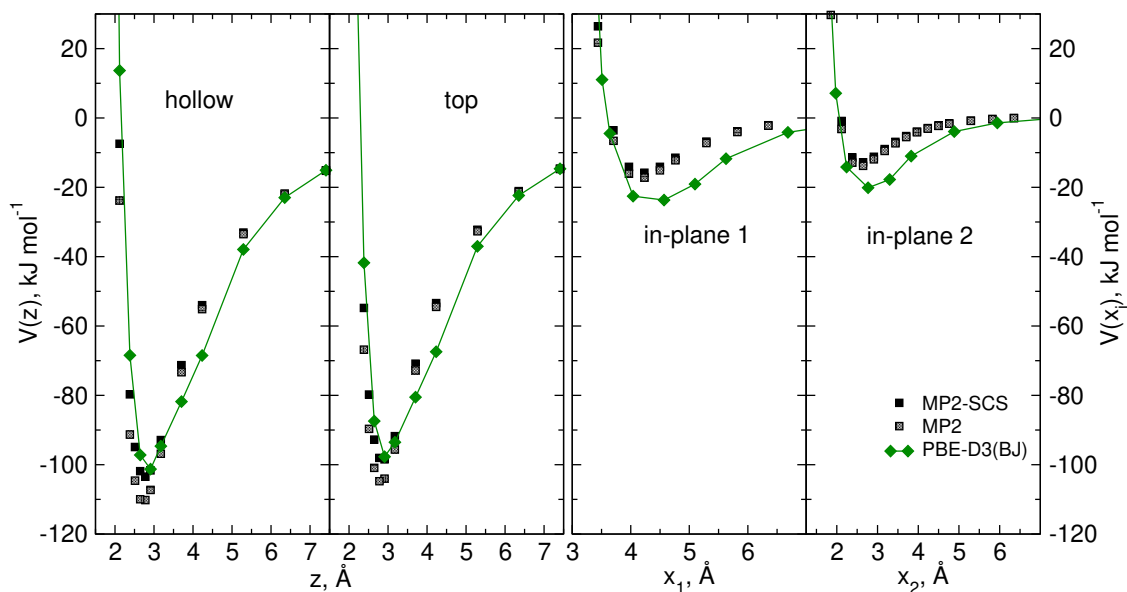

Figure S1: Comparison between PBE-D3(BJ) interaction energies for four different configurations of the coronene- $K^+$  (see Fig. 2 of the main manuscript) with those obtained at the MP2 and MP2-SCS levels.

## Cartesian coordinates and energies of the $K^+Cor_n$ clusters

All coordinates are in Å, while the energies are in  $\text{kJ mol}^{-1}$ .

### Structures in Fig. 3

37

$n = 1$ , Energy = -110.18040312

|   |             |            |            |
|---|-------------|------------|------------|
| C | 1.08059021  | 2.46690135 | 2.31601581 |
| C | 2.48364498  | 0.01524169 | 2.60995759 |
| C | 0.62177193  | 1.49286274 | 3.24183148 |
| C | 2.24093587  | 2.21511013 | 1.53717103 |
| C | 1.32329931  | 0.26703292 | 3.38880237 |
| C | 2.94246326  | 0.98928030 | 1.68414191 |
| C | 0.37906283  | 3.69273118 | 2.16904492 |
| C | -0.53857373 | 1.74465397 | 4.02067627 |

|   |             |             |             |
|---|-------------|-------------|-------------|
| C | 2.69975415  | 3.18914873  | 0.61135536  |
| C | 3.18517236  | -1.21058813 | 2.75692847  |
| C | 0.86448103  | -0.70700569 | 4.31461804  |
| C | 4.10280892  | 0.73748908  | 0.90529713  |
| C | -1.24010112 | 2.97048380  | 3.87370538  |
| C | 1.99822677  | 4.41497856  | 0.46438447  |
| C | 1.56600841  | -1.93283552 | 4.46158893  |
| C | 4.80433630  | -0.48834075 | 1.05226802  |
| C | -0.78128287 | 3.94452245  | 2.94788970  |
| C | 0.83788108  | 4.66676983  | 1.24322925  |
| C | 2.72635411  | -2.18462679 | 3.68274415  |
| C | 4.34551805  | -1.46237941 | 1.97808370  |
| C | -0.99739186 | 0.77061543  | 4.94649177  |
| C | 3.86009966  | 2.93735744  | -0.16748926 |
| C | -0.29586448 | -0.45521439 | 5.09346266  |
| C | 4.56162704  | 1.71152761  | -0.02051838 |
| H | -1.31977921 | 4.88547629  | 2.83507403  |
| H | 0.29938473  | 5.60772367  | 1.13041357  |
| H | 3.26485045  | -3.12558063 | 3.79555983  |
| H | 4.88401440  | -2.40333325 | 2.09089937  |
| H | -1.88807981 | 0.96389180  | 5.54433748  |
| H | -0.64805602 | -1.20289197 | 5.80412406  |
| H | 4.21229120  | 3.68503502  | -0.87815066 |
| H | 5.45231499  | 1.51825125  | -0.61836408 |
| H | -2.13078894 | 3.16376028  | 4.47155092  |
| H | 1.21381706  | -2.68051307 | 5.17225017  |
| H | 2.35041813  | 5.16265612  | -0.24627677 |

|   |            |             |            |
|---|------------|-------------|------------|
| H | 5.69502412 | -0.68161724 | 0.45442248 |
| K | 0.20465800 | 0.10074000  | 0.48149700 |

73

n = 2, Energy = -245.07791029

|   |             |             |             |
|---|-------------|-------------|-------------|
| C | -1.46303484 | 2.61923083  | 0.27998396  |
| C | -0.33810878 | 1.71903590  | -2.16742078 |
| C | -2.18872734 | 1.72191644  | -0.54742002 |
| C | -0.17487930 | 3.06644776  | -0.11631443 |
| C | -1.62626432 | 1.27181897  | -1.77112239 |
| C | 0.38758373  | 2.61635029  | -1.34001680 |
| C | -2.02549787 | 3.06932830  | 1.50368633  |
| C | -3.47688288 | 1.27469951  | -0.15112163 |
| C | 0.55081320  | 3.96376215  | 0.71108955  |
| C | 0.22435425  | 1.26893843  | -3.39112315 |
| C | -2.35195682 | 0.37450458  | -2.59852636 |
| C | 1.67573926  | 3.06356721  | -1.73631519 |
| C | -4.03934591 | 1.72479698  | 1.07258074  |
| C | -0.01164983 | 4.41385962  | 1.93479192  |
| C | -1.78949379 | -0.07559289 | -3.82222873 |
| C | 2.23820229  | 2.61346975  | -2.96001756 |
| C | -3.31365343 | 2.62211139  | 1.89998477  |
| C | -1.29980539 | 3.96664271  | 2.33109036  |
| C | -0.50133823 | 0.37162402  | -4.21852718 |
| C | 1.51250981  | 1.71615534  | -3.78742159 |
| C | -4.20257519 | 0.37738525  | -0.97852556 |
| C | 1.83896854  | 4.41097894  | 0.31479112  |
| C | -3.64011216 | -0.07271222 | -2.20222793 |

|   |             |             |             |
|---|-------------|-------------|-------------|
| C | 2.40143157  | 3.96088148  | -0.90891125 |
| H | -3.74540320 | 2.96760873  | 2.83930556  |
| H | -1.73155516 | 4.31214004  | 3.27041115  |
| H | -0.06958846 | 0.02612668  | -5.15784796 |
| H | 1.94425958  | 1.37065800  | -4.72674237 |
| H | -5.19137073 | 0.03409898  | -0.67432467 |
| H | -4.19715788 | -0.76149586 | -2.83734793 |
| H | 2.39601426  | 5.09976259  | 0.94991112  |
| H | 3.39022711  | 4.30416775  | -1.21311214 |
| H | -5.02814128 | 1.38151086  | 1.37678173  |
| H | -2.34653929 | -0.76437642 | -4.45734874 |
| H | 0.54539568  | 5.10264315  | 2.56991193  |
| H | 3.22699766  | 2.95675587  | -3.26421854 |
| C | 1.39710721  | -2.33818014 | -1.11850071 |
| C | 1.71671108  | -2.22111882 | 1.70102931  |
| C | 2.53912081  | -1.70635988 | -0.55902938 |
| C | 0.41489554  | -2.91146974 | -0.26820702 |
| C | 2.69892275  | -1.64782921 | 0.85073563  |
| C | 0.57469748  | -2.85293908 | 1.14155799  |
| C | 1.23730527  | -2.39671080 | -2.52826571 |
| C | 3.52133248  | -1.13307027 | -1.40932307 |
| C | -0.72711806 | -3.54329000 | -0.82767835 |
| C | 1.87651301  | -2.16258815 | 3.11079432  |
| C | 3.84093635  | -1.01600895 | 1.41020695  |
| C | -0.40751419 | -3.42622868 | 1.99185167  |
| C | 3.36153054  | -1.19160094 | -2.81908807 |
| C | -0.88692000 | -3.60182067 | -2.23744335 |

|   |             |             |             |
|---|-------------|-------------|-------------|
| C | 4.00073828  | -0.95747829 | 2.81997196  |
| C | -0.24771226 | -3.36769802 | 3.40161668  |
| C | 2.21951693  | -1.82342120 | -3.37855946 |
| C | 0.09529166  | -3.02853107 | -3.08773710 |
| C | 3.01852662  | -1.53076789 | 3.67026571  |
| C | 0.89430135  | -2.73587775 | 3.96108807  |
| C | 4.66334587  | -0.50125013 | -0.84985171 |
| C | -1.70932952 | -4.11657949 | 0.02261531  |
| C | 4.82314781  | -0.44271947 | 0.55991330  |
| C | -1.54952759 | -4.05804883 | 1.43238032  |
| H | 2.09685207  | -1.86834967 | -4.46070297 |
| H | -0.02737320 | -3.07345953 | -4.16988061 |
| H | 3.14119148  | -1.48583942 | 4.75240922  |
| H | 1.01696621  | -2.69094929 | 5.04323158  |
| H | 5.41729716  | -0.06118975 | -1.50254198 |
| H | 5.69976397  | 0.04226938  | 0.98936666  |
| H | -2.58594568 | -4.60156833 | -0.40683805 |
| H | -2.30347888 | -4.49810920 | 2.08507059  |
| H | 4.11548162  | -0.75154068 | -3.47177837 |
| H | 4.87735424  | -0.47248956 | 3.24942541  |
| H | -1.76353596 | -4.08680940 | -2.66689680 |
| H | -1.00166333 | -3.80775827 | 4.05430698  |
| K | 0.20465800  | 0.10074000  | 0.48149700  |

109

n = 3, Energy = -354.65575528

|   |            |             |             |
|---|------------|-------------|-------------|
| C | 3.46280898 | -0.17306985 | -0.05125487 |
| C | 4.48767612 | -1.30775666 | 2.34201334  |

|   |            |             |             |
|---|------------|-------------|-------------|
| C | 3.41361521 | 0.56369943  | 1.16165530  |
| C | 4.02443632 | -1.47718254 | -0.06753093 |
| C | 3.92604879 | -0.00364397 | 2.35828940  |
| C | 4.53686989 | -2.04452594 | 1.12910317  |
| C | 2.95037541 | 0.39427355  | -1.24788897 |
| C | 2.85198787 | 1.86781212  | 1.17793136  |
| C | 4.07363009 | -2.21395183 | -1.28044109 |
| C | 5.00010970 | -1.87510006 | 3.53864744  |
| C | 3.87685502 | 0.73312531  | 3.57119957  |
| C | 5.09849723 | -3.34863863 | 1.11282711  |
| C | 2.33955430 | 2.43515552  | -0.01870274 |
| C | 3.56119652 | -1.64660843 | -2.47707520 |
| C | 4.38928859 | 0.16578191  | 4.76783367  |
| C | 5.61093080 | -3.91598203 | 2.30946122  |
| C | 2.38874805 | 1.69838626  | -1.23161296 |
| C | 2.99956915 | -0.34249572 | -2.46079919 |
| C | 4.95091595 | -1.13833080 | 4.75155766  |
| C | 5.56173706 | -3.17921277 | 3.52237143  |
| C | 2.80279417 | 2.60458120  | 2.39084141  |
| C | 4.63525737 | -3.51806431 | -1.29671704 |
| C | 3.31522774 | 2.03723780  | 3.58747551  |
| C | 5.14769094 | -4.08540772 | -0.10008293 |
| H | 1.99540117 | 2.13388223  | -2.15015599 |
| H | 2.60622228 | 0.09300025  | -3.37934222 |
| H | 5.34426283 | -1.57382677 | 5.67010070  |
| H | 5.95508393 | -3.61470874 | 4.44091447  |
| H | 2.37168582 | 3.60562554  | 2.40333502  |

|   |             |             |             |
|---|-------------|-------------|-------------|
| H | 3.27746631  | 2.60278612  | 4.51851226  |
| H | 4.67301879  | -4.08361264 | -2.22775379 |
| H | 5.57879928  | -5.08645205 | -0.11257655 |
| H | 1.90844599  | 3.43619968  | -0.00620930 |
| H | 4.35152725  | 0.73133001  | 5.69887036  |
| H | 3.59895786  | -2.21215652 | -3.40811188 |
| H | 6.04203911  | -4.91702619 | 2.29696777  |
| C | -0.71091506 | 2.59365311  | -2.73240129 |
| C | -0.80929158 | 4.06720467  | -0.30658857 |
| C | -1.42436625 | 2.07921869  | -1.61761669 |
| C | -0.04665213 | 3.84486330  | -2.63427953 |
| C | -1.47355451 | 2.81599447  | -0.40471033 |
| C | -0.09584039 | 4.58163908  | -1.42137317 |
| C | -0.66172680 | 1.85687732  | -3.94530766 |
| C | -2.08862918 | 0.82800849  | -1.71573845 |
| C | 0.66679906  | 4.35929772  | -3.74906413 |
| C | -0.85847985 | 4.80398045  | 0.90631779  |
| C | -2.18700570 | 2.30156005  | 0.71007427  |
| C | 0.56842253  | 5.83284928  | -1.32325141 |
| C | -2.03944092 | 0.09123271  | -2.92864481 |
| C | 0.71598732  | 3.62252194  | -4.96197050 |
| C | -2.23619397 | 3.03833584  | 1.92298063  |
| C | 0.51923427  | 6.56962506  | -0.11034505 |
| C | -1.32598973 | 0.60566710  | -4.04342947 |
| C | 0.05172439  | 2.37131171  | -5.06009231 |
| C | -1.57193104 | 4.28954606  | 2.02110244  |
| C | -0.19421692 | 6.05519068  | 1.00443960  |



|   |             |             |             |
|---|-------------|-------------|-------------|
| C | -2.80208024 | 0.31357425  | -0.60095395 |
| C | 1.33106185  | 5.61050775  | -3.65094228 |
| C | -2.85126850 | 1.05035003  | 0.61195241  |
| C | 1.28187359  | 6.34728353  | -2.43803591 |
| H | -1.28823254 | 0.04011388  | -4.97446318 |
| H | 0.08948158  | 1.80575850  | -5.99112602 |
| H | -1.60968822 | 4.85509928  | 2.95213615  |
| H | -0.23197410 | 6.62074389  | 1.93547331  |
| H | -3.31197226 | -0.64686184 | -0.67627275 |
| H | -3.39891771 | 0.65546722  | 1.46766742  |
| H | 1.87871106  | 6.00539055  | -4.50665728 |
| H | 1.79176561  | 7.30771961  | -2.36271711 |
| H | -2.54933280 | -0.86920323 | -3.00396377 |
| H | -2.78384304 | 2.64345323  | 2.77869559  |
| H | 1.26363639  | 4.01740454  | -5.81768546 |
| H | 1.02912616  | 7.53006100  | -0.03502610 |
| C | -2.55197481 | -3.02457162 | 0.60568493  |
| C | -2.65036470 | -1.55102576 | 3.03150057  |
| C | -1.35068436 | -2.70908626 | 1.29399468  |
| C | -3.80246020 | -2.60328405 | 1.13028300  |
| C | -1.39987930 | -1.97231333 | 2.50690250  |
| C | -3.85165515 | -1.86651112 | 2.34319083  |
| C | -2.50277986 | -3.76134455 | -0.60722289 |
| C | -0.10019896 | -3.13037382 | 0.76939661  |
| C | -5.00375066 | -2.91876942 | 0.44197325  |
| C | -2.69955964 | -0.81425283 | 4.24440840  |
| C | -0.19858885 | -1.65682796 | 3.19521225  |

|   |             |             |             |
|---|-------------|-------------|-------------|
| C | -5.10214055 | -1.44522356 | 2.86778890  |
| C | -0.05100402 | -3.86714675 | -0.44351122 |
| C | -4.95455571 | -3.65554235 | -0.77093457 |
| C | -0.24778379 | -0.92005503 | 4.40812007  |
| C | -5.15133549 | -0.70845063 | 4.08069672  |
| C | -1.25229447 | -4.18263215 | -1.13182102 |
| C | -3.70407031 | -4.07682995 | -1.29553269 |
| C | -1.49826919 | -0.49876744 | 4.93271820  |
| C | -3.95004504 | -0.39296523 | 4.76900652  |
| C | 1.10109125  | -2.81488845 | 1.45770634  |
| C | -6.25423582 | -2.49748186 | 0.96657134  |
| C | 1.05189631  | -2.07811552 | 2.67061416  |
| C | -6.30343076 | -1.76070893 | 2.17947916  |
| H | -1.21453215 | -4.74818317 | -2.06285585 |
| H | -3.66630800 | -4.64238097 | -2.22656753 |
| H | -1.53603151 | 0.06678359  | 5.86375303  |
| H | -3.98780735 | 0.17258579  | 5.70004135  |
| H | 2.06097099  | -3.13827118 | 1.05502188  |
| H | 1.97401372  | -1.83594716 | 3.19896464  |
| H | -7.17635323 | -2.73965022 | 0.43822087  |
| H | -7.26331049 | -1.43732620 | 2.58216362  |
| H | 0.90887548  | -4.19052950 | -0.84619574 |
| H | 0.67433338  | -0.67788663 | 4.93647059  |
| H | -5.87667289 | -3.89771075 | -1.29928508 |
| H | -6.11121499 | -0.38506788 | 4.48338125  |
| K | 0.20465800  | 0.10074000  | 0.48149700  |

n = 4, Energy = -455.75380290

|   |             |            |             |
|---|-------------|------------|-------------|
| C | 2.59074857  | 3.22586637 | -2.00157732 |
| C | -0.06438091 | 2.22725820 | -1.86494385 |
| C | 2.06749204  | 2.45161724 | -3.07075502 |
| C | 1.78644036  | 3.50081142 | -0.86408287 |
| C | 0.73992730  | 1.95231316 | -3.00243829 |
| C | 0.45887562  | 3.00150733 | -0.79576614 |
| C | 3.91831330  | 3.72517046 | -2.06989405 |
| C | 2.87180025  | 2.17667220 | -4.20824946 |
| C | 2.30969688  | 4.27506055 | 0.20509483  |
| C | -1.39194565 | 1.72795412 | -1.79662711 |
| C | 0.21667077  | 1.17806403 | -4.07161599 |
| C | -0.34543259 | 3.27645237 | 0.34172830  |
| C | 4.19936498  | 2.67597629 | -4.27656620 |
| C | 3.63726162  | 4.77436463 | 0.13677810  |
| C | -1.11089397 | 0.67875994 | -4.00329926 |
| C | -1.67299733 | 2.77714829 | 0.41004504  |
| C | 4.72262157  | 3.45022544 | -3.20738850 |
| C | 4.44156989  | 4.49941961 | -1.00071635 |
| C | -1.91520223 | 0.95370497 | -2.86580481 |
| C | -2.19625391 | 2.00289914 | -0.65913267 |
| C | 2.34854369  | 1.40242317 | -5.27742696 |
| C | 1.50538870  | 4.55000549 | 1.34258906  |
| C | 1.02097895  | 0.90311909 | -5.20911022 |
| C | 0.17782397  | 4.05070140 | 1.41090580  |
| H | 5.74166769  | 3.83349405 | -3.25982880 |
| H | 5.46061601  | 4.88268822 | -1.05315666 |

|   |             |             |             |
|---|-------------|-------------|-------------|
| H | -2.93424835 | 0.57043635  | -2.81336451 |
| H | -3.21530003 | 1.61963053  | -0.60669236 |
| H | 2.96593525  | 1.19137378  | -6.15057419 |
| H | 0.61932427  | 0.30880104  | -6.02981714 |
| H | 1.90704338  | 5.14432353  | 2.16329598  |
| H | -0.43956759 | 4.26175079  | 2.28405302  |
| H | 4.81675657  | 2.46492702  | -5.14971322 |
| H | -1.51254873 | 0.08444198  | -4.82400596 |
| H | 4.03891638  | 5.36868260  | 0.95748480  |
| H | -2.29038891 | 2.98819756  | 1.28319206  |
| C | -3.12327158 | 0.74873826  | 2.83215038  |
| C | -3.54173478 | -1.15173181 | 0.76364813  |
| C | -2.18619011 | -0.29889346 | 2.63029357  |
| C | -4.26958465 | 0.84613494  | 1.99975606  |
| C | -2.39542171 | -1.24912849 | 1.59604244  |
| C | -4.47881626 | -0.10410009 | 0.96550494  |
| C | -2.91403998 | 1.69897330  | 3.86640151  |
| C | -1.03987704 | -0.39629014 | 3.46268789  |
| C | -5.20666613 | 1.89376666  | 2.20161287  |
| C | -3.75096638 | -2.10196684 | -0.27060300 |
| C | -1.45834024 | -2.29676021 | 1.39418564  |
| C | -5.62512933 | -0.00670341 | 0.13311062  |
| C | -0.83064543 | 0.55394489  | 4.49693902  |
| C | -4.99743453 | 2.84400170  | 3.23586400  |
| C | -1.66757184 | -3.24699525 | 0.35993451  |
| C | -5.83436093 | -0.95693844 | -0.90114051 |
| C | -1.76772690 | 1.60157665  | 4.69879587  |

|   |             |             |             |
|---|-------------|-------------|-------------|
| C | -3.85112144 | 2.74660506  | 4.06825836  |
| C | -2.81388492 | -3.14959860 | -0.47245985 |
| C | -4.89727947 | -2.00457020 | -1.10299736 |
| C | -0.10279576 | -1.44392175 | 3.26083102  |
| C | -6.35297900 | 1.99116324  | 1.36921861  |
| C | -0.31202737 | -2.39415679 | 2.22657989  |
| C | -6.56221060 | 1.04092820  | 0.33496749  |
| H | -1.60711955 | 2.33098238  | 5.49269282  |
| H | -3.69051410 | 3.47601079  | 4.86215531  |
| H | -2.97449227 | -3.87900434 | -1.26635681 |
| H | -5.05788681 | -2.73397593 | -1.89689431 |
| H | 0.77712069  | -1.51868402 | 3.89978164  |
| H | 0.40728173  | -3.19832486 | 2.07163347  |
| H | -7.07228809 | 2.79533131  | 1.52416504  |
| H | -7.44212706 | 1.11569047  | -0.30398313 |
| H | 0.04927083  | 0.47918278  | 5.13588961  |
| H | -0.94826295 | -4.05116325 | 0.20498798  |
| H | -5.71674341 | 3.64816971  | 3.39081053  |
| H | -6.71427720 | -0.88217633 | -1.54009111 |
| C | 2.33973970  | -3.61356208 | -0.05676081 |
| C | 3.21215858  | -2.93844308 | 2.56024113  |
| C | 2.38355100  | -4.60821941 | 0.95572990  |
| C | 2.73213784  | -2.28134524 | 0.23924946  |
| C | 2.81976044  | -4.27065991 | 2.26423087  |
| C | 3.16834728  | -1.94378574 | 1.54775043  |
| C | 1.90353026  | -3.95112158 | -1.36526178 |
| C | 1.99115286  | -5.94043625 | 0.65971963  |

|   |            |             |             |
|---|------------|-------------|-------------|
| C | 2.68832653 | -1.28668790 | -0.77324125 |
| C | 3.64836802 | -2.60088358 | 3.86874210  |
| C | 2.86357174 | -5.26531725 | 3.27672157  |
| C | 3.56074541 | -0.61156890 | 1.84376069  |
| C | 1.55494342 | -6.27799575 | -0.64878134 |
| C | 2.25211709 | -1.62424740 | -2.08174222 |
| C | 3.29978118 | -4.92775775 | 4.58522254  |
| C | 3.99695486 | -0.27400940 | 3.15226166  |
| C | 1.51113210 | -5.28333843 | -1.66127210 |
| C | 1.85971894 | -2.95646425 | -2.37775254 |
| C | 3.69217933 | -3.59554090 | 4.88123286  |
| C | 4.04076617 | -1.26866673 | 4.16475242  |
| C | 2.03496419 | -6.93509336 | 1.67221027  |
| C | 3.08072464 | 0.04552871  | -0.47723092 |
| C | 2.47117363 | -6.59753386 | 2.98071124  |
| C | 3.51693408 | 0.38308821  | 0.83127005  |
| H | 1.17629529 | -5.54245099 | -2.66568476 |
| H | 1.52488213 | -3.21557681 | -3.38216520 |
| H | 4.02701614 | -3.33642834 | 5.88564553  |
| H | 4.37560298 | -1.00955417 | 5.16916509  |
| H | 1.73375714 | -7.95771061 | 1.44499112  |
| H | 2.50480343 | -7.36103852 | 3.75790487  |
| H | 3.04709484 | 0.80903337  | -1.25442454 |
| H | 3.81814113 | 1.40570546  | 1.05848920  |
| H | 1.25373639 | -7.30061279 | -0.87600061 |
| H | 3.33341103 | -5.69126217 | 5.36241615  |
| H | 2.21848725 | -0.86074298 | -2.85893583 |

|   |             |             |            |
|---|-------------|-------------|------------|
| H | 4.29816189  | 0.74860763  | 3.37948093 |
| C | -2.60792783 | -4.26473904 | 4.14753407 |
| C | -4.76989985 | -2.42492591 | 4.22855319 |
| C | -2.61878866 | -3.22406293 | 5.11359584 |
| C | -3.67805301 | -4.38550859 | 3.22198186 |
| C | -3.69977467 | -2.30415636 | 5.15410540 |
| C | -4.75903902 | -3.46560202 | 3.26249142 |
| C | -1.52694182 | -5.18464561 | 4.10702450 |
| C | -1.54866348 | -3.10329339 | 6.03914805 |
| C | -3.66719218 | -5.42618470 | 2.25592008 |
| C | -5.85088586 | -1.50501934 | 4.26906276 |
| C | -3.71063550 | -1.26348025 | 6.12016718 |
| C | -5.82916420 | -3.58637156 | 2.33693921 |
| C | -0.46767747 | -4.02319996 | 5.99863848 |
| C | -2.58620617 | -6.34609127 | 2.21541052 |
| C | -4.79162151 | -0.34357368 | 6.16067674 |
| C | -6.91015021 | -2.66646499 | 2.37744878 |
| C | -0.45681659 | -5.06387611 | 5.03257671 |
| C | -1.51608094 | -6.22532176 | 3.14096273 |
| C | -5.86174674 | -0.46434319 | 5.23512453 |
| C | -6.92101109 | -1.62578884 | 3.34351055 |
| C | -1.55952441 | -2.06261739 | 7.00520964 |
| C | -4.73731726 | -5.54695413 | 1.33036806 |
| C | -2.64051042 | -1.14271082 | 7.04571920 |
| C | -5.81830327 | -4.62704756 | 1.37087762 |
| H | 0.37295432  | -5.77000154 | 5.00148134 |
| H | -0.68631003 | -6.93144719 | 3.10986736 |

|   |             |             |            |
|---|-------------|-------------|------------|
| H | -6.69151765 | 0.24178224  | 5.26621990 |
| H | -7.75078200 | -0.91966341 | 3.37460592 |
| H | -0.73809023 | -1.96991399 | 7.71566880 |
| H | -2.64884724 | -0.34388191 | 7.78727374 |
| H | -4.72898044 | -6.34578304 | 0.58881352 |
| H | -6.63973745 | -4.71975096 | 0.66041846 |
| H | 0.35375666  | -3.93049671 | 6.70909746 |
| H | -4.79995848 | 0.45525515  | 6.90223109 |
| H | -2.57786920 | -7.14492010 | 1.47385617 |
| H | -7.73158434 | -2.75916825 | 1.66698980 |
| K | 0.20465800  | 0.10074000  | 0.48149700 |

181

n = 5, Energy = -556.71294827

|   |            |            |             |
|---|------------|------------|-------------|
| C | 4.69799884 | 4.53884889 | -1.92052988 |
| C | 4.84930333 | 4.69128206 | 0.91133710  |
| C | 5.40925368 | 3.54816292 | -1.19316618 |
| C | 4.06239624 | 5.60575144 | -1.23196008 |
| C | 5.48490593 | 3.62437951 | 0.22276731  |
| C | 4.13804849 | 5.68196802 | 0.18397341  |
| C | 4.62234660 | 4.46263230 | -3.33646337 |
| C | 6.04485628 | 2.48126037 | -1.88173598 |
| C | 3.35114140 | 6.59643740 | -1.95932377 |
| C | 4.92495558 | 4.76749864 | 2.32727059  |
| C | 6.19616077 | 2.63369354 | 0.95013100  |
| C | 3.50244589 | 6.74887057 | 0.87254321  |
| C | 5.96920404 | 2.40504379 | -3.29766947 |
| C | 3.27548916 | 6.52022081 | -3.37525726 |



|   |             |             |             |
|---|-------------|-------------|-------------|
| C | 6.27181302  | 2.70991013  | 2.36606449  |
| C | 3.57809814  | 6.82508716  | 2.28847670  |
| C | 5.25794919  | 3.39572975  | -4.02503322 |
| C | 3.91109175  | 5.45331826  | -4.06382712 |
| C | 5.63621042  | 3.77681268  | 3.05463435  |
| C | 4.28935298  | 5.83440119  | 3.01584045  |
| C | 6.75611099  | 1.49057461  | -1.15437229 |
| C | 2.71553893  | 7.66333975  | -1.27075398 |
| C | 6.83176324  | 1.56679119  | 0.26156120  |
| C | 2.79119118  | 7.73955634  | 0.14517951  |
| H | 5.19987810  | 3.33722547  | -5.11191169 |
| H | 3.85302066  | 5.39481398  | -5.15070559 |
| H | 5.69428151  | 3.83531696  | 4.14151282  |
| H | 4.34742407  | 5.89290547  | 4.10271892  |
| H | 7.24400318  | 0.67161412  | -1.68292237 |
| H | 7.37772652  | 0.80633498  | 0.81988971  |
| H | 2.16957565  | 8.42379596  | -1.82908248 |
| H | 2.30329899  | 8.55851683  | 0.67372960  |
| H | 6.45709609  | 1.58608349  | -3.82621962 |
| H | 6.81777617  | 1.94945412  | 2.92439305  |
| H | 2.72952600  | 7.28067682  | -3.93358582 |
| H | 3.09020608  | 7.64404745  | 2.81702684  |
| C | -3.28834652 | -1.95426042 | -0.51914793 |
| C | -3.58818463 | -0.29466877 | 1.76590178  |
| C | -3.90932892 | -2.46375156 | 0.65183445  |
| C | -2.81728318 | -0.61497345 | -0.54760544 |
| C | -4.05924797 | -1.63395573 | 1.79435930  |

|   |             |             |             |
|---|-------------|-------------|-------------|
| C | -2.96720224 | 0.21482237  | 0.59491941  |
| C | -3.13842747 | -2.78405624 | -1.66167278 |
| C | -4.38039225 | -3.80303852 | 0.68029197  |
| C | -2.19630079 | -0.10548231 | -1.71858782 |
| C | -3.73810369 | 0.53512705  | 2.90842664  |
| C | -4.68023036 | -2.14344688 | 2.96534168  |
| C | -2.49613890 | 1.55410934  | 0.56646189  |
| C | -4.23047320 | -4.63283435 | -0.46223289 |
| C | -2.04638173 | -0.93527813 | -2.86111267 |
| C | -4.83014942 | -1.31365105 | 4.10786653  |
| C | -2.64605795 | 2.38390516  | 1.70898675  |
| C | -3.60949080 | -4.12334324 | -1.63321531 |
| C | -2.51744507 | -2.27456514 | -2.83265520 |
| C | -4.35908609 | 0.02563595  | 4.07940906  |
| C | -3.26704035 | 1.87441406  | 2.87996917  |
| C | -5.00137454 | -4.31252949 | 1.85127422  |
| C | -1.72523755 | 1.23380448  | -1.74704522 |
| C | -5.15129360 | -3.48273366 | 2.99379908  |
| C | -1.87515661 | 2.06360030  | -0.60452036 |
| H | -3.49441209 | -4.76029916 | -2.51022379 |
| H | -2.40236636 | -2.91152105 | -3.70966368 |
| H | -4.47416479 | 0.66259187  | 4.95641753  |
| H | -3.38211906 | 2.51136997  | 3.75697764  |
| H | -5.36296546 | -5.34057380 | 1.87311839  |
| H | -5.62796323 | -3.87382199 | 3.89265182  |
| H | -1.24856792 | 1.62489280  | -2.64589796 |
| H | -1.51356570 | 3.09164461  | -0.62636454 |

|   |             |             |             |
|---|-------------|-------------|-------------|
| H | -4.59206400 | -5.66087852 | -0.44038888 |
| H | -5.30681895 | -1.70473916 | 5.00671920  |
| H | -1.56971220 | -0.54419003 | -3.75996535 |
| H | -2.28446715 | 3.41194933  | 1.68714274  |
| C | 1.00126855  | 3.60783011  | -2.05177780 |
| C | 0.85198127  | 4.23103663  | 0.71497598  |
| C | 1.66480310  | 2.78659925  | -1.10219797 |
| C | 0.26309036  | 4.74066424  | -1.61798074 |
| C | 1.59015946  | 3.09820251  | 0.28117891  |
| C | 0.18844672  | 5.05226749  | -0.23460385 |
| C | 1.07591219  | 3.29622686  | -3.43515469 |
| C | 2.40298129  | 1.65376513  | -1.53599504 |
| C | -0.40044419 | 5.56189510  | -2.56756056 |
| C | 0.77733763  | 4.54263989  | 2.09835287  |
| C | 2.25369401  | 2.27697164  | 1.23075874  |
| C | -0.54973147 | 6.18510161  | 0.19919321  |
| C | 2.47762493  | 1.34216187  | -2.91937192 |
| C | -0.32580055 | 5.25029184  | -3.95093745 |
| C | 2.17905037  | 2.58857490  | 2.61413563  |
| C | -0.62437511 | 6.49670487  | 1.58257010  |
| C | 1.81409038  | 2.16339272  | -3.86895181 |
| C | 0.41237764  | 4.11745771  | -4.38473457 |
| C | 1.44087217  | 3.72140903  | 3.04793275  |
| C | 0.03915943  | 5.67547402  | 2.53214999  |
| C | 3.06651570  | 0.83253446  | -0.58641526 |
| C | -1.13862225 | 6.69472903  | -2.13376345 |
| C | 2.99187206  | 1.14413771  | 0.79696163  |

|   |             |             |             |
|---|-------------|-------------|-------------|
| C | -1.21326589 | 7.00633229  | -0.75038656 |
| H | 1.87138725  | 1.92420432  | -4.93083965 |
| H | 0.46967451  | 3.87826930  | -5.44662241 |
| H | 1.38357530  | 3.96059744  | 4.10982059  |
| H | -0.01813744 | 5.91466242  | 3.59403783  |
| H | 3.63314549  | -0.03703548 | -0.91940034 |
| H | 3.50120497  | 0.51375621  | 1.52586450  |
| H | -1.64795516 | 7.32511054  | -2.86266633 |
| H | -1.77989568 | 7.87590222  | -0.41740148 |
| H | 3.04425459  | 0.47259211  | -3.25235711 |
| H | 2.68838314  | 1.95819360  | 3.34303851  |
| H | -0.83513333 | 5.88067315  | -4.67984034 |
| H | -1.19100477 | 7.36627463  | 1.91555529  |
| C | 3.90438947  | -1.29094942 | 3.42895460  |
| C | 2.26377494  | -2.44274780 | 1.41715342  |
| C | 4.49000894  | -1.79431709 | 2.23728733  |
| C | 2.49846273  | -1.36348094 | 3.61472129  |
| C | 3.66970168  | -2.37021628 | 1.23138674  |
| C | 1.67815547  | -1.93938013 | 2.60882070  |
| C | 4.72469673  | -0.71505023 | 4.43485519  |
| C | 5.89593568  | -1.72178556 | 2.05152064  |
| C | 1.91284325  | -0.86011328 | 4.80638856  |
| C | 1.44346768  | -3.01864699 | 0.41125283  |
| C | 4.25532116  | -2.87358394 | 0.03971946  |
| C | 0.27222873  | -2.01191166 | 2.79458738  |
| C | 6.71624294  | -1.14588637 | 3.05742123  |
| C | 2.73315051  | -0.28421409 | 5.81228915  |

|   |             |             |             |
|---|-------------|-------------|-------------|
| C | 3.43501390  | -3.44948313 | -0.96618113 |
| C | -0.54807853 | -2.58781085 | 1.78868679  |
| C | 6.13062350  | -0.64251868 | 4.24908855  |
| C | 4.13907728  | -0.21168254 | 5.62652251  |
| C | 2.02908713  | -3.52201468 | -0.78041449 |
| C | 0.03754091  | -3.09117854 | 0.59701947  |
| C | 6.48155497  | -2.22515319 | 0.85985350  |
| C | 0.50691670  | -0.93264484 | 4.99215511  |
| C | 5.66124771  | -2.80105238 | -0.14604709 |
| C | -0.31339056 | -1.50854403 | 3.98625452  |
| H | 6.76029594  | -0.20045524 | 5.02122347  |
| H | 4.76874973  | 0.23038090  | 6.39865744  |
| H | 1.39941468  | -3.96407812 | -1.55254941 |
| H | -0.59213153 | -3.53324198 | -0.17511545 |
| H | 7.56075235  | -2.16947758 | 0.71725792  |
| H | 6.11077257  | -3.18744026 | -1.06077768 |
| H | 0.05739184  | -0.54625696 | 5.90688571  |
| H | -1.39258794 | -1.56421964 | 4.12885011  |
| H | 7.79544017  | -1.09021070 | 2.91482583  |
| H | 3.88453854  | -3.83587100 | -1.88091163 |
| H | 2.28362587  | 0.10217378  | 6.72701965  |
| H | -1.62727576 | -2.64348652 | 1.93128220  |
| C | -5.16633422 | 1.73116740  | -2.53495785 |
| C | -6.34637450 | 1.34221856  | 0.01882821  |
| C | -5.14850935 | 2.77963657  | -1.57746386 |
| C | -5.77417924 | 0.48822381  | -2.21555882 |
| C | -5.73852948 | 2.58516215  | -0.30057083 |

|   |             |             |             |
|---|-------------|-------------|-------------|
| C | -6.36419938 | 0.29374939  | -0.93866579 |
| C | -4.57631408 | 1.92564183  | -3.81185088 |
| C | -4.54066433 | 4.02258016  | -1.89686289 |
| C | -5.79200412 | -0.56024536 | -3.17305281 |
| C | -6.93639464 | 1.14774414  | 1.29572124  |
| C | -5.72070461 | 3.63363132  | 0.65692317  |
| C | -6.97204439 | -0.94919420 | -0.61926675 |
| C | -3.95064419 | 4.21705458  | -3.17375592 |
| C | -5.20198398 | -0.36577093 | -4.44994585 |
| C | -6.31072475 | 3.43915690  | 1.93381620  |
| C | -7.56206453 | -1.14366862 | 0.65762628  |
| C | -3.96846904 | 3.16858542  | -4.13124997 |
| C | -4.59413894 | 0.87717266  | -4.76934493 |
| C | -6.91856979 | 2.19621330  | 2.25321529  |
| C | -7.54423968 | -0.09519946 | 1.61512033  |
| C | -4.52283951 | 5.07104911  | -0.93936896 |
| C | -6.39984907 | -1.80318872 | -2.85365372 |
| C | -5.11285965 | 4.87657469  | 0.33752407  |
| C | -6.98986921 | -1.99766315 | -1.57676069 |
| H | -3.51556628 | 3.31786508  | -5.11140021 |
| H | -4.14123618 | 1.02645232  | -5.74949517 |
| H | -7.37147255 | 2.04693364  | 3.23336553  |
| H | -7.99714244 | -0.24447912 | 2.59527057  |
| H | -4.05625422 | 6.02513971  | -1.18454146 |
| H | -5.09917716 | 5.68138561  | 1.07250191  |
| H | -6.41353156 | -2.60799965 | -3.58863156 |
| H | -7.45645451 | -2.95175374 | -1.33158818 |

|   |             |             |             |
|---|-------------|-------------|-------------|
| H | -3.48405893 | 5.17114497  | -3.41892854 |
| H | -6.29704234 | 4.24396759  | 2.66879403  |
| H | -5.21566638 | -1.17058163 | -5.18492368 |
| H | -8.02864979 | -2.09775900 | 0.90279890  |
| K | 0.20465800  | 0.10074000  | 0.48149700  |

217

n = 6, Energy = -658.57230967

|   |            |             |             |
|---|------------|-------------|-------------|
| C | 5.51931736 | 2.50365726  | 3.66247618  |
| C | 5.28392966 | 4.09161536  | 1.31970405  |
| C | 5.99011219 | 2.00738282  | 2.41810325  |
| C | 4.93082869 | 3.79391075  | 3.73546304  |
| C | 5.87241834 | 2.80136187  | 1.24671719  |
| C | 4.81313484 | 4.58788980  | 2.56407698  |
| C | 5.63701121 | 1.70967821  | 4.83386224  |
| C | 6.57860087 | 0.71712933  | 2.34511638  |
| C | 4.46003386 | 4.29018520  | 4.97983597  |
| C | 5.16623581 | 4.88559441  | 0.14831799  |
| C | 6.34321317 | 2.30508743  | 0.00234426  |
| C | 4.22464616 | 5.87814329  | 2.63706385  |
| C | 6.69629472 | -0.07684972 | 3.51650244  |
| C | 4.57772771 | 3.49620615  | 6.15122203  |
| C | 6.22551932 | 3.09906648  | -1.16904180 |
| C | 4.10695231 | 6.67212234  | 1.46567779  |
| C | 6.22549990 | 0.41942469  | 4.76087542  |
| C | 5.16621639 | 2.20595262  | 6.07823521  |
| C | 5.63703064 | 4.38932001  | -1.09605499 |
| C | 4.57774713 | 6.17584794  | 0.22130481  |

|   |             |             |             |
|---|-------------|-------------|-------------|
| C | 7.04939560  | 0.22085507  | 1.10074358  |
| C | 3.87154528  | 5.58043851  | 5.05282271  |
| C | 6.93170175  | 1.01483412  | -0.07064248 |
| C | 3.75385143  | 6.37441756  | 3.88143665  |
| H | 6.31584236  | -0.19003807 | 5.66003791  |
| H | 5.25655885  | 1.59648986  | 6.97739771  |
| H | 5.54668818  | 4.99878277  | -1.99521748 |
| H | 4.48740467  | 6.78531070  | -0.67785768 |
| H | 7.50112287  | -0.76955087 | 1.04471842  |
| H | 7.29308655  | 0.63389101  | -1.02583023 |
| H | 3.51016048  | 5.96138162  | 6.00801046  |
| H | 3.30212416  | 7.36482350  | 3.93746181  |
| H | 7.14802189  | -1.06725551 | 3.46047746  |
| H | 6.58690401  | 2.71812358  | -2.12422947 |
| H | 4.21634301  | 3.87714905  | 7.10640970  |
| H | 3.65522513  | 7.66252814  | 1.52170277  |
| C | 1.72467538  | 0.38616063  | -3.33910968 |
| C | 3.12860033  | -1.74821627 | -2.09853340 |
| C | 3.13578320  | 0.29438700  | -3.46854075 |
| C | 1.01553003  | -0.58925419 | -2.58939048 |
| C | 3.83774567  | -0.77280144 | -2.84825260 |
| C | 1.71749251  | -1.65644264 | -1.96910234 |
| C | 1.02271290  | 1.45334907  | -3.95939783 |
| C | 3.84492854  | 1.26980182  | -4.21825995 |
| C | -0.39557779 | -0.49748057 | -2.45995942 |
| C | 3.83056280  | -2.81540471 | -1.47824525 |
| C | 5.24885349  | -0.86457507 | -2.97768366 |



|   |             |             |             |
|---|-------------|-------------|-------------|
| C | 1.00834717  | -2.63185746 | -1.21938313 |
| C | 3.14296606  | 2.33699027  | -4.83854809 |
| C | -1.09754026 | 0.56970788  | -3.08024756 |
| C | 5.95081597  | -1.93176352 | -2.35739552 |
| C | 1.71030964  | -3.69904591 | -0.59909499 |
| C | 1.73185821  | 2.42876394  | -4.70911706 |
| C | -0.38839495 | 1.54512274  | -3.82996679 |
| C | 5.24167065  | -2.90717838 | -1.60767629 |
| C | 3.12141749  | -3.79081958 | -0.72852602 |
| C | 5.25603615  | 1.17802811  | -4.34769093 |
| C | -1.10472292 | -1.47289530 | -1.71024030 |
| C | 5.95799863  | 0.11083966  | -3.72740278 |
| C | -0.40276045 | -2.54008375 | -1.08995215 |
| H | 1.19302789  | 3.24794376  | -5.18525371 |
| H | -0.92722527 | 2.36430257  | -4.30610344 |
| H | 5.78050098  | -3.72635821 | -1.13153964 |
| H | 3.66024782  | -4.60999940 | -0.25238937 |
| H | 5.80038018  | 1.92676208  | -4.92317966 |
| H | 7.04117304  | 0.04039372  | -3.82675482 |
| H | -2.18789734 | -1.40244936 | -1.61088826 |
| H | -0.94710448 | -3.28881772 | -0.51446342 |
| H | 3.68730986  | 3.08572420  | -5.41403677 |
| H | 7.03399020  | -2.00220959 | -2.45674744 |
| H | -2.18071450 | 0.64015395  | -2.98089564 |
| H | 1.16596585  | -4.44777984 | -0.02360631 |
| C | 1.96507601  | 2.47401781  | 1.83517248  |
| C | 1.12952163  | 2.91914107  | 4.51272989  |

|   |             |             |             |
|---|-------------|-------------|-------------|
| C | 1.31412672  | 3.68701408  | 2.18346137  |
| C | 2.19824812  | 1.48358317  | 2.82566230  |
| C | 0.89634953  | 3.90957570  | 3.52224008  |
| C | 1.78047093  | 1.70614480  | 4.16444100  |
| C | 2.38285320  | 2.25145618  | 0.49639378  |
| C | 1.08095461  | 4.67744872  | 1.19297156  |
| C | 2.84919741  | 0.27058691  | 2.47737341  |
| C | 0.71174444  | 3.14170269  | 5.85150860  |
| C | 0.24540023  | 5.12257197  | 3.87052897  |
| C | 2.01364303  | 0.71571016  | 5.15493082  |
| C | 1.49873180  | 4.45488709  | -0.14580715 |
| C | 3.26697460  | 0.04802528  | 1.13859470  |
| C | -0.17237696 | 5.34513360  | 5.20930767  |
| C | 1.59586584  | 0.93827179  | 6.49370952  |
| C | 2.14968111  | 3.24189081  | -0.49409609 |
| C | 3.03380251  | 1.03845991  | 0.14810483  |
| C | 0.06079513  | 4.35469897  | 6.19979754  |
| C | 0.94491653  | 2.15126806  | 6.84199847  |
| C | 0.43000540  | 5.89044477  | 1.54126051  |
| C | 3.08236943  | -0.71984752 | 3.46786316  |
| C | 0.01222821  | 6.11300640  | 2.88003921  |
| C | 2.66459224  | -0.49728589 | 4.80664186  |
| H | 2.47036922  | 3.07105126  | -1.52175012 |
| H | 3.35449062  | 0.86762036  | -0.87954920 |
| H | -0.25989298 | 4.52553852  | 7.22745157  |
| H | 0.62422842  | 2.32210761  | 7.86965249  |
| H | 0.25102116  | 6.65070806  | 0.78095489  |

|   |             |             |             |
|---|-------------|-------------|-------------|
| H | -0.48744418 | 7.04410925  | 3.14738773  |
| H | 3.58204182  | -1.65095038 | 3.20051464  |
| H | 2.84357648  | -1.25754918 | 5.56694748  |
| H | 1.31974766  | 5.21515015  | -0.90611276 |
| H | -0.67204928 | 6.27623625  | 5.47665631  |
| H | 3.76664692  | -0.88307738 | 0.87124606  |
| H | 1.77484998  | 0.17800872  | 7.25401513  |
| C | -4.35855309 | -1.82828006 | -0.22986257 |
| C | -2.99442471 | 0.33424572  | 1.00635566  |
| C | -4.53000500 | -0.50697405 | -0.72093768 |
| C | -3.50503699 | -2.06832317 | 0.87932165  |
| C | -3.84794081 | 0.57428884  | -0.10282857 |
| C | -2.82297280 | -0.98706028 | 1.49743077  |
| C | -5.04061728 | -2.90954295 | -0.84797169 |
| C | -5.38352111 | -0.26693094 | -1.83012191 |
| C | -3.33358507 | -3.38962917 | 1.37039676  |
| C | -2.31236052 | 1.41550862  | 1.62446477  |
| C | -4.01939273 | 1.89559484  | -0.59390367 |
| C | -1.96945669 | -1.22710339 | 2.60661499  |
| C | -6.06558530 | -1.34819383 | -2.44823102 |
| C | -4.01564926 | -4.47089207 | 0.75228764  |
| C | -3.33732854 | 2.97685773  | 0.02420544  |
| C | -1.28739250 | -0.14584050 | 3.22472411  |
| C | -5.89413341 | -2.66949988 | -1.95715594 |
| C | -4.86916539 | -4.23084900 | -0.35689661 |
| C | -2.48381240 | 2.73681467  | 1.13338969  |
| C | -1.45884439 | 1.17546555  | 2.73364902  |

|   |             |             |             |
|---|-------------|-------------|-------------|
| C | -5.55497292 | 1.05437491  | -2.32119686 |
| C | -2.48006907 | -3.62967214 | 2.47958083  |
| C | -4.87290873 | 2.13563780  | -1.70308774 |
| C | -1.79800488 | -2.54840925 | 3.09768994  |
| H | -6.41768970 | -3.49948333 | -2.43161996 |
| H | -5.39272168 | -5.06083244 | -0.83136063 |
| H | -1.96025612 | 3.56679811  | 1.60785371  |
| H | -0.93528810 | 2.00544899  | 3.20811304  |
| H | -6.21013674 | 1.23863339  | -3.17261299 |
| H | -5.00451621 | 3.14987982  | -2.08003981 |
| H | -2.34846159 | -4.64391416 | 2.85653289  |
| H | -1.14284105 | -2.73266773 | 3.94910608  |
| H | -6.72074905 | -1.16393555 | -3.29964703 |
| H | -3.46893589 | 3.99109965  | -0.35274644 |
| H | -3.88404191 | -5.48513398 | 1.12923953  |
| H | -0.63222875 | -0.33009879 | 4.07614011  |
| C | 1.29272880  | -4.02631658 | -4.60985683 |
| C | -0.57607716 | -2.12563866 | -5.58995235 |
| C | -0.08362823 | -4.15029324 | -4.28325127 |
| C | 1.73468285  | -2.95200096 | -5.42651015 |
| C | -1.01803121 | -3.19995428 | -4.77329903 |
| C | 0.80027987  | -2.00166200 | -5.91655791 |
| C | 2.22713178  | -4.97665555 | -4.11980907 |
| C | -0.52558228 | -5.22460886 | -3.46659795 |
| C | 3.11103988  | -2.82802431 | -5.75311571 |
| C | -1.51048014 | -1.17529970 | -6.08000011 |
| C | -2.39438824 | -3.32393094 | -4.44669347 |

|   |             |             |             |
|---|-------------|-------------|-------------|
| C | 1.24223392  | -0.92734638 | -6.73321123 |
| C | 0.40882070  | -6.17494782 | -2.97655020 |
| C | 4.04544286  | -3.77836327 | -5.26306795 |
| C | -3.32879122 | -2.37359198 | -4.93674123 |
| C | 0.30783094  | 0.02299258  | -7.22325899 |
| C | 1.78517777  | -6.05097121 | -3.30315573 |
| C | 3.60348885  | -4.85267893 | -4.44641461 |
| C | -2.88683721 | -1.29927632 | -5.75339457 |
| C | -1.06852613 | -0.10098404 | -6.89665345 |
| C | -1.90193914 | -5.34858540 | -3.13999251 |
| C | 3.55299375  | -1.75370880 | -6.56976892 |
| C | -2.83634212 | -4.39824644 | -3.63004027 |
| C | 2.61859077  | -0.80336984 | -7.05981668 |
| H | 2.50243072  | -6.78045671 | -2.92699233 |
| H | 4.32074180  | -5.58216443 | -4.07025121 |
| H | -3.60409017 | -0.56979081 | -6.12955797 |
| H | -1.78577909 | 0.62850147  | -7.27281685 |
| H | -2.24118560 | -6.17323620 | -2.51312476 |
| H | -3.89284162 | -4.49341165 | -3.37933596 |
| H | 4.60949325  | -1.65854360 | -6.82047322 |
| H | 2.95783724  | 0.02128095  | -7.68668442 |
| H | 0.06957444  | -6.99959854 | -2.34968254 |
| H | -4.38529059 | -2.46875702 | -4.68603706 |
| H | 5.10194222  | -3.68319822 | -5.51377212 |
| H | 0.64707719  | 0.84764330  | -7.85012664 |
| C | -4.50829043 | 0.05031751  | 4.79925963  |
| C | -6.10575199 | 1.09379018  | 2.69571955  |

|   |             |             |            |
|---|-------------|-------------|------------|
| C | -4.48272588 | 1.44049022  | 4.51087387 |
| C | -5.33258575 | -0.81811887 | 4.03587536 |
| C | -5.28145666 | 1.96222656  | 3.45910383 |
| C | -6.13131653 | -0.29638253 | 2.98410532 |
| C | -3.70955965 | -0.47141883 | 5.85102967 |
| C | -3.65843056 | 2.30892660  | 5.27425814 |
| C | -5.35815029 | -2.20829159 | 4.32426112 |
| C | -6.90448277 | 1.61552652  | 1.64394952 |
| C | -5.25589212 | 3.35239928  | 3.17071807 |
| C | -6.95561185 | -1.16481891 | 2.22072104 |
| C | -2.85969978 | 1.78719027  | 6.32602818 |
| C | -4.55941951 | -2.73002793 | 5.37603116 |
| C | -6.05462290 | 3.87413562  | 2.11894803 |
| C | -7.75434264 | -0.64308258 | 1.16895101 |
| C | -2.88526429 | 0.39701753  | 6.61441399 |
| C | -3.73512416 | -1.86159157 | 6.13941548 |
| C | -6.87891826 | 3.00569926  | 1.35556371 |
| C | -7.72877813 | 0.74709016  | 0.88056520 |
| C | -3.63286610 | 3.69909910  | 4.98587233 |
| C | -6.18244554 | -3.07672775 | 3.56087689 |
| C | -4.43159688 | 4.22083544  | 3.93410229 |
| C | -6.98117632 | -2.55499141 | 2.50910685 |
| H | -2.27215407 | -0.00347020 | 7.42175856 |
| H | -3.12201394 | -2.26207930 | 6.94676004 |
| H | -7.49202848 | 3.40618699  | 0.54821914 |
| H | -8.34188834 | 1.14757789  | 0.07322063 |
| H | -3.00013231 | 4.36571583  | 5.57185045 |

|   |             |             |            |
|---|-------------|-------------|------------|
| H | -4.41197338 | 5.28793995  | 3.71273575 |
| H | -6.20206904 | -4.14383226 | 3.78224343 |
| H | -7.61391010 | -3.22160815 | 1.92312874 |
| H | -2.22696604 | 2.45380676  | 6.91200629 |
| H | -6.03499952 | 4.94123993  | 1.89758139 |
| H | -4.57904290 | -3.79713224 | 5.59739779 |
| H | -8.38707637 | -1.30969907 | 0.58297289 |
| K | 0.20465800  | 0.10074000  | 0.48149700 |

253

n = 7, Energy = -737.74117835

|   |            |            |             |
|---|------------|------------|-------------|
| C | 3.35773339 | 4.46269852 | 4.64527187  |
| C | 2.85769572 | 5.70202241 | 2.13935125  |
| C | 2.23650067 | 5.31977089 | 4.48822339  |
| C | 4.22894727 | 4.22528809 | 3.54936005  |
| C | 1.98648184 | 5.93943283 | 3.23526308  |
| C | 3.97892844 | 4.84495004 | 2.29639974  |
| C | 3.60775222 | 3.84303657 | 5.89823218  |
| C | 1.36528678 | 5.55718131 | 5.58413522  |
| C | 5.35017999 | 3.36821572 | 3.70640853  |
| C | 2.60767689 | 6.32168435 | 0.88639095  |
| C | 0.86524912 | 6.79650520 | 3.07821460  |
| C | 4.85014233 | 4.60753961 | 1.20048791  |
| C | 1.61530561 | 4.93751937 | 6.83709553  |
| C | 5.60019882 | 2.74855378 | 4.95936884  |
| C | 0.61523029 | 7.41616715 | 1.82525429  |
| C | 4.60012350 | 5.22720156 | -0.05247240 |
| C | 2.73653834 | 4.08044697 | 6.99414406  |

|   |             |             |             |
|---|-------------|-------------|-------------|
| C | 4.72898494  | 2.98596418  | 6.05528072  |
| C | 1.48644417  | 7.17875675  | 0.72934241  |
| C | 3.47889077  | 6.08427395  | -0.20952093 |
| C | 0.24405426  | 6.41425357  | 5.42708664  |
| C | 6.22139368  | 3.13080541  | 2.61049679  |
| C | -0.00596457 | 7.03391552  | 4.17412634  |
| C | 5.97137485  | 3.75046735  | 1.35753648  |
| H | 2.92845420  | 3.60479099  | 7.95592341  |
| H | 4.92090080  | 2.51030820  | 7.01706006  |
| H | 1.29452831  | 7.65441273  | -0.23243693 |
| H | 3.28697491  | 6.55992993  | -1.17130028 |
| H | -0.42469450 | 6.59649118  | 6.26831480  |
| H | -0.86662920 | 7.69180916  | 4.05357504  |
| H | 7.08205831  | 2.47291177  | 2.73104808  |
| H | 6.64012361  | 3.56822974  | 0.51630832  |
| H | 0.94655706  | 5.11975684  | 7.67832365  |
| H | -0.24543416 | 8.07406070  | 1.70470285  |
| H | 6.46086327  | 2.09066022  | 5.07992027  |
| H | 5.26887205  | 5.04496408  | -0.89370052 |
| C | -5.08776991 | -3.62606149 | 2.83135546  |
| C | -3.09470151 | -3.14575789 | 4.79670182  |
| C | -5.13658733 | -2.44500941 | 3.61820546  |
| C | -4.04241829 | -4.56696177 | 3.02717865  |
| C | -4.14005313 | -2.20485761 | 4.60087864  |
| C | -3.04588409 | -4.32680997 | 4.00985183  |
| C | -6.08430412 | -3.86621329 | 1.84868229  |
| C | -6.18193896 | -1.50410912 | 3.42238228  |



|   |             |             |            |
|---|-------------|-------------|------------|
| C | -3.99360087 | -5.74801385 | 2.24032865 |
| C | -2.09816731 | -2.90560609 | 5.77937500 |
| C | -4.18887055 | -1.02380552 | 5.38772863 |
| C | -2.00053247 | -5.26771025 | 4.20567501 |
| C | -7.17847316 | -1.74426092 | 2.43970910 |
| C | -4.99013507 | -5.98816565 | 1.25765547 |
| C | -3.19233635 | -0.78365372 | 6.37040181 |
| C | -1.00399826 | -5.02755846 | 5.18834819 |
| C | -7.12965578 | -2.92531301 | 1.65285906 |
| C | -6.03548674 | -5.04726538 | 1.06183225 |
| C | -2.14698468 | -1.72455400 | 6.56622503 |
| C | -1.05281564 | -3.84650636 | 5.97519822 |
| C | -6.23075627 | -0.32305725 | 4.20923221 |
| C | -2.94824935 | -6.68891393 | 2.43615189 |
| C | -5.23422207 | -0.08290545 | 5.19190539 |
| C | -1.95171515 | -6.44876213 | 3.41882507 |
| H | -7.89460101 | -3.10965488 | 0.89855363 |
| H | -6.80043197 | -5.23160724 | 0.30752682 |
| H | -1.38203945 | -1.54021213 | 7.32053047 |
| H | -0.28787041 | -3.66216450 | 6.72950365 |
| H | -7.03317413 | 0.39918319  | 4.05891724 |
| H | -5.27169461 | 0.82367687  | 5.79589593 |
| H | -2.91077681 | -7.59549625 | 1.83216136 |
| H | -1.14929729 | -7.17100257 | 3.56914005 |
| H | -7.98089096 | -1.02202070 | 2.28939402 |
| H | -3.22980875 | 0.12292840  | 6.97439233 |
| H | -4.95266267 | -6.89474778 | 0.65366496 |

|   |             |             |             |
|---|-------------|-------------|-------------|
| H | -0.20158047 | -5.74979867 | 5.33866326  |
| C | -3.34039045 | -2.00742629 | 0.14975934  |
| C | -1.24763590 | -3.89149094 | 0.51891824  |
| C | -3.27187695 | -3.16276763 | -0.67297534 |
| C | -2.36252667 | -1.79411727 | 1.15707348  |
| C | -2.22549968 | -4.10479995 | -0.48839589 |
| C | -1.31614939 | -2.73614959 | 1.34165293  |
| C | -4.38676773 | -1.06539396 | -0.03482011 |
| C | -4.24974073 | -3.37607665 | -1.68028948 |
| C | -2.43104017 | -0.63877593 | 1.97980816  |
| C | -0.20125862 | -4.83352326 | 0.70349770  |
| C | -2.15698618 | -5.26014130 | -1.31113057 |
| C | -0.33828561 | -2.52284058 | 2.34896706  |
| C | -5.29611801 | -2.43404432 | -1.86486893 |
| C | -3.47741744 | 0.30325640  | 1.79522871  |
| C | -1.11060891 | -6.20217362 | -1.12655112 |
| C | 0.70809166  | -3.46487290 | 2.53354652  |
| C | -5.36463155 | -1.27870294 | -1.04213425 |
| C | -4.45528127 | 0.08994742  | 0.78791457  |
| C | -0.13274508 | -5.98886464 | -0.11923698 |
| C | 0.77660520  | -4.62021428 | 1.71081184  |
| C | -4.18122715 | -4.53141786 | -2.50302398 |
| C | -1.45317647 | -0.42546704 | 2.98712212  |
| C | -3.13484988 | -5.47345018 | -2.31844453 |
| C | -0.40679920 | -1.36749937 | 3.17170157  |
| H | -6.16783660 | -0.55559366 | -1.18381847 |
| H | -5.25848632 | 0.81305671  | 0.64623035  |

|   |             |             |             |
|---|-------------|-------------|-------------|
| H | 0.67045997  | -6.71197393 | 0.02244724  |
| H | 1.57981025  | -5.34332357 | 1.85249606  |
| H | -4.93184096 | -4.69515509 | -3.27624406 |
| H | -3.08225854 | -6.36029678 | -2.94998038 |
| H | -1.50576781 | 0.46137956  | 3.61865796  |
| H | 0.34381461  | -1.20376213 | 3.94492165  |
| H | -6.04673177 | -2.59778138 | -2.63808884 |
| H | -1.05801744 | -7.08902013 | -1.75808678 |
| H | -3.53000891 | 1.19010290  | 2.42676437  |
| H | 1.45870542  | -3.30113584 | 3.30676643  |
| C | -5.43812159 | 4.40521054  | -1.62575159 |
| C | -5.20335557 | 5.11711947  | 1.11353118  |
| C | -4.58733048 | 5.47487343  | -1.24055569 |
| C | -6.17152968 | 3.69150212  | -0.64130609 |
| C | -4.46994747 | 5.83082789  | 0.12908569  |
| C | -6.05414667 | 4.04745658  | 0.72833529  |
| C | -5.55550460 | 4.04925608  | -2.99539297 |
| C | -3.85392238 | 6.18858185  | -2.22500119 |
| C | -7.02232079 | 2.62183923  | -1.02650199 |
| C | -5.08597256 | 5.47307394  | 2.48317257  |
| C | -3.61915636 | 6.90049078  | 0.51428159  |
| C | -6.78755477 | 3.33374816  | 1.71278078  |
| C | -3.97130539 | 5.83262738  | -3.59464257 |
| C | -7.13970380 | 2.26588477  | -2.39614337 |
| C | -3.50177335 | 7.25644524  | 1.88392297  |
| C | -6.67017176 | 3.68970263  | 3.08242217  |
| C | -4.82209650 | 4.76296448  | -3.97983852 |

|   |             |             |             |
|---|-------------|-------------|-------------|
| C | -6.40629571 | 2.97959317  | -3.38058892 |
| C | -4.23518144 | 6.54273684  | 2.86836852  |
| C | -5.81938065 | 4.75936553  | 3.46761812  |
| C | -3.00313142 | 7.25824456  | -1.83980523 |
| C | -7.75572874 | 1.90813099  | -0.04205655 |
| C | -2.88574841 | 7.61419903  | -0.47016385 |
| C | -7.63834573 | 2.26408545  | 1.32758483  |
| H | -4.91220036 | 4.48973184  | -5.03118292 |
| H | -6.49639956 | 2.70636053  | -4.43193332 |
| H | -4.14507759 | 6.81596948  | 3.91971291  |
| H | -5.72927680 | 5.03259817  | 4.51896251  |
| H | -2.44016318 | 7.80609123  | -2.59547120 |
| H | -2.23267630 | 8.43527836  | -0.17448530 |
| H | -8.40880085 | 1.08705165  | -0.33773510 |
| H | -8.20131398 | 1.71623878  | 2.08325079  |
| H | -3.40833730 | 6.38047386  | -4.35030853 |
| H | -2.84870139 | 8.07752442  | 2.17960163  |
| H | -7.79277577 | 1.44480559  | -2.69182204 |
| H | -7.23313985 | 3.14185615  | 3.83808813  |
| C | -1.05064135 | 0.86878506  | -6.05172633 |
| C | 1.08760704  | -0.99359857 | -5.89354752 |
| C | -1.31335526 | -0.48772534 | -5.72421904 |
| C | 0.28119675  | 1.29410364  | -6.30014421 |
| C | -0.24423106 | -1.41891715 | -5.64512964 |
| C | 1.35032095  | 0.36291183  | -6.22105481 |
| C | -2.11976555 | 1.79997687  | -6.13081573 |
| C | -2.64519336 | -0.91304392 | -5.47580116 |

|   |             |             |             |
|---|-------------|-------------|-------------|
| C | 0.54391066  | 2.65061404  | -6.62765150 |
| C | 2.15673124  | -1.92479038 | -5.81445811 |
| C | -0.50694497 | -2.77542755 | -5.31762235 |
| C | 2.68215905  | 0.78823041  | -6.46947269 |
| C | -3.71431756 | 0.01814790  | -5.55489056 |
| C | -0.52521354 | 3.58180585  | -6.70674091 |
| C | 0.56217923  | -3.70661936 | -5.23853294 |
| C | 3.75128325  | -0.14296141 | -6.39038329 |
| C | -3.45160370 | 1.37465833  | -5.88239785 |
| C | -1.85705169 | 3.15648731  | -6.45832303 |
| C | 1.89401738  | -3.28130082 | -5.48695082 |
| C | 3.48856939  | -1.49947184 | -6.06287600 |
| C | -2.90790712 | -2.26955414 | -5.14829392 |
| C | 1.87574861  | 3.07593245  | -6.87606933 |
| C | -1.83878292 | -3.20074596 | -5.06920452 |
| C | 2.94487280  | 2.14474063  | -6.79697993 |
| H | -4.27226942 | 2.08944638  | -5.94310732 |
| H | -2.67771740 | 3.87127536  | -6.51903250 |
| H | 2.71468309  | -3.99608887 | -5.42624135 |
| H | 4.30923510  | -2.21425989 | -6.00216653 |
| H | -3.93023364 | -2.59603113 | -4.95760693 |
| H | -2.04044363 | -4.24201107 | -4.81780805 |
| H | 2.07740932  | 4.11719756  | -7.12746580 |
| H | 3.96719932  | 2.47121762  | -6.98766691 |
| H | -4.73664397 | -0.30832888 | -5.36420363 |
| H | 0.36051871  | -4.74788434 | -4.98713653 |
| H | -0.32355303 | 4.62307083  | -6.95813732 |

|   |             |             |             |
|---|-------------|-------------|-------------|
| H | 4.77360966  | 0.18351537  | -6.58107022 |
| C | 2.04943370  | 1.49737721  | 2.87876162  |
| C | 0.25308437  | 1.92024336  | 5.03744474  |
| C | 2.26604860  | 0.84445695  | 4.12100684  |
| C | 0.93464412  | 2.36173054  | 2.71585795  |
| C | 1.36787394  | 1.05589003  | 5.20034840  |
| C | 0.03646946  | 2.57316362  | 3.79519951  |
| C | 2.94760836  | 1.28594413  | 1.79942006  |
| C | 3.38083817  | -0.01989638 | 4.28391050  |
| C | 0.71802922  | 3.01465080  | 1.47361273  |
| C | -0.64509030 | 2.13167644  | 6.11678630  |
| C | 1.58448884  | 0.40296977  | 6.44259363  |
| C | -1.07832011 | 3.43751695  | 3.63229585  |
| C | 4.27901284  | -0.23132946 | 3.20456894  |
| C | 1.61620388  | 2.80321772  | 0.39427117  |
| C | 0.68631418  | 0.61440285  | 7.52193519  |
| C | -1.97649477 | 3.64895003  | 4.71163741  |
| C | 4.06239797  | 0.42159079  | 1.96232367  |
| C | 2.73099349  | 1.93886438  | 0.55717479  |
| C | -0.42847543 | 1.47875619  | 7.35903157  |
| C | -1.75987991 | 2.99602978  | 5.95388268  |
| C | 3.59745295  | -0.67281649 | 5.52615559  |
| C | -0.39676022 | 3.87900399  | 1.31070920  |
| C | 2.69927829  | -0.46138342 | 6.60549715  |
| C | -1.29493489 | 4.09043706  | 2.39005076  |
| H | 4.75184187  | 0.25929358  | 1.13381505  |
| H | 3.42043739  | 1.77656717  | -0.27133384 |

|   |             |             |             |
|---|-------------|-------------|-------------|
| H | -1.11791933 | 1.64105340  | 8.18754019  |
| H | -2.44932380 | 3.15832699  | 6.78239130  |
| H | 4.45317178  | -1.33629905 | 5.65120139  |
| H | 2.86555314  | -0.96256874 | 7.55905167  |
| H | -0.56303508 | 4.38018931  | 0.35715469  |
| H | -2.15065372 | 4.75391962  | 2.26500496  |
| H | 5.13473157  | -0.89481187 | 3.32961456  |
| H | 0.85258887  | 0.11321768  | 8.47548961  |
| H | 1.44992919  | 3.30440289  | -0.55928325 |
| H | -2.83221351 | 4.31243244  | 4.58659179  |
| C | 1.59268631  | 0.09700825  | -2.54736875 |
| C | 2.10950042  | 2.82954849  | -3.12332581 |
| C | 0.51731279  | 1.02048883  | -2.63195882 |
| C | 2.92646689  | 0.53979779  | -2.75075721 |
| C | 0.77571984  | 2.38675895  | -2.91993734 |
| C | 3.18487395  | 1.90606791  | -3.03873574 |
| C | 1.33427925  | -1.26926187 | -2.25939022 |
| C | -0.81646779 | 0.57769929  | -2.42857035 |
| C | 4.00184041  | -0.38368279 | -2.66616715 |
| C | 2.36790748  | 4.19581861  | -3.41130434 |
| C | -0.29965368 | 3.31023953  | -3.00452741 |
| C | 4.51865453  | 2.34885744  | -3.24212420 |
| C | -1.07487485 | -0.78857083 | -2.14059182 |
| C | 3.74343336  | -1.74995291 | -2.37818862 |
| C | -0.04124662 | 4.67650965  | -3.29250594 |
| C | 4.77706158  | 3.71512756  | -3.53010273 |
| C | 0.00049866  | -1.71205147 | -2.05600175 |

|   |             |             |             |
|---|-------------|-------------|-------------|
| C | 2.40965277  | -2.19274251 | -2.17480014 |
| C | 1.29253397  | 5.11929924  | -3.49589442 |
| C | 3.70168807  | 4.63860820  | -3.61469281 |
| C | -1.89184108 | 1.50117982  | -2.51316043 |
| C | 5.33562076  | 0.05910679  | -2.86955560 |
| C | -1.63343403 | 2.86744994  | -2.80113896 |
| C | 5.59402782  | 1.42537691  | -3.15753413 |
| H | -0.19785604 | -2.76080806 | -1.83494781 |
| H | 2.21129806  | -3.24149910 | -1.95374621 |
| H | 1.49088867  | 6.16805583  | -3.71694835 |
| H | 3.90004277  | 5.68736479  | -3.83574674 |
| H | -2.91565867 | 1.16129207  | -2.35703829 |
| H | -2.45889689 | 3.57631889  | -2.86607077 |
| H | 6.16108362  | -0.64976216 | -2.80462378 |
| H | 6.61784540  | 1.76526467  | -3.31365627 |
| H | -2.09869221 | -1.12845869 | -1.98446968 |
| H | -0.86670924 | 5.38537860  | -3.35743778 |
| H | 4.56889598  | -2.45882187 | -2.31325678 |
| H | 5.80087895  | 4.05501542  | -3.68622487 |
| K | 0.20465800  | 0.10074000  | 0.48149700  |

289

n = 8, Energy = -830.31047610

|   |            |            |             |
|---|------------|------------|-------------|
| C | 1.89296673 | 6.59764168 | -1.79285774 |
| C | 3.03807276 | 4.40924700 | -3.19473520 |
| C | 3.08266941 | 5.99019800 | -1.31117344 |
| C | 1.27581706 | 6.11088803 | -2.97548078 |
| C | 3.65522243 | 4.89600066 | -2.01211217 |



|   |             |            |             |
|---|-------------|------------|-------------|
| C | 1.84837007  | 5.01669068 | -3.67641950 |
| C | 1.32041371  | 7.69183903 | -1.09191901 |
| C | 3.69981908  | 6.47695166 | -0.12855041 |
| C | 0.08611437  | 6.71833171 | -3.45716508 |
| C | 3.61062577  | 3.31504966 | -3.89567393 |
| C | 4.84492511  | 4.28855697 | -1.53042786 |
| C | 1.23122040  | 4.52993703 | -4.85904254 |
| C | 3.12726607  | 7.57114900 | 0.57238832  |
| C | -0.48643864 | 7.81252905 | -2.75622635 |
| C | 5.41747813  | 3.19435963 | -2.23136659 |
| C | 1.80377341  | 3.43573968 | -5.55998126 |
| C | 1.93756336  | 8.17859273 | 0.09070405  |
| C | 0.13071100  | 8.29928276 | -1.57360329 |
| C | 4.80032848  | 2.70760593 | -3.41398965 |
| C | 2.99347612  | 2.82829595 | -5.07829699 |
| C | 4.88952159  | 5.86950799 | 0.35313374  |
| C | -0.53103512 | 6.23157804 | -4.63978795 |
| C | 5.46207461  | 4.77531064 | -0.34780499 |
| C | 0.04151789  | 5.13738070 | -5.34072668 |
| H | 1.49806846  | 9.01850473 | 0.62874854  |
| H | -0.30878390 | 9.13919476 | -1.03555880 |
| H | 5.23982338  | 1.86769393 | -3.95203414 |
| H | 3.43297102  | 1.98838395 | -5.61634148 |
| H | 5.36324921  | 6.24314286 | 1.26092192  |
| H | 6.37529717  | 4.30903342 | 0.02193864  |
| H | -1.44425769 | 6.69785526 | -5.00953158 |
| H | -0.43220973 | 4.76374583 | -6.24851486 |

|   |             |             |             |
|---|-------------|-------------|-------------|
| H | 3.60099349  | 7.94478393  | 1.48017637  |
| H | 6.33070054  | 2.72808237  | -1.86162315 |
| H | -1.39966106 | 8.27880631  | -3.12596979 |
| H | 1.33004599  | 3.06210475  | -6.46776932 |
| C | -4.10128486 | 2.41449923  | 4.83398753  |
| C | -3.39130479 | -0.04425112 | 6.06527731  |
| C | -4.96562602 | 1.29268227  | 4.72986666  |
| C | -2.88195366 | 2.30694101  | 5.55375328  |
| C | -4.61063599 | 0.06330710  | 5.34551156  |
| C | -2.52696363 | 1.07756583  | 6.16939818  |
| C | -4.45627489 | 3.64387440  | 4.21834263  |
| C | -6.18495721 | 1.40024049  | 4.01010091  |
| C | -2.01761250 | 3.42875796  | 5.65787415  |
| C | -3.03631476 | -1.27362629 | 6.68092221  |
| C | -5.47497715 | -1.05850985 | 5.24139069  |
| C | -1.30763244 | 0.97000761  | 6.88916393  |
| C | -6.53994725 | 2.62961567  | 3.39445601  |
| C | -2.37260253 | 4.65813314  | 5.04222925  |
| C | -5.11998712 | -2.28788503 | 5.85703559  |
| C | -0.95264241 | -0.25936756 | 7.50480883  |
| C | -5.67560610 | 3.75143267  | 3.49857685  |
| C | -3.59193374 | 4.76569141  | 4.32246347  |
| C | -3.90065591 | -2.39544330 | 6.57680137  |
| C | -1.81698355 | -1.38118457 | 7.40068799  |
| C | -7.04929817 | 0.27842364  | 3.90598012  |
| C | -0.79828151 | 3.32119964  | 6.37763982  |
| C | -6.69430814 | -0.95095154 | 4.52162502  |

|   |             |             |             |
|---|-------------|-------------|-------------|
| C | -0.44329148 | 2.09182447  | 6.99328472  |
| H | -5.94809843 | 4.69510794  | 3.02600438  |
| H | -3.86442608 | 5.70936667  | 3.84989100  |
| H | -3.62816357 | -3.33911856 | 7.04937384  |
| H | -1.54449122 | -2.32485983 | 7.87326046  |
| H | -7.98526376 | 0.36098592  | 3.35348382  |
| H | -7.35778136 | -1.81206462 | 4.44170124  |
| H | -0.13480829 | 4.18231273  | 6.45756360  |
| H | 0.49267410  | 2.00926218  | 7.54578101  |
| H | -7.47591264 | 2.71217810  | 2.84195977  |
| H | -5.78346012 | -3.14899806 | 5.77711191  |
| H | -1.70912953 | 5.51924617  | 5.12215293  |
| H | -0.01667701 | -0.34193000 | 8.05730507  |
| C | -3.51280218 | -1.91814381 | -7.09925853 |
| C | -3.89816685 | -1.61321808 | -4.30209677 |
| C | -4.28480011 | -2.86925386 | -6.38106013 |
| C | -2.93348659 | -0.81457088 | -6.41887604 |
| C | -4.47748245 | -2.71679100 | -4.98247926 |
| C | -3.12616893 | -0.66210802 | -5.02029516 |
| C | -3.32011985 | -2.07060667 | -8.49783940 |
| C | -4.86411570 | -3.97282679 | -7.06144262 |
| C | -2.16148866 | 0.13653918  | -7.13707444 |
| C | -4.09084919 | -1.46075521 | -2.90351589 |
| C | -5.24948038 | -3.66790106 | -4.26428086 |
| C | -2.54685333 | 0.44146491  | -4.33991268 |
| C | -4.67143337 | -4.12528965 | -8.46002349 |
| C | -1.96880633 | -0.01592369 | -8.53565531 |

|   |             |             |              |
|---|-------------|-------------|--------------|
| C | -5.44216271 | -3.51543819 | -2.86569998  |
| C | -2.73953567 | 0.59392777  | -2.94133180  |
| C | -3.89943543 | -3.17417960 | -9.17822195  |
| C | -2.54812191 | -1.11949662 | -9.21603786  |
| C | -4.86284713 | -2.41186526 | -2.18531744  |
| C | -3.51153361 | -0.35718228 | -2.22313335  |
| C | -5.63611350 | -4.92393665 | -6.34324423  |
| C | -1.58217320 | 1.24011190  | -6.45669195  |
| C | -5.82879584 | -4.77147378 | -4.94466335  |
| C | -1.77485554 | 1.39257476  | -5.05811107  |
| H | -3.75153139 | -3.29121095 | -10.25178045 |
| H | -2.40021787 | -1.23652797 | -10.28959636 |
| H | -5.01075117 | -2.29483391 | -1.11175893  |
| H | -3.65943764 | -0.24015093 | -1.14957484  |
| H | -6.08079946 | -5.77104552 | -6.86550969  |
| H | -6.42138585 | -5.50155130 | -4.39337018  |
| H | -0.98958318 | 1.97018941  | -7.00798512  |
| H | -1.33016957 | 2.23968364  | -4.53584561  |
| H | -5.11611919 | -4.97239834 | -8.98228901  |
| H | -6.03475261 | -4.24551550 | -2.31440676  |
| H | -1.37621643 | 0.71415362  | -9.08694854  |
| H | -2.29484985 | 1.44103645  | -2.41906628  |
| C | -5.55711850 | 2.24996421  | -4.80823721  |
| C | -7.08522533 | 0.47474633  | -3.20228249  |
| C | -5.69349662 | 2.49137702  | -3.41557036  |
| C | -6.18479380 | 1.12094246  | -5.39792670  |
| C | -6.45755003 | 1.60376808  | -2.61259301  |

|   |             |             |             |
|---|-------------|-------------|-------------|
| C | -6.94884721 | 0.23333352  | -4.59494934 |
| C | -4.79306509 | 3.13757314  | -5.61121457 |
| C | -5.06582133 | 3.62039877  | -2.82588088 |
| C | -6.04841568 | 0.87952964  | -6.79059354 |
| C | -7.84927874 | -0.41286261 | -2.39930514 |
| C | -6.59392815 | 1.84518089  | -1.21992616 |
| C | -7.57652250 | -0.89568823 | -5.18463883 |
| C | -4.30176792 | 4.50800771  | -3.62885823 |
| C | -5.28436227 | 1.76713858  | -7.59357090 |
| C | -7.35798156 | 0.95757196  | -0.41694881 |
| C | -8.34057591 | -1.78329717 | -4.38166147 |
| C | -4.16538977 | 4.26659493  | -5.02152511 |
| C | -4.65668694 | 2.89616037  | -7.00388144 |
| C | -7.98565689 | -0.17144983 | -1.00663826 |
| C | -8.47695406 | -1.54188439 | -2.98899459 |
| C | -5.20219949 | 3.86181145  | -1.43321423 |
| C | -6.67609093 | -0.24949197 | -7.38028284 |
| C | -5.96625291 | 2.97420251  | -0.63023687 |
| C | -7.44014434 | -1.13710091 | -6.57730548 |
| H | -3.57889809 | 4.94792852  | -5.63789503 |
| H | -4.07019527 | 3.57749396  | -7.62025136 |
| H | -8.57214856 | -0.85278342 | -0.39026835 |
| H | -9.06344574 | -2.22321798 | -2.37262468 |
| H | -4.72039237 | 4.72845498  | -0.98056519 |
| H | -6.07093752 | 3.15951238  | 0.43878214  |
| H | -6.57140631 | -0.43480184 | -8.44930185 |
| H | -7.92195147 | -2.00374444 | -7.02995451 |

|   |             |             |             |
|---|-------------|-------------|-------------|
| H | -3.81996080 | 5.37465114  | -3.17620943 |
| H | -7.46266625 | 1.14288165  | 0.65207005  |
| H | -5.17967758 | 1.58182888  | -8.66258975 |
| H | -8.82238303 | -2.64994060 | -4.83431027 |
| C | 0.91983885  | -5.31009599 | -3.67212443 |
| C | 1.41219802  | -5.95463258 | -0.95040539 |
| C | -0.16553299 | -5.59970910 | -2.80350928 |
| C | 2.25139027  | -5.34275118 | -3.17988007 |
| C | 0.08064659  | -5.92197740 | -1.44264976 |
| C | 2.49756986  | -5.66501947 | -1.81902055 |
| C | 0.67365926  | -4.98782769 | -5.03298396 |
| C | -1.49708442 | -5.56705391 | -3.29575364 |
| C | 3.33676211  | -5.05313807 | -4.04849523 |
| C | 1.65837760  | -6.27690088 | 0.41045413  |
| C | -1.00472525 | -6.21159051 | -0.57403460 |
| C | 3.82912128  | -5.69767466 | -1.32677618 |
| C | -1.74326401 | -5.24478562 | -4.65661316 |
| C | 3.09058253  | -4.73086977 | -5.40935475 |
| C | -0.75854567 | -6.53385880 | 0.78682492  |
| C | 4.07530087  | -6.01994296 | 0.03408334  |
| C | -0.65789217 | -4.95517249 | -5.52522838 |
| C | 1.75903109  | -4.69821457 | -5.90159917 |
| C | 0.57300577  | -6.56651400 | 1.27906934  |
| C | 2.98992904  | -6.30955608 | 0.90269855  |
| C | -2.58245603 | -5.85666700 | -2.42713852 |
| C | 4.66831331  | -5.08579328 | -3.55625082 |
| C | -2.33627644 | -6.17893530 | -1.06627900 |

|   |             |             |             |
|---|-------------|-------------|-------------|
| C | 4.91449289  | -5.40806158 | -2.19539130 |
| H | -0.84686100 | -4.70779755 | -6.56983176 |
| H | 1.57006227  | -4.45083962 | -6.94620255 |
| H | 0.76197460  | -6.81388895 | 2.32367272  |
| H | 3.17889786  | -6.55693103 | 1.94730193  |
| H | -3.60456250 | -5.83160070 | -2.80498809 |
| H | -3.16941407 | -6.40124397 | -0.39952507 |
| H | 5.50145094  | -4.86348461 | -4.22300476 |
| H | 5.93659937  | -5.43312788 | -1.81754174 |
| H | -2.76537026 | -5.21971928 | -5.03446282 |
| H | -1.59168305 | -6.75616746 | 1.45357887  |
| H | 3.92371991  | -4.50856111 | -6.07610870 |
| H | 5.09740712  | -6.04500930 | 0.41193300  |
| C | 2.30725535  | -2.35648499 | -0.54930107 |
| C | 3.88927039  | -1.55250734 | -2.76660752 |
| C | 3.71282159  | -2.21549025 | -0.40471859 |
| C | 1.69269662  | -2.09549090 | -1.80253678 |
| C | 4.50382911  | -1.81350142 | -1.51337181 |
| C | 2.48370414  | -1.69350208 | -2.91119000 |
| C | 1.51624783  | -2.75847381 | 0.55935215  |
| C | 4.32738031  | -2.47648433 | 0.84851712  |
| C | 0.28713038  | -2.23648565 | -1.94711927 |
| C | 4.68027791  | -1.15051852 | -3.87526074 |
| C | 5.90939535  | -1.67250668 | -1.36878932 |
| C | 1.86914542  | -1.43250800 | -4.16442571 |
| C | 3.53637279  | -2.87847315 | 1.95717034  |
| C | -0.50387714 | -2.63847447 | -0.83846605 |

|   |             |             |             |
|---|-------------|-------------|-------------|
| C | 6.70040287  | -1.27051786 | -2.47744255 |
| C | 2.66015294  | -1.03051918 | -5.27307894 |
| C | 2.13080652  | -3.01946791 | 1.81258790  |
| C | 0.11068155  | -2.89946857 | 0.41476971  |
| C | 6.08584418  | -1.00952376 | -3.73067830 |
| C | 4.06571922  | -0.88952442 | -5.12849650 |
| C | 5.73294636  | -2.33548958 | 0.99309947  |
| C | -0.32742815 | -1.97549157 | -3.20035484 |
| C | 6.52395388  | -1.93350075 | -0.11555375 |
| C | 0.46357937  | -1.57350275 | -4.30900806 |
| H | 1.52362472  | -3.32803678 | 2.66359632  |
| H | -0.49650025 | -3.20803744 | 1.26577813  |
| H | 6.69302598  | -0.70095489 | -4.58168672 |
| H | 4.67290102  | -0.58095555 | -5.97950491 |
| H | 6.20468516  | -2.53583012 | 1.95509034  |
| H | 7.60287454  | -1.82527239 | -0.00457139 |
| H | -1.40634881 | -2.08371994 | -3.31133720 |
| H | -0.00815943 | -1.37316221 | -5.27099893 |
| H | 4.00811136  | -3.07881370 | 2.91916113  |
| H | 7.77932337  | -1.16228947 | -2.36646037 |
| H | -1.58279764 | -2.74670286 | -0.94944822 |
| H | 2.18841437  | -0.83017863 | -6.23506972 |
| C | 2.70877354  | 3.41798277  | 1.91832994  |
| C | 0.35675551  | 4.74848519  | 1.04461717  |
| C | 2.15535259  | 4.46749536  | 2.69848932  |
| C | 2.08618548  | 3.03372140  | 0.70131417  |
| C | 0.97934357  | 5.13274656  | 2.26163294  |



|   |             |            |             |
|---|-------------|------------|-------------|
| C | 0.91017646  | 3.69897260 | 0.26445779  |
| C | 3.88478256  | 2.75273157 | 2.35518633  |
| C | 2.77794065  | 4.85175673 | 3.91550509  |
| C | 2.63960644  | 1.98420882 | -0.07884521 |
| C | -0.81925351 | 5.41373639 | 0.60776079  |
| C | 0.42592261  | 6.18225914 | 3.04179232  |
| C | 0.28758840  | 3.31471123 | -0.95255798 |
| C | 3.95394967  | 4.18650553 | 4.35236148  |
| C | 3.81561546  | 1.31895761 | 0.35801118  |
| C | -0.75008641 | 6.84751035 | 2.60493593  |
| C | -0.88842061 | 3.97996243 | -1.38941436 |
| C | 4.50737067  | 3.13699292 | 3.57220211  |
| C | 4.43820357  | 1.70321896 | 1.57502696  |
| C | -1.37267452 | 6.46324900 | 1.38792015  |
| C | -1.44184162 | 5.02947504 | -0.60925500 |
| C | 2.22451968  | 5.90126918 | 4.69566428  |
| C | 2.01701838  | 1.59994758 | -1.29586078 |
| C | 1.04851067  | 6.56652038 | 4.25880789  |
| C | 0.84100937  | 2.26519878 | -1.73271717 |
| H | 5.41008178  | 2.62634237 | 3.90753552  |
| H | 5.34091467  | 1.19256841 | 1.91036037  |
| H | -2.27538562 | 6.97389955 | 1.05258674  |
| H | -2.34455272 | 5.54012559 | -0.94458841 |
| H | 2.70242182  | 6.19623041 | 5.62985253  |
| H | 0.62370160  | 7.37213222 | 4.85766270  |
| H | 2.44182745  | 0.79433574 | -1.89471559 |
| H | 0.36310723  | 1.97023755 | -2.66690541 |

|   |             |             |             |
|---|-------------|-------------|-------------|
| H | 4.43185184  | 4.48146660  | 5.28654955  |
| H | -1.17489553 | 7.65312208  | 3.20379053  |
| H | 4.24042458  | 0.51334588  | -0.24084341 |
| H | -1.36632279 | 3.68500136  | -2.32360244 |
| C | -2.00131499 | -0.59043489 | 2.81419300  |
| C | -1.00529498 | -2.92543090 | 4.08751044  |
| C | -2.73882397 | -1.80231541 | 2.75233679  |
| C | -0.76579600 | -0.54605238 | 3.51270793  |
| C | -2.24081397 | -2.96981341 | 3.38899550  |
| C | -0.26778600 | -1.71355038 | 4.14936665  |
| C | -2.49932499 | 0.57706312  | 2.17753428  |
| C | -3.97434295 | -1.84669792 | 2.05382185  |
| C | -0.02828702 | 0.66582814  | 3.57456414  |
| C | -0.50728498 | -4.09292890 | 4.72416916  |
| C | -2.97832295 | -4.18169393 | 3.32713929  |
| C | 0.96773298  | -1.66916787 | 4.84788158  |
| C | -4.47235296 | -0.67919992 | 1.41716313  |
| C | -0.52629703 | 1.83332615  | 2.93790542  |
| C | -2.48031294 | -5.34919193 | 3.96379801  |
| C | 1.46574299  | -2.83666587 | 5.48454030  |
| C | -3.73484400 | 0.53268065  | 1.47901932  |
| C | -1.76181603 | 1.78894368  | 2.23939046  |
| C | -1.24479394 | -5.30480947 | 4.66231297  |
| C | 0.72823403  | -4.04854644 | 5.42268411  |
| C | -4.71185174 | -3.05857832 | 1.99196572  |
| C | 1.20723177  | 0.71021053  | 4.27307900  |
| C | -4.21384174 | -4.22607632 | 2.62862444  |

|   |             |             |            |
|---|-------------|-------------|------------|
| C | 1.70524177  | -0.45728747 | 4.90973772 |
| H | -4.11711926 | 1.42885865  | 0.99031652 |
| H | -2.14409130 | 2.68512168  | 1.75068767 |
| H | -0.86251867 | -6.20098747 | 5.15101577 |
| H | 1.11050929  | -4.94472444 | 5.91138691 |
| H | -5.66024316 | -3.09264660 | 1.45578168 |
| H | -4.77995785 | -5.15632271 | 2.58114325 |
| H | 1.77334788  | 1.64045692  | 4.32056019 |
| H | 2.65363319  | -0.42321918 | 5.44592176 |
| H | -5.42074421 | -0.71326803 | 0.88097914 |
| H | -3.04642885 | -6.27943825 | 3.91631692 |
| H | 0.03981888  | 2.76357246  | 2.98538651 |
| H | 2.41413424  | -2.80259775 | 6.02072429 |
| K | 0.20465800  | 0.10074000  | 0.48149700 |

325

n = 9, Energy = -919.12833236

|   |             |            |            |
|---|-------------|------------|------------|
| C | -2.19700552 | 8.23173874 | 3.23078270 |
| C | -3.04064911 | 5.58544942 | 2.63831512 |
| C | -3.20478479 | 7.61474617 | 4.01824774 |
| C | -1.61104804 | 7.52558666 | 2.14708388 |
| C | -3.62660659 | 6.29160151 | 3.72201395 |
| C | -2.03286984 | 6.20244200 | 1.85085009 |
| C | -1.77518372 | 9.55488340 | 3.52701649 |
| C | -3.79074226 | 8.32089826 | 5.10194657 |
| C | -0.60326877 | 8.14257923 | 1.35961884 |
| C | -3.46247091 | 4.26230476 | 2.34208133 |
| C | -4.63438586 | 5.67460894 | 4.50947899 |

|   |             |             |             |
|---|-------------|-------------|-------------|
| C | -1.44691237 | 5.49628991  | 0.76715126  |
| C | -3.36892046 | 9.64404292  | 5.39818036  |
| C | -0.18144698 | 9.46572389  | 1.65585263  |
| C | -5.05620765 | 4.35146428  | 4.21324520  |
| C | -1.86873417 | 4.17314525  | 0.47091747  |
| C | -2.36114117 | 10.26103555 | 4.61071533  |
| C | -0.76740443 | 10.17187603 | 2.73955147  |
| C | -4.47025020 | 3.64531214  | 3.12954636  |
| C | -2.87651346 | 3.55615262  | 1.25838249  |
| C | -4.79852138 | 7.70390568  | 5.88941142  |
| C | -0.01731146 | 7.43642715  | 0.27592019  |
| C | -5.22034317 | 6.38076102  | 5.59317763  |
| C | -0.43913325 | 6.11328249  | -0.02031360 |
| H | -2.03734840 | 11.27668879 | 4.83810605  |
| H | -0.44361166 | 11.18752928 | 2.96694218  |
| H | -4.79404297 | 2.62965889  | 2.90215564  |
| H | -3.20030623 | 2.54049938  | 1.03099178  |
| H | -5.24830568 | 8.24595203  | 6.72126483  |
| H | -5.99392029 | 5.90715401  | 6.19764030  |
| H | 0.75626566  | 7.91003415  | -0.32854247 |
| H | 0.01065106  | 5.57123614  | -0.85216700 |
| H | -3.81870460 | 10.18608932 | 6.23003359  |
| H | -5.82978463 | 3.87785721  | 4.81770767  |
| H | 0.59213000  | 9.93933096  | 1.05139016  |
| H | -1.41895003 | 3.63109885  | -0.36093577 |
| C | -7.22517196 | 6.29359959  | -3.54317148 |
| C | -5.77353665 | 4.90167053  | -5.54838667 |

|   |             |            |             |
|---|-------------|------------|-------------|
| C | -6.16859671 | 6.94308390 | -4.23470525 |
| C | -7.55592956 | 4.94815076 | -3.85424531 |
| C | -5.44277906 | 6.24711937 | -5.23731285 |
| C | -6.83011190 | 4.25218623 | -4.85685290 |
| C | -7.95098962 | 6.98956412 | -2.54056389 |
| C | -5.83783912 | 8.28853273 | -3.92363143 |
| C | -8.61250480 | 4.29866645 | -3.16271154 |
| C | -5.04771899 | 4.20570601 | -6.55099426 |
| C | -4.38620381 | 6.89660368 | -5.92884662 |
| C | -7.16086949 | 2.90673739 | -5.16792672 |
| C | -6.56365678 | 8.98449726 | -2.92102384 |
| C | -9.33832246 | 4.99463098 | -2.16010395 |
| C | -3.66038615 | 6.20063915 | -6.93145421 |
| C | -6.43505184 | 2.21077286 | -6.17053431 |
| C | -7.62023206 | 8.33501298 | -2.22949003 |
| C | -9.00756490 | 6.34007984 | -1.84903008 |
| C | -3.99114371 | 4.85519028 | -7.24252807 |
| C | -5.37847656 | 2.86025714 | -6.86206812 |
| C | -4.78126401 | 8.93801685 | -4.61516516 |
| C | -8.94326226 | 2.95321781 | -3.47378540 |
| C | -4.05544635 | 8.24205232 | -5.61777276 |
| C | -8.21744461 | 2.25725328 | -4.47639299 |
| H | -8.17737375 | 8.86923925 | -1.45988283 |
| H | -9.56470659 | 6.87430611 | -1.07942288 |
| H | -3.43400202 | 4.32096402 | -8.01213527 |
| H | -4.82133486 | 2.32603088 | -7.63167532 |
| H | -4.52737258 | 9.97079105 | -4.37638314 |

|   |              |             |             |
|---|--------------|-------------|-------------|
| H | -3.24441317  | 8.74060019  | -6.14859801 |
| H | -9.75429545  | 2.45466993  | -2.94296014 |
| H | -8.47133603  | 1.22447908  | -4.71517502 |
| H | -6.30976552  | 10.01727130 | -2.68224173 |
| H | -2.84935307  | 6.69918680  | -7.46227947 |
| H | -10.14935554 | 4.49608332  | -1.62927868 |
| H | -6.68894310  | 1.17799883  | -6.40931642 |
| C | -6.45770433  | 5.56944873  | 0.71584215  |
| C | -4.40315757  | 6.85098871  | -0.76810273 |
| C | -6.07636316  | 6.89979473  | 1.03389640  |
| C | -5.81177212  | 4.87987272  | -0.34418454 |
| C | -5.04908978  | 7.54056472  | 0.29192396  |
| C | -4.78449874  | 5.52064271  | -1.08615698 |
| C | -7.48497771  | 4.92867874  | 1.45781459  |
| C | -6.72229537  | 7.58937074  | 2.09392309  |
| C | -6.19311329  | 3.54952672  | -0.66223879 |
| C | -3.37588419  | 7.49175871  | -1.51007517 |
| C | -4.66774861  | 8.87091072  | 0.60997821  |
| C | -4.13856653  | 4.83106670  | -2.14618367 |
| C | -7.74956875  | 6.94860075  | 2.83589553  |
| C | -7.22038667  | 2.90875673  | 0.07973365  |
| C | -3.64047524  | 9.51168072  | -0.13199423 |
| C | -3.11129315  | 5.47183669  | -2.88815611 |
| C | -8.13090996  | 5.61825472  | 2.51784131  |
| C | -7.86631892  | 3.59833271  | 1.13976037  |
| C | -2.99454298  | 8.82210473  | -1.19202095 |
| C | -2.72995194  | 6.80218272  | -2.57010189 |

|   |             |             |             |
|---|-------------|-------------|-------------|
| C | -6.34095418 | 8.91971655  | 2.41197721  |
| C | -5.54718110 | 2.85995091  | -1.72226535 |
| C | -5.31368080 | 9.56048654  | 1.67000477  |
| C | -4.51990772 | 3.50072090  | -2.46423779 |
| H | -8.91945076 | 5.12639609  | 3.08738351  |
| H | -8.65485972 | 3.10647408  | 1.70930257  |
| H | -2.20600219 | 9.31396337  | -1.76156315 |
| H | -1.94141114 | 7.29404135  | -3.13964409 |
| H | -6.83677542 | 9.44903904  | 3.22565974  |
| H | -5.02096116 | 10.58166772 | 1.91414504  |
| H | -5.83990075 | 1.83876973  | -1.96640562 |
| H | -4.02408649 | 2.97139840  | -3.27792032 |
| H | -8.24539001 | 7.47792302  | 3.64957796  |
| H | -3.34775552 | 10.53286173 | 0.11214588  |
| H | -7.51310638 | 1.88757572  | -0.16440646 |
| H | -2.61547190 | 4.94251442  | -3.70183854 |
| C | -3.18616319 | -1.66203970 | 2.08722142  |
| C | -1.13248350 | -3.62044905 | 1.97482909  |
| C | -2.93710579 | -2.49491478 | 3.21002576  |
| C | -2.40838074 | -1.80836929 | 0.90822091  |
| C | -1.91026594 | -3.47411946 | 3.15382959  |
| C | -1.38154090 | -2.78757397 | 0.85202475  |
| C | -4.21300304 | -0.68283502 | 2.14341758  |
| C | -3.71488824 | -2.34858519 | 4.38902626  |
| C | -2.65743814 | -0.97549421 | -0.21458343 |
| C | -0.10564365 | -4.59965373 | 1.91863292  |
| C | -1.66120855 | -4.30699454 | 4.27663393  |

|   |             |             |             |
|---|-------------|-------------|-------------|
| C | -0.60375845 | -2.93390356 | -0.32697576 |
| C | -4.74172809 | -1.36938051 | 4.44522243  |
| C | -3.68427799 | 0.00371047  | -0.15838726 |
| C | -0.63436870 | -5.28619922 | 4.22043776  |
| C | 0.42308140  | -3.91310824 | -0.38317192 |
| C | -4.99078553 | -0.53650539 | 3.32241809  |
| C | -4.46206048 | 0.15004010  | 1.02061325  |
| C | 0.14341379  | -5.43252885 | 3.04143726  |
| C | 0.67213884  | -4.74598336 | 0.73963241  |
| C | -3.46583079 | -3.18146021 | 5.51183038  |
| C | -1.87965574 | -1.12182387 | -1.39358371 |
| C | -2.43899094 | -4.16066488 | 5.45563421  |
| C | -0.85281590 | -2.10102854 | -1.44977987 |
| H | -5.77899354 | 0.21513760  | 3.36555458  |
| H | -5.25026849 | 0.90168309  | 1.06374974  |
| H | 0.93162181  | -6.18417184 | 2.99830076  |
| H | 1.46034685  | -5.49762635 | 0.69649592  |
| H | -4.06286102 | -3.06913679 | 6.41683790  |
| H | -2.24781308 | -4.79998454 | 6.31750524  |
| H | -2.07083361 | -0.48250421 | -2.25545473 |
| H | -0.25578566 | -2.21335196 | -2.35478740 |
| H | -5.33875831 | -1.25705699 | 5.35022973  |
| H | -0.44319074 | -5.92551885 | 5.08230856  |
| H | -3.87545595 | 0.64303010  | -1.02025806 |
| H | 1.02011162  | -4.02543176 | -1.28817922 |
| C | 4.02782353  | 2.38738329  | -4.13560706 |
| C | 1.89048022  | 3.97021961  | -5.13159516 |



|   |             |             |             |
|---|-------------|-------------|-------------|
| C | 3.30544574  | 1.96415660  | -5.28253756 |
| C | 3.68152967  | 3.60202815  | -3.48667062 |
| C | 2.23677408  | 2.75557476  | -5.78053161 |
| C | 2.61285801  | 4.39344631  | -3.98466467 |
| C | 5.09649518  | 1.59596514  | -3.63761301 |
| C | 3.65173960  | 0.74951174  | -5.93147401 |
| C | 4.40390746  | 4.02525485  | -2.33974012 |
| C | 0.82180857  | 4.76163777  | -5.62958921 |
| C | 1.51439629  | 2.33234806  | -6.92746211 |
| C | 2.26656415  | 5.60809117  | -3.33572822 |
| C | 4.72041125  | -0.04190642 | -5.43347996 |
| C | 5.47257911  | 3.23383669  | -1.84174607 |
| C | 0.44572464  | 3.12376622  | -7.42545616 |
| C | 1.19789250  | 6.39950932  | -3.83372227 |
| C | 5.44278909  | 0.38132025  | -4.28654944 |
| C | 5.81887302  | 2.01919180  | -2.49068249 |
| C | 0.09943073  | 4.33841111  | -6.77651973 |
| C | 0.47551466  | 5.97628266  | -4.98065279 |
| C | 2.92936184  | 0.32628520  | -7.07840433 |
| C | 4.05761356  | 5.23989954  | -1.69080384 |
| C | 1.86069019  | 1.11770336  | -7.57639838 |
| C | 2.98894191  | 6.03131770  | -2.18879789 |
| H | 6.26310743  | -0.22617676 | -3.90428642 |
| H | 6.63919136  | 1.41169479  | -2.10841947 |
| H | -0.72088761 | 4.94590812  | -7.15878275 |
| H | -0.34480368 | 6.58377967  | -5.36291581 |
| H | 3.19517897  | -0.60608311 | -7.57653166 |

|   |             |             |             |
|---|-------------|-------------|-------------|
| H | 1.30618889  | 0.79283212  | -8.45678877 |
| H | 4.61211486  | 5.56477079  | -0.81041345 |
| H | 2.72312478  | 6.96368602  | -1.69067056 |
| H | 4.98622846  | -0.97427461 | -5.93160709 |
| H | -0.10877667 | 2.79889517  | -8.30584640 |
| H | 6.02708042  | 3.55870774  | -0.96135583 |
| H | 0.93207529  | 7.33187752  | -3.33559513 |
| C | -3.97782281 | -3.79873541 | -2.16278269 |
| C | -5.64897357 | -3.49826827 | 0.11374408  |
| C | -3.80125547 | -4.64441326 | -1.03581640 |
| C | -4.98996554 | -2.80282399 | -2.15148560 |
| C | -4.63683085 | -4.49417969 | 0.10244699  |
| C | -5.82554092 | -2.65259042 | -1.01322221 |
| C | -3.14224743 | -3.94896898 | -3.30104608 |
| C | -2.78911274 | -5.64032467 | -1.04711349 |
| C | -5.16653289 | -1.95714615 | -3.27845189 |
| C | -6.48454895 | -3.34803470 | 1.25200747  |
| C | -4.46026350 | -5.33985754 | 1.22941328  |
| C | -6.83768365 | -1.65667901 | -1.00192512 |
| C | -1.95353736 | -5.79055824 | -2.18537688 |
| C | -4.33095751 | -2.10737971 | -4.41671528 |
| C | -5.29583888 | -5.18962397 | 2.36767667  |
| C | -7.67325903 | -1.50644544 | 0.13633827  |
| C | -2.13010467 | -4.94488040 | -3.31234322 |
| C | -3.31881475 | -3.10329114 | -4.42801242 |
| C | -6.30798164 | -4.19371254 | 2.37897381  |
| C | -7.49669172 | -2.35212328 | 1.26330461  |

|   |             |             |             |
|---|-------------|-------------|-------------|
| C | -2.61254550 | -6.48600234 | 0.07985269  |
| C | -6.17867550 | -0.96123491 | -3.26715469 |
| C | -3.44812088 | -6.33576877 | 1.21811608  |
| C | -7.01425088 | -0.81100134 | -2.12889130 |
| H | -1.48871233 | -5.06020053 | -4.18608056 |
| H | -2.67742241 | -3.21861127 | -5.30174976 |
| H | -6.94937398 | -4.07839242 | 3.25271116  |
| H | -8.13808406 | -2.23680315 | 2.13704196  |
| H | -1.83561898 | -7.25046963 | 0.07118100  |
| H | -3.31258677 | -6.98491592 | 2.08318183  |
| H | -6.31420962 | -0.31208776 | -4.13222043 |
| H | -7.79117741 | -0.04653405 | -2.12021961 |
| H | -1.17661091 | -6.55502536 | -2.19404873 |
| H | -5.16030491 | -5.83877093 | 3.23274235  |
| H | -4.46649148 | -1.45823275 | -5.28178096 |
| H | -8.45018548 | -0.74197832 | 0.14501012  |
| C | -0.05587762 | 3.07500392  | 6.45376911  |
| C | 2.39770490  | 1.64518022  | 6.42005657  |
| C | 1.16766179  | 3.76894232  | 6.25934464  |
| C | -0.05262577 | 1.66615366  | 6.63133732  |
| C | 2.39445305  | 3.05403048  | 6.24248836  |
| C | 1.17416549  | 0.95124182  | 6.61448105  |
| C | -1.28266888 | 3.78991576  | 6.47062539  |
| C | 1.16440994  | 5.17779257  | 6.08177643  |
| C | -1.27616518 | 0.97221526  | 6.82576180  |
| C | 3.62449616  | 0.93026838  | 6.40320030  |
| C | 3.61799246  | 3.74796888  | 6.04806388  |

|   |             |             |            |
|---|-------------|-------------|------------|
| C | 1.17741734  | -0.45760844 | 6.79204925 |
| C | -0.06238132 | 5.89270442  | 6.09863270 |
| C | -2.50295644 | 1.68712710  | 6.84261807 |
| C | 4.84478372  | 3.03305703  | 6.03120761 |
| C | 2.40420860  | -1.17252028 | 6.77519298 |
| C | -1.28592079 | 5.19876605  | 6.29305718 |
| C | -2.50620834 | 3.09597739  | 6.66504987 |
| C | 4.84803562  | 1.62420675  | 6.20877582 |
| C | 3.62774806  | -0.47858191 | 6.58076850 |
| C | 2.38794923  | 5.87173078  | 5.88735199 |
| C | -1.27291321 | -0.43663479 | 7.00332997 |
| C | 3.61474049  | 5.15681893  | 5.87049571 |
| C | -0.04612195 | -1.15154664 | 6.98647370 |
| H | -2.22761262 | 5.74753638  | 6.30599615 |
| H | -3.44790018 | 3.64474772  | 6.67798884 |
| H | 5.78972745  | 1.07543642  | 6.19583685 |
| H | 4.56943990  | -1.02735224 | 6.56782953 |
| H | 2.38545311  | 6.95317227  | 5.75104962 |
| H | 4.55393631  | 5.68949002  | 5.72125437 |
| H | -2.21210903 | -0.96930589 | 7.15257131 |
| H | -0.04362583 | -2.23298813 | 7.12277607 |
| H | -0.06487761 | 6.97414574  | 5.96233037 |
| H | 5.78397947  | 3.56572790  | 5.88196631 |
| H | -3.44215220 | 1.15445624  | 6.99185938 |
| H | 2.40670489  | -2.25396160 | 6.91149531 |
| C | 3.66880711  | -0.01981553 | 2.82714917 |
| C | 3.00455626  | 2.73159890  | 2.59457890 |

|   |             |             |            |
|---|-------------|-------------|------------|
| C | 4.68026272  | 0.93233148  | 2.53257545 |
| C | 2.32522607  | 0.40374467  | 3.00543775 |
| C | 4.34813730  | 2.30803870  | 2.41629031 |
| C | 1.99310064  | 1.77945188  | 2.88915261 |
| C | 4.00093254  | -1.39552275 | 2.94343430 |
| C | 6.02384377  | 0.50877129  | 2.35428687 |
| C | 1.31377046  | -0.54840235 | 3.30001146 |
| C | 2.67243083  | 4.10730612  | 2.47829376 |
| C | 5.35959291  | 3.26018572  | 2.12171660 |
| C | 0.64951960  | 2.20301208  | 3.06744120 |
| C | 6.35596919  | -0.86693593 | 2.47057200 |
| C | 1.64589588  | -1.92410957 | 3.41629660 |
| C | 5.02746748  | 4.63589294  | 2.00543146 |
| C | 0.31739417  | 3.57871930  | 2.95115606 |
| C | 5.34451359  | -1.81908301 | 2.76514572 |
| C | 2.98947694  | -2.34766983 | 3.23800802 |
| C | 3.68388643  | 5.05945319  | 2.18372004 |
| C | 1.32884977  | 4.53086637  | 2.65658234 |
| C | 7.03529915  | 1.46091825  | 2.05971319 |
| C | -0.02981036 | -0.12484210 | 3.47830000 |
| C | 6.70317372  | 2.83662547  | 1.94342806 |
| C | -0.36193579 | 1.25086511  | 3.36201487 |
| H | 5.59945493  | -2.87508357 | 2.85440684 |
| H | 3.24441828  | -3.40367038 | 3.32726914 |
| H | 3.42894509  | 6.11545375  | 2.09445892 |
| H | 1.07390843  | 5.58686693  | 2.56732122 |
| H | 8.06663963  | 1.13579105  | 1.92285786 |

|   |             |             |             |
|---|-------------|-------------|-------------|
| H | 7.47957284  | 3.56749894  | 1.71731159  |
| H | -0.80620947 | -0.85571557 | 3.70441647  |
| H | -1.39327626 | 1.57599232  | 3.49887020  |
| H | 7.38730946  | -1.19206325 | 2.33371671  |
| H | 5.80386635  | 5.36676641  | 1.77931504  |
| H | 0.86949701  | -2.65498304 | 3.64241302  |
| H | -0.71394609 | 3.90384661  | 3.08801135  |
| C | 0.25558686  | 0.03712800  | -4.19149806 |
| C | 2.36474783  | -1.49690342 | -3.06731521 |
| C | 0.58780658  | -1.22709517 | -4.74626820 |
| C | 0.97794762  | 0.53433546  | -3.07463650 |
| C | 1.64238707  | -1.99411088 | -4.18417677 |
| C | 2.03252811  | -0.23268025 | -2.51254508 |
| C | -0.79899363 | 0.80414371  | -4.75358949 |
| C | -0.13455419 | -1.72430264 | -5.86312975 |
| C | 0.64572790  | 1.79855864  | -2.51986637 |
| C | 3.41932832  | -2.26391913 | -2.50522379 |
| C | 1.97460679  | -3.25833406 | -4.73894691 |
| C | 2.75488888  | 0.26452721  | -1.39568352 |
| C | -1.18913468 | -0.95728693 | -6.42522118 |
| C | -0.40885259 | 2.56557435  | -3.08195779 |
| C | 3.02918728  | -4.02534977 | -4.17685548 |
| C | 3.80946937  | -0.50248850 | -0.83359210 |
| C | -1.52135445 | 0.30693628  | -5.87045107 |
| C | -1.13121340 | 2.06836692  | -4.19881938 |
| C | 3.75154809  | -3.52814234 | -3.05999390 |
| C | 4.14168914  | -1.76671170 | -1.38836221 |

|   |             |             |             |
|---|-------------|-------------|-------------|
| C | 0.19766557  | -2.98852564 | -6.41789972 |
| C | 1.36808863  | 2.29576593  | -1.40300498 |
| C | 1.25224606  | -3.75554135 | -5.85580830 |
| C | 2.42266912  | 1.52875022  | -0.84091355 |
| H | -2.33085633 | 0.89570183  | -6.30191559 |
| H | -1.94071529 | 2.65713247  | -4.63028390 |
| H | 4.56104998  | -4.11690789 | -2.62852938 |
| H | 4.95119102  | -2.35547725 | -0.95689769 |
| H | -0.35682266 | -3.37018494 | -7.27520903 |
| H | 1.50725980  | -4.72596626 | -6.28165303 |
| H | 1.11307489  | 3.26619084  | -0.97716024 |
| H | 2.97715735  | 1.91040952  | 0.01639575  |
| H | -1.74362292 | -1.33894602 | -7.28253034 |
| H | 3.28420110  | -4.99577454 | -4.60270003 |
| H | -0.66386641 | 3.53599912  | -2.65611325 |
| H | 4.36395761  | -0.12082940 | 0.02371706  |
| K | 0.20465800  | 0.10074000  | 0.48149700  |

361

n = 10, Energy = -1008.16354118

|   |             |            |             |
|---|-------------|------------|-------------|
| C | 8.73889259  | 3.89622402 | -2.93825304 |
| C | 9.04645268  | 5.83826699 | -0.88899088 |
| C | 9.59005900  | 3.63295306 | -1.83253869 |
| C | 8.04150622  | 5.13051646 | -3.01933631 |
| C | 9.74383905  | 4.60397455 | -0.80790761 |
| C | 8.19528626  | 6.10153795 | -1.99470523 |
| C | 8.58511255  | 2.92520253 | -3.96288411 |
| C | 10.28744537 | 2.39866062 | -1.75145541 |

|   |             |            |             |
|---|-------------|------------|-------------|
| C | 7.19033981  | 5.39378741 | -4.12505066 |
| C | 9.20023272  | 6.80928848 | 0.13564020  |
| C | 10.59500546 | 4.34070360 | 0.29780674  |
| C | 7.49789989  | 7.33583039 | -2.07578850 |
| C | 10.13366533 | 1.42763913 | -2.77608649 |
| C | 7.03655977  | 4.42276592 | -5.14968173 |
| C | 10.74878550 | 5.31172509 | 1.32243782  |
| C | 7.65167993  | 8.30685188 | -1.05115743 |
| C | 9.28249892  | 1.69091004 | -3.88180088 |
| C | 7.73394614  | 3.18847344 | -5.06859851 |
| C | 10.05139913 | 6.54601757 | 1.24135459  |
| C | 8.50284635  | 8.04358097 | 0.05455697  |
| C | 11.13861164 | 2.13538982 | -0.64574118 |
| C | 6.49295359  | 6.62807970 | -4.20613382 |
| C | 11.29239168 | 3.10641131 | 0.37888990  |
| C | 6.64673363  | 7.59910119 | -3.18150274 |
| H | 9.16445650  | 0.94554851 | -4.66831343 |
| H | 7.61590372  | 2.44311191 | -5.85511105 |
| H | 10.16944155 | 7.29137910 | 2.02786714  |
| H | 8.62088877  | 8.78894250 | 0.84106952  |
| H | 11.67392940 | 1.18793990 | -0.58350118 |
| H | 11.94575187 | 2.90432300 | 1.22764253  |
| H | 5.83959340  | 6.83016800 | -5.05488645 |
| H | 6.11141587  | 8.54655111 | -3.24374274 |
| H | 10.66898294 | 0.48018933 | -2.71384665 |
| H | 11.40214555 | 5.10963698 | 2.17119038  |
| H | 6.38319972  | 4.62485403 | -5.99843430 |



|   |             |             |             |
|---|-------------|-------------|-------------|
| H | 7.11636233  | 9.25430168  | -1.11339727 |
| C | 0.09490659  | -0.39439295 | 9.40118260  |
| C | 1.68623459  | -0.24188962 | 7.05383997  |
| C | 1.32453452  | -1.10102448 | 9.32985846  |
| C | -0.33905733 | 0.38849024  | 8.29883543  |
| C | 2.12019852  | -1.02477281 | 8.15618715  |
| C | 0.45660667  | 0.46474190  | 7.12516411  |
| C | -0.70075741 | -0.47064462 | 10.57485392 |
| C | 1.75849844  | -1.88390767 | 10.43220564 |
| C | -1.56868526 | 1.09512176  | 8.37015956  |
| C | 2.48189859  | -0.16563795 | 5.88016865  |
| C | 3.34982644  | -1.73140433 | 8.08486301  |
| C | 0.02264274  | 1.24762509  | 6.02281693  |
| C | 0.96283444  | -1.96015933 | 11.60587696 |
| C | -2.36434926 | 1.01887009  | 9.54383088  |
| C | 4.14549044  | -1.65515266 | 6.91119169  |
| C | 0.81830674  | 1.32387676  | 4.84914561  |
| C | -0.26679352 | -1.25352781 | 11.67720115 |
| C | -1.93038537 | 0.23598690  | 10.64617811 |
| C | 3.71152655  | -0.87226947 | 5.80884447  |
| C | 2.04793470  | 0.61724524  | 4.77782143  |
| C | 2.98812621  | -2.59053904 | 10.36088140 |
| C | -2.00264902 | 1.87800480  | 7.26781249  |
| C | 3.78379021  | -2.51428738 | 9.18721009  |
| C | -1.20698502 | 1.95425647  | 6.09414117  |
| H | -0.87754966 | -1.31205902 | 12.57811782 |
| H | -2.54114151 | 0.17745569  | 11.54709478 |

|   |             |             |             |
|---|-------------|-------------|-------------|
| H | 4.32228269  | -0.81373827 | 4.90792779  |
| H | 2.65869084  | 0.67577645  | 3.87690476  |
| H | 3.32123941  | -3.19148465 | 11.20704937 |
| H | 4.72765961  | -3.05670177 | 9.13246129  |
| H | -2.94651843 | 2.42041920  | 7.32256128  |
| H | -1.54009822 | 2.55520208  | 5.24797320  |
| H | 1.29594745  | -2.56110480 | 12.45204488 |
| H | 5.08935972  | -2.19756691 | 6.85644275  |
| H | -3.30821854 | 1.56128434  | 9.59857983  |
| H | 0.48519374  | 1.92482223  | 4.00297769  |
| C | 4.91018656  | 7.35925904  | 4.81625165  |
| C | 3.49713209  | 7.26013762  | 7.27776573  |
| C | 3.63960013  | 7.98280607  | 4.93113985  |
| C | 5.47424575  | 6.68615130  | 5.93212049  |
| C | 2.93307289  | 7.93324536  | 6.16189689  |
| C | 4.76771852  | 6.63659058  | 7.16287753  |
| C | 5.61671379  | 7.40881975  | 3.58549462  |
| C | 3.07554093  | 8.65591382  | 3.81527102  |
| C | 6.74483218  | 6.06260426  | 5.81723229  |
| C | 2.79060486  | 7.21057691  | 8.50852276  |
| C | 1.66248647  | 8.55679240  | 6.27678509  |
| C | 5.33177772  | 5.96348284  | 8.27874637  |
| C | 3.78206816  | 8.70547453  | 2.58451398  |
| C | 7.45135941  | 6.11216497  | 4.58647526  |
| C | 0.95595923  | 8.50723169  | 7.50754213  |
| C | 4.62525048  | 5.91392213  | 9.50950340  |
| C | 5.05265462  | 8.08192750  | 2.46962573  |

|   |             |            |             |
|---|-------------|------------|-------------|
| C | 6.88730025  | 6.78527272 | 3.47060637  |
| C | 1.52001840  | 7.83412394 | 8.62341102  |
| C | 3.35466403  | 6.53746916 | 9.62439165  |
| C | 1.80495468  | 9.27946073 | 3.93015931  |
| C | 7.30889120  | 5.38949664 | 6.93310103  |
| C | 1.09842745  | 9.22990002 | 5.16091635  |
| C | 6.60236397  | 5.33993593 | 8.16385807  |
| H | 5.59498888  | 8.11997058 | 1.52488974  |
| H | 7.42963450  | 6.82331580 | 2.52587038  |
| H | 0.97768414  | 7.79608086 | 9.56814701  |
| H | 2.81232977  | 6.49942608 | 10.56912764 |
| H | 1.37197961  | 9.79614208 | 3.07361204  |
| H | 0.12311806  | 9.70853828 | 5.24910517  |
| H | 8.28420059  | 4.91085837 | 6.84491221  |
| H | 7.03533904  | 4.82325458 | 9.02040534  |
| H | 3.34909330  | 9.22215576 | 1.72796675  |
| H | -0.01935001 | 8.98586983 | 7.59573109  |
| H | 8.42666866  | 5.63352683 | 4.49828629  |
| H | 5.05822535  | 5.39724090 | 10.36605063 |
| C | 3.84208726  | 2.15285080 | 8.81606027  |
| C | 2.88789861  | 3.64642151 | 6.59696810  |
| C | 2.59654657  | 2.82977012 | 8.89857500  |
| C | 4.61053363  | 2.22271684 | 7.62399946  |
| C | 2.11945224  | 3.57655548 | 7.78902892  |
| C | 4.13343931  | 2.96950219 | 6.51445337  |
| C | 4.31918159  | 1.40606545 | 9.92560636  |
| C | 1.82810019  | 2.75990409 | 10.09063582 |

|   |             |            |             |
|---|-------------|------------|-------------|
| C | 5.85607433  | 1.54579752 | 7.54148472  |
| C | 2.41080428  | 4.39320687 | 5.48742202  |
| C | 0.87391154  | 4.25347480 | 7.87154365  |
| C | 4.90188568  | 3.03936823 | 5.32239255  |
| C | 2.30519452  | 2.01311873 | 11.20018190 |
| C | 6.33316866  | 0.79901216 | 8.65103081  |
| C | 0.39681721  | 5.00026015 | 6.76199756  |
| C | 4.42479135  | 3.78615358 | 4.21284647  |
| C | 3.55073524  | 1.33619938 | 11.11766722 |
| C | 5.56472231  | 0.72914610 | 9.84309167  |
| C | 1.16526357  | 5.07012622 | 5.56993670  |
| C | 3.17925063  | 4.46307294 | 4.29536115  |
| C | 0.58255969  | 3.43682335 | 10.17315042 |
| C | 6.62452051  | 1.61566361 | 6.34942403  |
| C | 0.10546537  | 4.18360870 | 9.06360434  |
| C | 6.14742618  | 2.36244897 | 5.23987795  |
| H | 3.91695551  | 0.76296276 | 11.96936100 |
| H | 5.93094258  | 0.15590948 | 10.69478546 |
| H | 0.79904329  | 5.64336284 | 4.71824292  |
| H | 2.81303036  | 5.03630955 | 3.44366737  |
| H | -0.00730414 | 3.38319379 | 11.08818310 |
| H | -0.85061878 | 4.70321583 | 9.12694314  |
| H | 7.58060465  | 1.09605649 | 6.28608524  |
| H | 6.73729001  | 2.41607852 | 4.32484527  |
| H | 1.71533091  | 1.95948909 | 12.11521450 |
| H | -0.55926676 | 5.51986725 | 6.82533619  |
| H | 7.28925263  | 0.27940507 | 8.58769218  |

|   |             |             |             |
|---|-------------|-------------|-------------|
| H | 5.01465497  | 3.83978323  | 3.29781387  |
| C | -1.70832369 | -2.19596533 | 2.07568593  |
| C | -3.97469479 | -2.52324005 | 0.39578925  |
| C | -3.00696536 | -1.90441840 | 2.57059024  |
| C | -1.54286757 | -2.65114962 | 0.74083327  |
| C | -4.14015091 | -2.06805576 | 1.73064191  |
| C | -2.67605312 | -2.81478698 | -0.09911507 |
| C | -0.57513814 | -2.03232798 | 2.91563426  |
| C | -3.17242148 | -1.44923411 | 3.90544290  |
| C | -0.24422591 | -2.94269656 | 0.24592895  |
| C | -5.10788033 | -2.68687741 | -0.44415908 |
| C | -5.43879257 | -1.77650883 | 2.22554623  |
| C | -2.51059700 | -3.26997127 | -1.43396772 |
| C | -2.03923593 | -1.28559676 | 4.74539124  |
| C | 0.88895964  | -2.77905920 | 1.08587729  |
| C | -6.57197812 | -1.94014619 | 1.38559789  |
| C | -3.64378255 | -3.43360863 | -2.27391606 |
| C | -0.74059421 | -1.57714368 | 4.25048695  |
| C | 0.72350357  | -2.32387490 | 2.42072998  |
| C | -6.40652205 | -2.39533048 | 0.05074520  |
| C | -4.94242426 | -3.14206170 | -1.77901178 |
| C | -4.47106300 | -1.15768725 | 4.40034704  |
| C | -0.07876993 | -3.39788077 | -1.08892353 |
| C | -5.60424855 | -1.32132461 | 3.56039871  |
| C | -1.21195548 | -3.56151813 | -1.92887186 |
| H | 0.12924535  | -1.45153473 | 4.89523600  |
| H | 1.59334314  | -2.19826595 | 3.06547902  |

|   |             |             |             |
|---|-------------|-------------|-------------|
| H | -7.27636162 | -2.52093943 | -0.59400384 |
| H | -5.81226383 | -3.26767065 | -2.42376082 |
| H | -4.59806808 | -0.80828520 | 5.42498755  |
| H | -6.60109329 | -1.09753152 | 3.94029010  |
| H | 0.91807481  | -3.62167386 | -1.46881492 |
| H | -1.08495040 | -3.91092019 | -2.95351237 |
| H | -2.16624082 | -0.93619476 | 5.77003160  |
| H | -7.56882277 | -1.71635317 | 1.76548907  |
| H | 1.88580429  | -3.00285221 | 0.70598610  |
| H | -3.51677766 | -3.78301062 | -3.29855643 |
| C | -3.25311167 | 5.98536815  | 2.08200888  |
| C | -4.64855958 | 4.29937415  | 0.27210588  |
| C | -3.26210354 | 6.28649830  | 0.69433462  |
| C | -3.94184376 | 4.84124101  | 2.56473164  |
| C | -3.95982750 | 5.44350130  | -0.21061688 |
| C | -4.63956771 | 3.99824401  | 1.65978014  |
| C | -2.55538772 | 6.82836515  | 2.98696038  |
| C | -2.57337145 | 7.43062544  | 0.21161186  |
| C | -3.93285189 | 4.54011086  | 3.95240591  |
| C | -5.34628354 | 3.45637715  | -0.63284562 |
| C | -3.96881937 | 5.74463144  | -1.59829114 |
| C | -5.32829980 | 2.85411686  | 2.14250291  |
| C | -1.87564750 | 8.27362244  | 1.11656336  |
| C | -3.23512793 | 5.38310786  | 4.85735741  |
| C | -4.66654332 | 4.90163444  | -2.50324264 |
| C | -6.02602375 | 2.01111986  | 1.23755141  |
| C | -1.86665560 | 7.97249233  | 2.50423766  |

|   |             |             |             |
|---|-------------|-------------|-------------|
| C | -2.54639582 | 6.52723504  | 4.37463468  |
| C | -5.35527544 | 3.75750726  | -2.02051992 |
| C | -6.03501565 | 2.31224997  | -0.15012289 |
| C | -2.58236339 | 7.73175545  | -1.17606223 |
| C | -4.62158391 | 3.39598386  | 4.43512849  |
| C | -3.28008735 | 6.88875845  | -2.08101373 |
| C | -5.31930786 | 2.55298686  | 3.53017699  |
| H | -1.33107879 | 8.61958155  | 3.19888349  |
| H | -2.01081900 | 7.17432426  | 5.06928052  |
| H | -5.89085225 | 3.11041805  | -2.71516576 |
| H | -6.57059247 | 1.66516076  | -0.84476873 |
| H | -2.05368872 | 8.60999397  | -1.54660299 |
| H | -3.28698954 | 7.11990768  | -3.14620040 |
| H | -4.61468171 | 3.16483463  | 5.50031516  |
| H | -5.84798254 | 1.67474834  | 3.90071775  |
| H | -1.34697286 | 9.15186086  | 0.74602281  |
| H | -4.67344562 | 5.13278350  | -3.56842918 |
| H | -3.22822564 | 5.15195881  | 5.92254394  |
| H | -6.55469839 | 1.13288145  | 1.60809195  |
| C | 6.86297931  | 1.35759224  | -0.74215106 |
| C | 5.16446971  | 1.92431784  | -2.94657542 |
| C | 6.69979040  | 0.39949053  | -1.77743391 |
| C | 6.17691342  | 2.59905676  | -0.80908040 |
| C | 5.85053560  | 0.68285333  | -2.87964608 |
| C | 5.32765862  | 2.88241955  | -1.91129258 |
| C | 7.71223411  | 1.07422944  | 0.36006111  |
| C | 7.38585629  | -0.84197398 | -1.71050457 |

|   |            |             |             |
|---|------------|-------------|-------------|
| C | 6.34010233 | 3.55715847  | 0.22620244  |
| C | 4.31521491 | 2.20768064  | -4.04878760 |
| C | 5.68734669 | -0.27524839 | -3.91492893 |
| C | 4.64159273 | 4.12388407  | -1.97822191 |
| C | 8.23511109 | -1.12533678 | -0.60829239 |
| C | 7.18935714 | 3.27379567  | 1.32841462  |
| C | 4.83809188 | 0.00811441  | -5.01714110 |
| C | 3.79233793 | 4.40724687  | -3.08043409 |
| C | 8.39830004 | -0.16723508 | 0.42699050  |
| C | 7.87542306 | 2.03233114  | 1.39534400  |
| C | 4.15202596 | 1.24957894  | -5.08407049 |
| C | 3.62914898 | 3.44914517  | -4.11571698 |
| C | 7.22266732 | -1.80007548 | -2.74578732 |
| C | 5.65403650 | 4.79862277  | 0.15927301  |
| C | 6.37341252 | -1.51671268 | -3.84799950 |
| C | 4.80478170 | 5.08198557  | -0.94293917 |
| H | 9.05019278 | -0.38474595 | 1.27305473  |
| H | 8.52731580 | 1.81482027  | 2.24140824  |
| H | 3.50013322 | 1.46708981  | -5.93013472 |
| H | 2.97725624 | 3.66665604  | -4.96178122 |
| H | 7.74929541 | -2.75303073 | -2.69441199 |
| H | 6.24814780 | -2.25215704 | -4.64268850 |
| H | 5.77930122 | 5.53406712  | 0.95396202  |
| H | 4.27815361 | 6.03494081  | -0.99431449 |
| H | 8.76173916 | -2.07829183 | -0.55691693 |
| H | 4.71282707 | -0.72732971 | -5.81183006 |
| H | 7.31462195 | 4.00923980  | 2.12310358  |



|   |             |            |             |
|---|-------------|------------|-------------|
| H | 3.26570986  | 5.36020191 | -3.13180956 |
| C | -0.27617335 | 4.81055349 | -2.17587191 |
| C | -1.71810031 | 2.60445444 | -1.11777308 |
| C | -0.96061324 | 3.92482822 | -3.04961837 |
| C | -0.31269694 | 4.59322922 | -0.77307603 |
| C | -1.68157672 | 2.82177870 | -2.52056895 |
| C | -1.03366042 | 3.49017970 | -0.24402662 |
| C | 0.44479013  | 5.91360301 | -2.70492132 |
| C | -0.92408964 | 4.14215249 | -4.45241424 |
| C | 0.37174294  | 5.47895448 | 0.10067043  |
| C | -2.43906379 | 1.50140491 | -0.58872366 |
| C | -2.36601661 | 1.93605344 | -3.39431541 |
| C | -1.07018402 | 3.27285544 | 1.15876926  |
| C | -0.20312616 | 5.24520201 | -4.98146366 |
| C | 1.09270643  | 6.58200401 | -0.42837898 |
| C | -3.08698009 | 0.83300391 | -2.86526600 |
| C | -1.79114750 | 2.16980591 | 1.68781867  |
| C | 0.48131376  | 6.13092732 | -4.10771722 |
| C | 1.12923005  | 6.79932832 | -1.83117488 |
| C | -3.12350371 | 0.61567961 | -1.46247010 |
| C | -2.47558742 | 1.28408060 | 0.81407223  |
| C | -1.60852947 | 3.25642729 | -5.32616048 |
| C | 0.33521929  | 5.26163016 | 1.50346608  |
| C | -2.32949295 | 2.15337777 | -4.79711107 |
| C | -0.38574419 | 4.15858063 | 2.03251550  |
| H | 1.03472936  | 6.97763431 | -4.51381851 |
| H | 1.68264565  | 7.64603531 | -2.23727617 |

|   |             |             |             |
|---|-------------|-------------|-------------|
| H | -3.67691932 | -0.23102738 | -1.05636881 |
| H | -3.02900302 | 0.43737361  | 1.22017353  |
| H | -1.58049376 | 3.42324662  | -6.40295460 |
| H | -2.85487291 | 1.47349001  | -5.46780385 |
| H | 0.86059924  | 5.94151791  | 2.17415887  |
| H | -0.41377990 | 3.99176130  | 3.10930962  |
| H | -0.17509036 | 5.41202145  | -6.05825758 |
| H | -3.61236001 | 0.15311618  | -3.53595854 |
| H | 1.61808635  | 7.26189174  | 0.24231355  |
| H | -1.81918330 | 2.00298647  | 2.76461259  |
| C | -0.17793716 | -5.80410799 | 2.47859688  |
| C | -1.20479393 | -4.89280793 | 4.96469761  |
| C | -1.58109664 | -5.71316186 | 2.67676939  |
| C | 0.71179394  | -5.43940408 | 3.52347473  |
| C | -2.09452503 | -5.25751183 | 3.91981976  |
| C | 0.19836555  | -4.98375405 | 4.76652510  |
| C | 0.33549123  | -6.25975802 | 1.23554651  |
| C | -2.47082773 | -6.07786576 | 1.63189154  |
| C | 2.11495342  | -5.53035021 | 3.32530221  |
| C | -1.71822232 | -4.43715790 | 6.20774798  |
| C | -3.49768451 | -5.16656570 | 4.11799228  |
| C | 1.08809664  | -4.61905015 | 5.81140295  |
| C | -1.95739934 | -6.53351579 | 0.38884118  |
| C | 2.62838181  | -5.98600024 | 2.08225184  |
| C | -4.01111290 | -4.71091567 | 5.36104265  |
| C | 0.57466825  | -4.16340012 | 7.05445331  |
| C | -0.55423984 | -6.62446194 | 0.19066861  |

|   |             |             |             |
|---|-------------|-------------|-------------|
| C | 1.73865074  | -6.35070416 | 1.03737394  |
| C | -3.12138183 | -4.34621175 | 6.40592055  |
| C | -0.82849125 | -4.07245398 | 7.25262588  |
| C | -3.87398699 | -5.98691961 | 1.83006414  |
| C | 3.00468429  | -5.16564634 | 4.37017998  |
| C | -4.38741538 | -5.53126958 | 3.07311451  |
| C | 2.49125590  | -4.70999631 | 5.61323035  |
| H | -0.16012934 | -6.97422145 | -0.76350381 |
| H | 2.13276124  | -6.70046368 | 0.08320152  |
| H | -3.51549233 | -3.99645224 | 7.36009297  |
| H | -1.22260176 | -3.72269446 | 8.20679830  |
| H | -4.55694967 | -6.26686840 | 1.02800996  |
| H | -5.46448860 | -5.46145882 | 3.22523285  |
| H | 4.08175751  | -5.23545710 | 4.21806164  |
| H | 3.17421858  | -4.43004751 | 6.41528453  |
| H | -2.64036178 | -6.81346457 | -0.41321298 |
| H | -5.08818592 | -4.64110487 | 5.51316112  |
| H | 3.70545483  | -6.05581105 | 1.93013337  |
| H | 1.25763069  | -3.88345134 | 7.85650747  |
| C | 3.71765991  | -2.78952016 | -1.56997228 |
| C | 3.34374220  | -0.22282138 | -0.41332090 |
| C | 2.89432136  | -1.83154214 | -2.21865696 |
| C | 4.35403960  | -2.46414880 | -0.34296192 |
| C | 2.70736251  | -0.54819274 | -1.64033127 |
| C | 4.16708074  | -1.18079941 | 0.23536377  |
| C | 3.90461877  | -4.07286955 | -2.14829797 |
| C | 2.25794167  | -2.15691350 | -3.44566733 |

|   |            |             |             |
|---|------------|-------------|-------------|
| C | 5.17737815 | -3.42212683 | 0.30572276  |
| C | 3.15678334 | 1.06052801  | 0.16500479  |
| C | 1.88402396 | 0.40978528  | -2.28901595 |
| C | 4.80346043 | -0.85542805 | 1.46237414  |
| C | 2.44490053 | -3.44026289 | -4.02399302 |
| C | 5.36433700 | -4.70547622 | -0.27260293 |
| C | 1.69706510 | 1.69313468  | -1.71069026 |
| C | 4.61650157 | 0.42792134  | 2.04069983  |
| C | 3.26823909 | -4.39824097 | -3.37530837 |
| C | 4.72795732 | -5.03084764 | -1.49961332 |
| C | 2.33344478 | 2.01850609  | -0.48367987 |
| C | 3.79316302 | 1.38589943  | 1.39201518  |
| C | 1.43460327 | -1.19893553 | -4.09435183 |
| C | 5.81375769 | -3.09675540 | 1.53273295  |
| C | 1.24764441 | 0.08441386  | -3.51602614 |
| C | 5.62679884 | -1.81340601 | 2.11105864  |
| H | 3.41174975 | -5.38334715 | -3.81923440 |
| H | 4.87146799 | -6.01595381 | -1.94353936 |
| H | 2.18993412 | 3.00361227  | -0.03975383 |
| H | 3.64965235 | 2.37100560  | 1.83594122  |
| H | 0.94611458 | -1.44869243 | -5.03621198 |
| H | 0.61564504 | 0.81976325  | -4.01396021 |
| H | 6.44575706 | -3.83210479 | 2.03066702  |
| H | 6.11528752 | -1.56364912 | 3.05291880  |
| H | 1.95641199 | -3.69001990 | -4.96585302 |
| H | 1.06506587 | 2.42848405  | -2.20862413 |
| H | 5.99633624 | -5.44082560 | 0.22533094  |

|   |            |            |            |
|---|------------|------------|------------|
| H | 5.10499011 | 0.67767836 | 2.98255983 |
| K | 0.20465800 | 0.10074000 | 0.48149700 |

397

n = 11, Energy = -1095.39267580

|   |             |             |            |
|---|-------------|-------------|------------|
| C | 1.09151171  | -1.46700442 | 4.31181846 |
| C | 3.22071976  | 0.18679570  | 3.41905995 |
| C | 1.67640083  | -0.52303325 | 5.19681746 |
| C | 1.57122661  | -1.58407553 | 2.98044021 |
| C | 2.74100486  | 0.30386681  | 4.75043820 |
| C | 2.63583063  | -0.75717547 | 2.53406095 |
| C | 0.02690768  | -2.29390448 | 4.75819771 |
| C | 1.19668593  | -0.40596215 | 6.52819571 |
| C | 0.98633749  | -2.52804670 | 2.09544121 |
| C | 4.28532378  | 1.01369576  | 2.97268070 |
| C | 3.32589398  | 1.24783797  | 5.63543720 |
| C | 3.11554554  | -0.87424658 | 1.20268270 |
| C | 0.13208190  | -1.23286221 | 6.97457496 |
| C | -0.07826654 | -3.35494676 | 2.54182047 |
| C | 4.39049801  | 2.07473803  | 5.18905794 |
| C | 4.18014956  | -0.04734652 | 0.75630345 |
| C | -0.45280726 | -2.17683341 | 6.08957598 |
| C | -0.55798149 | -3.23787569 | 3.87319873 |
| C | 4.87021295  | 1.95766696  | 3.85767968 |
| C | 4.76503873  | 0.89662469  | 1.64130243 |
| C | 1.78157504  | 0.53800892  | 7.41319449 |
| C | 1.46605240  | -2.64511770 | 0.76406318 |
| C | 2.84617907  | 1.36490898  | 6.96681523 |

|   |             |             |             |
|---|-------------|-------------|-------------|
| C | 2.53065642  | -1.81821764 | 0.31768392  |
| H | -1.27000327 | -2.81156652 | 6.43221919  |
| H | -1.37517749 | -3.87260880 | 4.21584195  |
| H | 5.68740896  | 2.59240007  | 3.51503646  |
| H | 5.58223474  | 1.53135780  | 1.29865922  |
| H | 1.41334316  | 0.62787338  | 8.43516803  |
| H | 3.29514328  | 2.08950662  | 7.64614553  |
| H | 1.01708818  | -3.36971535 | 0.08473288  |
| H | 2.89888830  | -1.90808211 | -0.70428962 |
| H | -0.23615003 | -1.14299788 | 7.99654831  |
| H | 4.83946225  | 2.79933561  | 5.86838800  |
| H | -0.52723079 | -4.07954434 | 1.86249041  |
| H | 4.54838150  | -0.13721084 | -0.26566990 |
| C | 4.32100485  | 2.14309910  | -6.19707691 |
| C | 4.32684320  | 4.38214424  | -4.45001014 |
| C | 3.10741869  | 2.58817882  | -5.60927359 |
| C | 5.53751019  | 2.81754195  | -5.91134684 |
| C | 3.11033786  | 3.70770139  | -4.73574021 |
| C | 5.54042937  | 3.93706452  | -5.03781346 |
| C | 4.31808568  | 1.02357653  | -7.07061029 |
| C | 1.89091334  | 1.91373597  | -5.89500366 |
| C | 6.75109636  | 2.37246223  | -6.49915016 |
| C | 4.32976238  | 5.50166681  | -3.57647676 |
| C | 1.89675170  | 4.15278111  | -4.14793689 |
| C | 6.75693471  | 4.61150737  | -4.75208339 |
| C | 1.88799417  | 0.79421340  | -6.76853704 |
| C | 6.74817718  | 1.25293966  | -7.37268354 |

|   |             |             |             |
|---|-------------|-------------|-------------|
| C | 1.89967087  | 5.27230368  | -3.27440351 |
| C | 6.75985389  | 5.73102994  | -3.87855001 |
| C | 3.10158033  | 0.34913363  | -7.35634039 |
| C | 5.53167184  | 0.57849676  | -7.65841364 |
| C | 3.11617621  | 5.94674657  | -2.98867340 |
| C | 5.54626772  | 6.17610971  | -3.29074665 |
| C | 0.67732741  | 2.35881571  | -5.30720037 |
| C | 7.96760147  | 3.04690506  | -6.21342006 |
| C | 0.68024659  | 3.47833828  | -4.43366699 |
| C | 7.97052064  | 4.16642763  | -5.33988668 |
| H | 3.09933956  | -0.51021816 | -8.02686951 |
| H | 5.52943107  | -0.28085503 | -8.32894276 |
| H | 3.11841699  | 6.80609836  | -2.31814429 |
| H | 5.54850850  | 7.03546150  | -2.62021754 |
| H | -0.25646903 | 1.84110954  | -5.52652839 |
| H | -0.25130908 | 3.81998399  | -3.98246582 |
| H | 8.89915714  | 2.70525934  | -6.66462123 |
| H | 8.90431709  | 4.68413380  | -5.12055866 |
| H | 0.95419796  | 0.27650720  | -6.98786513 |
| H | 0.96811543  | 5.61394946  | -2.82320233 |
| H | 7.67973262  | 0.91129388  | -7.82388472 |
| H | 7.69365010  | 6.24873613  | -3.65922192 |
| C | -4.35864656 | -3.30367823 | -3.46817853 |
| C | -3.42881445 | -1.06156717 | -4.94261055 |
| C | -3.51055687 | -3.49444520 | -4.59101063 |
| C | -4.74182019 | -1.99185572 | -3.08256244 |
| C | -3.04564081 | -2.37338967 | -5.32822664 |

|   |             |             |             |
|---|-------------|-------------|-------------|
| C | -4.27690414 | -0.87080020 | -3.81977845 |
| C | -4.82356261 | -4.42473375 | -2.73096252 |
| C | -3.12738323 | -4.80626770 | -4.97662671 |
| C | -5.58990988 | -1.80108875 | -1.95973034 |
| C | -2.96389840 | 0.05948836  | -5.67982656 |
| C | -2.19755113 | -2.56415665 | -6.45105873 |
| C | -4.66007777 | 0.44102230  | -3.43416237 |
| C | -3.59229929 | -5.92732323 | -4.23941070 |
| C | -6.05482593 | -2.92214428 | -1.22251433 |
| C | -1.73263507 | -1.44310112 | -7.18827474 |
| C | -4.19516172 | 1.56207783  | -4.17137838 |
| C | -4.44038899 | -5.73655630 | -3.11657857 |
| C | -5.67165232 | -4.23396683 | -1.60813039 |
| C | -2.11580869 | -0.13127857 | -6.80265869 |
| C | -3.34707201 | 1.37131090  | -5.29421050 |
| C | -2.27929366 | -4.99703453 | -6.09945866 |
| C | -5.97308340 | -0.48926639 | -1.57411440 |
| C | -1.81437761 | -3.87597900 | -6.83667467 |
| C | -5.50816734 | 0.63178913  | -2.31133041 |
| H | -4.79726116 | -6.59708480 | -2.55068744 |
| H | -6.02852448 | -5.09449532 | -1.04223925 |
| H | -1.75893652 | 0.72924993  | -7.36854982 |
| H | -2.99019985 | 2.23183940  | -5.86010164 |
| H | -1.98516739 | -6.00399696 | -6.39545979 |
| H | -1.16337913 | -4.02241284 | -7.69856699 |
| H | -6.62408188 | -0.34283256 | -0.71222208 |
| H | -5.80229362 | 1.63875156  | -2.01532929 |



|   |             |             |              |
|---|-------------|-------------|--------------|
| H | -3.29817315 | -6.93428556 | -4.53541165  |
| H | -1.08163669 | -1.58953476 | -8.05016695  |
| H | -6.70582432 | -2.77571063 | -0.36062213  |
| H | -4.48928786 | 2.56904016  | -3.87537743  |
| C | -0.82456110 | 7.98659128  | -9.49443018  |
| C | -3.27041840 | 6.63332967  | -9.99649055  |
| C | -2.01186011 | 8.39680223  | -8.83227604  |
| C | -0.86019073 | 6.89974952  | -10.40761450 |
| C | -3.23478876 | 7.72017143  | -9.08330623  |
| C | -2.08311938 | 6.22311872  | -10.65864469 |
| C | 0.39836755  | 8.66322208  | -9.24340000  |
| C | -1.97623047 | 9.48364398  | -7.91909172  |
| C | 0.32710828  | 6.48953857  | -11.06976864 |
| C | -4.49334705 | 5.95669887  | -10.24752074 |
| C | -4.42208777 | 8.13038238  | -8.42115209  |
| C | -2.11874902 | 5.13627697  | -11.57182901 |
| C | -0.75330182 | 10.16027479 | -7.66806154  |
| C | 1.55003693  | 7.16616937  | -10.81873846 |
| C | -5.64501642 | 7.45375158  | -8.67218228  |
| C | -3.34167767 | 4.45964617  | -11.82285920 |
| C | 0.43399724  | 9.75006386  | -8.33021566  |
| C | 1.58566662  | 8.25301115  | -9.90555412  |
| C | -5.68064611 | 6.36690980  | -9.58536661  |
| C | -4.52897674 | 4.86985709  | -11.16070507 |
| C | -3.16352938 | 9.89385479  | -7.25693774  |
| C | 0.29147853  | 5.40269696  | -11.98295281 |
| C | -4.38645803 | 9.21722399  | -7.50796792  |

|   |             |             |              |
|---|-------------|-------------|--------------|
| C | -0.93145012 | 4.72606616  | -12.23398300 |
| H | 1.37272412  | 10.26944945 | -8.13752349  |
| H | 2.52439350  | 8.77239674  | -9.71286195  |
| H | -6.61937299 | 5.84752421  | -9.77805878  |
| H | -5.46770361 | 4.35047150  | -11.35339724 |
| H | -3.13617988 | 10.72812072 | -6.55597224  |
| H | -5.29783551 | 9.53210427  | -6.99969462  |
| H | 1.20285602  | 5.08781668  | -12.49122611 |
| H | -0.95879961 | 3.89180023  | -12.93494849 |
| H | -0.72595217 | 10.99454060 | -6.96709618  |
| H | -6.55639385 | 7.76863169  | -8.16390914  |
| H | 2.46141436  | 6.85128926  | -11.32701160 |
| H | -3.36902733 | 3.62538035  | -12.52382455 |
| C | 6.46870750  | 0.57375712  | -3.19604108  |
| C | 6.47174379  | 2.85397601  | -1.50305788  |
| C | 5.25014229  | 1.04957846  | -2.64368887  |
| C | 7.68879086  | 1.23804523  | -2.90190168  |
| C | 5.25166043  | 2.18968790  | -1.79719728  |
| C | 7.69030900  | 2.37815467  | -2.05541008  |
| C | 6.46718935  | -0.56635233 | -4.04253267  |
| C | 4.03005893  | 0.38529035  | -2.93782827  |
| C | 8.90735607  | 0.76222389  | -3.45425388  |
| C | 6.47326194  | 3.99408546  | -0.65656628  |
| C | 4.03309522  | 2.66550924  | -1.24484507  |
| C | 8.91039236  | 3.04244278  | -1.76127069  |
| C | 4.02854078  | -0.75481910 | -3.78431987  |
| C | 8.90583792  | -0.37788555 | -4.30074548  |

|   |             |             |             |
|---|-------------|-------------|-------------|
| C | 4.03461337  | 3.80561869  | -0.39835348 |
| C | 8.91191051  | 4.18255223  | -0.91477909 |
| C | 5.24710599  | -1.23064048 | -4.33667210 |
| C | 7.68575456  | -1.04217371 | -4.59488491 |
| C | 5.25469673  | 4.46990684  | -0.10421404 |
| C | 7.69334530  | 4.65837361  | -0.36242685 |
| C | 2.81149395  | 0.86111170  | -2.38547609 |
| C | 10.12743919 | 1.42651198  | -3.16011446 |
| C | 2.81301210  | 2.00122115  | -1.53898449 |
| C | 10.12895734 | 2.56662143  | -2.31362287 |
| H | 5.24594066  | -2.10579487 | -4.98644379 |
| H | 7.68458923  | -1.91732810 | -5.24465660 |
| H | 5.25586206  | 5.34506123  | 0.54555764  |
| H | 7.69451063  | 5.53352800  | 0.28734484  |
| H | 1.87495100  | 0.35120038  | -2.61125916 |
| H | 1.87763448  | 2.36646431  | -1.11499580 |
| H | 11.06281681 | 1.06126882  | -3.58410316 |
| H | 11.06550029 | 3.07653276  | -2.08783980 |
| H | 3.09199806  | -1.26473045 | -4.01010299 |
| H | 3.09923599  | 4.17086191  | 0.02563523  |
| H | 9.84121530  | -0.74312878 | -4.72473418 |
| H | 9.84845323  | 4.69246359  | -0.68899596 |
| C | -7.78439658 | -0.72613341 | -4.97011452 |
| C | -6.88098009 | 1.62038578  | -6.29045003 |
| C | -6.96833122 | -0.83215746 | -6.12735102 |
| C | -8.14875369 | 0.55315023  | -4.47304578 |
| C | -6.51662297 | 0.34110214  | -6.78751877 |

|   |             |             |             |
|---|-------------|-------------|-------------|
| C | -7.69704545 | 1.72640983  | -5.13321353 |
| C | -8.23610482 | -1.89939301 | -4.30994677 |
| C | -6.60397410 | -2.11144110 | -6.62441976 |
| C | -8.96481906 | 0.65917428  | -3.31580929 |
| C | -6.42927185 | 2.79364538  | -6.95061778 |
| C | -5.70055761 | 0.23507809  | -7.94475527 |
| C | -8.06140257 | 3.00569347  | -4.63614479 |
| C | -7.05568234 | -3.28470069 | -5.96425200 |
| C | -9.41652730 | -0.51408532 | -2.65564153 |
| C | -5.24884937 | 1.40833769  | -8.60492302 |
| C | -7.60969433 | 4.17895306  | -5.29631255 |
| C | -7.87174772 | -3.17867670 | -4.80701548 |
| C | -9.05217020 | -1.79336901 | -3.15271025 |
| C | -5.61320647 | 2.68762138  | -8.10785431 |
| C | -6.79362895 | 4.07292907  | -6.45354907 |
| C | -5.78790885 | -2.21746501 | -7.78165609 |
| C | -9.32917606 | 1.93845778  | -2.81874071 |
| C | -5.33620061 | -1.04420541 | -8.44182385 |
| C | -8.87746782 | 3.11171738  | -3.47890846 |
| H | -8.21848150 | -4.07927733 | -4.30026702 |
| H | -9.39890397 | -2.69396964 | -2.64596178 |
| H | -5.26647269 | 3.58822201  | -8.61460277 |
| H | -6.44689517 | 4.97352970  | -6.96029753 |
| H | -5.50822624 | -3.19945042 | -8.16320891 |
| H | -4.70978418 | -1.12559009 | -9.33012518 |
| H | -9.95559248 | 2.01984246  | -1.93043937 |
| H | -9.15715043 | 4.09370279  | -3.09735565 |

|   |              |             |             |
|---|--------------|-------------|-------------|
| H | -6.77599986  | -4.26668602 | -6.34580463 |
| H | -4.62243304  | 1.32695319  | -9.49322422 |
| H | -10.04294363 | -0.43270082 | -1.76734033 |
| H | -7.88937680  | 5.16093839  | -4.91475992 |
| C | -0.54346460  | -3.69368378 | -2.42898575 |
| C | -2.29588370  | -3.32913818 | -0.22405189 |
| C | -1.02202669  | -2.39549723 | -2.10947034 |
| C | -0.94111206  | -4.80959752 | -1.64603423 |
| C | -1.89823624  | -2.21322443 | -1.00700341 |
| C | -1.81732161  | -4.62732473 | -0.54356730 |
| C | 0.33274495   | -3.87595658 | -3.53145268 |
| C | -0.62437923  | -1.27958349 | -2.89242186 |
| C | -0.46254997  | -6.10778407 | -1.96554964 |
| C | -3.17209325  | -3.14686538 | 0.87841504  |
| C | -2.37679833  | -0.91503789 | -0.68748801 |
| C | -2.21496907  | -5.74323847 | 0.23938422  |
| C | 0.25183032   | -1.46185628 | -3.99488879 |
| C | 0.41365958   | -6.29005687 | -3.06801657 |
| C | -3.25300788  | -0.73276509 | 0.41497892  |
| C | -3.09117861  | -5.56096568 | 1.34185115  |
| C | 0.73039245   | -2.76004284 | -4.31440425 |
| C | 0.81130708   | -5.17414313 | -3.85096814 |
| C | -3.65065537  | -1.84867883 | 1.19793049  |
| C | -3.56974074  | -4.26277912 | 1.66136660  |
| C | -1.10294131  | 0.01860283  | -2.57290641 |
| C | -0.86019743  | -7.22369758 | -1.18259816 |
| C | -1.97915086  | 0.20087562  | -1.47043948 |

|   |             |             |             |
|---|-------------|-------------|-------------|
| C | -1.73640698 | -7.04142478 | -0.08013123 |
| H | 1.40297580  | -2.89995646 | -5.16066403 |
| H | 1.48389043  | -5.31405675 | -4.69722792 |
| H | -4.32323873 | -1.70876521 | 2.04419028  |
| H | -4.24232410 | -4.12286550 | 2.50762639  |
| H | -0.79770486 | 0.87518459  | -3.17390445 |
| H | -2.34649784 | 1.19737103  | -1.22517765 |
| H | -0.49285045 | -8.22019299 | -1.42786000 |
| H | -2.04164343 | -7.89800655 | 0.52086681  |
| H | 0.55706681  | -0.60527476 | -4.59588684 |
| H | -3.62035489 | 0.26373009  | 0.66024085  |
| H | 0.78100659  | -7.28655205 | -3.31327850 |
| H | -3.39641511 | -6.41754720 | 1.94284919  |
| C | -1.34060752 | 5.35055603  | 3.94337088  |
| C | -0.73692371 | 6.79157693  | 1.57174187  |
| C | 0.01168003  | 5.55218189  | 3.55987975  |
| C | -2.39105318 | 5.86944061  | 3.14104750  |
| C | 0.31352194  | 6.27269234  | 2.37406525  |
| C | -2.08921127 | 6.58995106  | 1.95523300  |
| C | -1.64244943 | 4.63004558  | 5.12918538  |
| C | 1.06212569  | 5.03329730  | 4.36220312  |
| C | -3.74334074 | 5.66781475  | 3.52453863  |
| C | -0.43508180 | 7.51208738  | 0.38592737  |
| C | 1.66580950  | 6.47431820  | 1.99057412  |
| C | -3.13965692 | 7.10883565  | 1.15290962  |
| C | 0.76028378  | 4.31278685  | 5.54801763  |
| C | -4.04518264 | 4.94730430  | 4.71035313  |

|   |             |            |             |
|---|-------------|------------|-------------|
| C | 1.96765141  | 7.19482865 | 0.80475962  |
| C | -2.83781501 | 7.82934610 | -0.03290488 |
| C | -0.59200380 | 4.11116096 | 5.93150880  |
| C | -2.99473701 | 4.42841968 | 5.51267655  |
| C | 0.91720577  | 7.71371327 | 0.00243620  |
| C | -1.48552744 | 8.03097199 | -0.41639605 |
| C | 2.41441301  | 5.23492320 | 3.97871196  |
| C | -4.79378615 | 6.18669930 | 2.72221529  |
| C | 2.71625492  | 5.95543365 | 2.79289746  |
| C | -4.49194424 | 6.90720975 | 1.53640079  |
| H | -0.82369933 | 3.55809311 | 6.84174665  |
| H | -3.22643254 | 3.87535183 | 6.42291440  |
| H | 1.14890131  | 8.26678112 | -0.90780165 |
| H | -1.25383190 | 8.58403985 | -1.32663390 |
| H | 3.22074110  | 4.83662444 | 4.59457994  |
| H | 3.75427857  | 6.11020280 | 2.49852749  |
| H | -5.83180980 | 6.03193015 | 3.01658525  |
| H | -5.29827233 | 7.30550851 | 0.92053281  |
| H | 1.56661162  | 3.91448809 | 6.16388562  |
| H | 3.00567484  | 7.34959787 | 0.51038957  |
| H | -5.08320607 | 4.79253508 | 5.00472318  |
| H | -3.64414285 | 8.22764486 | -0.64877287 |
| C | 0.77209358  | 5.03176469 | -7.67605867 |
| C | 0.88160108  | 7.21675300 | -5.86513799 |
| C | 2.00014342  | 5.70939876 | -7.45446051 |
| C | -0.40120250 | 5.44662478 | -6.99219650 |
| C | 2.05489717  | 6.80189291 | -6.54900016 |

|   |             |            |             |
|---|-------------|------------|-------------|
| C | -0.34644876 | 6.53911893 | -6.08673616 |
| C | 0.71733983  | 3.93927054 | -8.58151902 |
| C | 3.17343951  | 5.29453867 | -8.13832268 |
| C | -1.62925234 | 4.76899072 | -7.21379467 |
| C | 0.93635483  | 8.30924715 | -4.95967765 |
| C | 3.28294701  | 7.47952697 | -6.32740199 |
| C | -1.51974484 | 6.95397902 | -5.40287399 |
| C | 3.11868576  | 4.20204452 | -9.04378302 |
| C | -1.68400609 | 3.67649656 | -8.11925501 |
| C | 3.33770076  | 8.57202113 | -5.42194165 |
| C | -1.46499110 | 8.04647317 | -4.49741364 |
| C | 1.89063592  | 3.52441041 | -9.26538123 |
| C | -0.51071000 | 3.26163643 | -8.80311722 |
| C | 2.16440467  | 8.98688126 | -4.73807944 |
| C | -0.23694126 | 8.72410728 | -4.27581544 |
| C | 4.40148911  | 5.97217271 | -7.91672446 |
| C | -2.80254820 | 5.18385083 | -6.52993254 |
| C | 4.45624286  | 7.06466686 | -7.01126412 |
| C | -2.74779445 | 6.27634498 | -5.62447220 |
| H | 1.84860664  | 2.68580578 | -9.96041765 |
| H | -0.55273929 | 2.42303180 | -9.49815365 |
| H | 2.20643395  | 9.82548589 | -4.04304301 |
| H | -0.19491197 | 9.56271191 | -3.58077901 |
| H | 5.30211789  | 5.65372375 | -8.44166096 |
| H | 5.39890093  | 7.58482262 | -6.84116412 |
| H | -3.74520627 | 4.66369507 | -6.70003255 |
| H | -3.64842323 | 6.59479394 | -5.09953570 |



|   |             |             |             |
|---|-------------|-------------|-------------|
| H | 4.01931431  | 3.88359549  | -9.56871951 |
| H | 4.28035859  | 9.09217691  | -5.25184156 |
| H | -2.62666393 | 3.15634078  | -8.28935510 |
| H | -2.36561964 | 8.36492220  | -3.97247715 |
| C | 5.45005665  | -2.91029444 | 3.04449963  |
| C | 4.60327760  | -4.30606759 | 0.72062741  |
| C | 4.40409475  | -3.86666489 | 3.13235942  |
| C | 6.07262902  | -2.65181056 | 1.79470372  |
| C | 3.98070522  | -4.56455147 | 1.97042331  |
| C | 5.64923950  | -3.34969713 | 0.63276762  |
| C | 5.87344617  | -2.21240787 | 4.20643574  |
| C | 3.78152237  | -4.12514877 | 4.38215533  |
| C | 7.11859092  | -1.69544011 | 1.70684393  |
| C | 4.17988808  | -5.00395416 | -0.44130870 |
| C | 2.93474333  | -5.52092192 | 2.05828311  |
| C | 6.27181187  | -3.09121326 | -0.61702829 |
| C | 4.20491190  | -3.42726220 | 5.54409143  |
| C | 7.54198044  | -0.99755354 | 2.86878004  |
| C | 2.51135380  | -6.21880849 | 0.89634700  |
| C | 5.84842235  | -3.78909983 | -1.77896440 |
| C | 5.25087381  | -2.47089172 | 5.45623169  |
| C | 6.91940808  | -1.25603738 | 4.11857599  |
| C | 3.13392616  | -5.96032464 | -0.35344895 |
| C | 4.80246043  | -4.74547031 | -1.69110465 |
| C | 2.73556064  | -5.08151910 | 4.47001499  |
| C | 7.74116313  | -1.43695635 | 0.45704816  |
| C | 2.31217111  | -5.77940568 | 3.30807888  |

|   |             |             |             |
|---|-------------|-------------|-------------|
| C | 7.31777361  | -2.13484292 | -0.70488795 |
| H | 5.57586998  | -1.93519008 | 6.34814035  |
| H | 7.24440425  | -0.72033574 | 5.01048465  |
| H | 2.80892999  | -6.49602628 | -1.24535761 |
| H | 4.47746426  | -5.28117195 | -2.58301331 |
| H | 2.25767052  | -5.27993282 | 5.42936545  |
| H | 1.50928479  | -6.51352109 | 3.37552058  |
| H | 8.54404945  | -0.70284094 | 0.38960646  |
| H | 7.79566372  | -1.93642921 | -1.66423841 |
| H | 3.72702196  | -3.62567576 | 6.50344181  |
| H | 1.70846763  | -6.95292381 | 0.96378852  |
| H | 8.34486662  | -0.26343821 | 2.80133852  |
| H | 6.32631229  | -3.59068626 | -2.73831477 |
| C | -4.58590422 | 3.17057028  | 0.62249634  |
| C | -2.45203866 | 2.26642210  | 2.26406064  |
| C | -4.86159627 | 2.41818433  | 1.79480575  |
| C | -3.24327939 | 3.47088214  | 0.27096908  |
| C | -3.79466349 | 1.96611024  | 2.61558790  |
| C | -2.17634660 | 3.01880805  | 1.09175123  |
| C | -5.65283700 | 3.62264437  | -0.19828580 |
| C | -6.20422111 | 2.11787247  | 2.14633301  |
| C | -2.96758733 | 4.22326809  | -0.90134033 |
| C | -1.38510588 | 1.81434801  | 3.08484279  |
| C | -4.07035555 | 1.21372429  | 3.78789731  |
| C | -0.83372177 | 3.31911991  | 0.74022397  |
| C | -7.27115389 | 2.56994656  | 1.32555087  |
| C | -4.03452012 | 4.67534218  | -1.72212247 |

|   |             |            |             |
|---|-------------|------------|-------------|
| C | -3.00342276 | 0.76165020 | 4.60867946  |
| C | 0.23321101  | 2.86704582 | 1.56100612  |
| C | -6.99546188 | 3.32233252 | 0.15324142  |
| C | -5.37714500 | 4.37503034 | -1.37059525 |
| C | -1.66079788 | 1.06196204 | 4.25715223  |
| C | -0.04248100 | 2.11465985 | 2.73331556  |
| C | -6.47991301 | 1.36548662 | 3.31864228  |
| C | -1.62496266 | 4.52357985 | -1.25286744 |
| C | -5.41298022 | 0.91341253 | 4.13942442  |
| C | -0.55802987 | 4.07150576 | -0.43208529 |
| H | -7.81444546 | 3.66934713 | -0.47679555 |
| H | -6.19612857 | 4.72204494 | -2.00063222 |
| H | -0.84181431 | 0.71494744 | 4.88718920  |
| H | 0.77650258  | 1.76764525 | 3.36335253  |
| H | -7.51051948 | 1.13496551 | 3.58847662  |
| H | -5.62460303 | 0.33587678 | 5.03929581  |
| H | -1.41333984 | 5.10111559 | -2.15273882 |
| H | 0.47257660  | 4.30202686 | -0.70191964 |
| H | -8.30176025 | 2.33942557 | 1.59538503  |
| H | -3.21504537 | 0.18411454 | 5.50855073  |
| H | -3.82289751 | 5.25287784 | -2.62199375 |
| H | 1.26381738  | 3.09756681 | 1.29117195  |
| K | 0.20465800  | 0.10074000 | 0.48149700  |

433

n = 12, Energy = -1183.04555261

|   |            |             |            |
|---|------------|-------------|------------|
| C | 8.54332844 | -6.00780600 | 1.70681421 |
| C | 7.15138188 | -6.60806982 | 4.10843192 |

|   |             |             |             |
|---|-------------|-------------|-------------|
| C | 8.58080770  | -5.09718210 | 2.79574005  |
| C | 7.80987590  | -7.21856182 | 1.81869723  |
| C | 7.88483442  | -5.39731401 | 3.99654891  |
| C | 7.11390262  | -7.51869373 | 3.01950608  |
| C | 9.23930172  | -5.70767409 | 0.50600535  |
| C | 9.31426024  | -3.88642629 | 2.68385704  |
| C | 7.77239664  | -8.12918572 | 0.72977139  |
| C | 6.45540860  | -6.90820173 | 5.30924078  |
| C | 7.92231368  | -4.48669011 | 5.08547475  |
| C | 6.38045008  | -8.72944954 | 3.13138910  |
| C | 10.01023352 | -3.58629438 | 1.48304818  |
| C | 8.46836992  | -7.82905381 | -0.47103747 |
| C | 7.22634040  | -4.78682202 | 6.28628361  |
| C | 5.68447680  | -9.02958145 | 4.33219795  |
| C | 9.97275429  | -4.49691827 | 0.39412229  |
| C | 9.20182249  | -6.61829799 | -0.58292054 |
| C | 6.49288783  | -5.99757784 | 6.39816667  |
| C | 5.72195603  | -8.11895756 | 5.42112385  |
| C | 9.35173942  | -2.97580259 | 3.77278278  |
| C | 7.03894418  | -9.33994133 | 0.84165450  |
| C | 8.65576614  | -3.27593450 | 4.97359164  |
| C | 6.34297090  | -9.64007324 | 2.04246335  |
| H | 10.50698727 | -4.26653533 | -0.52762531 |
| H | 9.73605547  | -6.38791505 | -1.50466814 |
| H | 5.95865485  | -6.22796078 | 7.31991427  |
| H | 5.18772305  | -8.34934049 | 6.34287144  |
| H | 9.91474177  | -2.04641951 | 3.68690076  |

|   |             |              |             |
|---|-------------|--------------|-------------|
| H | 8.68453545  | -2.57693438  | 5.80945732  |
| H | 7.01017487  | -10.03894144 | 0.00578882  |
| H | 5.77996855  | -10.56945631 | 2.12834537  |
| H | 10.57323582 | -2.65691150  | 1.39716601  |
| H | 7.25510960  | -4.08782212  | 7.12214924  |
| H | 8.43960072  | -8.52805371  | -1.30690310 |
| H | 5.12147450  | -9.95896433  | 4.41808012  |
| C | 3.20373484  | 1.21872028   | 3.54488358  |
| C | 1.52704404  | -0.67865852  | 4.83106443  |
| C | 2.75493542  | 1.45202873   | 4.87173939  |
| C | 2.81418886  | 0.03672243   | 2.86111820  |
| C | 1.91659002  | 0.50333933   | 5.51482981  |
| C | 1.97584346  | -0.91196697  | 3.50420863  |
| C | 4.04208024  | 2.16740967   | 2.90179316  |
| C | 3.14448140  | 2.63402657   | 5.55550476  |
| C | 3.26298828  | -0.19658602  | 1.53426240  |
| C | 0.68869864  | -1.62734792  | 5.47415486  |
| C | 1.46779060  | 0.73664778   | 6.84168561  |
| C | 1.58629748  | -2.09396482  | 2.82044325  |
| C | 3.98282680  | 3.58271597   | 4.91241434  |
| C | 4.10133368  | 0.75210337   | 0.89117197  |
| C | 0.62944520  | -0.21204162  | 7.48477604  |
| C | 0.74795208  | -3.04265422  | 3.46353368  |
| C | 4.43162626  | 3.34940756   | 3.58555851  |
| C | 4.49087970  | 1.93410126   | 1.57493732  |
| C | 0.23989919  | -1.39403951  | 6.80101069  |
| C | 0.29915263  | -2.80934581  | 4.79038951  |

|   |             |             |             |
|---|-------------|-------------|-------------|
| C | 2.69568199  | 2.86733489  | 6.88236037  |
| C | 2.87344230  | -1.37858373 | 0.85049722  |
| C | 1.85733659  | 1.91864549  | 7.52545080  |
| C | 2.03509690  | -2.32727313 | 1.49358764  |
| H | 5.07514488  | 4.07762685  | 3.09191870  |
| H | 5.13439832  | 2.66232055  | 1.08129751  |
| H | -0.40361943 | -2.12225880 | 7.29465050  |
| H | -0.34436599 | -3.53756510 | 5.28402932  |
| H | 2.99469970  | 3.77464317  | 7.40722259  |
| H | 1.51283561  | 2.09773440  | 8.54395288  |
| H | 3.21794328  | -1.55767265 | -0.16800487 |
| H | 1.73607919  | -3.23458142 | 0.96872542  |
| H | 4.28184455  | 4.49002416  | 5.43727634  |
| H | 0.28494419  | -0.03295288 | 8.50327796  |
| H | 4.44583470  | 0.57301464  | -0.12732994 |
| H | 0.44893434  | -3.94996240 | 2.93867168  |
| C | -2.46046980 | -5.93184157 | -0.12819522 |
| C | -2.69722093 | -5.53067147 | -2.92973247 |
| C | -1.29465354 | -5.78325412 | -0.92518600 |
| C | -3.74466162 | -5.87984397 | -0.73197307 |
| C | -1.41302911 | -5.58266907 | -2.32595463 |
| C | -3.86303719 | -5.67925892 | -2.13274170 |
| C | -2.34209423 | -6.13242662 | 1.27257340  |
| C | -0.01046172 | -5.83525171 | -0.32140815 |
| C | -4.91047788 | -6.02843142 | 0.06501771  |
| C | -2.81559649 | -5.33008643 | -4.33050110 |
| C | -0.24721285 | -5.43408162 | -3.12294540 |

|   |             |             |             |
|---|-------------|-------------|-------------|
| C | -5.14722901 | -5.62726133 | -2.73651955 |
| C | 0.10791385  | -6.03583676 | 1.07936047  |
| C | -4.79210231 | -6.22901647 | 1.46578633  |
| C | -0.36558841 | -5.23349657 | -4.52371403 |
| C | -5.26560457 | -5.42667628 | -4.13728817 |
| C | -1.05790241 | -6.18442422 | 1.87635131  |
| C | -3.50791049 | -6.28101408 | 2.06956424  |
| C | -1.64978024 | -5.18149897 | -5.12749194 |
| C | -4.09978832 | -5.27808882 | -4.93427901 |
| C | 1.15535430  | -5.68666427 | -1.11839891 |
| C | -6.19466946 | -5.97643382 | -0.53876016 |
| C | 1.03697874  | -5.48607923 | -2.51916754 |
| C | -6.31304503 | -5.77584877 | -1.93952879 |
| H | -0.96703666 | -6.33839443 | 2.95158915  |
| H | -3.41704474 | -6.43498428 | 3.14480207  |
| H | -1.74064598 | -5.02752876 | -6.20272977 |
| H | -4.19065406 | -5.12411861 | -6.00951684 |
| H | 2.14110728  | -5.72657792 | -0.65493561 |
| H | 1.93186596  | -5.37202265 | -3.13094219 |
| H | -7.08955668 | -6.09049039 | 0.07301449  |
| H | -7.29879800 | -5.73593512 | -2.40299209 |
| H | 1.09366659  | -6.07575043 | 1.54282385  |
| H | 0.52929857  | -5.11944000 | -5.13548872 |
| H | -5.68698929 | -6.34307304 | 2.07756102  |
| H | -6.25135732 | -5.38676261 | -4.60075155 |
| C | 4.79290554  | -4.06970098 | 2.75463216  |
| C | 5.20062823  | -2.02236250 | 4.68018841  |

|   |            |             |             |
|---|------------|-------------|-------------|
| C | 4.19859387 | -4.17531864 | 4.03994871  |
| C | 5.59107855 | -2.94041409 | 2.43209374  |
| C | 4.40245522 | -3.15164940 | 5.00272683  |
| C | 5.79493990 | -1.91674485 | 3.39487186  |
| C | 4.58904419 | -5.09337023 | 1.79185404  |
| C | 3.40042086 | -5.30460553 | 4.36248713  |
| C | 6.18539022 | -2.83479644 | 1.14677719  |
| C | 5.40448958 | -0.99869326 | 5.64296653  |
| C | 3.80814355 | -3.25726705 | 6.28804338  |
| C | 6.59311291 | -0.78745796 | 3.07233344  |
| C | 3.19655951 | -6.32827477 | 3.39970901  |
| C | 5.98152887 | -3.85846568 | 0.18399906  |
| C | 4.01200489 | -2.23359781 | 7.25082151  |
| C | 6.79697426 | 0.23621128  | 4.03511156  |
| C | 3.79087117 | -6.22265716 | 2.11439242  |
| C | 5.18335585 | -4.98775262 | 0.50653745  |
| C | 4.81017792 | -1.10431087 | 6.92828312  |
| C | 6.20266260 | 0.13059367  | 5.32042815  |
| C | 2.80610933 | -5.41022306 | 5.64780353  |
| C | 6.98356310 | -1.70550967 | 0.82423892  |
| C | 3.00997067 | -4.38655382 | 6.61058165  |
| C | 7.18742444 | -0.68184043 | 1.78701704  |
| H | 3.63438606 | -7.00843140 | 1.37535854  |
| H | 5.02687074 | -5.77352685 | -0.23249643 |
| H | 4.96666303 | -0.31853663 | 7.66731700  |
| H | 6.35914771 | 0.91636791  | 6.05946203  |
| H | 2.19342717 | -6.27707011 | 5.89538588  |



|   |             |             |             |
|---|-------------|-------------|-------------|
| H | 2.55377364  | -4.46762655 | 7.59719796  |
| H | 7.43976013  | -1.62443694 | -0.16237739 |
| H | 7.80010660  | 0.18500662  | 1.53943469  |
| H | 2.58387748  | -7.19512174 | 3.64729116  |
| H | 3.55580800  | -2.31467037 | 8.23743770  |
| H | 6.43772576  | -3.77739312 | -0.80261713 |
| H | 7.40965629  | 1.10305825  | 3.78752940  |
| C | 2.10680146  | 4.94794808  | -4.03341561 |
| C | -0.23273369 | 3.89632933  | -5.25254350 |
| C | 1.51820187  | 5.61974224  | -5.13733735 |
| C | 1.52563347  | 3.75034454  | -3.53905782 |
| C | 0.34843429  | 5.09393287  | -5.74690129 |
| C | 0.35586590  | 3.22453517  | -4.14862176 |
| C | 3.27656904  | 5.47375745  | -3.42385167 |
| C | 2.09936985  | 6.81734577  | -5.63169514 |
| C | 2.11423306  | 3.07855038  | -2.43513608 |
| C | -1.40250127 | 3.37051996  | -5.86210744 |
| C | -0.24016530 | 5.76572703  | -6.85082303 |
| C | -0.22530209 | 2.02693164  | -3.65426396 |
| C | 3.26913743  | 7.34315514  | -5.02213120 |
| C | 3.28400064  | 3.60435975  | -1.82557213 |
| C | -1.40993288 | 5.23991766  | -7.46038697 |
| C | -1.39506967 | 1.50112227  | -4.26382791 |
| C | 3.85773707  | 6.67136100  | -3.91820944 |
| C | 3.86516868  | 4.80196331  | -2.31992990 |
| C | -1.99110091 | 4.04231410  | -6.96602920 |
| C | -1.98366931 | 2.17291641  | -5.36774967 |

|   |             |             |             |
|---|-------------|-------------|-------------|
| C | 1.51077026  | 7.48913975  | -6.73561673 |
| C | 1.53306508  | 1.88094703  | -1.94077844 |
| C | 0.34100269  | 6.96333038  | -7.34518067 |
| C | 0.36329750  | 1.35513766  | -2.55034238 |
| H | 4.75565721  | 7.07497522  | -3.45030474 |
| H | 4.76308881  | 5.20557752  | -1.85202521 |
| H | -2.88902105 | 3.63869989  | -7.43393390 |
| H | -2.88158944 | 1.76930219  | -5.83565436 |
| H | 1.95687811  | 8.40842705  | -7.11508860 |
| H | -0.11080970 | 7.47900342  | -8.19255729 |
| H | 1.98487747  | 1.36527399  | -1.09340182 |
| H | -0.08281035 | 0.43585036  | -2.17087051 |
| H | 3.71524533  | 8.26244228  | -5.40160290 |
| H | -1.86174531 | 5.75559050  | -8.30776346 |
| H | 3.73581308  | 3.08868691  | -0.97819564 |
| H | -1.84117756 | 0.58183513  | -3.88435621 |
| C | 2.36838328  | 0.95371224  | -6.15378750 |
| C | 4.59814388  | 1.21280380  | -4.41406374 |
| C | 2.61692294  | -0.03564223 | -5.16595865 |
| C | 3.23472392  | 2.07261249  | -6.27175448 |
| C | 3.73180324  | 0.09390355  | -4.29609677 |
| C | 4.34960422  | 2.20215827  | -5.40189260 |
| C | 1.25350299  | 0.82416646  | -7.02364938 |
| C | 1.75058230  | -1.15454247 | -5.04799167 |
| C | 2.98618426  | 3.06196696  | -7.25958334 |
| C | 5.71302418  | 1.34234958  | -3.54420186 |
| C | 3.98034290  | -0.89545092 | -3.30826791 |

|   |             |             |             |
|---|-------------|-------------|-------------|
| C | 5.21594486  | 3.32105852  | -5.51985958 |
| C | 0.63570201  | -1.28408825 | -5.91785355 |
| C | 1.87130397  | 2.93242118  | -8.12944522 |
| C | 5.09522320  | -0.76590514 | -2.43840603 |
| C | 6.33082516  | 3.45060430  | -4.64999770 |
| C | 0.38716230  | -0.29473379 | -6.90568244 |
| C | 1.00496328  | 1.81352093  | -8.01147828 |
| C | 5.96156388  | 0.35299512  | -2.55637297 |
| C | 6.57936486  | 2.46124983  | -3.66216880 |
| C | 1.99912202  | -2.14389674 | -4.06016292 |
| C | 3.85252484  | 4.18086700  | -7.37755020 |
| C | 3.11400232  | -2.01435096 | -3.19030104 |
| C | 4.96740514  | 4.31041278  | -6.50768832 |
| H | -0.46862606 | -0.39417386 | -7.57339329 |
| H | 0.14917492  | 1.71408086  | -8.67918912 |
| H | 6.81735224  | 0.45243518  | -1.88866212 |
| H | 7.43515322  | 2.56068990  | -2.99445796 |
| H | 1.33411402  | -3.00277096 | -3.96961078 |
| H | 3.30478277  | -2.77378510 | -2.43203798 |
| H | 3.66174440  | 4.94030115  | -8.13581326 |
| H | 5.63241315  | 5.16928700  | -6.59824046 |
| H | -0.02930599 | -2.14296227 | -5.82730156 |
| H | 5.28600375  | -1.52533907 | -1.68014304 |
| H | 1.68052341  | 3.69185511  | -8.88770820 |
| H | 6.99583315  | 4.30947832  | -4.74054969 |
| C | -2.95066532 | 3.46958936  | 4.60694813  |
| C | -4.91730751 | 3.63124881  | 2.56445352  |

|   |             |             |             |
|---|-------------|-------------|-------------|
| C | -3.96218199 | 2.47721654  | 4.51513150  |
| C | -2.92246975 | 4.54279190  | 3.67751745  |
| C | -4.94550309 | 2.55804627  | 3.49388420  |
| C | -3.90579084 | 4.62362162  | 2.65627014  |
| C | -1.96734423 | 3.38875963  | 5.62819543  |
| C | -3.99037757 | 1.40401400  | 5.44456218  |
| C | -1.91095308 | 5.53516472  | 3.76933407  |
| C | -5.90062861 | 3.71207853  | 1.54320621  |
| C | -5.95701976 | 1.56567345  | 3.40206757  |
| C | -3.87759526 | 5.69682417  | 1.72683946  |
| C | -3.00705648 | 1.32318427  | 6.46580949  |
| C | -0.92763198 | 5.45433499  | 4.79058138  |
| C | -6.94034086 | 1.64650317  | 2.38082027  |
| C | -4.86091636 | 5.77765389  | 0.70559216  |
| C | -1.99553976 | 2.31555708  | 6.55762616  |
| C | -0.95582752 | 4.38113244  | 5.72001210  |
| C | -6.91214532 | 2.71970572  | 1.45138954  |
| C | -5.87243307 | 4.78528108  | 0.61377549  |
| C | -5.00189414 | 0.41164138  | 5.35274547  |
| C | -1.88275760 | 6.60836706  | 2.83990347  |
| C | -5.98521524 | 0.49247111  | 4.33149817  |
| C | -2.86607869 | 6.68919678  | 1.81865617  |
| H | -1.24073699 | 2.25351173  | 7.34154130  |
| H | -0.20102474 | 4.31908709  | 6.50392725  |
| H | -7.66694809 | 2.78175107  | 0.66747440  |
| H | -6.62723585 | 4.84732643  | -0.17013966 |
| H | -5.02353724 | -0.41215502 | 6.06618176  |

|   |             |             |             |
|---|-------------|-------------|-------------|
| H | -6.76166120 | -0.26927994 | 4.26101922  |
| H | -1.10631164 | 7.37011810  | 2.91038243  |
| H | -2.84443559 | 7.51299318  | 1.10521989  |
| H | -3.02869944 | 0.49938807  | 7.17924573  |
| H | -7.71678675 | 0.88475233  | 2.31034119  |
| H | -0.15118608 | 6.21608583  | 4.86106045  |
| H | -4.83927340 | 6.60145010  | -0.00784409 |
| C | -0.25451977 | -9.45146869 | -0.10124414 |
| C | -0.11462696 | -9.05527265 | -2.90999088 |
| C | -1.44690126 | -9.39079452 | -0.86997369 |
| C | 1.00780811  | -9.31404484 | -0.73688796 |
| C | -1.37695485 | -9.19269650 | -2.27434706 |
| C | 1.07775452  | -9.11594682 | -2.14126133 |
| C | -0.32446618 | -9.64956671 | 1.30312922  |
| C | -2.70922915 | -9.52821837 | -0.23432987 |
| C | 2.20018960  | -9.37471901 | 0.03184159  |
| C | -0.04468056 | -8.85717463 | -4.31436424 |
| C | -2.56933633 | -9.13202233 | -3.04307661 |
| C | 2.34008241  | -8.97852297 | -2.77690514 |
| C | -2.77917555 | -9.72631639 | 1.17004349  |
| C | 2.13024319  | -9.57281704 | 1.43621496  |
| C | -2.49938993 | -8.93392431 | -4.44744997 |
| C | 2.41002882  | -8.78042495 | -4.18127851 |
| C | -1.58679407 | -9.78699057 | 1.93877310  |
| C | 0.86791530  | -9.71024089 | 2.07185883  |
| C | -1.23706204 | -8.79650045 | -5.08309385 |
| C | 1.21764734  | -8.71975077 | -4.95000812 |

|   |             |             |             |
|---|-------------|-------------|-------------|
| C | -3.90161039 | -9.46754419 | -1.00305941 |
| C | 3.46251725  | -9.23729517 | -0.60380224 |
| C | -3.83166399 | -9.26944617 | -2.40743278 |
| C | 3.53246366  | -9.03919715 | -2.00817561 |
| H | -1.64048532 | -9.93905172 | 3.01677796  |
| H | 0.81422405  | -9.86230204 | 3.14986369  |
| H | -1.18337078 | -8.64443930 | -6.16109871 |
| H | 1.27133859  | -8.56768962 | -6.02801297 |
| H | -4.87058049 | -9.57303152 | -0.51513561 |
| H | -4.74694282 | -9.22287233 | -2.99751395 |
| H | 4.37779609  | -9.28386901 | -0.01372107 |
| H | 4.50143375  | -8.93370982 | -2.49609941 |
| H | -3.74814541 | -9.83180372 | 1.65796737  |
| H | -3.41466853 | -8.88735045 | -5.03753119 |
| H | 3.04552179  | -9.61939089 | 2.02629617  |
| H | 3.37899868  | -8.67493762 | -4.66920238 |
| C | -2.01900072 | 2.62523603  | 0.46608205  |
| C | -1.19513156 | 4.82502770  | -1.13008703 |
| C | -0.87440121 | 3.38056021  | 0.83456193  |
| C | -2.75166565 | 2.96980769  | -0.70048237 |
| C | -0.46246663 | 4.48045604  | 0.03647739  |
| C | -2.33973107 | 4.06970353  | -1.49856691 |
| C | -2.43093530 | 1.52534020  | 1.26416659  |
| C | -0.14173628 | 3.03598855  | 2.00112635  |
| C | -3.89626516 | 2.21448352  | -1.06896226 |
| C | -0.78319697 | 5.92492354  | -1.92817157 |
| C | 0.68213289  | 5.23578022  | 0.40495728  |

|   |             |             |             |
|---|-------------|-------------|-------------|
| C | -3.07239600 | 4.41427519  | -2.66513133 |
| C | -0.55367086 | 1.93609271  | 2.79921089  |
| C | -4.30819974 | 1.11458768  | -0.27087772 |
| C | 1.09406747  | 6.33567606  | -0.39312726 |
| C | -2.66046141 | 5.51417102  | -3.46321587 |
| C | -1.69827039 | 1.18076849  | 2.43073104  |
| C | -3.57553483 | 0.77001598  | 0.89568674  |
| C | 0.36140255  | 6.68024776  | -1.55969172 |
| C | -1.51586189 | 6.26949525  | -3.09473602 |
| C | 1.00286305  | 3.79131269  | 2.36960609  |
| C | -4.62892991 | 2.55905522  | -2.23552653 |
| C | 1.41479763  | 4.89120852  | 1.57152155  |
| C | -4.21699533 | 3.65895105  | -3.03361107 |
| H | -2.01447368 | 0.33648229  | 3.04334520  |
| H | -3.89173812 | -0.07427022 | 1.50830089  |
| H | 0.67760585  | 7.52453396  | -2.17230587 |
| H | -1.19965860 | 7.11378144  | -3.70735018 |
| H | 1.56526084  | 3.52681753  | 3.26506759  |
| H | 2.29339875  | 5.47099966  | 1.85436882  |
| H | -5.50753102 | 1.97926408  | -2.51837380 |
| H | -4.77939312 | 3.92344621  | -3.92907257 |
| H | 0.00872673  | 1.67159747  | 3.69467228  |
| H | 1.97266842  | 6.91546720  | -0.11028017 |
| H | -5.18680069 | 0.53479654  | -0.55372481 |
| H | -3.22285901 | 5.77866627  | -4.35867726 |
| C | 5.76193719  | -6.87783524 | -7.99828458 |
| C | 8.10453552  | -6.00831818 | -6.64855398 |

|   |             |             |              |
|---|-------------|-------------|--------------|
| C | 6.39861681  | -5.66976183 | -8.38764017  |
| C | 6.29655674  | -7.65115012 | -6.93406368  |
| C | 7.56991597  | -5.23500330 | -7.71277487  |
| C | 7.46785591  | -7.21639159 | -6.25919838  |
| C | 4.59063803  | -7.31259377 | -8.67314988  |
| C | 5.86399726  | -4.89644695 | -9.45186106  |
| C | 5.65987713  | -8.85922354 | -6.54470809  |
| C | 9.27583468  | -5.57355965 | -5.97368868  |
| C | 8.20659558  | -4.02692988 | -8.10213046  |
| C | 8.00247546  | -7.98970647 | -5.19497749  |
| C | 4.69269809  | -5.33120548 | -10.12672636 |
| C | 4.48857797  | -9.29398207 | -7.21957339  |
| C | 9.37789474  | -3.59217135 | -7.42726516  |
| C | 9.17377462  | -7.55494794 | -4.52011219  |
| C | 4.05601843  | -6.53927891 | -9.73737080  |
| C | 3.95395837  | -8.52066721 | -8.28379431  |
| C | 9.91251434  | -4.36548622 | -6.36304424  |
| C | 9.81045428  | -6.34687451 | -4.90946776  |
| C | 6.50067686  | -3.68837373 | -9.84121651  |
| C | 6.19449669  | -9.63253823 | -5.48048734  |
| C | 7.67197602  | -3.25361519 | -9.16635121  |
| C | 7.36579586  | -9.19777970 | -4.80562204  |
| H | 3.15692264  | -6.87300199 | -10.25540118 |
| H | 3.05486258  | -8.85439029 | -8.80182469  |
| H | 10.81161013 | -4.03176313 | -5.84501386  |
| H | 10.70955007 | -6.01315143 | -4.39143738  |
| H | 6.09029985  | -3.09477280 | -10.65811854 |



|   |             |              |              |
|---|-------------|--------------|--------------|
| H | 8.16069490  | -2.32629115  | -9.46522280  |
| H | 5.70577781  | -10.55986227 | -5.18161576  |
| H | 7.77617286  | -9.79138062  | -3.98872002  |
| H | 4.28232103  | -4.73760476  | -10.94362827 |
| H | 9.86661366  | -2.66484748  | -7.72613658  |
| H | 3.99985905  | -10.22130594 | -6.92070198  |
| H | 9.58415168  | -8.14854866  | -3.70321028  |
| C | -3.98737031 | -2.09789072  | -1.97175601  |
| C | -5.90115455 | -2.42571775  | 0.10081699   |
| C | -3.55721915 | -2.30345395  | -0.63417842  |
| C | -5.37441359 | -2.05624100  | -2.27304710  |
| C | -4.51411127 | -2.46736746  | 0.40210809   |
| C | -6.33130571 | -2.22015452  | -1.23676060  |
| C | -3.03047819 | -1.93397720  | -3.00804251  |
| C | -2.17017587 | -2.34510366  | -0.33288732  |
| C | -5.80456475 | -1.85067777  | -3.61062469  |
| C | -6.85804666 | -2.58963126  | 1.13710350   |
| C | -4.08396011 | -2.67293070  | 1.73968568   |
| C | -7.71834899 | -2.17850480  | -1.53805169  |
| C | -1.21328375 | -2.18119015  | -1.36917382  |
| C | -4.84767263 | -1.68676425  | -4.64691119  |
| C | -5.04085223 | -2.83684421  | 2.77597218   |
| C | -8.67524110 | -2.34241832  | -0.50176519  |
| C | -1.64343487 | -1.97562691  | -2.70675146  |
| C | -3.46062931 | -1.72841396  | -4.34562014  |
| C | -6.42789555 | -2.79519450  | 2.47468113   |
| C | -8.24508998 | -2.54798155  | 0.83581245   |

|   |             |             |             |
|---|-------------|-------------|-------------|
| C | -1.74002489 | -2.55066687 | 1.00469011  |
| C | -7.19160785 | -1.80902808 | -3.91191562 |
| C | -2.69691701 | -2.71458039 | 2.04097661  |
| C | -8.14849997 | -1.97294159 | -2.87562912 |
| H | -0.90891913 | -1.84980598 | -3.50221078 |
| H | -2.72611357 | -1.60259303 | -5.14107946 |
| H | -7.16241129 | -2.92101543 | 3.27014045  |
| H | -8.97960573 | -2.67380249 | 1.63127177  |
| H | -0.67532256 | -2.58263743 | 1.23596289  |
| H | -2.36673050 | -2.87237190 | 3.06770879  |
| H | -7.52179435 | -1.65123657 | -4.93864780 |
| H | -9.21320230 | -1.94097103 | -3.10690190 |
| H | -0.14858156 | -2.21316068 | -1.13790125 |
| H | -4.71066594 | -2.99463570 | 3.80270425  |
| H | -5.17785892 | -1.52897276 | -5.67364326 |
| H | -9.73994330 | -2.31044778 | -0.73303776 |
| C | 6.41686624  | -3.20986526 | -4.83471366 |
| C | 5.37033217  | -1.65793965 | -6.97057248 |
| C | 5.24705931  | -3.63776730 | -5.51651397 |
| C | 7.06340613  | -2.00600042 | -5.22084276 |
| C | 4.72379227  | -2.86180450 | -6.58444338 |
| C | 6.54013910  | -1.23003761 | -6.28877216 |
| C | 6.94013327  | -3.98582806 | -3.76678425 |
| C | 4.60051941  | -4.84163214 | -5.13038488 |
| C | 8.23321307  | -1.57809838 | -4.53904244 |
| C | 4.84706514  | -0.88197685 | -8.03850188 |
| C | 3.55398534  | -3.28970654 | -7.26624370 |

|   |            |             |             |
|---|------------|-------------|-------------|
| C | 7.18667900 | -0.02617277 | -6.67490126 |
| C | 5.12378644 | -5.61759494 | -4.06245547 |
| C | 8.75648010 | -2.35406118 | -3.47111304 |
| C | 3.03071831 | -2.51374373 | -8.33417310 |
| C | 6.66341197 | 0.74979003  | -7.74283067 |
| C | 6.29359339 | -5.18969294 | -3.38065511 |
| C | 8.10994022 | -3.55792606 | -3.08498390 |
| C | 3.67725819 | -1.30987886 | -8.72030224 |
| C | 5.49360502 | 0.32188802  | -8.42463102 |
| C | 3.43071265 | -5.26953402 | -5.81218516 |
| C | 8.87975279 | -0.37423369 | -4.92517157 |
| C | 2.90744562 | -4.49357122 | -6.88011457 |
| C | 8.35648576 | 0.40172911  | -5.99310097 |
| H | 6.69525609 | -5.78532633 | -2.56090652 |
| H | 8.51160292 | -4.15355945 | -2.26523531 |
| H | 3.27559549 | -0.71424547 | -9.54005083 |
| H | 5.09194231 | 0.91752141  | -9.24437961 |
| H | 2.93442493 | -6.19362754 | -5.51579028 |
| H | 2.00949515 | -4.82203128 | -7.40346837 |
| H | 9.77770326 | -0.04577363 | -4.40181777 |
| H | 8.85277348 | 1.32582263  | -6.28949586 |
| H | 4.62749891 | -6.54168834 | -3.76606052 |
| H | 2.13276799 | -2.84220360 | -8.85752692 |
| H | 9.65443042 | -2.02560131 | -2.94775922 |
| H | 7.15969950 | 1.67388342  | -8.03922562 |
| K | 0.20465800 | 0.10074000  | 0.48149700  |

n = 13, Energy = -1276.20798706

|   |            |             |             |
|---|------------|-------------|-------------|
| C | 6.35656911 | -0.14963433 | -1.95803772 |
| C | 5.07257259 | -1.66041778 | -3.99138123 |
| C | 6.42347840 | -1.56791790 | -1.93816495 |
| C | 5.64766156 | 0.51325752  | -2.99458225 |
| C | 5.78148014 | -2.32330963 | -2.95483670 |
| C | 5.00566330 | -0.24213420 | -4.01125400 |
| C | 6.99856737 | 0.60575740  | -0.94136597 |
| C | 7.13238595 | -2.23080975 | -0.90162042 |
| C | 5.58075227 | 1.93154110  | -3.01445502 |
| C | 4.43057432 | -2.41580950 | -5.00805298 |
| C | 5.84838942 | -3.74159320 | -2.93496392 |
| C | 4.29675575 | 0.42075765  | -5.04779853 |
| C | 7.77438421 | -1.47541803 | 0.11505133  |
| C | 6.22275054 | 2.68693282  | -1.99778327 |
| C | 5.20639116 | -4.49698493 | -3.95163568 |
| C | 3.65475749 | -0.33463408 | -6.06447028 |
| C | 7.70747495 | -0.05713442 | 0.09517860  |
| C | 6.93165811 | 2.02404100  | -0.96123870 |
| C | 4.49748358 | -3.83409311 | -4.98818025 |
| C | 3.72166675 | -1.75291768 | -6.04459755 |
| C | 7.19929516 | -3.64909313 | -0.88174775 |
| C | 4.87184480 | 2.59443274  | -4.05099945 |
| C | 6.55729690 | -4.40448485 | -1.89841950 |
| C | 4.22984654 | 1.83904102  | -5.06767120 |
| H | 8.20027641 | 0.52270849  | 0.87558153  |
| H | 7.42445957 | 2.60388392  | -0.18083578 |

|   |             |             |             |
|---|-------------|-------------|-------------|
| H | 4.00468212  | -4.41393602 | -5.76858317 |
| H | 3.22886529  | -2.33276060 | -6.82500048 |
| H | 7.74345664  | -4.15793271 | -0.08609026 |
| H | 6.60865686  | -5.49316741 | -1.88316503 |
| H | 4.82048484  | 3.68311530  | -4.06625392 |
| H | 3.68568506  | 2.34788060  | -5.86332869 |
| H | 8.31854564  | -1.98425738 | 0.91070876  |
| H | 5.25775102  | -5.58566732 | -3.93638135 |
| H | 6.17139068  | 3.77561521  | -2.01303760 |
| H | 3.11059606  | 0.17420527  | -6.86012771 |
| C | 1.82452048  | 6.54724756  | 0.80804605  |
| C | -0.96793471 | 7.03231437  | 0.62775818  |
| C | 1.19130014  | 7.40682803  | 1.74429041  |
| C | 1.06151322  | 5.93020050  | -0.21834224 |
| C | -0.20492746 | 7.64936143  | 1.65414647  |
| C | -0.33471437 | 6.17273390  | -0.30848618 |
| C | 3.22074807  | 6.30471416  | 0.89818998  |
| C | 1.95430739  | 8.02387509  | 2.77067870  |
| C | 1.69473356  | 5.07062003  | -1.15458660 |
| C | -2.36416231 | 7.27484777  | 0.53761425  |
| C | -0.83814780 | 8.50894190  | 2.59039083  |
| C | -1.09772163 | 5.55568684  | -1.33487447 |
| C | 3.35053499  | 7.78134169  | 2.86082263  |
| C | 3.09096116  | 4.82808663  | -1.06444267 |
| C | -2.23437539 | 8.75147530  | 2.50024690  |
| C | -2.49394922 | 5.79822024  | -1.42501840 |
| C | 3.98375539  | 6.92176121  | 1.92457828  |

|   |             |             |             |
|---|-------------|-------------|-------------|
| C | 3.85396847  | 5.44513368  | -0.03805437 |
| C | -2.99738271 | 8.13442825  | 1.47385860  |
| C | -3.12716962 | 6.65780072  | -0.48877405 |
| C | 1.32108704  | 8.88345542  | 3.70692287  |
| C | 0.93172632  | 4.45357311  | -2.18097471 |
| C | -0.07514056 | 9.12598882  | 3.61677893  |
| C | -0.46450128 | 4.69610651  | -2.27111864 |
| H | 5.05550750  | 6.73559122  | 1.99377327  |
| H | 4.92572059  | 5.25896369  | 0.03114061  |
| H | -4.06913482 | 8.32059824  | 1.40466361  |
| H | -4.19892174 | 6.84397071  | -0.55796904 |
| H | 1.90677574  | 9.35710427  | 4.49478438  |
| H | -0.56120409 | 9.78580769  | 4.33544545  |
| H | 1.41778985  | 3.79375424  | -2.89964122 |
| H | -1.05018998 | 4.22245766  | -3.05898015 |
| H | 3.93622374  | 8.25499039  | 3.64868396  |
| H | -2.72043899 | 9.41129404  | 3.21891322  |
| H | 3.57702476  | 4.16826789  | -1.78310899 |
| H | -3.07963797 | 5.32457154  | -2.21287973 |
| C | -3.78863024 | -0.89502948 | -1.60268033 |
| C | -6.52200727 | -1.59974524 | -1.29022992 |
| C | -4.77233901 | 0.11985478  | -1.46583342 |
| C | -4.17160999 | -2.26227162 | -1.58330203 |
| C | -6.13902752 | -0.23250310 | -1.30960822 |
| C | -5.53829850 | -2.61462950 | -1.42707683 |
| C | -2.42194173 | -0.54267160 | -1.75890553 |
| C | -4.38935926 | 1.48709692  | -1.48521171 |

|   |             |             |             |
|---|-------------|-------------|-------------|
| C | -3.18790123 | -3.27715588 | -1.72014894 |
| C | -7.88869578 | -1.95210312 | -1.13400472 |
| C | -7.12273629 | 0.78238116  | -1.17276131 |
| C | -5.92127825 | -3.98187164 | -1.40769854 |
| C | -3.02267075 | 1.83945480  | -1.64143692 |
| C | -1.82121271 | -2.92479801 | -1.87637414 |
| C | -8.48942480 | 0.43002328  | -1.01653611 |
| C | -7.28796676 | -4.33422952 | -1.25147333 |
| C | -2.03896193 | 0.82457055  | -1.77828383 |
| C | -1.43823291 | -1.55755585 | -1.89575244 |
| C | -8.87240460 | -0.93721887 | -0.99715781 |
| C | -8.27167559 | -3.31934527 | -1.11462642 |
| C | -5.37306797 | 2.50198095  | -1.34836482 |
| C | -3.57088103 | -4.64439779 | -1.70077064 |
| C | -6.73975648 | 2.14962307  | -1.19213961 |
| C | -4.93756954 | -4.99675567 | -1.54454543 |
| H | -0.98988418 | 1.09504243  | -1.89820317 |
| H | -0.38915516 | -1.28708397 | -2.01567178 |
| H | -9.92148235 | -1.20769075 | -0.87723847 |
| H | -9.32075334 | -3.58981715 | -0.99470708 |
| H | -5.07909055 | 3.55148382  | -1.36323970 |
| H | -7.49485693 | 2.92865403  | -1.08709515 |
| H | -2.81578058 | -5.42342876 | -1.80581510 |
| H | -5.23154696 | -6.04625854 | -1.52967055 |
| H | -2.72869322 | 2.88895745  | -1.65631182 |
| H | -9.24452524 | 1.20905400  | -0.91149165 |
| H | -1.06611227 | -3.70382872 | -1.98141860 |

|   |             |             |             |
|---|-------------|-------------|-------------|
| H | -7.58194430 | -5.38373218 | -1.23659843 |
| C | -4.30264074 | -1.15355962 | -5.12198893 |
| C | -2.90836430 | 1.31912207  | -5.20823282 |
| C | -2.88879334 | -1.13989879 | -5.25332440 |
| C | -5.01934992 | 0.06912039  | -5.03377541 |
| C | -2.19165513 | 0.09644206  | -5.29644634 |
| C | -4.32221170 | 1.30546123  | -5.07689735 |
| C | -4.99977895 | -2.38990047 | -5.07886699 |
| C | -2.17208417 | -2.36257880 | -5.34153793 |
| C | -6.43319731 | 0.05545955  | -4.90243994 |
| C | -2.21122609 | 2.55546291  | -5.25135476 |
| C | -0.77780773 | 0.11010289  | -5.42778181 |
| C | -5.03892088 | 2.52814124  | -4.98868382 |
| C | -2.86922238 | -3.59891964 | -5.29841599 |
| C | -7.13033553 | -1.18088129 | -4.85931800 |
| C | -0.08066952 | 1.34644374  | -5.47090376 |
| C | -4.34178266 | 3.76448209  | -5.03180576 |
| C | -4.28306981 | -3.61258053 | -5.16708052 |
| C | -6.41362638 | -2.40356135 | -4.94753152 |
| C | -0.79737867 | 2.56912380  | -5.38269023 |
| C | -2.92793524 | 3.77814297  | -5.16314123 |
| C | -0.75823698 | -2.34891784 | -5.47287338 |
| C | -7.14990628 | 1.27813945  | -4.81422643 |
| C | -0.06109876 | -1.11257700 | -5.51599532 |
| C | -6.45276806 | 2.51448029  | -4.85734837 |
| H | -4.81819700 | -4.56160268 | -5.13397987 |
| H | -6.94875357 | -3.35258350 | -4.91443088 |



|   |             |             |             |
|---|-------------|-------------|-------------|
| H | -0.26225147 | 3.51814595  | -5.41579087 |
| H | -2.39280804 | 4.72716512  | -5.19624188 |
| H | -0.20808691 | -3.28745398 | -5.54058659 |
| H | 1.02417856  | -1.10209088 | -5.61680918 |
| H | -8.23518360 | 1.26765333  | -4.71341257 |
| H | -7.00291813 | 3.45301643  | -4.78963516 |
| H | -2.31907255 | -4.53745572 | -5.36612917 |
| H | 1.00460763  | 1.35693002  | -5.57171759 |
| H | -8.21561267 | -1.19136758 | -4.75850416 |
| H | -4.89193249 | 4.70301816  | -4.96409258 |
| C | -2.80308522 | 0.26828797  | -8.80392611 |
| C | -0.84474234 | 2.32088525  | -8.93559641 |
| C | -3.19881977 | 1.63122406  | -8.75702781 |
| C | -1.42817923 | -0.06834948 | -8.91665957 |
| C | -2.21964833 | 2.65752270  | -8.82286296 |
| C | -0.44900779 | 0.95794916  | -8.98249472 |
| C | -3.78225666 | -0.75801068 | -8.73809096 |
| C | -4.57372575 | 1.96786151  | -8.64429435 |
| C | -1.03244468 | -1.43128557 | -8.96355787 |
| C | 0.13442910  | 3.34718390  | -9.00143156 |
| C | -2.61538288 | 4.02045880  | -8.77596465 |
| C | 0.92589819  | 0.62131171  | -9.09522817 |
| C | -5.55289719 | 0.94156287  | -8.57845920 |
| C | -2.01161612 | -2.45758422 | -8.89772272 |
| C | -1.63621144 | 5.04675744  | -8.84179980 |
| C | 1.90506963  | 1.64761036  | -9.16106332 |
| C | -5.15716268 | -0.42137327 | -8.62535750 |

|   |             |             |             |
|---|-------------|-------------|-------------|
| C | -3.38652215 | -2.12094681 | -8.78498926 |
| C | -0.26130541 | 4.71012003  | -8.95453326 |
| C | 1.50933512  | 3.01054649  | -9.11416502 |
| C | -4.96946013 | 3.33079744  | -8.59739606 |
| C | 0.34246113  | -1.76792286 | -9.07629131 |
| C | -3.99028869 | 4.35709608  | -8.66323121 |
| C | 1.32163257  | -0.74162422 | -9.14212646 |
| H | -5.90878016 | -1.20916585 | -8.57482207 |
| H | -4.13813963 | -2.90873939 | -8.73445383 |
| H | 0.49031207  | 5.49791262  | -9.00506869 |
| H | 2.26095260  | 3.79833907  | -9.16470045 |
| H | -6.02484580 | 3.58920228  | -8.51086122 |
| H | -4.29405681 | 5.40329359  | -8.62723181 |
| H | 0.64622925  | -2.81412037 | -9.11229072 |
| H | 2.37701824  | -1.00002906 | -9.22866130 |
| H | -6.60828273 | 1.19996750  | -8.49192437 |
| H | -1.93997934 | 6.09295483  | -8.80580041 |
| H | -1.70784822 | -3.50378161 | -8.93372211 |
| H | 2.96045517  | 1.38920572  | -9.24759815 |
| C | 3.37319516  | -3.21974929 | -0.15445591 |
| C | 4.37144902  | -1.10704801 | 1.45972563  |
| C | 4.12105803  | -3.51328562 | 1.01641454  |
| C | 3.12445922  | -1.86986231 | -0.51823560 |
| C | 4.62018496  | -2.45693498 | 1.82350531  |
| C | 3.62358615  | -0.81351167 | 0.28885517  |
| C | 2.87406823  | -4.27609993 | -0.96154668 |
| C | 4.36979397  | -4.86317260 | 1.38019423  |

|   |            |             |             |
|---|------------|-------------|-------------|
| C | 2.37659635 | -1.57632597 | -1.68910605 |
| C | 4.87057595 | -0.05069737 | 2.26681640  |
| C | 5.36804783 | -2.75047132 | 2.99437577  |
| C | 3.37485020 | 0.53637531  | -0.07492451 |
| C | 3.87066705 | -5.91952324 | 0.57310346  |
| C | 1.87746942 | -2.63267662 | -2.49619682 |
| C | 5.86717476 | -1.69412068 | 3.80146654  |
| C | 3.87397713 | 1.59272595  | 0.73216626  |
| C | 3.12280415 | -5.62598695 | -0.59776703 |
| C | 2.12620534 | -3.98256364 | -2.13241717 |
| C | 5.61843884 | -0.34423366 | 3.43768689  |
| C | 4.62184002 | 1.29918966  | 1.90303675  |
| C | 5.11765675 | -5.15670878 | 2.55106453  |
| C | 2.12786050 | -0.22643916 | -2.05288559 |
| C | 5.61678368 | -4.10035813 | 3.35815530  |
| C | 2.62698743 | 0.82991148  | -1.24579482 |
| H | 2.73967153 | -6.43684761 | -1.21729442 |
| H | 1.74307272 | -4.79342430 | -2.75194456 |
| H | 6.00157146 | 0.46662701  | 4.05721428  |
| H | 5.00497265 | 2.11005032  | 2.52256414  |
| H | 5.30858789 | -6.19288971 | 2.83030391  |
| H | 6.19084748 | -4.32567832 | 4.25692214  |
| H | 1.55379670 | -0.00111897 | -2.95165242 |
| H | 2.43605629 | 1.86609242  | -1.52503419 |
| H | 4.06159807 | -6.95570406 | 0.85234265  |
| H | 6.44123849 | -1.91944066 | 4.70023326  |
| H | 1.30340569 | -2.40735663 | -3.39496354 |

|   |            |             |             |
|---|------------|-------------|-------------|
| H | 3.68304611 | 2.62890677  | 0.45292706  |
| C | 7.69820398 | -0.93962351 | -6.44221069 |
| C | 7.15910540 | 1.76556133  | -7.11818940 |
| C | 6.93159948 | -0.63588980 | -7.59826582 |
| C | 8.19525919 | 0.10923520  | -5.62414492 |
| C | 6.66205019 | 0.71670262  | -7.93625517 |
| C | 7.92570990 | 1.46182762  | -5.96213428 |
| C | 7.96775328 | -2.29221593 | -6.10422133 |
| C | 6.43454427 | -1.68474851 | -8.41633158 |
| C | 8.96186370 | -0.19449851 | -4.46808980 |
| C | 6.88955611 | 3.11815375  | -7.45617876 |
| C | 5.89544569 | 1.02043633  | -9.09231030 |
| C | 8.42276511 | 2.51068633  | -5.14406851 |
| C | 6.70409356 | -3.03734093 | -8.07834223 |
| C | 9.23141299 | -1.54709093 | -4.13010044 |
| C | 5.62589640 | 2.37302875  | -9.43029965 |
| C | 8.15321582 | 3.86327875  | -5.48205787 |
| C | 7.47069808 | -3.34107470 | -6.92228709 |
| C | 8.73435779 | -2.59594969 | -4.94816620 |
| C | 6.12295160 | 3.42188751  | -8.61223390 |
| C | 7.38661131 | 4.16701252  | -6.63811301 |
| C | 5.66793990 | -1.38101473 | -9.57238652 |
| C | 9.45891878 | 0.85436013  | -3.65002422 |
| C | 5.39839060 | -0.02842231 | -9.91037587 |
| C | 9.18936949 | 2.20695255  | -3.98801358 |
| H | 7.67760562 | -4.37933221 | -6.66284457 |
| H | 8.94126533 | -3.63420721 | -4.68872368 |

|   |             |             |              |
|---|-------------|-------------|--------------|
| H | 5.91604406  | 4.46014503  | -8.87167642  |
| H | 7.17970377  | 5.20527003  | -6.89755553  |
| H | 5.28639747  | -2.18612465 | -10.20033848 |
| H | 4.80994062  | 0.20472540  | -10.79777038 |
| H | 10.04736877 | 0.62121242  | -2.76262971  |
| H | 9.57091192  | 3.01206247  | -3.36006162  |
| H | 6.32255128  | -3.84245083 | -8.70629398  |
| H | 5.03744652  | 2.60617659  | -10.31769399 |
| H | 9.81986286  | -1.78023876 | -3.24270611  |
| H | 8.53475811  | 4.66838865  | -4.85410611  |
| C | 2.88139478  | 10.41350311 | -5.70916238  |
| C | 4.24256017  | 8.71334984  | -7.53188210  |
| C | 4.27991061  | 10.20575969 | -5.57726766  |
| C | 2.16346164  | 9.77116989  | -6.75241697  |
| C | 4.96049331  | 9.35568306  | -6.48862752  |
| C | 2.84404434  | 8.92109326  | -7.66377683  |
| C | 2.20081209  | 11.26357974 | -4.79780253  |
| C | 4.99784375  | 10.84809291 | -4.53401307  |
| C | 0.76494581  | 9.97891331  | -6.88431169  |
| C | 4.92314286  | 7.86327320  | -8.44324196  |
| C | 6.35900914  | 9.14793964  | -6.35673279  |
| C | 2.12611120  | 8.27876004  | -8.70703141  |
| C | 4.31726105  | 11.69816954 | -3.62265322  |
| C | 0.08436312  | 10.82898995 | -5.97295184  |
| C | 7.03959183  | 8.29786300  | -7.26809265  |
| C | 2.80669390  | 7.42868341  | -9.61839127  |
| C | 2.91874519  | 11.90591300 | -3.75454790  |

|   |             |             |              |
|---|-------------|-------------|--------------|
| C | 0.80229623  | 11.47132320 | -4.92969722  |
| C | 6.32165872  | 7.65552975  | -8.31134727  |
| C | 4.20520975  | 7.22093995  | -9.48649658  |
| C | 6.39635937  | 10.64034945 | -4.40211846  |
| C | 0.04701288  | 9.33658014  | -7.92756616  |
| C | 7.07694207  | 9.79027281  | -5.31347832  |
| C | 0.72759558  | 8.48650350  | -8.83892602  |
| H | 2.39632611  | 12.55843658 | -3.05498298  |
| H | 0.27987714  | 12.12384678 | -4.23013229  |
| H | 6.84407781  | 7.00300617  | -9.01091219  |
| H | 4.72762884  | 6.56841637  | -10.18606151 |
| H | 6.94744896  | 11.13340808 | -3.60131030  |
| H | 8.15045080  | 9.63080779  | -5.21223516  |
| H | -1.02649585 | 9.49604516  | -8.02880932  |
| H | 0.17650599  | 7.99344487  | -9.63973418  |
| H | 4.86835041  | 12.19122817 | -2.82184513  |
| H | 8.11310038  | 8.13839790  | -7.16684964  |
| H | -0.98914543 | 10.98845505 | -6.07419484  |
| H | 2.25560454  | 6.93562478  | -10.41919935 |
| C | -2.65178618 | 1.12181261  | 4.57263078   |
| C | -0.34726607 | -0.37736070 | 3.86040470   |
| C | -2.73876291 | 0.11889292  | 3.57113828   |
| C | -1.41254940 | 1.37514564  | 5.21801024   |
| C | -1.58650285 | -0.63069373 | 3.21502524   |
| C | -0.26028935 | 0.62555899  | 4.86189720   |
| C | -3.80404624 | 1.87139926  | 4.92874382   |
| C | -3.97799969 | -0.13444011 | 2.92575881   |

|   |             |             |            |
|---|-------------|-------------|------------|
| C | -1.32557267 | 2.37806533  | 6.21950274 |
| C | 0.80499398  | -1.12694735 | 3.50429166 |
| C | -1.67347958 | -1.63361342 | 2.21353274 |
| C | 0.97894744  | 0.87889202  | 5.50727667 |
| C | -5.13025974 | 0.61514654  | 3.28187185 |
| C | -2.47783273 | 3.12765198  | 6.57561578 |
| C | -0.52121953 | -2.38320007 | 1.85741970 |
| C | 2.13120749  | 0.12930537  | 5.15116363 |
| C | -5.04328307 | 1.61806626  | 4.28336437 |
| C | -3.71706956 | 2.87431898  | 5.93023633 |
| C | 0.71801730  | -2.12986707 | 2.50279915 |
| C | 2.04423081  | -0.87361435 | 4.14967111 |
| C | -4.06497629 | -1.13735968 | 1.92426647 |
| C | -0.08633602 | 2.63139824  | 6.86488204 |
| C | -2.91271623 | -1.88694633 | 1.56815344 |
| C | 1.06592403  | 1.88181159  | 6.50876901 |
| H | -5.92776433 | 2.19345317  | 4.55671873 |
| H | -4.60155082 | 3.44970589  | 6.20359069 |
| H | 1.60249857  | -2.70525398 | 2.22944479 |
| H | 2.92871208  | -1.44900126 | 3.87631675 |
| H | -5.01622150 | -1.33181957 | 1.42886951 |
| H | -2.97948008 | -2.65679320 | 0.79940208 |
| H | -0.01957217 | 3.40124511  | 7.63363340 |
| H | 2.01716925  | 2.07627148  | 7.00416597 |
| H | -6.08150488 | 0.42068680  | 2.78647506 |
| H | -0.58798320 | -3.15304685 | 1.08866849 |
| H | -2.41106906 | 3.89749876  | 7.34436699 |

|   |             |             |             |
|---|-------------|-------------|-------------|
| H | 3.08245262  | 0.32376511  | 5.64656042  |
| C | 1.72946366  | 7.36284793  | -4.06464746 |
| C | 2.61445373  | 8.88785185  | -1.83827033 |
| C | 3.09878637  | 7.34235638  | -3.68923372 |
| C | 0.80263598  | 8.14584144  | -3.32687264 |
| C | 3.54128141  | 8.10485834  | -2.57604515 |
| C | 1.24513101  | 8.90834340  | -2.21368407 |
| C | 1.28696862  | 6.60034597  | -5.17783602 |
| C | 4.02561405  | 6.55936286  | -4.42700854 |
| C | -0.56668674 | 8.16633300  | -3.70228638 |
| C | 3.05694876  | 9.65035381  | -0.72508176 |
| C | 4.91060412  | 8.08436678  | -2.20063141 |
| C | 0.31830334  | 9.69133692  | -1.47590925 |
| C | 3.58311901  | 5.79686090  | -5.54019711 |
| C | -1.00918177 | 7.40383104  | -4.81547494 |
| C | 5.35309916  | 8.84686874  | -1.08744284 |
| C | 0.76079837  | 10.45383888 | -0.36272068 |
| C | 2.21379628  | 5.81735243  | -5.91561089 |
| C | -0.08235411 | 6.62083749  | -5.55324981 |
| C | 4.42627150  | 9.62986229  | -0.34966797 |
| C | 2.13012111  | 10.43334736 | 0.01269311  |
| C | 5.39493654  | 6.53887139  | -4.05159476 |
| C | -1.49351419 | 8.94932643  | -2.96451159 |
| C | 5.83743158  | 7.30137335  | -2.93840620 |
| C | -1.05101915 | 9.71182839  | -1.85132302 |
| H | 1.87413461  | 5.23205165  | -6.77010067 |
| H | -0.42201578 | 6.03553672  | -6.40773959 |



|   |             |             |              |
|---|-------------|-------------|--------------|
| H | 4.76593316  | 10.21516306 | 0.50482180   |
| H | 2.46978277  | 11.01864813 | 0.86718288   |
| H | 6.10637477  | 5.93784111  | -4.61791491  |
| H | 6.88853150  | 7.28564390  | -2.65023648  |
| H | -2.54461412 | 8.96505588  | -3.25268130  |
| H | -1.76245738 | 10.31285867 | -1.28500287  |
| H | 4.29455700  | 5.19583067  | -6.10651727  |
| H | 6.40419888  | 8.83113941  | -0.79927305  |
| H | -2.06028150 | 7.41956037  | -5.10364474  |
| H | 0.04936039  | 11.05486911 | 0.20359948   |
| C | 0.45698641  | 1.81064674  | -12.66110035 |
| C | -0.90263104 | 4.30107982  | -12.53951516 |
| C | -0.95522692 | 1.84224263  | -12.51599598 |
| C | 1.18939102  | 3.02426739  | -12.74541212 |
| C | -1.63503564 | 3.08745917  | -12.45520338 |
| C | 0.50958230  | 4.26948394  | -12.68461953 |
| C | 1.13679514  | 0.56543020  | -12.72189294 |
| C | -1.68763153 | 0.62862197  | -12.43168420 |
| C | 2.60160435  | 2.99267151  | -12.89051649 |
| C | -1.58243976 | 5.54629636  | -12.47872256 |
| C | -3.04724898 | 3.11905506  | -12.31009901 |
| C | 1.24198690  | 5.48310459  | -12.76893130 |
| C | -1.00782280 | -0.61659457 | -12.49247680 |
| C | 3.28141308  | 1.74745497  | -12.95130909 |
| C | -3.72705770 | 4.36427160  | -12.24930641 |
| C | 0.56217818  | 6.72832113  | -12.70813871 |
| C | 0.40439056  | -0.64819051 | -12.63758117 |

|   |             |             |              |
|---|-------------|-------------|--------------|
| C | 2.54900850  | 0.53383426  | -12.86699732 |
| C | -2.99465312 | 5.57789230  | -12.33361819 |
| C | -0.85003518 | 6.75991707  | -12.56303433 |
| C | -3.09984465 | 0.66021797  | -12.28657985 |
| C | 3.33400875  | 4.20629205  | -12.97482825 |
| C | -3.77965338 | 1.90543452  | -12.22578726 |
| C | 2.65420003  | 5.45150859  | -12.91403565 |
| H | 0.92621554  | -1.60402569 | -12.68424591 |
| H | 3.07083348  | -0.42200093 | -12.91366205 |
| H | -3.51647811 | 6.53372749  | -12.28695345 |
| H | -1.37186017 | 7.71575226  | -12.51636960 |
| H | -3.66204262 | -0.27136415 | -12.22186165 |
| H | -4.86367639 | 1.92968768  | -12.11440431 |
| H | 4.41803176  | 4.18203888  | -13.08621119 |
| H | 3.21639800  | 6.38309071  | -12.97875385 |
| H | -1.57002053 | -1.54817663 | -12.42775862 |
| H | -4.81108053 | 4.38852493  | -12.13792349 |
| H | 4.36543591  | 1.72320163  | -13.06269201 |
| H | 1.12437591  | 7.65990320  | -12.77285688 |
| C | -0.38149382 | -4.63044586 | 4.44298477   |
| C | -3.09598405 | -3.80041660 | 4.53350421   |
| C | -0.80357964 | -3.68777756 | 5.41746931   |
| C | -1.31665312 | -5.15809954 | 3.51375995   |
| C | -2.16082475 | -3.27276293 | 5.46272903   |
| C | -2.67389823 | -4.74308491 | 3.55901967   |
| C | 0.97575129  | -5.04546050 | 4.39772505   |
| C | 0.13157966  | -3.16012389 | 6.34669413   |

|   |             |             |            |
|---|-------------|-------------|------------|
| C | -0.89456731 | -6.10076784 | 2.53927541 |
| C | -4.45322916 | -3.38540197 | 4.57876393 |
| C | -2.58291056 | -2.33009463 | 6.43721357 |
| C | -3.60905753 | -5.27073858 | 2.62979485 |
| C | 1.48882477  | -3.57513852 | 6.30143441 |
| C | 0.46267780  | -6.51578247 | 2.49401570 |
| C | -3.94015567 | -1.91508000 | 6.48247328 |
| C | -4.96630264 | -4.85572395 | 2.67505457 |
| C | 1.91091064  | -4.51780684 | 5.32694987 |
| C | 1.39783716  | -5.98812882 | 3.42324051 |
| C | -4.87531503 | -2.44273365 | 5.55324847 |
| C | -5.38838851 | -3.91305563 | 3.64953911 |
| C | -0.29050620 | -2.21745573 | 7.32117848 |
| C | -1.82972656 | -6.62842137 | 1.61005078 |
| C | -1.64775131 | -1.80244110 | 7.36643820 |
| C | -3.18697167 | -6.21340674 | 1.65531050 |
| H | 2.95273959  | -4.83637440 | 5.29220826 |
| H | 2.43966610  | -6.30669637 | 3.38849890 |
| H | -5.91714397 | -2.12416610 | 5.58799008 |
| H | -6.43021746 | -3.59448807 | 3.68428072 |
| H | 0.42732740  | -1.81242575 | 8.03445676 |
| H | -1.97174677 | -1.07884353 | 8.11445810 |
| H | -1.50573110 | -7.35201894 | 0.86203088 |
| H | -3.90480527 | -6.61843672 | 0.94203222 |
| H | 2.20665838  | -3.17010870 | 7.01471250 |
| H | -4.26415124 | -1.19148255 | 7.23049300 |
| H | 0.78667337  | -7.23937991 | 1.74599598 |

|   |             |             |            |
|---|-------------|-------------|------------|
| H | -5.68413625 | -5.26075376 | 1.96177648 |
| C | 0.06382055  | 5.45146245  | 4.78718481 |
| C | -2.62771330 | 5.35434568  | 3.88617796 |
| C | -0.28616094 | 4.62965561  | 3.68330686 |
| C | -0.93196487 | 6.22471091  | 5.44055934 |
| C | -1.63192787 | 4.58109723  | 3.23280343 |
| C | -2.27773180 | 6.17615252  | 4.99005592 |
| C | 1.40958748  | 5.50002084  | 5.23768824 |
| C | 0.70962449  | 3.85640715  | 3.02993233 |
| C | -0.58198338 | 7.04651775  | 6.54443730 |
| C | -3.97348023 | 5.30578730  | 3.43567454 |
| C | -1.98190937 | 3.75929038  | 2.12892548 |
| C | -3.27351723 | 6.94940098  | 5.64343045 |
| C | 2.05539141  | 3.90496554  | 3.48043575 |
| C | 0.76378355  | 7.09507613  | 6.99494073 |
| C | -3.32767630 | 3.71073200  | 1.67842205 |
| C | -4.61928416 | 6.90084260  | 5.19292703 |
| C | 2.40537297  | 4.72677238  | 4.58431373 |
| C | 1.75956904  | 6.32182768  | 6.34156621 |
| C | -4.32346179 | 4.48398045  | 2.33179656 |
| C | -4.96926572 | 6.07903575  | 4.08904905 |
| C | 0.35964292  | 3.03460047  | 1.92605454 |
| C | -1.57776874 | 7.81976605  | 7.19781166 |
| C | -0.98612400 | 2.98604208  | 1.47555111 |
| C | -2.92353567 | 7.77120767  | 6.74730824 |
| H | 3.43839120  | 4.76404607  | 4.93012268 |
| H | 2.79258726  | 6.35910137  | 6.68737516 |

|   |             |            |            |
|---|-------------|------------|------------|
| H | -5.35648001 | 4.44670677 | 1.98598761 |
| H | -6.00228394 | 6.04176207 | 3.74324010 |
| H | 1.12401349  | 2.44105053 | 1.42452051 |
| H | -1.25477178 | 2.35521846 | 0.62820810 |
| H | -1.30912097 | 8.45058968 | 8.04515468 |
| H | -3.68790623 | 8.36475760 | 7.24884227 |
| H | 2.81976197  | 3.31141576 | 2.97890191 |
| H | -3.59632419 | 3.07990853 | 0.83107918 |
| H | 1.03243145  | 7.72589961 | 7.84228359 |
| H | -5.38365472 | 7.49439237 | 5.69446086 |
| K | 0.20465800  | 0.10074000 | 0.48149700 |

505

n = 14, Energy = -1365.47415423

|   |             |             |             |
|---|-------------|-------------|-------------|
| C | 0.45111609  | -2.13804513 | -2.17742861 |
| C | -2.14079349 | -2.86788322 | -3.08016921 |
| C | -0.43793000 | -2.82127448 | -1.30611076 |
| C | 0.04420739  | -1.81973482 | -3.50011675 |
| C | -1.73388479 | -3.18619353 | -1.75748107 |
| C | -1.25174740 | -2.18465387 | -3.95148706 |
| C | 1.74707088  | -1.77312609 | -1.72605830 |
| C | -0.03102130 | -3.13958479 | 0.01657738  |
| C | 0.93325347  | -1.13650547 | -4.37143459 |
| C | -3.43674828 | -3.23280227 | -3.53153952 |
| C | -2.62293088 | -3.86942288 | -0.88616323 |
| C | -1.65865611 | -1.86634356 | -5.27417520 |
| C | 1.26493349  | -2.77466575 | 0.46794769  |
| C | 2.22920826  | -0.77158643 | -3.92006429 |

|   |             |             |             |
|---|-------------|-------------|-------------|
| C | -3.91888567 | -4.23434193 | -1.33753353 |
| C | -2.95461090 | -2.23126261 | -5.72554551 |
| C | 2.15397963  | -2.09143638 | -0.40337014 |
| C | 2.63611702  | -1.08989672 | -2.59737612 |
| C | -4.32579442 | -3.91603163 | -2.66022169 |
| C | -3.84365704 | -2.91449197 | -4.85422768 |
| C | -0.92006734 | -3.82281405 | 0.88789501  |
| C | 0.52634473  | -0.81819526 | -5.69412253 |
| C | -2.21602213 | -4.18773309 | 0.43652471  |
| C | -0.76961006 | -1.18311431 | -6.14549283 |
| H | 3.14876178  | -1.81132248 | -0.05689576 |
| H | 3.63089917  | -0.80978282 | -2.25090175 |
| H | -5.32057657 | -4.19614554 | -3.00669607 |
| H | -4.83843919 | -3.19460588 | -5.20070206 |
| H | -0.60772192 | -4.06715086 | 1.90319798  |
| H | -2.89845896 | -4.71218384 | 1.10535327  |
| H | 1.20878156  | -0.29374451 | -6.36295109 |
| H | -1.08195549 | -0.93877749 | -7.16079580 |
| H | 1.57727902  | -3.01900245 | 1.48325046  |
| H | -4.60132251 | -4.75879259 | -0.66870520 |
| H | 2.91164511  | -0.24713576 | -4.58889262 |
| H | -3.26695642 | -1.98692590 | -6.74084828 |
| C | 9.23486320  | 8.72436396  | 5.16864551  |
| C | 10.31304178 | 6.98341107  | 7.13643959  |
| C | 8.55391273  | 8.53682668  | 6.40052874  |
| C | 10.45490297 | 8.04142480  | 4.92065932  |
| C | 9.09300201  | 7.66635023  | 7.38442578  |

|   |             |             |             |
|---|-------------|-------------|-------------|
| C | 10.99399225 | 7.17094835  | 5.90455636  |
| C | 8.69577392  | 9.59484041  | 4.18474848  |
| C | 7.33387296  | 9.21976584  | 6.64851494  |
| C | 11.13585345 | 8.22896208  | 3.68877609  |
| C | 10.85213106 | 6.11293462  | 8.12033662  |
| C | 8.41205153  | 7.47881295  | 8.61630901  |
| C | 12.21403202 | 6.48800919  | 5.65657017  |
| C | 6.79478368  | 10.09024228 | 5.66461790  |
| C | 10.59676416 | 9.09943853  | 2.70487906  |
| C | 8.95114082  | 6.60833650  | 9.60020604  |
| C | 12.75312130 | 5.61753275  | 6.64046720  |
| C | 7.47573413  | 10.27777960 | 4.43273463  |
| C | 9.37672438  | 9.78237773  | 2.95286521  |
| C | 10.17118060 | 5.92539730  | 9.35221989  |
| C | 12.07217085 | 5.42999543  | 7.87235047  |
| C | 6.65292267  | 9.03222851  | 7.88039802  |
| C | 12.35589303 | 7.54602297  | 3.44079004  |
| C | 7.19201195  | 8.16175206  | 8.86429506  |
| C | 12.89498231 | 6.67554652  | 4.42468708  |
| H | 7.06192618  | 10.94596220 | 3.67748976  |
| H | 8.96291642  | 10.45056032 | 2.19762034  |
| H | 10.58498856 | 5.25721471  | 10.10746477 |
| H | 12.48597880 | 4.76181283  | 8.62759534  |
| H | 5.71641318  | 9.55645650  | 8.07075365  |
| H | 6.66931047  | 8.01779739  | 9.80989564  |
| H | 12.87859451 | 7.68997764  | 2.49518946  |
| H | 13.83149180 | 6.15131853  | 4.23433145  |

|   |             |             |             |
|---|-------------|-------------|-------------|
| H | 5.85827436  | 10.61447026 | 5.85497335  |
| H | 8.42843954  | 6.46438174  | 10.54580653 |
| H | 11.11946544 | 9.24339329  | 1.75927857  |
| H | 13.68963063 | 5.09330477  | 6.45011175  |
| C | 6.43850814  | 1.45196934  | -4.16051573 |
| C | 5.34862017  | 0.95311185  | -1.58585362 |
| C | 5.21936718  | 2.06890845  | -3.77388732 |
| C | 7.11270512  | 0.58560148  | -3.25981308 |
| C | 4.67442320  | 1.81947971  | -2.48655627 |
| C | 6.56776113  | 0.33617274  | -1.97248203 |
| C | 6.98345213  | 1.70139808  | -5.44784678 |
| C | 4.54517021  | 2.93527631  | -4.67458996 |
| C | 8.33184608  | -0.03133764 | -3.64644149 |
| C | 4.80367619  | 0.70368311  | -0.29852257 |
| C | 3.45528224  | 2.43641883  | -2.09992786 |
| C | 7.24195811  | -0.53019512 | -1.07177939 |
| C | 5.09011419  | 3.18470506  | -5.96192101 |
| C | 8.87679006  | 0.21809111  | -4.93377254 |
| C | 2.91033825  | 2.18699008  | -0.81259681 |
| C | 6.69701412  | -0.77962387 | 0.21555166  |
| C | 6.30925518  | 2.56776595  | -6.34854947 |
| C | 8.20259311  | 1.08445898  | -5.83447524 |
| C | 3.58453521  | 1.32062221  | 0.08810589  |
| C | 5.47787314  | -0.16268476 | 0.60218012  |
| C | 3.32602943  | 3.55221528  | -4.28796150 |
| C | 9.00604287  | -0.89770535 | -2.74573890 |
| C | 2.78108545  | 3.30278654  | -3.00063045 |



|   |            |             |             |
|---|------------|-------------|-------------|
| C | 8.46109888 | -1.14713410 | -1.45840785 |
| H | 6.72755723 | 2.75922885  | -7.33671199 |
| H | 8.62089516 | 1.27592188  | -6.82263776 |
| H | 3.16623315 | 1.12915931  | 1.07626841  |
| H | 5.05957109 | -0.35414766 | 1.59034264  |
| H | 2.80851198 | 4.21724420  | -4.97934597 |
| H | 1.84526589 | 3.77635253  | -2.70385230 |
| H | 9.94186242 | -1.37127134 | -3.04251705 |
| H | 8.97861634 | -1.81216301 | -0.76702338 |
| H | 4.57259694 | 3.84973384  | -6.65330549 |
| H | 1.97451886 | 2.66055592  | -0.51581855 |
| H | 9.81260945 | -0.25547473 | -5.23055080 |
| H | 7.21453137 | -1.44465265 | 0.90693614  |
| C | 7.37845642 | -1.58491765 | 5.25879371  |
| C | 6.83458424 | -4.37235318 | 5.25640331  |
| C | 7.97738236 | -2.42432913 | 4.28253752  |
| C | 6.50759439 | -2.13922393 | 6.23385470  |
| C | 7.70544627 | -3.81804690 | 4.28134232  |
| C | 6.23565829 | -3.53294170 | 6.23265950  |
| C | 7.65039251 | -0.19119988 | 5.25998891  |
| C | 8.84824440 | -1.87002285 | 3.30747652  |
| C | 5.90866845 | -1.29981245 | 7.21011089  |
| C | 6.56264814 | -5.76607095 | 5.25520811  |
| C | 8.30437221 | -4.65745838 | 3.30508612  |
| C | 5.36479626 | -4.08724798 | 7.20772050  |
| C | 9.12018049 | -0.47630508 | 3.30867172  |
| C | 6.18060454 | 0.09390532  | 7.21130609  |

|   |             |             |             |
|---|-------------|-------------|-------------|
| C | 8.03243612  | -6.05117615 | 3.30389092  |
| C | 5.09286017  | -5.48096574 | 7.20652530  |
| C | 8.52125456  | 0.36310646  | 4.28492791  |
| C | 7.05146658  | 0.64821166  | 6.23624510  |
| C | 7.16157407  | -6.60548249 | 4.27895192  |
| C | 5.69178610  | -6.32037729 | 6.23026910  |
| C | 9.44717019  | -2.70943431 | 2.33122052  |
| C | 5.03780655  | -1.85411876 | 8.18517170  |
| C | 9.17523410  | -4.10315207 | 2.33002532  |
| C | 4.76587046  | -3.24783652 | 8.18397650  |
| H | 8.72999422  | 1.43293201  | 4.28584536  |
| H | 7.26020625  | 1.71803722  | 6.23716254  |
| H | 6.95283441  | -7.67530805 | 4.27803448  |
| H | 5.48304643  | -7.39020284 | 6.22935166  |
| H | 10.11564886 | -2.28394566 | 1.58275813  |
| H | 9.63497308  | -4.74748910 | 1.58064549  |
| H | 4.57806758  | -1.20978173 | 8.93455153  |
| H | 4.09739180  | -3.67332517 | 8.93243889  |
| H | 9.78865902  | -0.05081635 | 2.56020952  |
| H | 8.49217494  | -6.69551321 | 2.55451128  |
| H | 5.72086571  | 0.73824238  | 7.96068573  |
| H | 4.42438163  | -5.90645448 | 7.95498750  |
| C | 1.26870449  | -5.95771164 | -1.69236792 |
| C | 3.84225031  | -4.75686511 | -1.67165490 |
| C | 1.77728437  | -5.34819704 | -2.86975424 |
| C | 2.04689753  | -5.96680297 | -0.50462509 |
| C | 3.06405728  | -4.74777378 | -2.85939773 |

|   |             |             |             |
|---|-------------|-------------|-------------|
| C | 3.33367044  | -5.36637970 | -0.49426858 |
| C | -0.01806842 | -6.55813490 | -1.70272443 |
| C | 0.99909133  | -5.33910571 | -4.05749707 |
| C | 1.53831765  | -6.57631756 | 0.67276123  |
| C | 5.12902322  | -4.15644184 | -1.66129839 |
| C | 3.57263715  | -4.13825918 | -4.03678405 |
| C | 4.11186347  | -5.37547103 | 0.69347424  |
| C | -0.28768158 | -5.93952898 | -4.06785357 |
| C | 0.25154474  | -7.17674083 | 0.66240472  |
| C | 4.85941006  | -3.53783592 | -4.02642754 |
| C | 5.39863638  | -4.77504777 | 0.70383075  |
| C | -0.79626151 | -6.54904360 | -2.89046726 |
| C | -0.52664835 | -7.16764952 | -0.52533811 |
| C | 5.63760315  | -3.54692722 | -2.83868471 |
| C | 5.90721631  | -4.16553315 | -0.47355557 |
| C | 1.50767123  | -4.72959118 | -5.23488316 |
| C | 2.31651066  | -6.58540883 | 1.86050383  |
| C | 2.79444414  | -4.12916791 | -5.22452665 |
| C | 3.60328357  | -5.98498557 | 1.87086033  |
| H | -1.78399560 | -7.00993185 | -2.89841697 |
| H | -1.51438244 | -7.62853778 | -0.53328782 |
| H | 6.62533724  | -3.08603896 | -2.83073500 |
| H | 6.89495040  | -3.70464489 | -0.46560585 |
| H | 0.91032583  | -4.72261261 | -6.14660133 |
| H | 3.18483294  | -3.66130104 | -6.12829511 |
| H | 1.92612186  | -7.05327571 | 2.76427229  |
| H | 4.20062897  | -5.99196414 | 2.78257851  |

|   |             |             |             |
|---|-------------|-------------|-------------|
| H | -0.88502701 | -5.93255049 | -4.97957152 |
| H | 5.24979894  | -3.06996908 | -4.93019577 |
| H | -0.13884414 | -7.64460767 | 1.56617295  |
| H | 5.99598181  | -4.78202625 | 1.61554870  |
| C | -0.06432996 | 4.29100641  | 9.51949051  |
| C | 2.51375126  | 3.17454444  | 9.93495333  |
| C | 1.09411470  | 5.09110776  | 9.33443949  |
| C | 0.06626599  | 2.93267408  | 9.91227294  |
| C | 2.38315531  | 4.53287677  | 9.54217090  |
| C | 1.35530660  | 2.37444309  | 10.12000435 |
| C | -1.35337057 | 4.84923740  | 9.31175909  |
| C | 0.96351875  | 6.44944010  | 8.94165705  |
| C | -1.09217867 | 2.13257273  | 10.09732396 |
| C | 3.80279187  | 2.61631345  | 10.14268475 |
| C | 3.54159997  | 5.33297812  | 9.35711988  |
| C | 1.48590255  | 1.01611075  | 10.51278679 |
| C | -0.32552186 | 7.00767109  | 8.73392564  |
| C | -2.38121928 | 2.69080372  | 9.88959255  |
| C | 4.83064058  | 4.77474713  | 9.56485129  |
| C | 2.77494317  | 0.45787976  | 10.72051820 |
| C | -1.48396658 | 6.20756976  | 8.91897665  |
| C | -2.51181529 | 4.04913608  | 9.49681011  |
| C | 4.96123659  | 3.41641477  | 9.95763373  |
| C | 3.93338788  | 1.25798109  | 10.53546719 |
| C | 2.12196331  | 7.24954123  | 8.75660609  |
| C | -0.96158262 | 0.77424061  | 10.49010634 |
| C | 3.41100392  | 6.69131024  | 8.96433750  |

|   |             |             |             |
|---|-------------|-------------|-------------|
| C | 0.32745799  | 0.21600962  | 10.69783775 |
| H | -2.47344137 | 6.63607099  | 8.75952085  |
| H | -3.50129008 | 4.47763731  | 9.33735431  |
| H | 5.95071138  | 2.98791354  | 10.11708953 |
| H | 4.92286267  | 0.82947986  | 10.69492299 |
| H | 2.02171713  | 8.29220488  | 8.45510405  |
| H | 4.30023264  | 7.30547261  | 8.82229128  |
| H | -1.85081134 | 0.16007824  | 10.63215256 |
| H | 0.42770417  | -0.82665403 | 10.99933979 |
| H | -0.42576820 | 8.05033455  | 8.43242365  |
| H | 5.71986926  | 5.38890927  | 9.42280513  |
| H | -3.27044796 | 2.07664158  | 10.03163871 |
| H | 2.87518950  | -0.58478370 | 11.02202019 |
| C | 6.02343805  | 5.20337234  | -1.86772996 |
| C | 4.80352160  | 4.75848116  | 0.65803235  |
| C | 4.80736994  | 5.85980530  | -1.54111980 |
| C | 6.62954793  | 4.32449378  | -0.93145897 |
| C | 4.19741172  | 5.63735971  | -0.27823864 |
| C | 6.01958971  | 4.10204819  | 0.33142218  |
| C | 6.63339627  | 5.42581793  | -3.13061111 |
| C | 4.20126005  | 6.73868386  | -2.47739079 |
| C | 7.84561604  | 3.66806081  | -1.25806913 |
| C | 4.19356338  | 4.53603557  | 1.92091350  |
| C | 2.98134361  | 6.29379268  | 0.04837152  |
| C | 6.62569960  | 3.22316963  | 1.26769317  |
| C | 4.81121827  | 6.96112945  | -3.74027194 |
| C | 8.45557426  | 3.89050640  | -2.52095029 |

|   |             |            |             |
|---|-------------|------------|-------------|
| C | 2.37138539  | 6.07134709 | 1.31125267  |
| C | 6.01574137  | 3.00072404 | 2.53057433  |
| C | 6.02728641  | 6.30469649 | -4.06688216 |
| C | 7.84946440  | 4.76938497 | -3.45722133 |
| C | 2.97749525  | 5.19246852 | 2.24752372  |
| C | 4.79967324  | 3.65715700 | 2.85718454  |
| C | 2.98519212  | 7.39511668 | -2.15078057 |
| C | 8.45172575  | 2.78918241 | -0.32179820 |
| C | 2.37523390  | 7.17267109 | -0.88789941 |
| C | 7.84176752  | 2.56673682 | 0.94108295  |
| H | 6.49549375  | 6.47544697 | -5.03627680 |
| H | 8.31767174  | 4.94013545 | -4.42661597 |
| H | 2.50928791  | 5.02171804 | 3.21691836  |
| H | 4.33146590  | 3.48640652 | 3.82657918  |
| H | 2.51993871  | 8.06974887 | -2.86946750 |
| H | 1.44177309  | 7.67655279 | -0.63719160 |
| H | 9.38518656  | 2.28530071 | -0.57250601 |
| H | 8.30702094  | 1.89210462 | 1.65976989  |
| H | 4.34596506  | 7.63576151 | -4.45895887 |
| H | 1.43792473  | 6.57522863 | 1.56196059  |
| H | 9.38903492  | 3.38662486 | -2.77165821 |
| H | 6.48099459  | 2.32609199 | 3.24926126  |
| C | -1.46207074 | 3.41672640 | 5.97593550  |
| C | -0.55019592 | 0.85586630 | 6.79817596  |
| C | -2.39728059 | 2.38219341 | 6.24337544  |
| C | -0.07092349 | 3.17082934 | 6.11961579  |
| C | -1.94134318 | 1.10176336 | 6.65449567  |

|   |             |             |            |
|---|-------------|-------------|------------|
| C | 0.38501392  | 1.89039929  | 6.53073602 |
| C | -1.91800815 | 4.69715645  | 5.56481527 |
| C | -3.78842784 | 2.62809048  | 6.09969515 |
| C | 0.86428636  | 4.20536233  | 5.85217585 |
| C | -0.09425851 | -0.42456375 | 7.20929618 |
| C | -2.87655302 | 0.06723038  | 6.92193561 |
| C | 1.77616118  | 1.64450223  | 6.67441630 |
| C | -4.24436525 | 3.90852053  | 5.68857493 |
| C | 0.40834894  | 5.48579238  | 5.44105562 |
| C | -2.42061561 | -1.21319967 | 7.33305584 |
| C | 2.23209859  | 0.36407218  | 7.08553653 |
| C | -3.30915543 | 4.94305357  | 5.42113497 |
| C | -0.98279833 | 5.73168949  | 5.29737532 |
| C | -1.02946833 | -1.45909679 | 7.47673614 |
| C | 1.29688877  | -0.67046087 | 7.35297649 |
| C | -4.72363746 | 1.59355756  | 6.36713508 |
| C | 2.25543339  | 3.95946519  | 5.99585615 |
| C | -4.26770005 | 0.31312751  | 6.77825531 |
| C | 2.71137080  | 2.67903514  | 6.40697638 |
| H | -3.65913554 | 5.92591884  | 5.10555678 |
| H | -1.33277844 | 6.71455477  | 4.98179713 |
| H | -0.67948823 | -2.44196206 | 7.79231433 |
| H | 1.64686887  | -1.65332614 | 7.66855468 |
| H | -5.79149003 | 1.78230953  | 6.25684528 |
| H | -4.98557247 | -0.48098590 | 6.98354373 |
| H | 2.97330581  | 4.75357860  | 5.79056773 |
| H | 3.77922337  | 2.49028317  | 6.51726618 |

|   |             |             |             |
|---|-------------|-------------|-------------|
| H | -5.31221762 | 4.09727263  | 5.57828509  |
| H | -3.13848779 | -2.00731306 | 7.53834426  |
| H | 1.12622112  | 6.27990576  | 5.23576720  |
| H | 3.29995096  | 0.17532008  | 7.19582636  |
| C | -4.30191779 | 1.79539615  | 0.21573972  |
| C | -3.95637452 | 4.44058515  | 1.18999560  |
| C | -3.11276132 | 2.51204829  | -0.08211374 |
| C | -5.31830262 | 2.40133852  | 1.00072111  |
| C | -2.93998968 | 3.83464279  | 0.40501420  |
| C | -5.14553099 | 3.72393302  | 1.48784905  |
| C | -4.47468942 | 0.47280165  | -0.27138822 |
| C | -2.09637648 | 1.90610592  | -0.86709513 |
| C | -6.50745910 | 1.68468638  | 1.29857457  |
| C | -3.78360288 | 5.76317965  | 1.67712354  |
| C | -1.75083321 | 4.55129492  | 0.10716075  |
| C | -6.16191583 | 4.32987538  | 2.27283045  |
| C | -2.26914811 | 0.58351142  | -1.35422307 |
| C | -6.68023073 | 0.36209188  | 0.81144663  |
| C | -1.57806157 | 5.87388942  | 0.59428869  |
| C | -5.98914419 | 5.65246988  | 2.75995839  |
| C | -3.45830459 | -0.13314077 | -1.05636964 |
| C | -5.66384590 | -0.24385054 | 0.02646521  |
| C | -2.59444640 | 6.47983184  | 1.37927011  |
| C | -4.79998771 | 6.36912207  | 2.46210496  |
| C | -0.90722022 | 2.62275805  | -1.16494848 |
| C | -7.52384372 | 2.29062876  | 2.08355586  |
| C | -0.73444859 | 3.94535255  | -0.67782054 |



|   |             |             |             |
|---|-------------|-------------|-------------|
| C | -7.35107208 | 3.61322326  | 2.57068380  |
| H | -3.59092507 | -1.14837171 | -1.43029177 |
| H | -5.79646638 | -1.25908148 | -0.34745692 |
| H | -2.46182593 | 7.49506278  | 1.75319224  |
| H | -4.66736724 | 7.38435301  | 2.83602709  |
| H | -0.12703741 | 2.15763325  | -1.76750467 |
| H | 0.17835471  | 4.49545880  | -0.90645456 |
| H | -8.43664702 | 1.74052251  | 2.31218988  |
| H | -8.13125489 | 4.07834806  | 3.17323999  |
| H | -1.48896553 | 0.11838656  | -1.95677918 |
| H | -0.66525848 | 6.42399572  | 0.36565480  |
| H | -7.59303382 | -0.18801441 | 1.04008052  |
| H | -6.76932678 | 6.11759475  | 3.36251450  |
| C | -4.58728487 | 3.67468381  | -3.06528895 |
| C | -2.90728392 | 5.95720399  | -2.88281167 |
| C | -5.03551750 | 4.83297336  | -2.37691921 |
| C | -3.29905177 | 3.65765434  | -3.66242005 |
| C | -4.19551703 | 5.97423345  | -2.28568057 |
| C | -2.45905130 | 4.79891444  | -3.57118141 |
| C | -5.42728534 | 2.53342372  | -3.15652759 |
| C | -6.32375060 | 4.85000282  | -1.77978811 |
| C | -2.85081914 | 2.49936479  | -4.35078980 |
| C | -2.06728345 | 7.09846408  | -2.79157303 |
| C | -4.64374965 | 7.13252300  | -1.59731083 |
| C | -1.17081820 | 4.78188497  | -4.16831252 |
| C | -7.16375107 | 3.70874273  | -1.87102675 |
| C | -3.69081962 | 1.35810470  | -4.44202844 |

|   |             |            |             |
|---|-------------|------------|-------------|
| C | -3.80374918 | 8.27378309 | -1.50607219 |
| C | -0.33081772 | 5.92314506 | -4.07707388 |
| C | -6.71551848 | 2.55045313 | -2.55939649 |
| C | -4.97905275 | 1.37513412 | -3.84489734 |
| C | -2.51551604 | 8.25675368 | -2.10320329 |
| C | -0.77905032 | 7.08143466 | -3.38870413 |
| C | -6.77198306 | 6.00829226 | -1.09141849 |
| C | -1.56258621 | 2.48233544 | -4.94792077 |
| C | -5.93198258 | 7.14955235 | -1.00017985 |
| C | -0.72258574 | 3.62359553 | -4.85668213 |
| H | -7.36030754 | 1.67441550 | -2.62943178 |
| H | -5.62384182 | 0.49909648 | -3.91493263 |
| H | -1.87072698 | 9.13279131 | -2.03316800 |
| H | -0.13426125 | 7.95747230 | -3.31866884 |
| H | -7.76083813 | 6.02136419 | -0.63305725 |
| H | -6.27604852 | 8.03866201 | -0.47178331 |
| H | -1.21852027 | 1.59322579 | -5.47631732 |
| H | 0.26626933  | 3.61052360 | -5.31504338 |
| H | -8.15260601 | 3.72181450 | -1.41266563 |
| H | -4.14781491 | 9.16289268 | -0.97767577 |
| H | -3.34675388 | 0.46899511 | -4.97042486 |
| H | 0.65803722  | 5.91007330 | -4.53543499 |
| C | 7.91414062  | 6.91780090 | 1.44313570  |
| C | 7.11425337  | 6.05433084 | 4.02774386  |
| C | 8.70934660  | 5.98267094 | 2.15698405  |
| C | 6.71899101  | 7.42119583 | 2.02159142  |
| C | 8.30940298  | 5.55093591 | 3.44928813  |

|   |             |            |             |
|---|-------------|------------|-------------|
| C | 6.31904738  | 6.98946080 | 3.31389550  |
| C | 8.31408424  | 7.34953593 | 0.15083162  |
| C | 9.90449621  | 5.47927601 | 1.57852832  |
| C | 5.92378502  | 8.35632579 | 1.30774307  |
| C | 6.71430974  | 5.62259580 | 5.32004794  |
| C | 9.10460896  | 4.61580594 | 4.16313648  |
| C | 5.12389777  | 7.49285573 | 3.89235123  |
| C | 10.30443984 | 5.91101104 | 0.28622424  |
| C | 6.32372865  | 8.78806083 | 0.01543899  |
| C | 8.70466533  | 4.18407091 | 5.45544056  |
| C | 4.72395414  | 7.06112070 | 5.18465531  |
| C | 9.50923387  | 6.84614102 | -0.42762417 |
| C | 7.51887827  | 8.28466592 | -0.56301679 |
| C | 7.50951571  | 4.68746582 | 6.03389634  |
| C | 5.51916011  | 6.12599072 | 5.89850372  |
| C | 10.69970200 | 4.54414618 | 2.29237666  |
| C | 4.72863560  | 8.85972059 | 1.88619881  |
| C | 10.29975838 | 4.11241115 | 3.58468074  |
| C | 4.32869198  | 8.42798555 | 3.17850289  |
| H | 9.81623283  | 7.17754325 | -1.41960401 |
| H | 7.82587724  | 8.61606814 | -1.55499664 |
| H | 7.20251674  | 4.35606359 | 7.02587619  |
| H | 5.21216115  | 5.79458849 | 6.89048356  |
| H | 11.61710566 | 4.15773735 | 1.84835076  |
| H | 10.91016304 | 3.39460006 | 4.13263479  |
| H | 4.11823094  | 9.57753168 | 1.33824476  |
| H | 3.41128832  | 8.81439438 | 3.62252879  |

|   |             |             |             |
|---|-------------|-------------|-------------|
| H | 11.22184332 | 5.52460237  | -0.15780173 |
| H | 9.31506979  | 3.46625994  | 6.00339465  |
| H | 5.71332419  | 9.50587180  | -0.53251510 |
| H | 3.80655066  | 7.44752937  | 5.62868128  |
| C | 8.49299647  | -1.69898238 | 9.65420113  |
| C | 10.26487882 | -1.35811882 | 7.46106537  |
| C | 8.89104479  | -2.82209720 | 8.88182122  |
| C | 8.98088932  | -0.40543579 | 9.33001316  |
| C | 9.77698596  | -2.65166541 | 7.78525334  |
| C | 9.86683050  | -0.23500400 | 8.23344528  |
| C | 7.60705529  | -1.86941417 | 10.75076901 |
| C | 8.40315193  | -4.11564379 | 9.20600919  |
| C | 8.58284100  | 0.71767903  | 10.10239307 |
| C | 11.15081999 | -1.18768703 | 6.36449748  |
| C | 10.17503428 | -3.77478023 | 7.01287342  |
| C | 10.35472335 | 1.05854259  | 7.90925731  |
| C | 7.51721075  | -4.28607558 | 10.30257707 |
| C | 7.69689983  | 0.54724724  | 11.19896095 |
| C | 11.06097546 | -3.60434844 | 5.91630554  |
| C | 11.24066453 | 1.22897438  | 6.81268943  |
| C | 7.11916240  | -3.16296077 | 11.07495703 |
| C | 7.20900694  | -0.74629936 | 11.52314897 |
| C | 11.54886835 | -2.31080184 | 5.59211753  |
| C | 11.63871289 | 0.10585957  | 6.04030947  |
| C | 8.80120026  | -5.23875837 | 8.43362932  |
| C | 9.07073385  | 2.01122539  | 9.77820506  |
| C | 9.68714143  | -5.06832659 | 7.33706144  |

|   |             |             |             |
|---|-------------|-------------|-------------|
| C | 9.95667503  | 2.18165717  | 8.68163718  |
| H | 6.43910899  | -3.29378516 | 11.91668867 |
| H | 6.52895353  | -0.87712375 | 12.36488061 |
| H | 12.22892175 | -2.17997745 | 4.75038588  |
| H | 12.31876629 | 0.23668396  | 5.19857782  |
| H | 8.42669093  | -6.23169213 | 8.68247784  |
| H | 9.99268558  | -5.93043594 | 6.74417822  |
| H | 8.76518970  | 2.87333474  | 10.37108827 |
| H | 10.33118436 | 3.17459092  | 8.43278866  |
| H | 7.14270140  | -5.27900910 | 10.55142568 |
| H | 11.36651965 | -4.46645755 | 5.32342232  |
| H | 7.39135563  | 1.40935635  | 11.79184417 |
| H | 11.61517389 | 2.22190790  | 6.56384082  |
| C | 3.80839778  | 6.32378070  | 12.85067791 |
| C | 3.42453845  | 3.60530720  | 13.57741950 |
| C | 2.49609941  | 5.78565216  | 12.91916680 |
| C | 4.92876649  | 5.50267249  | 13.14555981 |
| C | 2.30416974  | 4.42641541  | 13.28253760 |
| C | 4.73683683  | 4.14343574  | 13.50893061 |
| C | 4.00032745  | 7.68301745  | 12.48730711 |
| C | 1.37573070  | 6.60676037  | 12.62428490 |
| C | 6.24106486  | 6.04080103  | 13.07707092 |
| C | 3.23260879  | 2.24607045  | 13.94079030 |
| C | 0.99187137  | 3.88828687  | 13.35102649 |
| C | 5.85720554  | 3.32232753  | 13.80381251 |
| C | 1.56766036  | 7.96599713  | 12.26091410 |
| C | 6.43299453  | 7.40003778  | 12.71370012 |

|   |             |             |             |
|---|-------------|-------------|-------------|
| C | 0.79994170  | 2.52905012  | 13.71439729 |
| C | 5.66527587  | 1.96309078  | 14.16718331 |
| C | 2.87995874  | 8.50412572  | 12.19242519 |
| C | 5.31262583  | 8.22114605  | 12.41881821 |
| C | 1.92031041  | 1.70794185  | 14.00927921 |
| C | 4.35297749  | 1.42496218  | 14.23567222 |
| C | 0.06343256  | 6.06863181  | 12.69277381 |
| C | 7.36143334  | 5.21969285  | 13.37195280 |
| C | -0.12849710 | 4.70939505  | 13.05614461 |
| C | 7.16950367  | 3.86045610  | 13.73532360 |
| H | 3.02728503  | 9.54748346  | 11.91349974 |
| H | 5.45995211  | 9.26450379  | 12.13989275 |
| H | 1.77298412  | 0.66458411  | 14.28820466 |
| H | 4.20565120  | 0.38160444  | 14.51459767 |
| H | -0.79656886 | 6.69891914  | 12.46642078 |
| H | -1.13582483 | 4.29632453  | 13.10871707 |
| H | 8.36876106  | 5.63276337  | 13.31938034 |
| H | 8.02950510  | 3.23016877  | 13.96167663 |
| H | 0.70765918  | 8.59628449  | 12.03456108 |
| H | -0.20738579 | 2.11597951  | 13.76696978 |
| H | 7.44032203  | 7.81310839  | 12.66112763 |
| H | 6.52527705  | 1.33280342  | 14.39353633 |
| C | 0.73130952  | -0.58443994 | 3.67625766  |
| C | -1.19738507 | -2.62414173 | 4.10678443  |
| C | -0.65096932 | -0.29870626 | 3.52113988  |
| C | 1.14924108  | -1.89002452 | 4.04663882  |
| C | -1.61531662 | -1.31855715 | 3.73640326  |

|   |             |             |            |
|---|-------------|-------------|------------|
| C | 0.18489378  | -2.90987542 | 4.26190220 |
| C | 1.69565682  | 0.43541095  | 3.46099428 |
| C | -1.06890087 | 1.00687832  | 3.15075872 |
| C | 2.53151992  | -2.17575821 | 4.20175660 |
| C | -2.16173237 | -3.64399262 | 4.32204781 |
| C | -2.99759547 | -1.03282347 | 3.58128548 |
| C | 0.60282533  | -4.21545999 | 4.63228337 |
| C | -0.10455358 | 2.02672921  | 2.93549534 |
| C | 3.49586722  | -1.15590731 | 3.98649322 |
| C | -3.96194276 | -2.05267436 | 3.79654887 |
| C | -0.36152197 | -5.23531089 | 4.84754675 |
| C | 1.27772531  | 1.74099557  | 3.09061311 |
| C | 3.07793571  | 0.14967731  | 3.61611205 |
| C | -3.54401125 | -3.35825898 | 4.16693004 |
| C | -1.74380086 | -4.94957725 | 4.69242898 |
| C | -2.45117955 | 1.29261185  | 2.99564099 |
| C | 2.94945130  | -3.48134263 | 4.57213771 |
| C | -3.41552684 | 0.27276096  | 3.21090437 |
| C | 1.98510400  | -4.50119352 | 4.78740109 |
| H | 2.01796369  | 2.52383882  | 2.92537573 |
| H | 3.81817409  | 0.93252056  | 3.45087467 |
| H | -4.28424964 | -4.14110224 | 4.33216741 |
| H | -2.48403924 | -5.73242050 | 4.85766636 |
| H | -2.77198621 | 2.29478601  | 2.71133430 |
| H | -4.47657197 | 0.49209178  | 3.09183508 |
| H | 4.01049642  | -3.70067346 | 4.69120701 |
| H | 2.30591066  | -5.50336769 | 5.07170779 |

|   |             |             |            |
|---|-------------|-------------|------------|
| H | -0.42536002 | 3.02890326  | 2.65118869 |
| H | -5.02298775 | -1.83334373 | 3.67747963 |
| H | 4.55691221  | -1.37523794 | 4.10556246 |
| H | -0.04071552 | -6.23748494 | 5.13185340 |
| K | 0.20465800  | 0.10074000  | 0.48149700 |

541

n = 15, Energy = -1450.61069735

|   |            |             |             |
|---|------------|-------------|-------------|
| C | 5.48187930 | 1.10630169  | -2.89909116 |
| C | 6.41783377 | 2.00326805  | -0.37222747 |
| C | 5.34521062 | 2.47209016  | -2.53530057 |
| C | 6.08652522 | 0.18899640  | -1.99944990 |
| C | 5.81318785 | 2.92057335  | -1.27186873 |
| C | 6.55450245 | 0.63747958  | -0.73601806 |
| C | 5.01390206 | 0.65781851  | -4.16252300 |
| C | 4.74056470 | 3.38939546  | -3.43494183 |
| C | 6.22319390 | -1.17679208 | -2.36324049 |
| C | 6.88581101 | 2.45175123  | 0.89120437  |
| C | 5.67651917 | 4.28636182  | -0.90807814 |
| C | 7.15914837 | -0.27982572 | 0.16362320  |
| C | 4.27258747 | 2.94091228  | -4.69837367 |
| C | 5.75521666 | -1.62527526 | -3.62667233 |
| C | 6.14449641 | 4.73484500  | 0.35535370  |
| C | 7.62712560 | 0.16865746  | 1.42705504  |
| C | 4.40925613 | 1.57512378  | -5.06216431 |
| C | 5.15057073 | -0.70796998 | -4.52631364 |
| C | 6.74914234 | 3.81753973  | 1.25499501  |
| C | 7.49045694 | 1.53444596  | 1.79084568  |



|   |             |             |             |
|---|-------------|-------------|-------------|
| C | 4.60389609  | 4.75518371  | -3.07115119 |
| C | 6.82783974  | -2.09409715 | -1.46359928 |
| C | 5.07187333  | 5.20366689  | -1.80771935 |
| C | 7.29581698  | -1.64561397 | -0.20016744 |
| H | 4.05003418  | 1.23086558  | -6.03198166 |
| H | 4.79134878  | -1.05222818 | -5.49613099 |
| H | 7.10836429  | 4.16179793  | 2.22481237  |
| H | 7.84967889  | 1.87870416  | 2.76066304  |
| H | 4.13976644  | 5.45931250  | -3.76172094 |
| H | 4.96696566  | 6.25205392  | -1.52847163 |
| H | 6.93274741  | -3.14248418 | -1.74284699 |
| H | 7.75994663  | -2.34974276 | 0.49040231  |
| H | 3.80845787  | 3.64504083  | -5.38894342 |
| H | 6.03958883  | 5.78323183  | 0.63460152  |
| H | 5.86012424  | -2.67366208 | -3.90592015 |
| H | 8.09125520  | -0.53547108 | 2.11762479  |
| C | -2.53454149 | -5.79166059 | -0.98820345 |
| C | -4.37182745 | -3.70758102 | -1.57692427 |
| C | -3.48519407 | -5.38703476 | -0.01406912 |
| C | -2.50253189 | -5.15424663 | -2.25669820 |
| C | -4.40383705 | -4.34499498 | -0.30842953 |
| C | -3.42117487 | -4.11220685 | -2.55105861 |
| C | -1.61589851 | -6.83370037 | -0.69384305 |
| C | -3.51720367 | -6.02444872 | 1.25442562  |
| C | -1.55187931 | -5.55887245 | -3.23083253 |
| C | -5.29047043 | -2.66554124 | -1.87128468 |
| C | -5.35448962 | -3.94036916 | 0.66570480  |

|   |             |             |             |
|---|-------------|-------------|-------------|
| C | -3.38916527 | -3.47479289 | -3.81955335 |
| C | -2.59856069 | -7.06648850 | 1.54878603  |
| C | -0.63323633 | -6.60091223 | -2.93647212 |
| C | -6.27313260 | -2.89832938 | 0.37134439  |
| C | -4.30780825 | -2.43275311 | -4.11391376 |
| C | -1.64790807 | -7.47111437 | 0.57465171  |
| C | -0.66524589 | -7.23832623 | -1.66797736 |
| C | -6.24112304 | -2.26091538 | -0.89715037 |
| C | -5.25846086 | -2.02812724 | -3.13977944 |
| C | -4.46785615 | -5.61982288 | 2.22855973  |
| C | -1.51986981 | -4.92145851 | -4.49932705 |
| C | -5.38649913 | -4.57778310 | 1.93419932  |
| C | -2.43851279 | -3.87941873 | -4.79368746 |
| H | -0.94275258 | -8.27098994 | 0.80060441  |
| H | 0.03990960  | -8.03820180 | -1.44202467 |
| H | -6.94627854 | -1.46103981 | -1.12310306 |
| H | -5.96361636 | -1.22825167 | -3.36573214 |
| H | -4.49242692 | -6.10910546 | 3.20226353  |
| H | -6.11622546 | -4.26719002 | 2.68195040  |
| H | -0.79014347 | -5.23205159 | -5.24707813 |
| H | -2.41394202 | -3.39013615 | -5.76739126 |
| H | -2.62313132 | -7.55577110 | 2.52248963  |
| H | -7.00285888 | -2.58773624 | 1.11909524  |
| H | 0.09648995  | -6.91150537 | -3.68422297 |
| H | -4.28323762 | -1.94347051 | -5.08761736 |
| C | -6.92827679 | -5.75948404 | -3.04780257 |
| C | -6.29204927 | -4.93548295 | -5.69011902 |

|   |             |             |             |
|---|-------------|-------------|-------------|
| C | -5.86905922 | -6.39017917 | -3.75255918 |
| C | -7.66938059 | -4.71678837 | -3.66420418 |
| C | -5.55094546 | -5.97817863 | -5.07371741 |
| C | -7.35126684 | -4.30478782 | -4.98536241 |
| C | -7.24639054 | -6.17148459 | -1.72664434 |
| C | -5.12795541 | -7.43287484 | -3.13615756 |
| C | -8.72859816 | -4.08609324 | -2.95944757 |
| C | -5.97393552 | -4.52348241 | -7.01127725 |
| C | -4.49172790 | -6.60887375 | -5.77847402 |
| C | -8.09237065 | -3.26209215 | -5.60176403 |
| C | -5.44606917 | -7.84487539 | -1.81499933 |
| C | -9.04671192 | -4.49809379 | -1.63828934 |
| C | -4.17361414 | -6.19687321 | -7.09963225 |
| C | -7.77425689 | -2.85009161 | -6.92292226 |
| C | -6.50528675 | -7.21418028 | -1.11024266 |
| C | -8.30560812 | -5.54078948 | -1.02188767 |
| C | -4.91471794 | -5.15417752 | -7.71603392 |
| C | -6.71503931 | -3.48078672 | -7.62767893 |
| C | -4.06873802 | -8.06356981 | -3.84091416 |
| C | -9.46970179 | -3.04339773 | -3.57584920 |
| C | -3.75062426 | -7.65156926 | -5.16207239 |
| C | -9.15158804 | -2.63139719 | -4.89700743 |
| H | -6.74947265 | -7.53043420 | -0.09611421 |
| H | -8.54979402 | -5.85704340 | -0.00775922 |
| H | -4.67053204 | -4.83792359 | -8.73016237 |
| H | -6.47085341 | -3.16453279 | -8.64180738 |
| H | -3.49986250 | -8.86394896 | -3.36776078 |

|   |              |             |              |
|---|--------------|-------------|--------------|
| H | -2.93756282  | -8.13569445 | -5.70304757  |
| H | -10.28276324 | -2.55927254 | -3.03487402  |
| H | -9.72046356  | -1.83101804 | -5.37016081  |
| H | -4.87719383  | -8.64525439 | -1.34184589  |
| H | -3.36055286  | -6.68099822 | -7.64060747  |
| H | -9.85977320  | -4.01396878 | -1.09731412  |
| H | -8.34313222  | -2.04971260 | -7.39607570  |
| C | -2.19656564  | -1.07778468 | -11.75101568 |
| C | 0.28818130   | -2.44303079 | -11.91755469 |
| C | -2.15948414  | -2.49563403 | -11.68225347 |
| C | -0.99127367  | -0.34255837 | -11.90304739 |
| C | -0.91711067  | -3.17825709 | -11.76552298 |
| C | 0.25109979   | -1.02518143 | -11.98631690 |
| C | -3.43893911  | -0.39516162 | -11.66774617 |
| C | -3.36477610  | -3.23086033 | -11.53022176 |
| C | -1.02835517  | 1.07529098  | -11.97180959 |
| C | 1.53055476   | -3.12565384 | -12.00082420 |
| C | -0.88002917  | -4.59610644 | -11.69676078 |
| C | 1.45639176   | -0.28995513 | -12.13834861 |
| C | -4.60714957  | -2.54823728 | -11.44695225 |
| C | -2.27072864  | 1.75791404  | -11.88854008 |
| C | 0.36234430   | -5.27872950 | -11.78003029 |
| C | 2.69876523   | -0.97257818 | -12.22161811 |
| C | -4.64423112  | -1.13038789 | -11.51571445 |
| C | -3.47602066  | 1.02268776  | -11.73650837 |
| C | 1.56763632   | -4.54350323 | -11.93206200 |
| C | 2.73584678   | -2.39042757 | -12.15285591 |

|   |             |             |              |
|---|-------------|-------------|--------------|
| C | -3.32769449 | -4.64870948 | -11.46145958 |
| C | 0.17693668  | 1.81051707  | -12.12384128 |
| C | -2.08532102 | -5.33133254 | -11.54472909 |
| C | 1.41931014  | 1.12789402  | -12.20711079 |
| H | -5.59788395 | -0.60640262 | -11.45179631 |
| H | -4.42967349 | 1.54667304  | -11.67259023 |
| H | 2.52128914  | -5.06748850 | -11.99598014 |
| H | 3.68949961  | -2.91441285 | -12.21677405 |
| H | -4.25288346 | -5.21307340 | -11.34475917 |
| H | -2.05685707 | -6.41968179 | -11.49194683 |
| H | 0.14847272  | 2.89886633  | -12.17662354 |
| H | 2.34449912  | 1.69225794  | -12.32381120 |
| H | -5.53233848 | -3.11260096 | -11.33025186 |
| H | 0.39080842  | -6.36707857 | -11.72724805 |
| H | -2.29919276 | 2.84626311  | -11.94132232 |
| H | 3.62395414  | -0.40821450 | -12.33831850 |
| C | -1.75278976 | -0.69705943 | 4.03197451   |
| C | -3.39568912 | -2.73098503 | 5.14086036   |
| C | -1.16130522 | -1.80474447 | 4.69498278   |
| C | -3.16572398 | -0.60633718 | 3.92340918   |
| C | -1.98275490 | -2.82170727 | 5.24942570   |
| C | -3.98717367 | -1.62329999 | 4.47785210   |
| C | -0.93134008 | 0.31990337  | 3.47753159   |
| C | 0.25162900  | -1.89546671 | 4.80354811   |
| C | -3.75720853 | 0.50134786  | 3.26040091   |
| C | -4.21713881 | -3.74794783 | 5.69530329   |
| C | -1.39127036 | -3.92939232 | 5.91243397   |

|   |             |             |             |
|---|-------------|-------------|-------------|
| C | -5.40010789 | -1.53257774 | 4.36928676  |
| C | 1.07307869  | -0.87850391 | 4.24910519  |
| C | -2.93575884 | 1.51831066  | 2.70595799  |
| C | -2.21272004 | -4.94635512 | 6.46687689  |
| C | -6.22155757 | -2.54954055 | 4.92372969  |
| C | 0.48159418  | 0.22918117  | 3.58609690  |
| C | -1.52282459 | 1.42758846  | 2.81452330  |
| C | -3.62565430 | -4.85563292 | 6.35831158  |
| C | -5.63007306 | -3.65722563 | 5.58673798  |
| C | 0.84311335  | -3.00315164 | 5.46655630  |
| C | -5.17014255 | 0.59206999  | 3.15183565  |
| C | 0.02166367  | -4.02011444 | 6.02099923  |
| C | -5.99159224 | -0.42489282 | 3.70627858  |
| H | 1.11214355  | 1.00980751  | 3.16050341  |
| H | -0.89227521 | 2.20821480  | 2.38892981  |
| H | -4.25620367 | -5.63625926 | 6.78390507  |
| H | -6.26062244 | -4.43785197 | 6.01233147  |
| H | 1.92768972  | -3.07279057 | 5.54989168  |
| H | 0.47569059  | -4.87037979 | 6.52992815  |
| H | -5.62416948 | 1.44233534  | 2.64290673  |
| H | -7.07616860 | -0.35525389 | 3.62294319  |
| H | 2.15765489  | -0.94814268 | 4.33244047  |
| H | -1.75869335 | -5.79662040 | 6.97580576  |
| H | -3.38978554 | 2.36857594  | 2.19702912  |
| H | -7.30613378 | -2.47990178 | 4.84039441  |
| C | -0.06215009 | -0.20460068 | -8.38354977 |
| C | 2.50332707  | -1.40684574 | -8.57984867 |

|   |             |             |             |
|---|-------------|-------------|-------------|
| C | 1.09429136  | 0.60814308  | -8.51953081 |
| C | 0.06414705  | -1.61846697 | -8.34571819 |
| C | 2.37702994  | 0.00702055  | -8.61768026 |
| C | 1.34688563  | -2.21958950 | -8.44386764 |
| C | -1.34488867 | 0.39652185  | -8.28540033 |
| C | 0.96799423  | 2.02200937  | -8.55736240 |
| C | -1.09229440 | -2.43121072 | -8.20973715 |
| C | 3.78606565  | -2.00796827 | -8.67799812 |
| C | 3.53347139  | 0.81976430  | -8.75366129 |
| C | 1.47318276  | -3.63345579 | -8.40603605 |
| C | -0.31474435 | 2.62313190  | -8.45921295 |
| C | -2.37503298 | -1.83008819 | -8.11158770 |
| C | 4.81620997  | 0.21864177  | -8.85181074 |
| C | 2.75592134  | -4.23457832 | -8.50418550 |
| C | -1.47118585 | 1.81038817  | -8.32323191 |
| C | -2.50133017 | -0.41622188 | -8.14941929 |
| C | 4.94250715  | -1.19522454 | -8.81397916 |
| C | 3.91236284  | -3.42183459 | -8.64016654 |
| C | 2.12443557  | 2.83475291  | -8.69334341 |
| C | -0.96599717 | -3.84507680 | -8.17190558 |
| C | 3.40717415  | 2.23363037  | -8.79149286 |
| C | 0.31674141  | -4.44619933 | -8.27005503 |
| H | -2.45582317 | 2.27181319  | -8.24789184 |
| H | -3.48596748 | 0.04520314  | -8.07407922 |
| H | 5.92714447  | -1.65664956 | -8.88931923 |
| H | 4.89700015  | -3.88325961 | -8.71550661 |
| H | 2.02748919  | 3.92004474  | -8.72238316 |

|   |             |             |             |
|---|-------------|-------------|-------------|
| H | 4.29486519  | 2.85749713  | -8.89587268 |
| H | -1.85368821 | -4.46894356 | -8.06752577 |
| H | 0.41368779  | -5.53149116 | -8.24101529 |
| H | -0.41169089 | 3.70842354  | -8.48825267 |
| H | 5.70390096  | 0.84250829  | -8.95619055 |
| H | -3.26272398 | -2.45395471 | -8.00720790 |
| H | 2.85286787  | -5.31986996 | -8.47514578 |
| C | 4.30424592  | 0.64682330  | 3.52600203  |
| C | 3.21408595  | 1.64588612  | 1.10133211  |
| C | 4.10326170  | -0.22683699 | 2.42476494  |
| C | 3.96015016  | 2.02001500  | 3.41490415  |
| C | 3.55818171  | 0.27269442  | 1.21242998  |
| C | 3.41507017  | 2.51954641  | 2.20256919  |
| C | 4.84932590  | 0.14729189  | 4.73833699  |
| C | 4.44735746  | -1.60002869 | 2.53586282  |
| C | 4.16113438  | 2.89367529  | 4.51614124  |
| C | 2.66900596  | 2.14541753  | -0.11100285 |
| C | 3.35719749  | -0.60096587 | 0.11119290  |
| C | 3.07097441  | 3.89273811  | 2.09147132  |
| C | 4.99243745  | -2.09956010 | 3.74819778  |
| C | 4.70621436  | 2.39414388  | 5.72847620  |
| C | 2.81211751  | -0.10143446 | -1.10114206 |
| C | 2.52589442  | 4.39226952  | 0.87913636  |
| C | 5.19342169  | -1.22589983 | 4.84943492  |
| C | 5.05031015  | 1.02095216  | 5.83957413  |
| C | 2.46802172  | 1.27175726  | -1.21223999 |
| C | 2.32491018  | 3.51860925  | -0.22210078 |



|   |             |             |             |
|---|-------------|-------------|-------------|
| C | 4.24637323  | -2.47368876 | 1.43462583  |
| C | 3.81703863  | 4.26686677  | 4.40504327  |
| C | 3.70129324  | -1.97415735 | 0.22229087  |
| C | 3.27195864  | 4.76639818  | 3.19270831  |
| H | 5.61182814  | -1.60934294 | 5.78003002  |
| H | 5.46871660  | 0.63750905  | 6.77016923  |
| H | 2.04961527  | 1.65520037  | -2.14283509 |
| H | 1.90650373  | 3.90205236  | -1.15269588 |
| H | 4.51050309  | -3.52775855 | 1.51990517  |
| H | 3.54701661  | -2.64478399 | -0.62302499 |
| H | 3.97131526  | 4.93749340  | 5.25035912  |
| H | 3.00782878  | 5.82046796  | 3.10742896  |
| H | 5.25656732  | -3.15362969 | 3.83347727  |
| H | 2.65784084  | -0.77206086 | -1.94645788 |
| H | 4.86049103  | 3.06477027  | 6.57379201  |
| H | 2.26176455  | 5.44633911  | 0.79385686  |
| C | -3.66502134 | 4.62235603  | -3.39179263 |
| C | -4.54051207 | 5.87821379  | -0.99973561 |
| C | -4.34083844 | 3.86516427  | -2.39865016 |
| C | -3.42694960 | 6.00747667  | -3.18890659 |
| C | -4.77858381 | 4.49309315  | -1.20262165 |
| C | -3.86469496 | 6.63540554  | -1.99287808 |
| C | -3.22727597 | 3.99442715  | -4.58782114 |
| C | -4.57891018 | 2.48004363  | -2.60153621 |
| C | -2.75113249 | 6.76466842  | -4.18204905 |
| C | -4.97825744 | 6.50614266  | 0.19629290  |
| C | -5.45440091 | 3.73590139  | -0.20947919 |

|   |             |            |             |
|---|-------------|------------|-------------|
| C | -3.62662323 | 8.02052618 | -1.78999203 |
| C | -4.14116481 | 1.85211476 | -3.79756472 |
| C | -2.31338713 | 6.13673955 | -5.37807756 |
| C | -5.89214628 | 4.36383027 | 0.98654932  |
| C | -4.06436859 | 8.64845506 | -0.59396352 |
| C | -3.46534769 | 2.60930649 | -4.79070723 |
| C | -2.55145885 | 4.75161888 | -5.58096366 |
| C | -5.65407456 | 5.74895093 | 1.18943542  |
| C | -4.74018572 | 7.89126333 | 0.39917899  |
| C | -5.25472719 | 1.72285208 | -1.60839382 |
| C | -2.51306084 | 8.14978885 | -3.97916293 |
| C | -5.69247256 | 2.35078096 | -0.41236531 |
| C | -2.95080621 | 8.77771773 | -2.78313442 |
| H | -3.12933190 | 2.12730477 | -5.70878541 |
| H | -2.21544305 | 4.26961716 | -6.49904183 |
| H | -5.99009035 | 6.23095265 | 2.10751359  |
| H | -5.07620151 | 8.37326505 | 1.31725717  |
| H | -5.43747243 | 0.65962558 | -1.76413029 |
| H | -6.21123362 | 1.76955623 | 0.34997650  |
| H | -1.99429978 | 8.73101358 | -4.74150474 |
| H | -2.76806098 | 9.84094423 | -2.62739796 |
| H | -4.32390994 | 0.78888844 | -3.95330131 |
| H | -6.41090727 | 3.78260577 | 1.74889111  |
| H | -1.79462613 | 6.71796404 | -6.14041935 |
| H | -3.88162347 | 9.71168138 | -0.43822693 |
| C | -0.48559488 | 5.40137343 | -1.27459524 |
| C | 0.83544708  | 7.06229823 | -3.16186216 |

|   |             |            |             |
|---|-------------|------------|-------------|
| C | -0.27243938 | 6.77506392 | -0.98487253 |
| C | -0.03822941 | 4.85814534 | -2.50795141 |
| C | 0.38808161  | 7.60552632 | -1.92850599 |
| C | 0.62229157  | 5.68860774 | -3.45158487 |
| C | -1.14611587 | 4.57091103 | -0.33096177 |
| C | -0.71980485 | 7.31829201 | 0.24848365  |
| C | -0.25138492 | 3.48445485 | -2.79767412 |
| C | 1.49596806  | 7.89276062 | -4.10549563 |
| C | 0.60123711  | 8.97921680 | -1.63878328 |
| C | 1.06965705  | 5.14537965 | -4.68494105 |
| C | -1.38032584 | 6.48782961 | 1.19211711  |
| C | -0.91190590 | 2.65399245 | -1.85404065 |
| C | 1.26175810  | 9.80967920 | -2.58241675 |
| C | 1.73017803  | 5.97584204 | -5.62857451 |
| C | -1.59348137 | 5.11413909 | 0.90239444  |
| C | -1.35927140 | 3.19722051 | -0.62068444 |
| C | 1.70912360  | 9.26645115 | -3.81577296 |
| C | 1.94333357  | 7.34953257 | -5.33885184 |
| C | -0.50664932 | 8.69198231 | 0.53820621  |
| C | 0.19598054  | 2.94122695 | -4.03103014 |
| C | 0.15387166  | 9.52244471 | -0.40542726 |
| C | 0.85650152  | 3.77168934 | -4.97466361 |
| H | -2.10050097 | 4.47667150 | 1.62673277  |
| H | -1.86629101 | 2.55975292 | 0.10365389  |
| H | 2.21614320  | 9.90391873 | -4.54011129 |
| H | 2.45035317  | 7.98700015 | -6.06319017 |
| H | -0.85004961 | 9.10896731 | 1.48493743  |

|   |              |             |              |
|---|--------------|-------------|--------------|
| H | 0.31749103   | 10.57689736 | -0.18303444  |
| H | 0.03236116   | 1.88677429  | -4.25342296  |
| H | 1.19990180   | 3.35470435  | -5.92139484  |
| H | -1.72372613  | 6.90481439  | 2.13884823   |
| H | 1.42537752   | 10.86413170 | -2.36002411  |
| H | -1.07552532  | 1.59953995  | -2.07643329  |
| H | 2.07357832   | 5.55885727  | -6.57530563  |
| C | -9.55555230  | 2.80504229  | -8.42593788  |
| C | -8.04180863  | 3.36506032  | -10.76272187 |
| C | -9.09690021  | 4.12560418  | -8.67524621  |
| C | -9.25733255  | 1.76448942  | -9.34502154  |
| C | -8.34002837  | 4.40561319  | -9.84363820  |
| C | -8.50046072  | 2.04449844  | -10.51341354 |
| C | -10.31242413 | 2.52503327  | -7.25754588  |
| C | -9.39511995  | 5.16615705  | -7.75616254  |
| C | -9.71598464  | 0.44392754  | -9.09571322  |
| C | -7.28493679  | 3.64506934  | -11.93111386 |
| C | -7.88137628  | 5.72617508  | -10.09294653 |
| C | -8.20224097  | 1.00394557  | -11.43249721 |
| C | -10.15199179 | 4.88614803  | -6.58777055  |
| C | -10.47285648 | 0.16391852  | -7.92732122  |
| C | -7.12450445  | 6.00618409  | -11.26133852 |
| C | -7.44536914  | 1.28395458  | -12.60088920 |
| C | -10.61064391 | 3.56558613  | -6.33846217  |
| C | -10.77107626 | 1.20447138  | -7.00823751  |
| C | -6.82628467  | 4.96563124  | -12.18042224 |
| C | -6.98671702  | 2.60451648  | -12.85019758 |

|   |              |             |              |
|---|--------------|-------------|--------------|
| C | -8.93646788  | 6.48671870  | -8.00547093  |
| C | -9.41776488  | -0.59662511 | -10.01479682 |
| C | -8.17959604  | 6.76672772  | -9.17386293  |
| C | -8.66089305  | -0.31661609 | -11.18318881 |
| H | -11.19162297 | 3.35064964  | -5.44159793  |
| H | -11.35205531 | 0.98953489  | -6.11137327  |
| H | -6.24530561  | 5.18056773  | -13.07728647 |
| H | -6.40573796  | 2.81945297  | -13.74706181 |
| H | -9.16538305  | 7.28545303  | -7.29997708  |
| H | -7.82753209  | 7.78039856  | -9.36523341  |
| H | -9.76982884  | -1.61029595 | -9.82342634  |
| H | -8.43197788  | -1.11535042 | -11.88868267 |
| H | -10.38090700 | 5.68488212  | -5.88227671  |
| H | -6.77244048  | 7.01985472  | -11.45270912 |
| H | -10.82492045 | -0.84975211 | -7.73595063  |
| H | -7.21645392  | 0.48522049  | -13.30638304 |
| C | -4.18795389  | 1.77485261  | 6.54007002   |
| C | -1.36740704  | 1.55443298  | 6.78812276   |
| C | -3.34465512  | 2.75231054  | 5.94861145   |
| C | -3.62097924  | 0.68718486  | 7.25555496   |
| C | -1.93438169  | 2.64210073  | 6.07263782   |
| C | -2.21070582  | 0.57697505  | 7.37958134   |
| C | -5.59822732  | 1.88506242  | 6.41604365   |
| C | -3.91162976  | 3.83997828  | 5.23312651   |
| C | -4.46427802  | -0.29027307 | 7.84701354   |
| C | 0.04286638   | 1.44422317  | 6.91214914   |
| C | -1.09108291  | 3.61955866  | 5.48117925   |

|   |              |             |            |
|---|--------------|-------------|------------|
| C | -1.64373117  | -0.51069269 | 8.09506628 |
| C | -5.32190319  | 3.95018809  | 5.10910013 |
| C | -5.87455145  | -0.18006326 | 7.72298716 |
| C | 0.31919051   | 3.50934885  | 5.60520562 |
| C | -0.23345774  | -0.62090251 | 8.21909265 |
| C | -6.16520203  | 2.97273016  | 5.70055870 |
| C | -6.44152615  | 0.90760449  | 7.00750222 |
| C | 0.88616522   | 2.42168110  | 6.32069057 |
| C | 0.60984109   | 0.35655542  | 7.62763408 |
| C | -3.06833101  | 4.81743601  | 4.64166806 |
| C | -3.89730334  | -1.37794061 | 8.56249835 |
| C | -1.65805759  | 4.70722620  | 4.76569443 |
| C | -2.48702992  | -1.48815042 | 8.68652472 |
| H | -7.24773580  | 3.05732783  | 5.60535536 |
| H | -7.52405993  | 0.99220216  | 6.91229888 |
| H | 1.96869899   | 2.33708343  | 6.41589391 |
| H | 1.69237487   | 0.27195775  | 7.72283742 |
| H | -3.50354397  | 5.65233598  | 4.09245773 |
| H | -1.01073665  | 5.45752849  | 4.31168745 |
| H | -4.54462428  | -2.12824291 | 9.01650533 |
| H | -2.05181696  | -2.32305040 | 9.23573505 |
| H | -5.75711623  | 4.78508787  | 4.55988993 |
| H | 0.96651148   | 4.25965093  | 5.15119877 |
| H | -6.52187241  | -0.93036535 | 8.17699401 |
| H | 0.20175530   | -1.45580228 | 8.76830286 |
| C | -12.61954159 | 0.52427408  | 0.06351266 |
| C | -12.90228003 | 2.40341436  | 2.17407900 |

|   |              |             |             |
|---|--------------|-------------|-------------|
| C | -12.97091074 | 0.08140935  | 1.36612949  |
| C | -12.40954166 | 1.90670895  | -0.18382101 |
| C | -13.11227996 | 1.02097949  | 2.42141267  |
| C | -12.55091088 | 2.84627909  | 0.87146217  |
| C | -12.47817236 | -0.41529606 | -0.99177052 |
| C | -13.18091066 | -1.30102552 | 1.61346316  |
| C | -12.05817251 | 2.34957368  | -1.48643785 |
| C | -13.04364925 | 3.34298449  | 3.22936218  |
| C | -13.46364911 | 0.57811476  | 3.72402951  |
| C | -12.34091095 | 4.22871395  | 0.62412850  |
| C | -13.03954144 | -2.24059566 | 0.55817999  |
| C | -11.91680329 | 1.41000354  | -2.54172102 |
| C | -13.60501833 | 1.51768490  | 4.77931268  |
| C | -12.48228018 | 5.16828409  | 1.67941167  |
| C | -12.68817229 | -1.79773097 | -0.74443690 |
| C | -12.12680321 | 0.02756863  | -2.29438740 |
| C | -13.39501841 | 2.90011980  | 4.53197906  |
| C | -12.83364933 | 4.72541940  | 2.98202856  |
| C | -13.53227976 | -1.74389007 | 2.91607985  |
| C | -11.84817264 | 3.73200837  | -1.73377136 |
| C | -13.67364898 | -0.80431993 | 3.97136302  |
| C | -11.98954186 | 4.67157851  | -0.67848819 |
| H | -12.57965648 | -2.51895026 | -1.55447817 |
| H | -12.01828740 | -0.69365066 | -3.10442867 |
| H | -13.50353421 | 3.62133910  | 5.34202033  |
| H | -12.94216514 | 5.44663870  | 3.79206983  |
| H | -13.69347690 | -2.80505496 | 3.10593460  |

|   |              |             |             |
|---|--------------|-------------|-------------|
| H | -13.94336194 | -1.14426545 | 4.97125913  |
| H | -11.57845967 | 4.07195388  | -2.73366747 |
| H | -11.82834471 | 5.73274339  | -0.86834294 |
| H | -13.20073853 | -3.30176041 | 0.74803454  |
| H | -13.87473124 | 1.17773960  | 5.77920868  |
| H | -11.64709037 | 1.74994884  | -3.54161702 |
| H | -12.32108309 | 6.22944884  | 1.48955712  |
| C | -6.80120050  | 5.50881341  | -4.90208097 |
| C | -6.30229334  | 3.28356342  | -6.59469836 |
| C | -6.07404512  | 5.68384319  | -6.10914755 |
| C | -7.27890229  | 4.22115863  | -4.54132309 |
| C | -5.82459155  | 4.57121819  | -6.95545624 |
| C | -7.02944871  | 3.10853364  | -5.38763179 |
| C | -7.05065407  | 6.62143841  | -4.05577228 |
| C | -5.59634333  | 6.97149797  | -6.46990543 |
| C | -8.00605766  | 4.04612885  | -3.33425652 |
| C | -6.05283976  | 2.17093842  | -7.44100706 |
| C | -5.09743617  | 4.74624797  | -8.16252282 |
| C | -7.50715051  | 1.82087886  | -5.02687391 |
| C | -5.84579691  | 8.08412296  | -5.62359673 |
| C | -8.25551124  | 5.15875385  | -2.48794782 |
| C | -4.84798259  | 3.63362297  | -9.00883151 |
| C | -7.25769693  | 0.70825386  | -5.87318260 |
| C | -6.57295229  | 7.90909323  | -4.41653012 |
| C | -7.77780946  | 6.44640867  | -2.84870567 |
| C | -5.32568438  | 2.34596815  | -8.64807367 |
| C | -6.53054155  | 0.88328360  | -7.08024921 |



|   |             |             |             |
|---|-------------|-------------|-------------|
| C | -4.86918807 | 7.14652760  | -7.67697185 |
| C | -8.48375934 | 2.75847422  | -2.97349879 |
| C | -4.61973449 | 6.03390261  | -8.52328055 |
| C | -8.23430576 | 1.64584922  | -3.81980748 |
| H | -6.76443425 | 8.76315040  | -3.76689883 |
| H | -7.96929142 | 7.30046585  | -2.19907438 |
| H | -5.13420242 | 1.49191098  | -9.29770496 |
| H | -6.33905958 | 0.02922642  | -7.72988050 |
| H | -4.50250144 | 8.13493875  | -7.95389167 |
| H | -4.06156588 | 6.16825648  | -9.44983173 |
| H | -9.04192796 | 2.62412034  | -2.04694761 |
| H | -8.60099239 | 0.65743808  | -3.54288766 |
| H | -5.47911040 | 9.07253401  | -5.90051637 |
| H | -4.28981409 | 3.76797666  | -9.93538258 |
| H | -8.81367975 | 5.02440016  | -1.56139676 |
| H | -7.62438343 | -0.28015719 | -5.59626297 |
| C | -0.32176670 | -2.27901337 | -1.85159846 |
| C | 1.49881750  | -4.29054459 | -1.01206595 |
| C | 0.71921151  | -2.70170219 | -2.71998696 |
| C | -0.45245281 | -2.86209016 | -0.56344370 |
| C | 1.62950361  | -3.70746780 | -2.30022071 |
| C | 0.45783929  | -3.86785576 | -0.14367745 |
| C | -1.23205881 | -1.27324776 | -2.27136471 |
| C | 0.84989762  | -2.11862541 | -4.00814172 |
| C | -1.49343103 | -2.43940133 | 0.30494480  |
| C | 2.40910960  | -5.29631019 | -0.59229970 |
| C | 2.67048183  | -4.13015663 | -3.16860921 |

|   |              |             |             |
|---|--------------|-------------|-------------|
| C | 0.32715318   | -4.45093255 | 1.14447731  |
| C | -0.06039448  | -1.11285980 | -4.42790798 |
| C | -2.40372313  | -1.43363572 | -0.11482145 |
| C | 3.58077393   | -5.13592223 | -2.74884296 |
| C | 1.23744528   | -5.45669815 | 1.56424357  |
| C | -1.10137273  | -0.69017094 | -3.55951949 |
| C | -2.27303706  | -0.85055890 | -1.40297623 |
| C | 3.45008786   | -5.71899906 | -1.46068818 |
| C | 2.27842353   | -5.87938702 | 0.69585508  |
| C | 1.89087572   | -2.54131425 | -4.87653002 |
| C | -1.62411703  | -3.02247810 | 1.59309935  |
| C | 2.80116783   | -3.54707986 | -4.45676376 |
| C | -0.71382492  | -4.02824371 | 2.01286560  |
| H | -1.80011804  | 0.08186037  | -3.88173442 |
| H | -2.97178237  | -0.07852759 | -1.72519116 |
| H | 4.14883317   | -6.49103037 | -1.13847325 |
| H | 2.97716884   | -6.65141833 | 1.01807001  |
| H | 1.99119114   | -2.09374120 | -5.86532496 |
| H | 3.60022863   | -3.87153820 | -5.12334374 |
| H | -2.42317784  | -2.69801976 | 2.25967933  |
| H | -0.81414034  | -4.47581676 | 3.00166055  |
| H | 0.03992079   | -0.66528672 | -5.41670273 |
| H | 4.37983466   | -5.46038063 | -3.41542271 |
| H | -3.20278387  | -1.10917733 | 0.55175830  |
| H | 1.13713001   | -5.90427124 | 2.55303832  |
| C | -9.58750489  | 0.94109558  | 2.93977916  |
| C | -10.22570292 | 0.07333291  | 5.56757115  |

|   |              |             |             |
|---|--------------|-------------|-------------|
| C | -9.71928591  | 1.88956670  | 3.98831928  |
| C | -9.77482289  | -0.44125687 | 3.20513503  |
| C | -10.03838492 | 1.45568536  | 5.30221527  |
| C | -10.09392190 | -0.87513821 | 4.51903103  |
| C | -9.26840588  | 1.37497692  | 1.62588316  |
| C | -9.53196792  | 3.27191915  | 3.72296340  |
| C | -9.64304187  | -1.38972799 | 2.15659491  |
| C | -10.54480193 | -0.36054843 | 6.88146714  |
| C | -10.17016594 | 2.40415648  | 6.35075539  |
| C | -10.28123990 | -2.25749066 | 4.78438690  |
| C | -9.21286890  | 3.70580049  | 2.40906741  |
| C | -9.32394286  | -0.95584665 | 0.84269892  |
| C | -10.48926495 | 1.97027514  | 7.66465138  |
| C | -10.60033891 | -2.69137200 | 6.09828290  |
| C | -9.08108787  | 2.75732939  | 1.36052723  |
| C | -9.13662485  | 0.42650582  | 0.57734299  |
| C | -10.67658296 | 0.58792267  | 7.93000731  |
| C | -10.73211994 | -1.74290090 | 7.14682307  |
| C | -9.66374894  | 4.22039004  | 4.77150344  |
| C | -9.83035986  | -2.77208022 | 2.42195087  |
| C | -9.98284795  | 3.78650870  | 6.08539944  |
| C | -10.14945887 | -3.20596155 | 3.73584686  |
| H | -8.83614568  | 3.09037913  | 0.35197331  |
| H | -8.89168266  | 0.75955556  | -0.43121093 |
| H | -10.92152515 | 0.25487293  | 8.93856123  |
| H | -10.97706213 | -2.07595064 | 8.15537699  |
| H | -9.51996258  | 5.28149167  | 4.56781478  |

|   |              |             |            |
|---|--------------|-------------|------------|
| H | -10.08400381 | 4.51456056  | 6.89026480 |
| H | -9.72920400  | -3.50013207 | 1.61708550 |
| H | -10.29324523 | -4.26706319 | 3.93953553 |
| H | -9.06908254  | 4.76690191  | 2.20537861 |
| H | -10.59042083 | 2.69832675  | 8.46951673 |
| H | -9.22278698  | -1.68389826 | 0.03783358 |
| H | -10.74412527 | -3.75247342 | 6.30197169 |
| K | 0.20465800   | 0.10074000  | 0.48149700 |

### Structures in Fig. 6

Values in parenthesis are the energies of the structures when the reference is the global minimum (*cf.* Fig. 6).

73

n = 2, Energy = -197.977000607820 (47.1)

|   |            |             |             |
|---|------------|-------------|-------------|
| C | 2.64885476 | -0.07507234 | -1.40134079 |
| C | 3.04163470 | -0.81860650 | 1.31131112  |
| C | 3.04839924 | 0.89930192  | -0.44878681 |
| C | 2.44570025 | -1.42121368 | -0.99756881 |
| C | 3.24478921 | 0.52753484  | 0.90753915  |
| C | 2.64209022 | -1.79298076 | 0.35875714  |
| C | 2.45246478 | 0.29669475  | -2.75766674 |
| C | 3.25155374 | 2.24544327  | -0.85255878 |
| C | 2.04615577 | -2.39558794 | -1.95012279 |
| C | 3.23802468 | -1.19037358 | 2.66763707  |
| C | 3.64433369 | 1.50190910  | 1.86009313  |
| C | 2.43893572 | -3.13912211 | 0.76252911  |
| C | 3.05516377 | 2.61721035  | -2.20888474 |

|   |            |             |             |
|---|------------|-------------|-------------|
| C | 1.84976580 | -2.02382086 | -3.30644875 |
| C | 3.84072366 | 1.13014202  | 3.21641908  |
| C | 2.63532569 | -3.51088919 | 2.11885507  |
| C | 2.65561928 | 1.64283610  | -3.16143877 |
| C | 2.05292030 | -0.67767950 | -3.71022078 |
| C | 3.63756916 | -0.21599934 | 3.62019111  |
| C | 3.03487018 | -2.53651494 | 3.07140910  |
| C | 3.65109816 | 3.21981730  | 0.09999515  |
| C | 1.84300133 | -3.74172906 | -1.54635077 |
| C | 3.84748814 | 2.84805022  | 1.45632110  |
| C | 2.03939130 | -4.11349614 | -0.19002481 |
| H | 2.50486924 | 1.92820660  | -4.20256217 |
| H | 1.90217025 | -0.39230901 | -4.75134417 |
| H | 3.78831921 | -0.50136983 | 4.66131450  |
| H | 3.18562022 | -2.82188544 | 4.11253250  |
| H | 3.80704072 | 4.25312308  | -0.20994251 |
| H | 4.15418076 | 3.59598548  | 2.18750695  |
| H | 1.53630870 | -4.48966431 | -2.27753662 |
| H | 1.88344874 | -5.14680192 | 0.11991284  |
| H | 3.21110626 | 3.65051592  | -2.51882250 |
| H | 4.14741623 | 1.87807703  | 3.94760494  |
| H | 1.54307323 | -2.77175587 | -4.03763461 |
| H | 2.47938320 | -4.54419476 | 2.42879283  |
| C | 6.21704019 | -2.41624618 | 0.08005912  |
| C | 6.22488702 | -0.43258560 | -1.95233568 |
| C | 6.56515787 | -1.07652729 | 0.39686731  |
| C | 5.87284593 | -2.76413479 | -1.25294647 |

|   |            |             |             |
|---|------------|-------------|-------------|
| C | 6.56908128 | -0.08469699 | -0.61933009 |
| C | 5.87676934 | -1.77230450 | -2.26914387 |
| C | 6.21311677 | -3.40807648 | 1.09625653  |
| C | 6.90935213 | -0.72863868 | 1.72987290  |
| C | 5.52472825 | -4.10385369 | -1.56975466 |
| C | 6.22881044 | 0.55924469  | -2.96853308 |
| C | 6.91719896 | 1.25502191  | -0.30252190 |
| C | 5.53257508 | -2.12019311 | -3.60214946 |
| C | 6.90542871 | -1.72046897 | 2.74607030  |
| C | 5.52080483 | -5.09568398 | -0.55355725 |
| C | 6.92112238 | 2.24685220  | -1.31871930 |
| C | 5.53649850 | -1.12836282 | -4.61834686 |
| C | 6.55731104 | -3.06018791 | 2.42926216  |
| C | 5.86499910 | -4.74779542 | 0.77944838  |
| C | 6.57692812 | 1.89896363  | -2.65172493 |
| C | 5.88461618 | 0.21135612  | -4.30153871 |
| C | 7.25746974 | 0.61108006  | 2.04668093  |
| C | 5.18053406 | -4.45174214 | -2.90276009 |
| C | 7.26139316 | 1.60291035  | 1.03048353  |
| C | 5.18445747 | -3.45991184 | -3.91895749 |
| H | 6.55429940 | -3.82152239 | 3.20930097  |
| H | 5.86198746 | -5.50912990 | 1.55948719  |
| H | 6.57993975 | 2.66029811  | -3.43176374 |
| H | 5.88762781 | 0.97269061  | -5.08157752 |
| H | 7.52167522 | 0.87812136  | 3.06990362  |
| H | 7.52861027 | 2.63128621  | 1.27366732  |
| H | 4.91331694 | -5.48011800 | -3.14594388 |

|   |            |             |             |
|---|------------|-------------|-------------|
| H | 4.92025199 | -3.72695314 | -4.94218017 |
| H | 7.16963413 | -1.45342788 | 3.76929288  |
| H | 7.18833943 | 3.27522794  | -1.07553571 |
| H | 5.25358778 | -6.12405973 | -0.79674084 |
| H | 5.27229308 | -1.39540391 | -5.64156943 |
| K | 0.20465800 | 0.10074000  | 0.48149700  |

109

n = 3, Energy = -342.650808225643 (12.0)

|   |            |             |             |
|---|------------|-------------|-------------|
| C | 4.60620463 | 0.85898552  | 0.09312148  |
| C | 6.84874473 | 2.53630582  | 0.56557256  |
| C | 4.96716159 | 1.84718314  | -0.86059526 |
| C | 5.36651772 | 0.70944806  | 1.28306376  |
| C | 6.08843164 | 2.68584329  | -0.62436972 |
| C | 6.48778776 | 1.54810821  | 1.51928930  |
| C | 3.48493458 | 0.02032537  | -0.14310407 |
| C | 4.20684851 | 1.99672060  | -2.05053754 |
| C | 5.00556075 | -0.27874956 | 2.23678050  |
| C | 7.97001478 | 3.37496597  | 0.80179811  |
| C | 6.44938861 | 3.67404090  | -1.57808646 |
| C | 7.24810085 | 1.39857074  | 2.70923159  |
| C | 3.08557846 | 1.15806045  | -2.28676309 |
| C | 3.88429070 | -1.11740971 | 2.00055496  |
| C | 7.57065866 | 4.51270105  | -1.34186092 |
| C | 8.36937090 | 2.23723089  | 2.94545713  |
| C | 2.72462145 | 0.16986280  | -1.33304636 |
| C | 3.12397757 | -0.96787228 | 0.81061266  |
| C | 8.33097179 | 4.36316362  | -0.15191862 |

|   |             |             |             |
|---|-------------|-------------|-------------|
| C | 8.73032791  | 3.22542854  | 1.99174040  |
| C | 4.56780551  | 2.98491810  | -3.00425408 |
| C | 5.76587380  | -0.42828691 | 3.42672258  |
| C | 5.68907556  | 3.82357826  | -2.76802853 |
| C | 6.88714385  | 0.41037324  | 3.66294812  |
| H | 1.86392828  | -0.47389743 | -1.51437441 |
| H | 2.26328441  | -1.61163251 | 0.62928462  |
| H | 9.19166495  | 5.00692385  | 0.02940943  |
| H | 9.59102107  | 3.86918877  | 2.17306845  |
| H | 3.98418486  | 3.09970393  | -3.91766057 |
| H | 5.96614817  | 4.58212438  | -3.50010695 |
| H | 5.48880119  | -1.18683303 | 4.15880100  |
| H | 7.47076450  | 0.29558741  | 4.57635461  |
| H | 2.50195780  | 1.27284613  | -3.20016938 |
| H | 7.84773135  | 5.27124710  | -2.07393912 |
| H | 3.60721801  | -1.87595576 | 2.73263316  |
| H | 8.95299156  | 2.12244521  | 3.85886342  |
| C | 1.06257932  | 3.84028299  | 0.66650269  |
| C | 1.61970543  | 2.54638446  | 3.13247848  |
| C | 0.07467318  | 3.02514074  | 1.27967854  |
| C | 2.32904852  | 4.00847598  | 1.28631473  |
| C | 0.35323623  | 2.37819147  | 2.51266643  |
| C | 2.60761157  | 3.36152671  | 2.51930262  |
| C | 0.78401627  | 4.48723226  | -0.56648521 |
| C | -1.19179602 | 2.85694775  | 0.65986650  |
| C | 3.31695467  | 4.82361823  | 0.67313887  |
| C | 1.89826848  | 1.89943519  | 4.36546637  |



|   |             |             |             |
|---|-------------|-------------|-------------|
| C | -0.63466992 | 1.56304922  | 3.12584229  |
| C | 3.87408077  | 3.52971970  | 3.13911466  |
| C | -1.47035907 | 3.50389702  | -0.57312140 |
| C | 3.03839162  | 5.47056750  | -0.55984902 |
| C | -0.35610687 | 0.91609995  | 4.35883018  |
| C | 4.15264382  | 2.88277043  | 4.37210256  |
| C | -0.48245294 | 4.31903930  | -1.18629730 |
| C | 1.77192241  | 5.30237454  | -1.17966112 |
| C | 0.91036234  | 1.08429291  | 4.97864228  |
| C | 3.16473769  | 2.06762815  | 4.98527846  |
| C | -2.17970195 | 2.04180559  | 1.27304235  |
| C | 4.58342365  | 4.99181112  | 1.29295091  |
| C | -1.90113890 | 1.39485633  | 2.50603025  |
| C | 4.86198670  | 4.34486185  | 2.52593881  |
| H | -0.69627950 | 4.81564118  | -2.13274571 |
| H | 1.55809585  | 5.79897642  | -2.12610952 |
| H | 1.12418890  | 0.58769103  | 5.92509069  |
| H | 3.37856425  | 1.57102627  | 5.93172687  |
| H | -3.15185094 | 1.91269969  | 0.79727111  |
| H | -2.65946130 | 0.76914849  | 2.97670752  |
| H | 5.34174605  | 5.61751896  | 0.82227364  |
| H | 5.83413569  | 4.47396776  | 3.00171005  |
| H | -2.44250785 | 3.37479124  | -1.04889269 |
| H | -1.11442904 | 0.29039218  | 4.82950751  |
| H | 3.79671379  | 6.09627527  | -1.03052635 |
| H | 5.12479260  | 3.01187621  | 4.84787385  |
| C | -0.73439172 | -1.90194833 | -1.87629745 |

|   |             |             |             |
|---|-------------|-------------|-------------|
| C | -1.77675543 | -2.37094632 | 0.72353299  |
| C | -0.03454932 | -2.74389015 | -0.97199956 |
| C | -1.95541597 | -1.29450551 | -1.48068012 |
| C | -0.55573118 | -2.97838914 | 0.32791566  |
| C | -2.47659783 | -1.52900450 | -0.18076490 |
| C | -0.21320986 | -1.66744934 | -3.17621267 |
| C | 1.18647493  | -3.35133297 | -1.36761689 |
| C | -2.65525837 | -0.45256369 | -2.38497801 |
| C | -2.29793729 | -2.60544531 | 2.02344820  |
| C | 0.14411122  | -3.82033096 | 1.23221355  |
| C | -3.69762208 | -0.92156168 | 0.21485242  |
| C | 1.70765678  | -3.11683398 | -2.66753210 |
| C | -2.13407651 | -0.21806470 | -3.68489323 |
| C | -0.37707064 | -4.05482995 | 2.53212877  |
| C | -4.21880393 | -1.15606067 | 1.51476764  |
| C | 1.00781441  | -2.27489215 | -3.57183005 |
| C | -0.91305224 | -0.82550751 | -4.08051061 |
| C | -1.59809491 | -3.44738713 | 2.92774615  |
| C | -3.51896156 | -1.99800249 | 2.41906559  |
| C | 1.88631714  | -4.19327465 | -0.46331904 |
| C | -3.87628243 | 0.15487899  | -1.98936064 |
| C | 1.36513528  | -4.42777364 | 0.83659617  |
| C | -4.39746429 | -0.07962000 | -0.68944542 |
| H | 1.40787652  | -2.09488941 | -4.56965225 |
| H | -0.51299013 | -0.64550477 | -5.07833281 |
| H | -1.99815702 | -3.62738987 | 3.92556835  |
| H | -3.91902367 | -2.17800523 | 3.41688778  |

|   |             |             |             |
|---|-------------|-------------|-------------|
| H | 2.82358232  | -4.65955123 | -0.76699714 |
| H | 1.90233831  | -5.07405298 | 1.53074038  |
| H | -4.41348546 | 0.80115834  | -2.68350484 |
| H | -5.33472947 | 0.38665658  | -0.38576732 |
| H | 2.64492180  | -3.58311041 | -2.97121031 |
| H | 0.16013218  | -4.70110916 | 3.22627298  |
| H | -2.67127933 | 0.42821451  | -4.37903744 |
| H | -5.15606895 | -0.68978423 | 1.81844584  |
| K | 0.20465800  | 0.10074000  | 0.48149700  |

109

n = 3, Energy = -333.584116150996 (21.1)

|   |             |             |             |
|---|-------------|-------------|-------------|
| C | -0.56281630 | -0.67002053 | -2.30873304 |
| C | -3.35774867 | -0.20827994 | -2.10687121 |
| C | -1.15964849 | 0.39884572  | -3.02825813 |
| C | -1.36345029 | -1.50801648 | -1.48827703 |
| C | -2.55711467 | 0.62971601  | -2.92732722 |
| C | -2.76091648 | -1.27714619 | -1.38734611 |
| C | 0.83464989  | -0.90089082 | -2.40966395 |
| C | -0.35901449 | 1.23684167  | -3.84871414 |
| C | -0.76661811 | -2.57688273 | -0.76875193 |
| C | -4.75521485 | 0.02259035  | -2.00594030 |
| C | -3.15394686 | 1.69858226  | -3.64685232 |
| C | -3.56155047 | -2.11514214 | -0.56689010 |
| C | 1.03845169  | 1.00597138  | -3.94964506 |
| C | 0.63084808  | -2.80775302 | -0.86968285 |
| C | -4.55141304 | 1.92945255  | -3.54592140 |
| C | -4.95901666 | -1.88427185 | -0.46595919 |

|   |             |             |             |
|---|-------------|-------------|-------------|
| C | 1.63528394  | -0.06289488 | -3.23011996 |
| C | 1.43148213  | -1.96975708 | -1.69013886 |
| C | -5.35204710 | 1.09145661  | -2.72546539 |
| C | -5.55584891 | -0.81540559 | -1.18548428 |
| C | -0.95584670 | 2.30570773  | -4.56823909 |
| C | -1.56725208 | -3.41487850 | 0.05170393  |
| C | -2.35331288 | 2.53657802  | -4.46730818 |
| C | -2.96471827 | -3.18400820 | 0.15263484  |
| H | 2.70798681  | -0.24011221 | -3.30759510 |
| H | 2.50418500  | -2.14697441 | -1.76761399 |
| H | -6.42474996 | 1.26867393  | -2.64799025 |
| H | -6.62855177 | -0.63818826 | -1.10800915 |
| H | -0.34127549 | 2.94895821  | -5.19802581 |
| H | -2.81144466 | 3.35704586  | -5.01961975 |
| H | -1.10912031 | -4.23534633 | 0.60401550  |
| H | -3.57928947 | -3.82725869 | 0.78242156  |
| H | 1.65302294  | 1.64922166  | -4.57943163 |
| H | -5.00954490 | 2.74992021  | -4.09823282 |
| H | 1.08897993  | -3.62822068 | -0.31737142 |
| H | -5.57358790 | -2.52752214 | 0.16382738  |
| C | -2.85393079 | 4.61624350  | 4.06761682  |
| C | -0.79375044 | 6.08318806  | 2.77559125  |
| C | -1.54358416 | 4.63226335  | 4.61454930  |
| C | -3.13418725 | 5.33369593  | 2.87467156  |
| C | -0.51349398 | 5.36573563  | 3.96853652  |
| C | -2.10409708 | 6.06716821  | 2.22865877  |
| C | -3.88402097 | 3.88277122  | 4.71362961  |

|   |             |            |             |
|---|-------------|------------|-------------|
| C | -1.26332770 | 3.91481093 | 5.80749457  |
| C | -4.44453389 | 5.31767607 | 2.32773908  |
| C | 0.23633973  | 6.81666034 | 2.12957846  |
| C | 0.79685265  | 5.38175549 | 4.51546900  |
| C | -2.38435353 | 6.78462063 | 1.03571350  |
| C | -2.29341788 | 3.18133864 | 6.45350736  |
| C | -5.47462406 | 4.58420379 | 2.97375186  |
| C | 1.82694283  | 6.11522777 | 3.86945621  |
| C | -1.35426336 | 7.51809292 | 0.38970072  |
| C | -3.60376455 | 3.16531876 | 5.90657490  |
| C | -5.19436765 | 3.86675133 | 4.16669716  |
| C | 1.54668641  | 6.83268023 | 2.67651092  |
| C | -0.04391668 | 7.53411280 | 0.93663317  |
| C | 0.04701878  | 3.93083085 | 6.35442688  |
| C | -4.72479019 | 6.03512843 | 1.13479398  |
| C | 1.07710896  | 4.66430313 | 5.70841409  |
| C | -3.69470002 | 6.76860071 | 0.48878119  |
| H | -4.39446754 | 2.60230133 | 6.40245793  |
| H | -5.98507063 | 3.30373390 | 4.66258019  |
| H | 2.33738940  | 7.39569766 | 2.18062789  |
| H | 0.74678630  | 8.09713023 | 0.44075014  |
| H | 0.26214526  | 3.38011028 | 7.27013847  |
| H | 2.08293850  | 4.67660005 | 6.12824260  |
| H | -5.73061974 | 6.02283151 | 0.71496547  |
| H | -3.90982649 | 7.31932128 | -0.42693040 |
| H | -2.07829160 | 2.63061811 | 7.36921880  |
| H | 2.83277226  | 6.12752479 | 4.28928452  |

|   |             |            |             |
|---|-------------|------------|-------------|
| H | -6.48045350 | 4.57190677 | 2.55392355  |
| H | -1.56938964 | 8.06881345 | -0.52601073 |
| C | -1.32059601 | 2.68934393 | 0.96969147  |
| C | 0.51968635  | 1.87062298 | 2.97185439  |
| C | -1.75248174 | 1.85004346 | 2.03056353  |
| C | 0.03143090  | 3.11928393 | 0.90990088  |
| C | -0.83234056 | 1.44068299 | 3.03164499  |
| C | 0.95157208  | 2.70992345 | 1.91098234  |
| C | -2.24073719 | 3.09870441 | -0.03138999 |
| C | -3.10450865 | 1.42010347 | 2.09035412  |
| C | 0.46331663  | 3.95858440 | -0.15097117 |
| C | 1.43982753  | 1.46126251 | 3.97293585  |
| C | -1.26422629 | 0.60138252 | 4.09251704  |
| C | 2.30359899  | 3.13986345 | 1.85119175  |
| C | -4.02464983 | 1.82946395 | 1.08927266  |
| C | -0.45682455 | 4.36794487 | -1.15205263 |
| C | -0.34408511 | 0.19202204 | 5.09359850  |
| C | 3.22374017  | 2.73050297 | 2.85227321  |
| C | -3.59276413 | 2.66876443 | 0.02840057  |
| C | -1.80885150 | 3.93800490 | -1.09226208 |
| C | 1.00794184  | 0.62196202 | 5.03380795  |
| C | 2.79185448  | 1.89120248 | 3.91314530  |
| C | -3.53639420 | 0.58080312 | 3.15122607  |
| C | 1.81534337  | 4.38852427 | -0.21076166 |
| C | -2.61625302 | 0.17144265 | 4.15230753  |
| C | 2.73548455  | 3.97916379 | 0.79031980  |
| H | -4.29906965 | 2.98299182 | -0.74003517 |

|   |             |             |             |
|---|-------------|-------------|-------------|
| H | -2.51515701 | 4.25223229  | -1.86069781 |
| H | 1.71424736  | 0.30773463  | 5.80224368  |
| H | 3.49816000  | 1.57697509  | 4.68158103  |
| H | -4.57421777 | 0.25077872  | 3.19712168  |
| H | -2.94777099 | -0.47280918 | 4.96663896  |
| H | 2.14686133  | 5.03277610  | -1.02509309 |
| H | 3.77330811  | 4.30918820  | 0.74442419  |
| H | -5.06247325 | 1.49943968  | 1.13516813  |
| H | -0.67560287 | -0.45222968 | 5.90792987  |
| H | -0.12530679 | 5.01219660  | -1.96638400 |
| H | 4.26156360  | 3.06052723  | 2.80637774  |
| K | 0.20465800  | 0.10074000  | 0.48149700  |

109

n = 3, Energy = -314.581419843304 (40.1)

|   |            |             |             |
|---|------------|-------------|-------------|
| C | 3.53960254 | 1.37196293  | -0.80903850 |
| C | 3.51238773 | 1.23434793  | 2.02749477  |
| C | 4.57313944 | 0.68218472  | -0.12171937 |
| C | 2.49245824 | 1.99293364  | -0.07809099 |
| C | 4.55953203 | 0.61337722  | 1.29654726  |
| C | 2.47885083 | 1.92412614  | 1.34017564  |
| C | 3.55320995 | 1.44077043  | -2.22730513 |
| C | 5.62028375 | 0.06121402  | -0.85266688 |
| C | 1.45892134 | 2.68271184  | -0.76541012 |
| C | 3.49878032 | 1.16554043  | 3.44576140  |
| C | 5.59306893 | -0.07640098 | 1.98386639  |
| C | 1.43170652 | 2.54509684  | 2.07112315  |
| C | 5.63389116 | 0.13002152  | -2.27093351 |

|   |             |             |             |
|---|-------------|-------------|-------------|
| C | 1.47252875  | 2.75151934  | -2.18367675 |
| C | 5.57946152  | -0.14520848 | 3.40213302  |
| C | 1.41809911  | 2.47628934  | 3.48938978  |
| C | 4.60035426  | 0.81979973  | -2.95825270 |
| C | 2.51967305  | 2.13054864  | -2.91462432 |
| C | 4.53231721  | 0.47576222  | 4.13308059  |
| C | 2.45163601  | 1.78651113  | 4.17670897  |
| C | 6.65382045  | -0.62856406 | -0.16534775 |
| C | 0.41177723  | 3.30368242  | -0.03446261 |
| C | 6.64021304  | -0.69737156 | 1.25291889  |
| C | 0.39816982  | 3.23487492  | 1.38380402  |
| H | 4.61079938  | 0.87261675  | -4.04692210 |
| H | 2.53011818  | 2.18336566  | -4.00329372 |
| H | 4.52187209  | 0.42294520  | 5.22174999  |
| H | 2.44119089  | 1.73369411  | 5.26537838  |
| H | 7.45761440  | -1.10522472 | -0.72642721 |
| H | 7.43356186  | -1.22684925 | 1.78050895  |
| H | -0.38157160 | 3.83316011  | -0.56205268 |
| H | -0.40562413 | 3.71153558  | 1.94488348  |
| H | 6.43768491  | -0.34663901 | -2.83201303 |
| H | 6.37281015  | -0.67468605 | 3.92972315  |
| H | 0.67918012  | 3.28099691  | -2.71126688 |
| H | 0.61430536  | 2.95294987  | 4.05046930  |
| C | -0.49384540 | -3.18099792 | -1.29211774 |
| C | -0.65840690 | -3.47369227 | 1.52796188  |
| C | -1.31494174 | -2.30487789 | -0.53408438 |
| C | 0.24497019  | -4.20346513 | -0.64011129 |



|   |             |             |             |
|---|-------------|-------------|-------------|
| C | -1.39722249 | -2.45122506 | 0.87595542  |
| C | 0.16268943  | -4.34981230 | 0.76992852  |
| C | -0.41156465 | -3.03465075 | -2.70215755 |
| C | -2.05375732 | -1.28241068 | -1.18609084 |
| C | 1.06606652  | -5.07958517 | -1.39814464 |
| C | -0.74068765 | -3.62003944 | 2.93800169  |
| C | -2.21831882 | -1.57510503 | 1.63398878  |
| C | 0.90150502  | -5.37227951 | 1.42193498  |
| C | -1.97147657 | -1.13606350 | -2.59613064 |
| C | 1.14834727  | -4.93323799 | -2.80818445 |
| C | -2.30059957 | -1.72145220 | 3.04402859  |
| C | 0.81922427  | -5.51862669 | 2.83197478  |
| C | -1.15038023 | -2.01218353 | -3.35416406 |
| C | 0.40953169  | -3.91077078 | -3.46019096 |
| C | -1.56178399 | -2.74391941 | 3.69603510  |
| C | -0.00187207 | -4.64250666 | 3.59000820  |
| C | -2.87485351 | -0.40629083 | -0.42805749 |
| C | 1.80488196  | -6.10205219 | -0.74613818 |
| C | -2.95713426 | -0.55263800 | 0.98198232  |
| C | 1.72260120  | -6.24839936 | 0.66390163  |
| H | -1.08722107 | -1.89984662 | -4.43651851 |
| H | 0.47269086  | -3.79843387 | -4.54254541 |
| H | -1.62494316 | -2.85625632 | 4.77838955  |
| H | -0.06503123 | -4.75484357 | 4.67236265  |
| H | -3.44197257 | 0.37856084  | -0.92854135 |
| H | -3.58741249 | 0.11987674  | 1.56385303  |
| H | 2.43516019  | -6.77456694 | -1.32800889 |

|   |             |             |             |
|---|-------------|-------------|-------------|
| H | 2.28972027  | -7.03325103 | 1.16438549  |
| H | -2.53859548 | -0.35121202 | -3.09661457 |
| H | -2.93087766 | -1.04893764 | 3.62589935  |
| H | 1.77862536  | -5.60575255 | -3.39005521 |
| H | 1.38634318  | -6.30347817 | 3.33245871  |
| C | 4.48007433  | -3.67605429 | 0.37927486  |
| C | 6.11292750  | -5.29909315 | 2.04214433  |
| C | 5.48119854  | -4.50181360 | -0.19715548 |
| C | 4.29537670  | -3.66181441 | 1.78713994  |
| C | 6.29762513  | -5.31333303 | 0.63427925  |
| C | 5.11180329  | -4.47333384 | 2.61857468  |
| C | 3.66364774  | -2.86453486 | -0.45215988 |
| C | 5.66589617  | -4.51605348 | -1.60502057 |
| C | 3.29425248  | -2.83605510 | 2.36357029  |
| C | 6.92935409  | -6.11061257 | 2.87357907  |
| C | 7.29874935  | -6.13909234 | 0.05784891  |
| C | 4.92710566  | -4.45909395 | 4.02643976  |
| C | 4.84946958  | -3.70453406 | -2.43645530 |
| C | 2.47782589  | -2.02453567 | 1.53213555  |
| C | 8.11517593  | -6.95061177 | 0.88928364  |
| C | 5.74353225  | -5.27061338 | 4.85787450  |
| C | 3.84834533  | -2.87877471 | -1.86002499 |
| C | 2.66252349  | -2.03877552 | 0.12427043  |
| C | 7.93047834  | -6.93637192 | 2.29714876  |
| C | 6.74465650  | -6.09637273 | 4.28144419  |
| C | 6.66702027  | -5.34181271 | -2.18145072 |
| C | 3.10955497  | -2.82181530 | 3.77143518  |

|   |            |             |             |
|---|------------|-------------|-------------|
| C | 7.48344686 | -6.15333214 | -1.35001598 |
| C | 3.92598156 | -3.63333472 | 4.60286991  |
| H | 3.22165171 | -2.25584786 | -2.49823895 |
| H | 2.03582987 | -1.41584866 | -0.51394352 |
| H | 8.55717196 | -7.55929877 | 2.93536272  |
| H | 7.37135012 | -6.71929958 | 4.91965815  |
| H | 6.80879524 | -5.35274334 | -3.26213598 |
| H | 8.25191551 | -6.78718969 | -1.79248722 |
| H | 2.34108632 | -2.18795775 | 4.21390641  |
| H | 3.78420659 | -3.62240410 | 5.68355518  |
| H | 4.99124440 | -3.71546457 | -3.51714041 |
| H | 8.88364451 | -7.58446927 | 0.44681263  |
| H | 1.70935732 | -1.39067817 | 1.97460656  |
| H | 5.60175743 | -5.25968287 | 5.93855961  |
| K | 0.20465800 | 0.10074000  | 0.48149700  |

109

n = 3, Energy = -299.655875335568 (55.0)

|   |             |             |             |
|---|-------------|-------------|-------------|
| C | -0.83965166 | -2.56852344 | 1.61828503  |
| C | 0.89909277  | -2.69796532 | -0.62350268 |
| C | 0.56666199  | -2.60448661 | 1.81164646  |
| C | -1.37659309 | -2.59728121 | 0.30402974  |
| C | 1.43603421  | -2.66920755 | 0.69075261  |
| C | -0.50722088 | -2.66200215 | -0.81686411 |
| C | -1.70902387 | -2.50380249 | 2.73917888  |
| C | 1.10360343  | -2.57572884 | 3.12590175  |
| C | -2.78290674 | -2.56131804 | 0.11066830  |
| C | 1.76846499  | -2.76268626 | -1.74439653 |

|   |             |             |             |
|---|-------------|-------------|-------------|
| C | 2.84234786  | -2.70517072 | 0.88411405  |
| C | -1.04416231 | -2.69075992 | -2.13111940 |
| C | 0.23423121  | -2.51100789 | 4.24679560  |
| C | -3.65227896 | -2.49659709 | 1.23156215  |
| C | 3.71172007  | -2.76989166 | -0.23677980 |
| C | -0.17479009 | -2.75548087 | -3.25201325 |
| C | -1.17208248 | -2.47504472 | 4.05343422  |
| C | -3.11533756 | -2.46783932 | 2.54581749  |
| C | 3.17477868  | -2.79864944 | -1.55103514 |
| C | 1.23152359  | -2.79144404 | -3.05865186 |
| C | 2.50991689  | -2.61169201 | 3.31926304  |
| C | -3.31984799 | -2.59007581 | -1.20358684 |
| C | 3.37928910  | -2.67641295 | 2.19836919  |
| C | -2.45047577 | -2.65479675 | -2.32448069 |
| H | -1.83941745 | -2.42536456 | 4.91383861  |
| H | -3.78267254 | -2.41815916 | 3.40622188  |
| H | 3.84211366  | -2.84832960 | -2.41143953 |
| H | 1.89885857  | -2.84112420 | -3.91905626 |
| H | 2.92207621  | -2.58961738 | 4.32809289  |
| H | 4.45878348  | -2.70401848 | 2.34679455  |
| H | -4.39934236 | -2.56247028 | -1.35201220 |
| H | -2.86263510 | -2.67687138 | -3.33331054 |
| H | 0.64639031  | -2.48893326 | 5.25562535  |
| H | 4.79121430  | -2.79749720 | -0.08835464 |
| H | -4.73177318 | -2.46899156 | 1.08313699  |
| H | -0.58694919 | -2.77755550 | -4.26084300 |
| C | -0.16858334 | 1.66509884  | -2.18767759 |

|   |             |             |             |
|---|-------------|-------------|-------------|
| C | 0.40421253  | 3.12873530  | 0.17775530  |
| C | 1.17895910  | 1.91650329  | -1.81710338 |
| C | -1.22972785 | 2.14551263  | -1.37553536 |
| C | 1.46535704  | 2.64832152  | -0.63438693 |
| C | -0.94332992 | 2.87733086  | -0.19281892 |
| C | -0.45498127 | 0.93328062  | -3.37039403 |
| C | 2.24010361  | 1.43608951  | -2.62924561 |
| C | -2.57727029 | 1.89410818  | -1.74610957 |
| C | 0.69061046  | 3.86055353  | 1.36047174  |
| C | 2.81289948  | 2.89972596  | -0.26381272 |
| C | -2.00447443 | 3.35774464  | 0.61932331  |
| C | 1.95370568  | 0.70427128  | -3.81196205 |
| C | -2.86366822 | 1.16228995  | -2.92882601 |
| C | 3.09929741  | 3.63154419  | 0.91890372  |
| C | -1.71807649 | 4.08956287  | 1.80203976  |
| C | 0.60616323  | 0.45286680  | -4.18253631 |
| C | -1.80252373 | 0.68187614  | -3.74096829 |
| C | 2.03815291  | 4.11195801  | 1.73104600  |
| C | -0.37053404 | 4.34096734  | 2.17261402  |
| C | 3.58764582  | 1.68749398  | -2.25867135 |
| C | -3.63841457 | 2.37452194  | -0.93396738 |
| C | 3.87404376  | 2.41931220  | -1.07595491 |
| C | -3.35201664 | 3.10634017  | 0.24874906  |
| H | 0.38632257  | -0.10888097 | -5.09039607 |
| H | -2.02236438 | 0.12012837  | -4.64882805 |
| H | 2.25799357  | 4.67370577  | 2.63890576  |
| H | -0.15069338 | 4.90271511  | 3.08047378  |

|   |             |             |             |
|---|-------------|-------------|-------------|
| H | 4.40218641  | 1.31872562  | -2.88207635 |
| H | 4.90842503  | 2.61229168  | -0.79150005 |
| H | -4.67279584 | 2.18154246  | -1.21842225 |
| H | -4.16655723 | 3.47510852  | 0.87215406  |
| H | 2.76824603  | 0.33550292  | -4.43536705 |
| H | 4.13367846  | 3.82452372  | 1.20335868  |
| H | -3.89804927 | 0.96931042  | -3.21328097 |
| H | -2.53261684 | 4.45833123  | 2.42544476  |
| C | 4.11352929  | -1.04453417 | -6.38053581 |
| C | 5.75793362  | -2.40058422 | -4.50366017 |
| C | 3.90227345  | -2.42391720 | -6.11771740 |
| C | 5.14698729  | -0.34317617 | -5.70491640 |
| C | 4.72447562  | -3.10194222 | -5.17927958 |
| C | 5.96918946  | -1.02120120 | -4.76647858 |
| C | 3.29132713  | -0.36650915 | -7.31897363 |
| C | 2.86881545  | -3.12527520 | -6.79333682 |
| C | 5.35824313  | 1.03620685  | -5.96773481 |
| C | 6.58013578  | -3.07860925 | -3.56522235 |
| C | 4.51321978  | -4.48132525 | -4.91646117 |
| C | 7.00264746  | -0.31984320 | -4.09085917 |
| C | 2.04661329  | -2.44725017 | -7.73177464 |
| C | 4.53604097  | 1.71423188  | -6.90617263 |
| C | 5.33542194  | -5.15935027 | -3.97802335 |
| C | 7.82484962  | -0.99786823 | -3.15242135 |
| C | 2.25786909  | -1.06786712 | -7.99459309 |
| C | 3.50258293  | 1.01287391  | -7.58179208 |
| C | 6.36887998  | -4.45799230 | -3.30240390 |

|   |            |             |             |
|---|------------|-------------|-------------|
| C | 7.61359382 | -2.37725128 | -2.88960290 |
| C | 2.65755973 | -4.50465802 | -6.53051837 |
| C | 6.39170102 | 1.73756465  | -5.29211544 |
| C | 3.47976189 | -5.18268305 | -5.59208054 |
| C | 7.21390318 | 1.05953962  | -4.35367762 |
| H | 1.62674211 | -0.54741131 | -8.71494321 |
| H | 2.87145595 | 1.53332971  | -8.30214221 |
| H | 7.00000696 | -4.97844811 | -2.58205378 |
| H | 8.24472080 | -2.89770708 | -2.16925277 |
| H | 1.86427148 | -5.04302444 | -7.04912767 |
| H | 3.31760069 | -6.24150532 | -5.39033965 |
| H | 6.55386222 | 2.79638693  | -5.49385634 |
| H | 8.00719143 | 1.59790604  | -3.83506831 |
| H | 1.25332512 | -2.98561636 | -8.25038394 |
| H | 5.17326089 | -6.21817238 | -3.77628237 |
| H | 4.69820202 | 2.77305398  | -7.10791361 |
| H | 8.61813779 | -0.45950204 | -2.63381204 |
| K | 0.20465800 | 0.10074000  | 0.48149700  |

109

n = 3, Energy = -274.322678445178 (80.3)

|   |            |             |            |
|---|------------|-------------|------------|
| C | 2.93571314 | -4.16233797 | 4.36692695 |
| C | 4.05458915 | -5.13172619 | 1.94329281 |
| C | 2.25152807 | -5.15444041 | 3.61591191 |
| C | 4.17933622 | -3.65492963 | 3.90612493 |
| C | 2.81096607 | -5.63913452 | 2.40409483 |
| C | 4.73877422 | -4.13962375 | 2.69430786 |
| C | 2.37627514 | -3.67764385 | 5.57874403 |

|   |             |             |             |
|---|-------------|-------------|-------------|
| C | 1.00790499  | -5.66184874 | 4.07671393  |
| C | 4.86352129  | -2.66282719 | 4.65713998  |
| C | 4.61402716  | -5.61642030 | 0.73147574  |
| C | 2.12678100  | -6.63123697 | 1.65307979  |
| C | 5.98239730  | -3.63221541 | 2.23350584  |
| C | 0.44846699  | -5.17715463 | 5.28853100  |
| C | 4.30408329  | -2.17813308 | 5.86895705  |
| C | 2.68621901  | -7.11593108 | 0.44126271  |
| C | 6.54183530  | -4.11690953 | 1.02168877  |
| C | 1.13265204  | -4.18505216 | 6.03954610  |
| C | 3.06046019  | -2.68554139 | 6.32975913  |
| C | 3.92984211  | -6.60852277 | -0.01953936 |
| C | 5.85765026  | -5.10901199 | 0.27067367  |
| C | 0.32372011  | -6.65395104 | 3.32569891  |
| C | 6.10714418  | -2.15541900 | 4.19633793  |
| C | 0.88315811  | -7.13864515 | 2.11388184  |
| C | 6.66658219  | -2.64011312 | 2.98452086  |
| H | 0.70322430  | -3.81299825 | 6.96974367  |
| H | 2.63103244  | -2.31348748 | 7.25995669  |
| H | 4.35926985  | -6.98057668 | -0.94973693 |
| H | 6.28707800  | -5.48106591 | -0.65952390 |
| H | -0.63089206 | -7.04344058 | 3.67941316  |
| H | 0.35797373  | -7.90018865 | 1.53739842  |
| H | 6.63232856  | -1.39387551 | 4.77282135  |
| H | 7.62119435  | -2.25062357 | 2.63080661  |
| H | -0.50614501 | -5.56664401 | 5.64224533  |
| H | 2.16103484  | -7.87747445 | -0.13522073 |



|   |             |             |             |
|---|-------------|-------------|-------------|
| H | 4.82926746  | -1.41658971 | 6.44544050  |
| H | 7.49644731  | -3.72742015 | 0.66797444  |
| C | 0.47571109  | -1.87121788 | 2.85277653  |
| C | 2.55501593  | -1.84098020 | 0.91856438  |
| C | 1.58873148  | -1.00547482 | 3.02033149  |
| C | 0.40234313  | -2.72184209 | 1.71811549  |
| C | 2.62838389  | -0.99035598 | 2.05322542  |
| C | 1.44199554  | -2.70672325 | 0.75100942  |
| C | -0.56394132 | -1.88633671 | 3.81988260  |
| C | 1.66209945  | -0.15485061 | 4.15499252  |
| C | -0.71067726 | -3.58758514 | 1.55056053  |
| C | 3.59466834  | -1.82586136 | -0.04854169 |
| C | 3.74140428  | -0.12461293 | 2.22078038  |
| C | 1.36862757  | -3.55734747 | -0.38365161 |
| C | 0.62244703  | -0.16996945 | 5.12209860  |
| C | -1.75032967 | -3.60270398 | 2.51766660  |
| C | 4.78105669  | -0.10949409 | 1.25367431  |
| C | 2.40827999  | -3.54222863 | -1.35075768 |
| C | -0.49057340 | -1.03571250 | 4.95454367  |
| C | -1.67696175 | -2.75207977 | 3.65232768  |
| C | 4.70768877  | -0.96011831 | 0.11901324  |
| C | 3.52130042  | -2.67648557 | -1.18320276 |
| C | 2.77511972  | 0.71089228  | 4.32254736  |
| C | -0.78404511 | -4.43820919 | 0.41589962  |
| C | 3.81477213  | 0.72601112  | 3.35544129  |
| C | 0.25560730  | -4.42309035 | -0.55120645 |
| H | -1.28861641 | -1.04731781 | 5.69689971  |

|   |             |             |             |
|---|-------------|-------------|-------------|
| H | -2.47500476 | -2.76368507 | 4.39468371  |
| H | 5.50573178  | -0.94851300 | -0.62334280 |
| H | 4.31934343  | -2.66488027 | -1.92555879 |
| H | 2.83143740  | 1.36383629  | 5.19351964  |
| H | 4.66913292  | 1.39056043  | 3.48405745  |
| H | -1.63840590 | -5.10275851 | 0.28728346  |
| H | 0.19928962  | -5.07603436 | -1.42217873 |
| H | 0.67876456  | 0.48297439  | 5.99307079  |
| H | 5.63541741  | 0.55505506  | 1.38229031  |
| H | -2.60469039 | -4.26725313 | 2.38905061  |
| H | 2.35196246  | -4.19517247 | -2.22172987 |
| C | 3.40462432  | -7.22848609 | 6.67266073  |
| C | 5.89327941  | -6.21577020 | 5.75255101  |
| C | 3.96547139  | -7.71528092 | 5.46233787  |
| C | 4.08810480  | -6.23533331 | 7.42292873  |
| C | 5.20979893  | -7.20892298 | 5.00228301  |
| C | 5.33243234  | -5.72897537 | 6.96287387  |
| C | 2.16029678  | -7.73484404 | 7.13271559  |
| C | 3.28199092  | -8.70843370 | 4.71206986  |
| C | 3.52725773  | -5.74853848 | 8.63325160  |
| C | 7.13760695  | -5.70941225 | 5.29249615  |
| C | 5.77064600  | -7.69571781 | 3.79196014  |
| C | 6.01591281  | -4.73582259 | 7.71314187  |
| C | 2.03766338  | -9.21479165 | 5.17212473  |
| C | 2.28293019  | -6.25489643 | 9.09330646  |
| C | 7.01497354  | -7.18935986 | 3.33190528  |
| C | 7.26024036  | -4.22946464 | 7.25308701  |

|   |            |             |             |
|---|------------|-------------|-------------|
| C | 1.47681626 | -8.72799684 | 6.38244761  |
| C | 1.59944966 | -7.24804923 | 8.34303848  |
| C | 7.69845407 | -6.19620706 | 4.08217326  |
| C | 7.82108748 | -4.71625945 | 6.04276413  |
| C | 3.84283800 | -9.19522839 | 3.50174719  |
| C | 4.21073819 | -4.75538584 | 9.38351941  |
| C | 5.08716554 | -8.68887045 | 3.04169233  |
| C | 5.45506573 | -4.24902790 | 8.92346455  |
| H | 0.52166347 | -9.11668004 | 6.73558830  |
| H | 0.64429688 | -7.63673242 | 8.69617916  |
| H | 8.65360685 | -5.80752387 | 3.72903258  |
| H | 8.77624026 | -4.32757625 | 5.68962344  |
| H | 3.31819450 | -9.95757813 | 2.92583718  |
| H | 5.51767493 | -9.06253695 | 2.11264159  |
| H | 3.78022880 | -4.38171934 | 10.31257014 |
| H | 5.97970923 | -3.48667816 | 9.49937456  |
| H | 1.51301984 | -9.97714127 | 4.59621493  |
| H | 7.44548300 | -7.56302620 | 2.40285471  |
| H | 1.85242073 | -5.88123009 | 10.02235702 |
| H | 7.78488389 | -3.46711502 | 7.82899681  |
| K | 0.20465800 | 0.10074000  | 0.48149700  |

145

n = 4, Energy = -431.554716652857 (24.2)

|   |             |             |            |
|---|-------------|-------------|------------|
| C | 0.51094066  | -5.15112541 | 4.11200868 |
| C | 2.12467121  | -6.31801363 | 2.08720125 |
| C | 1.90227846  | -5.33308005 | 4.32988873 |
| C | -0.07353186 | -5.55261488 | 2.88172491 |

|   |             |             |             |
|---|-------------|-------------|-------------|
| C | 2.70914373  | -5.91652416 | 3.31748502  |
| C | 0.73333341  | -6.13605899 | 1.86932120  |
| C | -0.29592461 | -4.56768130 | 5.12441239  |
| C | 2.48675098  | -4.93159058 | 5.56017250  |
| C | -1.46486966 | -5.37066023 | 2.66384486  |
| C | 2.93153648  | -6.90145774 | 1.07479754  |
| C | 4.10048153  | -6.09847880 | 3.53536508  |
| C | 0.14886088  | -6.53754846 | 0.63903743  |
| C | 1.67988571  | -4.34814647 | 6.57257622  |
| C | -2.27173493 | -4.78721612 | 3.67624857  |
| C | 4.90734680  | -6.68192291 | 2.52296136  |
| C | 0.95572616  | -7.12099257 | -0.37336628 |
| C | 0.28854788  | -4.16619180 | 6.35469620  |
| C | -1.68726244 | -4.38572663 | 4.90653238  |
| C | 4.32287431  | -7.08341241 | 1.29267755  |
| C | 2.34706399  | -7.30294723 | -0.15548627 |
| C | 3.87808859  | -5.11354524 | 5.77805242  |
| C | -2.04934199 | -5.77214968 | 1.43356123  |
| C | 4.68495386  | -5.69698935 | 4.76564870  |
| C | -1.24247672 | -6.35559379 | 0.42115752  |
| H | -0.33080642 | -3.71833684 | 7.13182296  |
| H | -2.30661674 | -3.93787166 | 5.68365914  |
| H | 4.94222861  | -7.53126737 | 0.51555079  |
| H | 2.96641829  | -7.75080220 | -0.93261303 |
| H | 4.32673305  | -4.80535964 | 6.72242525  |
| H | 5.75295269  | -5.83665877 | 4.93289469  |
| H | -3.11734082 | -5.63248027 | 1.26631524  |

|   |             |             |             |
|---|-------------|-------------|-------------|
| H | -1.69112118 | -6.66377939 | -0.52321532 |
| H | 2.12852995  | -4.03996086 | 7.51694895  |
| H | 5.97534547  | -6.82159237 | 2.69020717  |
| H | -3.33973360 | -4.64754666 | 3.50900276  |
| H | 0.50708192  | -7.42917817 | -1.31773902 |
| C | 3.77794560  | 1.52296957  | 1.11583894  |
| C | 3.05946149  | 1.11097187  | -1.60070998 |
| C | 4.61193922  | 0.74358703  | 0.27119844  |
| C | 2.58470992  | 2.09635326  | 0.60220498  |
| C | 4.25269717  | 0.53758818  | -1.08707602 |
| C | 2.22546787  | 1.89035441  | -0.75606948 |
| C | 4.13718765  | 1.72896842  | 2.47411339  |
| C | 5.80517489  | 0.17020334  | 0.78483240  |
| C | 1.75071630  | 2.87573580  | 1.44684548  |
| C | 2.70021944  | 0.90497303  | -2.95898443 |
| C | 5.08669079  | -0.24179436 | -1.93171652 |
| C | 1.03223220  | 2.46373811  | -1.26970344 |
| C | 6.16441695  | 0.37620218  | 2.14310685  |
| C | 2.10995835  | 3.08173465  | 2.80511993  |
| C | 4.72744874  | -0.44779321 | -3.28999097 |
| C | 0.67299014  | 2.25773926  | -2.62797789 |
| C | 5.33042334  | 1.15558473  | 2.98774741  |
| C | 3.30319404  | 2.50835097  | 3.31875395  |
| C | 3.53421305  | 0.12559048  | -3.80362499 |
| C | 1.50698375  | 1.47835671  | -3.47261845 |
| C | 6.63916832  | -0.60917907 | -0.05980807 |
| C | 0.55748082  | 3.44911936  | 0.93321149  |

|   |             |             |             |
|---|-------------|-------------|-------------|
| C | 6.27992627  | -0.81517792 | -1.41808253 |
| C | 0.19823877  | 3.24312051  | -0.42506297 |
| H | 5.60617955  | 1.31371060  | 4.03036648  |
| H | 3.57895025  | 2.66647683  | 4.36137302  |
| H | 3.25845684  | -0.03253539 | -4.84624406 |
| H | 1.23122754  | 1.32023084  | -4.51523752 |
| H | 7.55510283  | -1.04931167 | 0.33446027  |
| H | 6.92010454  | -1.41343640 | -2.06643338 |
| H | -0.08269745 | 4.04737785  | 1.58156234  |
| H | -0.71769574 | 3.68325311  | -0.81933131 |
| H | 7.08035128  | -0.06393028 | 2.53737528  |
| H | 5.36762680  | -1.04605157 | -3.93834185 |
| H | 1.46978029  | 3.67999301  | 3.45347081  |
| H | -0.24294419 | 2.69787172  | -3.02224632 |
| C | 5.15418992  | -2.49066689 | 3.44253165  |
| C | 3.97187958  | -3.24561266 | 0.97315953  |
| C | 5.94898201  | -3.08576627 | 2.42736548  |
| C | 3.76824267  | -2.27304039 | 3.22301175  |
| C | 5.35782683  | -3.46323916 | 1.19267942  |
| C | 3.17708749  | -2.65051327 | 1.98832570  |
| C | 5.74534510  | -2.11319401 | 4.67721770  |
| C | 7.33492926  | -3.30339277 | 2.64688537  |
| C | 2.97345058  | -1.67794101 | 4.23817792  |
| C | 3.38072440  | -3.62308554 | -0.26152653 |
| C | 6.15261892  | -4.05833854 | 0.17751326  |
| C | 1.79114024  | -2.43288677 | 1.76880580  |
| C | 7.92608444  | -2.92591989 | 3.88157143  |

|   |             |             |             |
|---|-------------|-------------|-------------|
| C | 3.56460576  | -1.30046812 | 5.47286398  |
| C | 5.56146374  | -4.43581142 | -1.05717280 |
| C | 1.19998506  | -2.81035965 | 0.53411974  |
| C | 7.13129238  | -2.33082049 | 4.89673765  |
| C | 4.95055304  | -1.51809461 | 5.69238392  |
| C | 4.17551646  | -4.21818494 | -1.27669275 |
| C | 1.99477712  | -3.40545905 | -0.48104647 |
| C | 8.12972114  | -3.89849208 | 1.63171928  |
| C | 1.58750354  | -1.46031458 | 4.01865795  |
| C | 7.53856596  | -4.27596496 | 0.39703323  |
| C | 0.99634836  | -1.83778747 | 2.78397189  |
| H | 7.58506640  | -2.04107019 | 5.84448958  |
| H | 5.40432706  | -1.22834431 | 6.64013585  |
| H | 3.72174244  | -4.50793523 | -2.22444467 |
| H | 1.54100310  | -3.69520935 | -1.42879840 |
| H | 9.19358216  | -4.06554343 | 1.80022399  |
| H | 8.14865292  | -4.73276664 | -0.38221410 |
| H | 0.97741658  | -1.00351290 | 4.79790528  |
| H | -0.06751266 | -1.67073612 | 2.61546719  |
| H | 8.98994527  | -3.09297115 | 4.05007626  |
| H | 6.17155046  | -4.89261304 | -1.83642010 |
| H | 2.95451904  | -0.84366651 | 6.25211128  |
| H | 0.13612423  | -2.64330840 | 0.36561491  |
| C | -3.05231120 | 2.34380372  | -1.67287579 |
| C | -2.62854664 | -0.29805384 | -0.72071418 |
| C | -3.08921229 | 2.07714008  | -0.27862729 |
| C | -2.80352782 | 1.28953858  | -2.59104349 |

|   |             |             |             |
|---|-------------|-------------|-------------|
| C | -2.87733001 | 0.75621130  | 0.19745352  |
| C | -2.59164554 | -0.03139020 | -2.11496268 |
| C | -3.26419348 | 3.66473250  | -2.14895659 |
| C | -3.33799567 | 3.13140522  | 0.63954041  |
| C | -2.76662673 | 1.55620222  | -3.98529199 |
| C | -2.41666435 | -1.61898262 | -0.24463337 |
| C | -2.91423110 | 0.48954766  | 1.59170202  |
| C | -2.34286217 | -1.08565534 | -3.03313038 |
| C | -3.54987795 | 4.45233400  | 0.16345961  |
| C | -2.97850901 | 2.87713100  | -4.46137280 |
| C | -2.70234882 | -0.83138112 | 2.06778283  |
| C | -2.13097989 | -2.40658412 | -2.55704957 |
| C | -3.51297686 | 4.71899770  | -1.23078892 |
| C | -3.22729240 | 3.93139620  | -3.54320512 |
| C | -2.45356544 | -1.88564632 | 1.14961515  |
| C | -2.16788097 | -2.67324782 | -1.16280105 |
| C | -3.37489673 | 2.86474150  | 2.03378869  |
| C | -2.51784339 | 0.50193715  | -4.90345946 |
| C | -3.16301445 | 1.54381272  | 2.50986950  |
| C | -2.30596110 | -0.81899163 | -4.42737866 |
| H | -3.67561889 | 5.73295002  | -1.59623121 |
| H | -3.38993442 | 4.94534852  | -3.90864741 |
| H | -2.29092341 | -2.89959864 | 1.51505744  |
| H | -2.00523895 | -3.68720014 | -0.79735876 |
| H | -3.56586427 | 3.67400143  | 2.73857947  |
| H | -3.19133994 | 1.33912021  | 3.58010260  |
| H | -2.48951789 | 0.70662967  | -5.97369257 |



|   |             |             |             |
|---|-------------|-------------|-------------|
| H | -2.11499357 | -1.62825155 | -5.13216944 |
| H | -3.74084546 | 5.26159390  | 0.86825014  |
| H | -2.73067428 | -1.03607377 | 3.13801573  |
| H | -2.95018356 | 3.08182364  | -5.53160570 |
| H | -1.94001237 | -3.21584403 | -3.26184011 |
| K | 0.20465800  | 0.10074000  | 0.48149700  |

145

n = 4, Energy = -421.998077265752 (33.8)

|   |             |            |             |
|---|-------------|------------|-------------|
| C | -4.50479882 | 4.76931234 | 0.49363182  |
| C | -1.99060025 | 6.08346514 | 0.62556920  |
| C | -3.79613626 | 5.06774569 | -0.70015836 |
| C | -3.95636210 | 5.12795539 | 1.75339069  |
| C | -2.53903698 | 5.72482209 | -0.63418967 |
| C | -2.69926281 | 5.78503178 | 1.81935937  |
| C | -5.76189811 | 4.11223594 | 0.42766313  |
| C | -4.34457299 | 4.70910265 | -1.95991722 |
| C | -4.66502466 | 4.82952203 | 2.94718086  |
| C | -0.73350096 | 6.74054153 | 0.69153789  |
| C | -1.83037442 | 6.02325544 | -1.82797984 |
| C | -2.15082608 | 6.14367483 | 3.07911824  |
| C | -5.60167228 | 4.05202625 | -2.02588591 |
| C | -5.92212394 | 4.17244564 | 2.88121217  |
| C | -0.57327513 | 6.68033184 | -1.76201116 |
| C | -0.89372680 | 6.80075123 | 3.14508693  |
| C | -6.31033489 | 3.75359287 | -0.83209574 |
| C | -6.47056072 | 3.81380256 | 1.62145331  |
| C | -0.02483835 | 7.03897491 | -0.50225229 |

|   |             |            |             |
|---|-------------|------------|-------------|
| C | -0.18506418 | 7.09918461 | 1.95129675  |
| C | -3.63591044 | 5.00753600 | -3.15370716 |
| C | -4.11658791 | 5.18816508 | 4.20693949  |
| C | -2.37881116 | 5.66461240 | -3.08773847 |
| C | -2.85948863 | 5.84524147 | 4.27290818  |
| H | -7.27529134 | 3.24921735 | -0.88273367 |
| H | -7.43551717 | 3.30942704 | 1.57081537  |
| H | 0.94011810  | 7.54335043 | -0.45161435 |
| H | 0.77989227  | 7.60356013 | 2.00193469  |
| H | -4.05689359 | 4.73223956 | -4.12070526 |
| H | -1.83483775 | 5.89369154 | -4.00409863 |
| H | -4.66056132 | 4.95908594 | 5.12329965  |
| H | -2.43850548 | 6.12053791 | 5.23990628  |
| H | -6.02265549 | 3.77672979 | -2.99288377 |
| H | -0.02930168 | 6.90941101 | -2.67837108 |
| H | -6.46609739 | 3.94336647 | 3.79757209  |
| H | -0.47274358 | 7.07604769 | 4.11208479  |
| C | -0.91472757 | 2.47578505 | -1.10611618 |
| C | -1.10255351 | 2.55284109 | 1.72661807  |
| C | -2.05223760 | 1.92958263 | -0.45486053 |
| C | 0.12886949  | 3.06051549 | -0.34100471 |
| C | -2.14615057 | 1.96811065 | 0.96150660  |
| C | 0.03495652  | 3.09904351 | 1.07536241  |
| C | -0.82081461 | 2.43725703 | -2.52248330 |
| C | -3.09583467 | 1.34485219 | -1.21997199 |
| C | 1.26637952  | 3.60671791 | -0.99226036 |
| C | -1.19646648 | 2.59136911 | 3.14298519  |

|   |             |             |             |
|---|-------------|-------------|-------------|
| C | -3.28366060 | 1.42190823  | 1.61276225  |
| C | 1.07855358  | 3.68377395  | 1.84047388  |
| C | -3.00192170 | 1.30632417  | -2.63633912 |
| C | 1.36029248  | 3.56818989  | -2.40862748 |
| C | -3.37757357 | 1.46043625  | 3.02912937  |
| C | 0.98464062  | 3.72230197  | 3.25684100  |
| C | -1.86441167 | 1.85252658  | -3.28759483 |
| C | 0.31669543  | 2.98345944  | -3.17373901 |
| C | -2.33397651 | 2.04516669  | 3.79424090  |
| C | -0.15286942 | 3.17609955  | 3.90809672  |
| C | -4.23334448 | 0.79864988  | -0.56871633 |
| C | 2.30997637  | 4.19144824  | -0.22714891 |
| C | -4.32725745 | 0.83717790  | 0.84765079  |
| C | 2.21606340  | 4.22997626  | 1.18921822  |
| H | -1.79232355 | 1.82295226  | -4.37480616 |
| H | 0.38878354  | 2.95388512  | -4.26095034 |
| H | -2.40606463 | 2.07474101  | 4.88145223  |
| H | -0.22495754 | 3.20567387  | 4.99530805  |
| H | -5.03441555 | 0.34980745  | -1.15602024 |
| H | -5.20041665 | 0.41790980  | 1.34755833  |
| H | 3.18313556  | 4.61071634  | -0.72705644 |
| H | 3.01713447  | 4.67881868  | 1.77652213  |
| H | -3.80299255 | 0.85748185  | -3.22364308 |
| H | -4.25073255 | 1.04116826  | 3.52903698  |
| H | 2.23345147  | 3.98745787  | -2.90853509 |
| H | 1.78571147  | 4.17114429  | 3.84414496  |
| C | -0.65627106 | -6.06393579 | 2.10342138  |

|   |             |             |             |
|---|-------------|-------------|-------------|
| C | 1.00156602  | -5.21012520 | 4.24542587  |
| C | -1.23721840 | -5.67511812 | 3.33943153  |
| C | 0.75359482  | -6.02584816 | 1.93841347  |
| C | -0.40829986 | -5.24821283 | 4.41043377  |
| C | 1.58251336  | -5.59894286 | 3.00941572  |
| C | -1.48518959 | -6.49084108 | 1.03241913  |
| C | -2.64708428 | -5.71320575 | 3.50443943  |
| C | 1.33454217  | -6.41466582 | 0.70240333  |
| C | 1.83048456  | -4.78321991 | 5.31642811  |
| C | -0.98924720 | -4.85939517 | 5.64644392  |
| C | 2.99237924  | -5.56085523 | 2.84440781  |
| C | -3.47600282 | -6.14011105 | 2.43343719  |
| C | 0.50562363  | -6.84157111 | -0.36859892 |
| C | -0.16032867 | -4.43248988 | 6.71744616  |
| C | 3.82129778  | -5.13394994 | 3.91541006  |
| C | -2.89505551 | -6.52892873 | 1.19742699  |
| C | -0.90424229 | -6.87965876 | -0.20359106 |
| C | 1.24953725  | -4.39440223 | 6.55243830  |
| C | 3.24035047  | -4.74513226 | 5.15142025  |
| C | -3.22803143 | -5.32438812 | 4.74044944  |
| C | 2.74440785  | -6.37657816 | 0.53739556  |
| C | -2.39911289 | -4.89748283 | 5.81145169  |
| C | 3.57332639  | -5.94967286 | 1.60839780  |
| H | -3.53133802 | -6.85662362 | 0.37531968  |
| H | -1.54052479 | -7.20735365 | -1.02569838 |
| H | 1.88581976  | -4.06670734 | 7.37454562  |
| H | 3.87663298  | -4.41743737 | 5.97352757  |

|   |             |             |             |
|---|-------------|-------------|-------------|
| H | -4.31025252 | -5.35362440 | 4.86711047  |
| H | -2.84505140 | -4.59902418 | 6.76022012  |
| H | 3.19034637  | -6.67503681 | -0.41137287 |
| H | 4.65554748  | -5.92043659 | 1.48173678  |
| H | -4.55822375 | -6.16934737 | 2.56009803  |
| H | -0.60626695 | -4.13403124 | 7.66621451  |
| H | 0.95156191  | -7.14002975 | -1.31736726 |
| H | 4.90351871  | -5.10471361 | 3.78874921  |
| C | -2.04206064 | -1.77461263 | 3.76994776  |
| C | -0.82024997 | -2.55921600 | 1.32921513  |
| C | -0.62863608 | -1.73614403 | 3.63898492  |
| C | -2.84457986 | -2.20538292 | 2.68054428  |
| C | -0.01773075 | -2.12844572 | 2.41861860  |
| C | -2.23367453 | -2.59768460 | 1.46017797  |
| C | -2.65296597 | -1.38231094 | 4.99031407  |
| C | 0.17388315  | -1.30537374 | 4.72838839  |
| C | -4.25800442 | -2.24385152 | 2.81150712  |
| C | -0.20934464 | -2.95151769 | 0.10884882  |
| C | 1.39569381  | -2.08997712 | 2.28765576  |
| C | -3.03619376 | -3.02845489 | 0.37077450  |
| C | -0.43702219 | -0.91307205 | 5.94875470  |
| C | -4.86890975 | -1.85154983 | 4.03187344  |
| C | 2.00659914  | -2.48227880 | 1.06728945  |
| C | -2.42528843 | -3.42075658 | -0.84959182 |
| C | -1.85044677 | -0.95154064 | 6.07971760  |
| C | -4.06639055 | -1.42077953 | 5.12127696  |
| C | 1.20407994  | -2.91304911 | -0.02211408 |

|   |             |             |             |
|---|-------------|-------------|-------------|
| C | -1.01186384 | -3.38228800 | -0.98055471 |
| C | 1.58730749  | -1.26690519 | 4.59742546  |
| C | -5.06052343 | -2.67462176 | 1.72210374  |
| C | 2.19821282  | -1.65920687 | 3.37705914  |
| C | -4.44961810 | -3.06692345 | 0.50173743  |
| H | -2.31938112 | -0.65040767 | 7.01647761  |
| H | -4.53532490 | -1.11964656 | 6.05803698  |
| H | 1.67301429  | -3.21418208 | -0.95887409 |
| H | -0.54292949 | -3.68342097 | -1.91731472 |
| H | 2.20332584  | -0.93624346 | 5.43365777  |
| H | 3.28316557  | -1.62967815 | 3.27653134  |
| H | -6.14547618 | -2.70415048 | 1.82263155  |
| H | -5.06563645 | -3.39758517 | -0.33449488 |
| H | 0.17899592  | -0.58241036 | 6.78498697  |
| H | 3.09155170  | -2.45275014 | 0.96676150  |
| H | -5.95386231 | -1.88107849 | 4.13240139  |
| H | -3.04130654 | -3.75141828 | -1.68582409 |
| K | 0.20465800  | 0.10074000  | 0.48149700  |

145

n = 4, Energy = -409.646162080289 (46.1)

|   |            |             |             |
|---|------------|-------------|-------------|
| C | 2.43227404 | -9.26931579 | -2.10934854 |
| C | 3.18291107 | -9.47029787 | 0.62227181  |
| C | 3.76443440 | -8.97486734 | -1.71558598 |
| C | 1.47543219 | -9.66425528 | -1.13730093 |
| C | 4.13975292 | -9.07535837 | -0.34977580 |
| C | 1.85075071 | -9.76474632 | 0.22850925  |
| C | 2.05695552 | -9.16882475 | -3.47515872 |

|   |             |              |             |
|---|-------------|--------------|-------------|
| C | 4.72127624  | -8.57992784  | -2.68763359 |
| C | 0.14327183  | -9.95870374  | -1.53106349 |
| C | 3.55822959  | -9.57078891  | 1.98808199  |
| C | 5.47191328  | -8.78090992  | 0.04398676  |
| C | 0.89390887  | -10.15968582 | 1.20055686  |
| C | 4.34595772  | -8.47943680  | -4.05344377 |
| C | -0.23204668 | -9.85821270  | -2.89687367 |
| C | 5.84723180  | -8.88140096  | 1.40979694  |
| C | 1.26922739  | -10.26017685 | 2.56636704  |
| C | 3.01379735  | -8.77388525  | -4.44720639 |
| C | 0.72479514  | -9.46327320  | -3.86892134 |
| C | 4.89038997  | -9.27634045  | 2.38184461  |
| C | 2.60138777  | -9.96572840  | 2.96012966  |
| C | 6.05343638  | -8.28547945  | -2.29387097 |
| C | -0.81356979 | -10.35364317 | -0.55901594 |
| C | 6.42875490  | -8.38597049  | -0.92806079 |
| C | -0.43825127 | -10.45413420 | 0.80679424  |
| H | 2.72570075  | -8.69674777  | -5.49560992 |
| H | 0.43669855  | -9.38613572  | -4.91732488 |
| H | 5.17848656  | -9.35347794  | 3.43024815  |
| H | 2.88948436  | -10.04286589 | 4.00853319  |
| H | 6.78791365  | -7.98232164  | -3.04002025 |
| H | 7.45132879  | -8.15995017  | -0.62580642 |
| H | -1.83614368 | -10.57966348 | -0.86127031 |
| H | -1.17272854 | -10.75729201 | 1.55294352  |
| H | 5.08043475  | -8.17627906  | -4.79959305 |
| H | 6.86980549  | -8.65538071  | 1.71205142  |

|   |             |              |             |
|---|-------------|--------------|-------------|
| H | -1.25462037 | -10.08423295 | -3.19912816 |
| H | 0.53475036  | -10.56333460 | 3.31251632  |
| C | -1.31615683 | 1.10442702   | -3.54467220 |
| C | -1.81491199 | 1.85382275   | -0.85111529 |
| C | -2.53696609 | 0.73637206   | -2.91972391 |
| C | -0.34472515 | 1.84717985   | -2.82284203 |
| C | -2.78634367 | 1.11106992   | -1.57294546 |
| C | -0.59410273 | 2.22187772   | -1.47606358 |
| C | -1.06677925 | 0.72972916   | -4.89145066 |
| C | -3.50839778 | -0.00638078  | -3.64155408 |
| C | 0.87608411  | 2.21523482   | -3.44779032 |
| C | -2.06428957 | 2.22852061   | 0.49566317  |
| C | -4.00715293 | 0.74301495   | -0.94799717 |
| C | 0.37732896  | 2.96463055   | -0.75423341 |
| C | -3.25902020 | -0.38107864  | -4.98833254 |
| C | 1.12546169  | 1.84053696   | -4.79456878 |
| C | -4.25653051 | 1.11771281   | 0.39878129  |
| C | 0.12795138  | 3.33932841   | 0.59254505  |
| C | -2.03821093 | -0.01302369  | -5.61328088 |
| C | 0.15403002  | 1.09778411   | -5.51639900 |
| C | -3.28509884 | 1.86046566   | 1.12061151  |
| C | -1.09285789 | 2.97127346   | 1.21749339  |
| C | -4.72920683 | -0.37443564  | -3.01660578 |
| C | 1.84751558  | 2.95798755   | -2.72596016 |
| C | -4.97858440 | 0.00026223   | -1.66982733 |
| C | 1.59813801  | 3.33268541   | -1.37918171 |
| H | -1.84678730 | -0.30064386  | -6.64707557 |



|   |             |             |             |
|---|-------------|-------------|-------------|
| H | 0.34545364  | 0.81016394  | -6.55019369 |
| H | -3.47652246 | 2.14808584  | 2.15440620  |
| H | -1.28428152 | 3.25889364  | 2.25128808  |
| H | -5.47488334 | -0.94457695 | -3.57068672 |
| H | -5.91568456 | -0.28225887 | -1.19011347 |
| H | 2.78461574  | 3.24050865  | -3.20567402 |
| H | 2.34381452  | 3.90282672  | -0.82510077 |
| H | -4.00469649 | -0.95121986 | -5.54241353 |
| H | -5.19363047 | 0.83519184  | 0.87849521  |
| H | 2.06256165  | 2.12305794  | -5.27428270 |
| H | 0.87362767  | 3.90946963  | 1.14662604  |
| C | 0.52768543  | -2.38814062 | -1.23136774 |
| C | 1.28174819  | -2.58538657 | 1.49958134  |
| C | -0.42771591 | -2.78258225 | -0.25770241 |
| C | 1.86011814  | -2.09232196 | -0.83955853 |
| C | -0.05068452 | -2.88120522 | 1.10777213  |
| C | 2.23714953  | -2.19094494 | 0.52591601  |
| C | 0.15065404  | -2.28951764 | -2.59684228 |
| C | -1.76014862 | -3.07840090 | -0.64951163 |
| C | 2.81551947  | -1.69788033 | -1.81322386 |
| C | 1.65877958  | -2.68400955 | 2.86505588  |
| C | -1.00608585 | -3.27564686 | 2.08143746  |
| C | 3.56958224  | -1.89512629 | 0.91772522  |
| C | -2.13718000 | -2.97977793 | -2.01498617 |
| C | 2.43848809  | -1.59925736 | -3.17869840 |
| C | -0.62905447 | -3.37426983 | 3.44691200  |
| C | 3.94661362  | -1.99374926 | 2.28319977  |

|   |             |             |             |
|---|-------------|-------------|-------------|
| C | -1.18177869 | -2.58533629 | -2.98865155 |
| C | 1.10605536  | -1.89507601 | -3.57050767 |
| C | 0.70337826  | -3.07845118 | 3.83872127  |
| C | 2.99121231  | -2.38819090 | 3.25686515  |
| C | -2.71554973 | -3.47284247 | 0.32415365  |
| C | 4.14795197  | -1.40206175 | -1.42141459 |
| C | -2.33851835 | -3.57146544 | 1.68962819  |
| C | 4.52498335  | -1.50068472 | -0.05594005 |
| H | -1.47119009 | -2.50963274 | -4.03679745 |
| H | 0.81664396  | -1.81937246 | -4.61865357 |
| H | 0.99278966  | -3.15415473 | 4.88686717  |
| H | 3.28062371  | -2.46389444 | 4.30501105  |
| H | -3.73833269 | -3.69991456 | 0.02339868  |
| H | -3.07188987 | -3.87424109 | 2.43701923  |
| H | 4.88132349  | -1.09928610 | -2.16880564 |
| H | 5.54776631  | -1.27361263 | 0.24481492  |
| H | -3.15996276 | -3.20684995 | -2.31574125 |
| H | -1.36242576 | -3.67704542 | 4.19430304  |
| H | 3.17185938  | -1.29648177 | -3.92608945 |
| H | 4.96939638  | -1.76667724 | 2.58395485  |
| C | 1.80337894  | -5.60022636 | -2.51716347 |
| C | 1.13590638  | -6.17509074 | 0.18276446  |
| C | 0.48217994  | -5.99805854 | -2.18165960 |
| C | 2.79084166  | -5.48982637 | -1.50270337 |
| C | 0.14844366  | -6.28549073 | -0.83169564 |
| C | 2.45710538  | -5.77725856 | -0.15273940 |
| C | 2.13711522  | -5.31279417 | -3.86712743 |

|   |             |             |             |
|---|-------------|-------------|-------------|
| C | -0.50528278 | -6.10845853 | -3.19611971 |
| C | 4.11204065  | -5.09199419 | -1.83820723 |
| C | 0.80217010  | -6.46252293 | 1.53272843  |
| C | -1.17275533 | -6.68332291 | -0.49619177 |
| C | 3.44456810  | -5.66685857 | 0.86172070  |
| C | -0.17154650 | -5.82102634 | -4.54608367 |
| C | 4.44577693  | -4.80456200 | -3.18817120 |
| C | -1.50649161 | -6.97075510 | 0.85377219  |
| C | 3.11083182  | -5.95429076 | 2.21168467  |
| C | 1.14965251  | -5.42319415 | -4.88158759 |
| C | 3.45831423  | -4.91496198 | -4.20263136 |
| C | -0.51902891 | -6.86035512 | 1.86823235  |
| C | 1.78963281  | -6.35212295 | 2.54718859  |
| C | -1.82648155 | -6.50629066 | -2.86061578 |
| C | 5.09950315  | -4.98159425 | -0.82374720 |
| C | -2.16021783 | -6.79372285 | -1.51065181 |
| C | 4.76576687  | -5.26902644 | 0.52621677  |
| H | 1.40583035  | -5.20255959 | -5.91782749 |
| H | 3.71449206  | -4.69432742 | -5.23887125 |
| H | -0.77520674 | -7.08098968 | 2.90447225  |
| H | 1.53345497  | -6.57275751 | 3.58342849  |
| H | -2.58446358 | -6.59103433 | -3.63932112 |
| H | -3.17437772 | -7.09910110 | -1.25311715 |
| H | 6.11366304  | -4.67621600 | -1.08128186 |
| H | 5.52374890  | -5.18428277 | 1.30492212  |
| H | -0.92952829 | -5.90576995 | -5.32478901 |
| H | -2.52065129 | -7.27613331 | 1.11130698  |

|   |            |             |             |
|---|------------|-------------|-------------|
| H | 5.45993661 | -4.49918379 | -3.44570598 |
| H | 3.86881361 | -5.86954716 | 2.99039001  |
| K | 0.20465800 | 0.10074000  | 0.48149700  |

145

n = 4, Energy = -401.271040325083 (54.5)

|   |             |             |             |
|---|-------------|-------------|-------------|
| C | -3.37691385 | 2.76780965  | 1.12351395  |
| C | -2.55193915 | 0.09832092  | 1.63228322  |
| C | -2.38102094 | 2.50661132  | 2.10145711  |
| C | -3.96031941 | 1.69426361  | 0.39995543  |
| C | -1.96853359 | 1.17186695  | 2.35584174  |
| C | -3.54783206 | 0.35951925  | 0.65434006  |
| C | -3.78940120 | 4.10255402  | 0.86912932  |
| C | -1.79761538 | 3.58015736  | 2.82501563  |
| C | -4.95621233 | 1.95546194  | -0.57798772 |
| C | -2.13945179 | -1.23642345 | 1.88666785  |
| C | -0.97264067 | 0.91066862  | 3.33378489  |
| C | -4.13123762 | -0.71402679 | -0.06921846 |
| C | -2.21010273 | 4.91490172  | 2.57063100  |
| C | -5.36869968 | 3.29020631  | -0.83237236 |
| C | -0.56015332 | -0.42407574 | 3.58816952  |
| C | -3.71875027 | -2.04877115 | 0.18516617  |
| C | -3.20599566 | 5.17610011  | 1.59268784  |
| C | -4.78529414 | 4.36375240  | -0.10881384 |
| C | -1.14355886 | -1.49762183 | 2.86461101  |
| C | -2.72285734 | -2.30996954 | 1.16310933  |
| C | -0.80172262 | 3.31895895  | 3.80295862  |
| C | -5.53961773 | 0.88191599  | -1.30154608 |

|   |             |             |             |
|---|-------------|-------------|-------------|
| C | -0.38923526 | 1.98421458  | 4.05734325  |
| C | -5.12713038 | -0.45282838 | -1.04716145 |
| H | -3.52262326 | 6.20065735  | 1.39742077  |
| H | -5.10192174 | 5.38830965  | -0.30408091 |
| H | -0.82693126 | -2.52217908 | 3.05987808  |
| H | -2.40622974 | -3.33452678 | 1.35837640  |
| H | -0.35389717 | 4.14301899  | 4.35836628  |
| H | 0.37521782  | 1.78371727  | 4.80801800  |
| H | -6.30407082 | 1.08241330  | -2.05222083 |
| H | -5.57495583 | -1.27688843 | -1.60256911 |
| H | -1.76227745 | 5.73896175  | 3.12603849  |
| H | 0.20429963  | -0.62457319 | 4.33884412  |
| H | -6.13315263 | 3.49070375  | -1.58304695 |
| H | -4.16657554 | -2.87283118 | -0.37024132 |
| C | 3.24650928  | -0.24225646 | 0.23380322  |
| C | 3.29426644  | -0.24121523 | 3.07340138  |
| C | 2.74921386  | -1.36132612 | 0.95267765  |
| C | 3.76768328  | 0.87733381  | 0.93472787  |
| C | 2.77309243  | -1.36080550 | 2.37247673  |
| C | 3.79156186  | 0.87785442  | 2.35452695  |
| C | 3.22263070  | -0.24277708 | -1.18599586 |
| C | 2.22803985  | -2.48091639 | 0.25175300  |
| C | 4.26497871  | 1.99640346  | 0.21585344  |
| C | 3.31814501  | -0.24069461 | 4.49320045  |
| C | 2.27579701  | -2.47987516 | 3.09135116  |
| C | 4.31273586  | 1.99744469  | 3.05545160  |
| C | 2.20416127  | -2.48143700 | -1.16804607 |

|   |             |             |             |
|---|-------------|-------------|-------------|
| C | 4.24110013  | 1.99588285  | -1.20394564 |
| C | 2.29967559  | -2.47935454 | 4.51115024  |
| C | 4.33661444  | 1.99796531  | 4.47525067  |
| C | 2.70145670  | -1.36236735 | -1.88692056 |
| C | 3.71992612  | 0.87629258  | -1.90487034 |
| C | 2.82084959  | -1.35976427 | 5.21207494  |
| C | 3.83931902  | 0.87889566  | 5.19412516  |
| C | 1.73074453  | -3.59998582 | 0.97062743  |
| C | 4.78615261  | 3.11599352  | 0.91677809  |
| C | 1.75462311  | -3.59946521 | 2.39042651  |
| C | 4.81003119  | 3.11651413  | 2.33657717  |
| H | 2.68312737  | -1.36276698 | -2.97676628 |
| H | 3.70159679  | 0.87589295  | -2.99471606 |
| H | 2.83917892  | -1.35936464 | 6.30192066  |
| H | 3.85764835  | 0.87929528  | 6.28397088  |
| H | 1.33068839  | -4.45938971 | 0.43259369  |
| H | 1.37289630  | -4.45846947 | 2.94223860  |
| H | 5.16787942  | 3.97499778  | 0.36496599  |
| H | 5.21008733  | 3.97591802  | 2.87461091  |
| H | 1.80410523  | -3.34084067 | -1.70607988 |
| H | 1.91794888  | -3.33835858 | 5.06296239  |
| H | 4.62282684  | 2.85488689  | -1.75575779 |
| H | 4.73667048  | 2.85736898  | 5.01328448  |
| C | -1.16146819 | -4.16035920 | -4.03447609 |
| C | -1.05762649 | -5.88501059 | -1.78050315 |
| C | 0.07556484  | -4.73050107 | -3.63311887 |
| C | -2.34658037 | -4.45254303 | -3.30884684 |

|   |             |             |             |
|---|-------------|-------------|-------------|
| C | 0.12748569  | -5.59282677 | -2.50613240 |
| C | -2.29465952 | -5.31486873 | -2.18186037 |
| C | -1.21338903 | -3.29803351 | -5.16146256 |
| C | 1.26067702  | -4.43831724 | -4.35874812 |
| C | -3.58361339 | -3.88240117 | -3.71020406 |
| C | -1.00570564 | -6.74733629 | -0.65351669 |
| C | 1.36451872  | -6.16296863 | -2.10477518 |
| C | -3.47977170 | -5.60705256 | -1.45623112 |
| C | 1.20875618  | -3.57599155 | -5.48573459 |
| C | -3.63553424 | -3.02007547 | -4.83719053 |
| C | 1.41643956  | -7.02529433 | -0.97778872 |
| C | -3.42785085 | -6.46937825 | -0.32924466 |
| C | -0.02827685 | -3.00584965 | -5.88709186 |
| C | -2.45042206 | -2.72789161 | -5.56281983 |
| C | 0.23132739  | -7.31747819 | -0.25215942 |
| C | -2.19081782 | -7.03952015 | 0.07211261  |
| C | 2.49770982  | -5.00845908 | -3.95739087 |
| C | -4.76872534 | -4.17458502 | -2.98457484 |
| C | 2.54963066  | -5.87078478 | -2.83040440 |
| C | -4.71680449 | -5.03691072 | -1.85758837 |
| H | -0.06813159 | -2.34392362 | -6.75217298 |
| H | -2.49027680 | -2.06596558 | -6.42790095 |
| H | 0.27118212  | -7.97940422 | 0.61292170  |
| H | -2.15096309 | -7.70144618 | 0.93719373  |
| H | 3.40740869  | -4.78417712 | -4.51438801 |
| H | 3.49918428  | -6.30842892 | -2.52232033 |
| H | -5.71827895 | -3.73694088 | -3.29265892 |

|   |             |             |             |
|---|-------------|-------------|-------------|
| H | -5.62650337 | -5.26119268 | -1.30059124 |
| H | 2.11845482  | -3.35170952 | -6.04273174 |
| H | 2.36599295  | -7.46293848 | -0.66970456 |
| H | -4.58508762 | -2.58243132 | -5.14527468 |
| H | -4.33754949 | -6.69366028 | 0.22775250  |
| C | -1.34656302 | 4.51646891  | -1.86180052 |
| C | -3.45712737 | 3.66181905  | -3.55906045 |
| C | -1.37373539 | 3.18096333  | -2.34355420 |
| C | -2.37467283 | 5.42464956  | -2.22867681 |
| C | -2.42901756 | 2.75363841  | -3.19218416 |
| C | -3.42995500 | 4.99732463  | -3.07730678 |
| C | -0.29128084 | 4.94379384  | -1.01317056 |
| C | -0.34562558 | 2.27278269  | -1.97667791 |
| C | -2.34750046 | 6.76015513  | -1.74692314 |
| C | -4.51240955 | 3.23449413  | -4.40769041 |
| C | -2.45618993 | 1.41813283  | -3.67393783 |
| C | -4.45806481 | 5.90550528  | -3.44418307 |
| C | 0.70965660  | 2.70010761  | -1.12804794 |
| C | -1.29221828 | 7.18748006  | -0.89829318 |
| C | -3.51147211 | 0.99080791  | -4.52256779 |
| C | -5.51334699 | 5.47818035  | -4.29281303 |
| C | 0.73682901  | 4.03561321  | -0.64629424 |
| C | -0.26410843 | 6.27929943  | -0.53141685 |
| C | -4.53958196 | 1.89898854  | -4.88944412 |
| C | -5.54051940 | 4.14267476  | -4.77456674 |
| C | -0.37279805 | 0.93727733  | -2.45843157 |
| C | -3.37561017 | 7.66833556  | -2.11379944 |



|   |             |             |             |
|---|-------------|-------------|-------------|
| C | -1.42808022 | 0.50995240  | -3.30706153 |
| C | -4.43089234 | 7.24101063  | -2.96242941 |
| H | 1.54686951  | 4.36363021  | 0.00511887  |
| H | 0.54593208  | 6.60731643  | 0.11999625  |
| H | -5.34962247 | 1.57097153  | -5.54085723 |
| H | -6.35055990 | 3.81465775  | -5.42597985 |
| H | 0.41638490  | 0.24015267  | -2.17681524 |
| H | -1.44893787 | -0.51518930 | -3.67685839 |
| H | -3.35475252 | 8.69347726  | -1.74400259 |
| H | -5.22007529 | 7.93813529  | -3.24404573 |
| H | 1.49883949  | 2.00298319  | -0.84643157 |
| H | -3.53232990 | -0.03433359 | -4.89236467 |
| H | -1.27136049 | 8.21262156  | -0.52849630 |
| H | -6.30252988 | 6.17530477  | -4.57442940 |
| K | 0.20465800  | 0.10074000  | 0.48149700  |

145

n = 4, Energy = -397.853055758465 (57.9)

|   |             |             |             |
|---|-------------|-------------|-------------|
| C | -3.54827651 | -1.81104661 | 0.83891611  |
| C | -4.56539777 | -4.37194349 | 1.52657231  |
| C | -3.86402008 | -2.11003971 | 2.19069613  |
| C | -3.74109358 | -2.79250195 | -0.16903580 |
| C | -4.37258070 | -3.39048815 | 2.53452422  |
| C | -4.24965420 | -4.07295039 | 0.17479229  |
| C | -3.03971589 | -0.53059817 | 0.49508802  |
| C | -3.67120301 | -1.12858436 | 3.19864804  |
| C | -3.42535001 | -2.49350885 | -1.52081582 |
| C | -5.07395840 | -5.65239193 | 1.87040040  |

|   |             |             |             |
|---|-------------|-------------|-------------|
| C | -4.68832427 | -3.68948124 | 3.88630424  |
| C | -4.44247127 | -5.05440573 | -0.83315963 |
| C | -3.16264239 | 0.15186408  | 2.85481995  |
| C | -2.91678939 | -1.21306041 | -1.86464392 |
| C | -5.19688490 | -4.96992968 | 4.23013233  |
| C | -4.95103190 | -6.33485417 | -0.48933153 |
| C | -2.84689880 | 0.45085723  | 1.50303992  |
| C | -2.72397230 | -0.23160502 | -0.85669201 |
| C | -5.38970198 | -5.95138508 | 3.22218043  |
| C | -5.26677548 | -6.63384732 | 0.86244850  |
| C | -3.98694657 | -1.42757753 | 4.55042783  |
| C | -3.61816709 | -3.47496413 | -2.52876751 |
| C | -4.49550719 | -2.70802597 | 4.89425593  |
| C | -4.12672772 | -4.75541257 | -2.18493941 |
| H | -2.45652482 | 1.43373662  | 1.23911555  |
| H | -2.33359832 | 0.75127437  | -1.12061638 |
| H | -5.78007596 | -6.93426447 | 3.48610480  |
| H | -5.65714946 | -7.61672671 | 1.12637287  |
| H | -3.83893909 | -0.67420682 | 5.32413748  |
| H | -4.73787375 | -2.93753476 | 5.93188998  |
| H | -3.37580054 | -3.24545534 | -3.56640156 |
| H | -4.27473519 | -5.50878328 | -2.95864906 |
| H | -3.01463488 | 0.90523477  | 3.62852936  |
| H | -5.43925146 | -5.19943859 | 5.26776617  |
| H | -2.67442282 | -0.98355150 | -2.90227776 |
| H | -5.09903940 | -7.08822487 | -1.26304094 |
| C | -1.37059232 | -6.84991959 | 0.92997195  |

|   |             |              |             |
|---|-------------|--------------|-------------|
| C | -1.51246450 | -6.06175127  | 3.65472194  |
| C | -1.69532689 | -7.80499384  | 1.92936212  |
| C | -1.11679384 | -5.50076118  | 1.29295678  |
| C | -1.76626298 | -7.41090968  | 3.29173711  |
| C | -1.18772993 | -5.10667701  | 2.65533177  |
| C | -1.29965622 | -7.24400375  | -0.43240305 |
| C | -1.94912537 | -9.15415225  | 1.56637729  |
| C | -0.79205926 | -4.54568692  | 0.29356661  |
| C | -1.58340060 | -5.66766711  | 5.01709693  |
| C | -2.09099756 | -8.36598393  | 4.29112728  |
| C | -0.93393145 | -3.75751860  | 3.01831660  |
| C | -1.87818928 | -9.54823641  | 0.20400229  |
| C | -0.72112317 | -4.93977108  | -1.06880838 |
| C | -2.16193365 | -7.97189977  | 5.65350227  |
| C | -1.00486754 | -3.36343444  | 4.38069159  |
| C | -1.55345470 | -8.59316218  | -0.79538793 |
| C | -0.97492164 | -6.28892951  | -1.43179327 |
| C | -1.90813517 | -6.62274134  | 6.01648715  |
| C | -1.32960212 | -4.31850868  | 5.38008181  |
| C | -2.27385989 | -10.10922628 | 2.56576739  |
| C | -0.53826084 | -3.19652873  | 0.65655150  |
| C | -2.34479598 | -9.71514212  | 3.92814239  |
| C | -0.60919693 | -2.80244457  | 2.01892649  |
| H | -1.49900376 | -8.89566339  | -1.84115460 |
| H | -0.92047070 | -6.59143072  | -2.47755994 |
| H | -1.96258612 | -6.32024014  | 7.06225382  |
| H | -1.38405306 | -4.01600747  | 6.42584848  |

|   |             |              |             |
|---|-------------|--------------|-------------|
| H | -2.46867705 | -11.14484798 | 2.28713819  |
| H | -2.59406409 | -10.44826258 | 4.69527997  |
| H | -0.28899272 | -2.46340828  | -0.11058608 |
| H | -0.41437977 | -1.76682288  | 2.29755570  |
| H | -2.07300638 | -10.58385791 | -0.07462703 |
| H | -2.41120171 | -8.70501999  | 6.42063984  |
| H | -0.47185511 | -4.20665087  | -1.83594596 |
| H | -0.81005044 | -2.32781295  | 4.65932091  |
| C | 1.66116074  | 2.42020424   | -1.39520851 |
| C | 0.15991602  | 3.40475791   | 0.80536366  |
| C | 0.28282659  | 2.72230105   | -1.55437054 |
| C | 2.28887254  | 2.61038426   | -0.13576040 |
| C | -0.46779577 | 3.21457789   | -0.45408445 |
| C | 1.53825017  | 3.10266110   | 0.96452568  |
| C | 2.41178311  | 1.92792740   | -2.49549459 |
| C | -0.34488520 | 2.53212103   | -2.81381865 |
| C | 3.66720669  | 2.30828745   | 0.02340163  |
| C | -0.59070634 | 3.89703475   | 1.90564974  |
| C | -1.84612993 | 3.51667471   | -0.61324648 |
| C | 2.16596197  | 3.29284112   | 2.22397379  |
| C | 0.40573716  | 2.03984420   | -3.91410473 |
| C | 4.41782905  | 1.81601061   | -1.07688446 |
| C | -2.59675229 | 4.00895154   | 0.48703960  |
| C | 1.41533960  | 3.78511795   | 3.32425988  |
| C | 1.78407135  | 1.73774736   | -3.75494275 |
| C | 3.79011729  | 1.62583057   | -2.33633261 |
| C | -1.96904053 | 4.19913158   | 1.74648776  |

|   |             |             |             |
|---|-------------|-------------|-------------|
| C | 0.03700542  | 4.08721479  | 3.16509790  |
| C | -1.72321916 | 2.83421784  | -2.97298054 |
| C | 4.29491829  | 2.49846748  | 1.28284960  |
| C | -2.47384152 | 3.32649467  | -1.87269445 |
| C | 3.54429593  | 2.99074431  | 2.38313568  |
| H | 2.36025327  | 1.35987291  | -4.59952850 |
| H | 4.36629922  | 1.24795611  | -3.18091837 |
| H | -2.54522245 | 4.57700604  | 2.59107351  |
| H | -0.53917651 | 4.46508924  | 4.00968365  |
| H | -2.20505433 | 2.68823458  | -3.93974008 |
| H | -3.53185868 | 3.55838591  | -1.99486815 |
| H | 5.35293544  | 2.26657624  | 1.40502330  |
| H | 4.02613109  | 3.13672757  | 3.34989523  |
| H | -0.07609778 | 1.89386090  | -4.88086418 |
| H | -3.65476928 | 4.24084278  | 0.36486609  |
| H | 5.47584605  | 1.58411937  | -0.95471094 |
| H | 1.89717455  | 3.93110125  | 4.29101933  |
| C | 2.51780378  | -3.50878945 | 2.92763483  |
| C | 2.48675434  | -5.54942982 | 0.95268614  |
| C | 2.65619457  | -3.17093089 | 1.55537405  |
| C | 2.36388827  | -4.86696819 | 3.31242127  |
| C | 2.64066985  | -4.19125108 | 0.56789970  |
| C | 2.34836355  | -5.88728837 | 2.32494693  |
| C | 2.53332850  | -2.48846926 | 3.91510918  |
| C | 2.81011009  | -1.81275216 | 1.17058761  |
| C | 2.22549747  | -5.20482674 | 4.68468206  |
| C | 2.47122962  | -6.56975000 | -0.03478820 |

|   |            |             |             |
|---|------------|-------------|-------------|
| C | 2.77906065 | -3.85339252 | -0.80436108 |
| C | 2.19444803 | -7.24546711 | 2.70973337  |
| C | 2.82563481 | -0.79243197 | 2.15806195  |
| C | 2.24102219 | -4.18450656 | 5.67215640  |
| C | 2.76353593 | -4.87371271 | -1.79183543 |
| C | 2.17892331 | -8.26578730 | 1.72225902  |
| C | 2.68724401 | -1.13029048 | 3.53032278  |
| C | 2.39493771 | -2.82632778 | 5.28737001  |
| C | 2.60962041 | -6.23189149 | -1.40704903 |
| C | 2.31731411 | -7.92792878 | 0.34999820  |
| C | 2.94850085 | -1.47489377 | -0.20167301 |
| C | 2.07158199 | -6.56300532 | 5.06946833  |
| C | 2.93297613 | -2.49521395 | -1.18914735 |
| C | 2.05605727 | -7.58332550 | 4.08199398  |
| H | 2.69916088 | -0.34708700 | 4.28831361  |
| H | 2.40685457 | -2.04312429 | 6.04536084  |
| H | 2.59770355 | -7.01509497 | -2.16503986 |
| H | 2.30539724 | -8.71113227 | -0.40799264 |
| H | 3.06664728 | -0.43234802 | -0.49703729 |
| H | 3.03920569 | -2.23587178 | -2.24250255 |
| H | 1.96535243 | -6.82234749 | 6.12282353  |
| H | 1.93791084 | -8.62587124 | 4.37735827  |
| H | 2.94378120 | 0.25011365  | 1.86269788  |
| H | 2.86976546 | -4.61437074 | -2.84519050 |
| H | 2.13479266 | -4.44384852 | 6.72551148  |
| H | 2.06077691 | -9.30833292 | 2.01762310  |
| K | 0.20465800 | 0.10074000  | 0.48149700  |

n = 5, Energy = -533.682687373414 (23.0)

|   |             |             |            |
|---|-------------|-------------|------------|
| C | 0.27375106  | 0.79058745  | 3.56911839 |
| C | -1.79833344 | 2.63532901  | 4.17656710 |
| C | 0.59498356  | 2.12693459  | 3.92603024 |
| C | -1.08352369 | 0.37661108  | 3.51593090 |
| C | -0.44105869 | 3.04930537  | 4.22975459 |
| C | -2.11956594 | 1.29898186  | 3.81965526 |
| C | 1.30979330  | -0.13178333 | 3.26539404 |
| C | 1.95225830  | 2.54091096  | 3.97921773 |
| C | -1.40475619 | -0.95973606 | 3.15901906 |
| C | -2.83437569 | 3.55769979  | 4.48029145 |
| C | -0.11982619 | 4.38565252  | 4.58666643 |
| C | -3.47684068 | 0.88500550  | 3.76646777 |
| C | 2.98830055  | 1.61854018  | 3.67549337 |
| C | -0.36871394 | -1.88210684 | 2.85529471 |
| C | -1.15586844 | 5.30802330  | 4.89039079 |
| C | -4.51288293 | 1.80737628  | 4.07019212 |
| C | 2.66706809  | 0.28219299  | 3.31858152 |
| C | 0.98856085  | -1.46813052 | 2.90848218 |
| C | -2.51314323 | 4.89404697  | 4.83720331 |
| C | -4.19165048 | 3.14372346  | 4.42710398 |
| C | 2.27349064  | 3.87725794  | 4.33612953 |
| C | -2.76203077 | -1.37371226 | 3.10583161 |
| C | 1.23744839  | 4.79962872  | 4.63985388 |
| C | -3.79807302 | -0.45134148 | 3.40955596 |
| H | 3.46233992  | -0.42582398 | 3.08544100 |

|   |             |             |             |
|---|-------------|-------------|-------------|
| H | 1.78383268  | -2.17614749 | 2.67534167  |
| H | -3.30841506 | 5.60206395  | 5.07034382  |
| H | -4.98692230 | 3.85174043  | 4.66024449  |
| H | 3.31534247  | 4.19502857  | 4.37695655  |
| H | 1.48402831  | 5.82541640  | 4.91382145  |
| H | -3.00861069 | -2.39949995 | 2.83186405  |
| H | -4.83992485 | -0.76911212 | 3.36872894  |
| H | 4.03015226  | 1.93631061  | 3.71632034  |
| H | -0.90928873 | 6.33381086  | 5.16435832  |
| H | -0.61529365 | -2.90789440 | 2.58132717  |
| H | -5.55473464 | 1.48960585  | 4.02936515  |
| C | 0.26565790  | 2.74830563  | -1.25900397 |
| C | -1.18716559 | 0.79289335  | -2.71888966 |
| C | -1.05020157 | 2.39563317  | -0.85833443 |
| C | 0.85510562  | 2.12327196  | -2.38961636 |
| C | -1.77661331 | 1.41792703  | -1.58827727 |
| C | 0.12869387  | 1.14556582  | -3.11955920 |
| C | 0.99206964  | 3.72601177  | -0.52906112 |
| C | -1.63964928 | 3.02066684  | 0.27227796  |
| C | 2.17096508  | 2.47594443  | -2.79028590 |
| C | -1.91357734 | -0.18481279 | -3.44883251 |
| C | -3.09247277 | 1.06525456  | -1.18760773 |
| C | 0.71814159  | 0.52053214  | -4.25017159 |
| C | -0.91323754 | 3.99837298  | 1.00222080  |
| C | 2.89737682  | 3.45365057  | -2.06034305 |
| C | -3.81888452 | 0.08754842  | -1.91755058 |
| C | -0.00827015 | -0.45717400 | -4.98011444 |



|   |             |             |             |
|---|-------------|-------------|-------------|
| C | 0.40262195  | 4.35104549  | 0.60155129  |
| C | 2.30792913  | 4.07868428  | -0.92973063 |
| C | -3.22943683 | -0.53748530 | -3.04816300 |
| C | -1.32412965 | -0.80984650 | -4.57944493 |
| C | -2.95550856 | 2.66799435  | 0.67294735  |
| C | 2.76041261  | 1.85091078  | -3.92089814 |
| C | -3.68192031 | 1.69028821  | -0.05699549 |
| C | 2.03400087  | 0.87320464  | -4.65084098 |
| H | 0.96021967  | 5.10153819  | 1.16185951  |
| H | 2.86552686  | 4.82917699  | -0.36942242 |
| H | -3.78703455 | -1.28797800 | -3.60847121 |
| H | -1.88172737 | -1.56033921 | -5.13975314 |
| H | -3.40797201 | 3.14777375  | 1.54081187  |
| H | -4.69198153 | 1.41957482  | 0.25056075  |
| H | 3.77047384  | 2.12162416  | -4.22845438 |
| H | 2.48646432  | 0.39342524  | -5.51870550 |
| H | -1.36570077 | 4.47815240  | 1.87008520  |
| H | -4.82894559 | -0.18316503 | -1.60999452 |
| H | 3.90743790  | 3.72436402  | -2.36789911 |
| H | 0.44419308  | -0.93695341 | -5.84797883 |
| C | 0.69510481  | -1.79807644 | 6.36508880  |
| C | -0.81765325 | 0.42832985  | 7.27078057  |
| C | -0.71936730 | -1.88863536 | 6.45150533  |
| C | 1.35319789  | -0.59431438 | 6.73151815  |
| C | -1.47574633 | -0.77543222 | 6.90435122  |
| C | 0.59681886  | 0.51888877  | 7.18436404  |
| C | 1.45148384  | -2.91127959 | 5.91224292  |

|   |             |             |            |
|---|-------------|-------------|------------|
| C | -1.37746037 | -3.09239743 | 6.08507598 |
| C | 2.76767000  | -0.50375546 | 6.64510162 |
| C | -1.57403228 | 1.54153300  | 7.72362645 |
| C | -2.89021843 | -0.86599114 | 6.99076775 |
| C | 1.25491193  | 1.72265083  | 7.55079339 |
| C | -0.62108134 | -4.20560058 | 5.63223010 |
| C | 3.52404903  | -1.61695861 | 6.19225574 |
| C | -3.64659746 | 0.24721201  | 7.44361363 |
| C | 0.49853290  | 2.83585398  | 8.00363927 |
| C | 0.79339080  | -4.11504170 | 5.54581355 |
| C | 2.86595598  | -2.82072072 | 5.82582637 |
| C | -2.98850442 | 1.45097412  | 7.81004300 |
| C | -0.91593924 | 2.74529511  | 8.09005582 |
| C | -2.79193228 | -3.18295622 | 6.17149254 |
| C | 3.42576287  | 0.70000648  | 7.01153095 |
| C | -3.54831131 | -2.06975308 | 6.62433842 |
| C | 2.66938384  | 1.81320963  | 7.46437683 |
| H | 1.37399158  | -4.96954267 | 5.19820651 |
| H | 3.44655676  | -3.67522168 | 5.47821933 |
| H | -3.56910520 | 2.30547509  | 8.15765004 |
| H | -1.49654001 | 3.59979607  | 8.43766286 |
| H | -3.29708829 | -4.10697084 | 5.89021928 |
| H | -4.63406817 | -2.13926664 | 6.69067224 |
| H | 4.51151973  | 0.76952004  | 6.94519713 |
| H | 3.17453986  | 2.73722425  | 7.74565009 |
| H | -1.12623712 | -5.12961512 | 5.35095685 |
| H | -4.73235415 | 0.17769862  | 7.50994749 |

|   |             |             |             |
|---|-------------|-------------|-------------|
| H | 4.60980571  | -1.54744522 | 6.12592188  |
| H | 1.00368869  | 3.75986852  | 8.28491252  |
| C | 2.28848551  | -2.75236751 | 9.62243142  |
| C | 0.86167075  | -5.08514411 | 8.85565082  |
| C | 0.87640588  | -2.79976295 | 9.76450486  |
| C | 2.98715776  | -3.87136037 | 9.09696768  |
| C | 0.16299850  | -3.96615125 | 9.38111456  |
| C | 2.27375038  | -5.03774867 | 8.71357738  |
| C | 3.00189289  | -1.58597921 | 10.00582172 |
| C | 0.17773363  | -1.68077009 | 10.28996860 |
| C | 4.39923739  | -3.82396493 | 8.95489424  |
| C | 0.14826337  | -6.25153241 | 8.47226053  |
| C | -1.24908113 | -4.01354669 | 9.52318800  |
| C | 2.97242263  | -6.15674153 | 8.18811364  |
| C | 0.89114101  | -0.51438179 | 10.67335890 |
| C | 5.11264477  | -2.65757663 | 9.33828454  |
| C | -1.96248851 | -5.17993499 | 9.13979771  |
| C | 2.25901525  | -7.32312983 | 7.80472335  |
| C | 2.30322067  | -0.46698630 | 10.53128547 |
| C | 4.41397255  | -1.53858372 | 9.86374829  |
| C | -1.26381629 | -6.29892790 | 8.61433395  |
| C | 0.84693559  | -7.37052532 | 7.94679677  |
| C | -1.23434580 | -1.72816563 | 10.43204198 |
| C | 5.09790944  | -4.94295768 | 8.42943057  |
| C | -1.94775318 | -2.89455393 | 10.04865168 |
| C | 4.38450206  | -6.10934598 | 8.04604027  |
| H | 2.85083617  | 0.42833989  | 10.82557801 |

|   |             |             |             |
|---|-------------|-------------|-------------|
| H | 4.96158805  | -0.64325753 | 10.15804083 |
| H | -1.81143179 | -7.19425409 | 8.32004141  |
| H | 0.29932010  | -8.26585151 | 7.65250423  |
| H | -1.77065062 | -0.86922034 | 10.83539094 |
| H | -3.03167356 | -2.93093493 | 10.15770807 |
| H | 6.18182982  | -4.90657669 | 8.32037418  |
| H | 4.92080688  | -6.96829128 | 7.64269131  |
| H | 0.35483642  | 0.34456345  | 11.07670781 |
| H | -3.04640872 | -5.21631614 | 9.24885402  |
| H | 6.19656498  | -2.62119548 | 9.22922823  |
| H | 2.79531984  | -8.18207507 | 7.40137443  |
| C | 2.33262717  | -3.01389711 | 0.18402165  |
| C | 3.21633823  | -4.77121891 | 2.23255146  |
| C | 1.51687953  | -4.10518242 | 0.58408691  |
| C | 3.59023034  | -2.80127269 | 0.80822129  |
| C | 1.95873505  | -4.98384332 | 1.60835181  |
| C | 4.03208587  | -3.67993359 | 1.83248619  |
| C | 1.89077164  | -2.13523621 | -0.84024326 |
| C | 0.25927635  | -4.31780684 | -0.04011273 |
| C | 4.40597799  | -1.70998738 | 0.40815603  |
| C | 3.65819375  | -5.64987981 | 3.25681636  |
| C | 1.14298741  | -6.07512864 | 2.00841708  |
| C | 5.28968904  | -3.46730918 | 2.45668584  |
| C | -0.18257917 | -3.43914594 | -1.06437764 |
| C | 3.96412246  | -0.83132648 | -0.61610888 |
| C | 1.58484293  | -6.95378954 | 3.03268198  |
| C | 5.73154457  | -4.34597008 | 3.48095074  |

|   |             |             |             |
|---|-------------|-------------|-------------|
| C | 0.63316845  | -2.34786059 | -1.46444294 |
| C | 2.70651927  | -1.04395086 | -1.24030856 |
| C | 2.84244613  | -6.74116516 | 3.65688167  |
| C | 4.91579694  | -5.43725543 | 3.88101605  |
| C | -0.55647109 | -5.40909203 | 0.35995255  |
| C | 5.66358096  | -1.49736309 | 1.03235565  |
| C | -0.11461556 | -6.28775293 | 1.38421746  |
| C | 6.10543649  | -2.37602399 | 2.05662055  |
| H | 0.29399768  | -1.67339556 | -2.25067441 |
| H | 2.36734850  | -0.36948583 | -2.02654003 |
| H | 3.18161690  | -7.41563019 | 4.44311314  |
| H | 5.25496772  | -6.11172045 | 4.66724752  |
| H | -1.52181446 | -5.57230376 | -0.11918664 |
| H | -0.74078812 | -7.12542976 | 1.69130982  |
| H | 6.28975352  | -0.65968626 | 0.72526329  |
| H | 7.07077986  | -2.21281226 | 2.53575975  |
| H | -1.14792236 | -3.60235751 | -1.54351685 |
| H | 0.95867060  | -7.79146628 | 3.33977441  |
| H | 4.59029480  | 0.00635026  | -0.92320130 |
| H | 6.69688776  | -4.18275851 | 3.96008996  |
| K | 0.20465800  | 0.10074000  | 0.48149700  |

181

n = 5, Energy = -529.520557401478 (27.2)

|   |             |             |             |
|---|-------------|-------------|-------------|
| C | -1.81333729 | -2.77400956 | -0.63150358 |
| C | -1.77340181 | -2.80250331 | 2.20807258  |
| C | -3.03223577 | -2.82431141 | 0.09524005  |
| C | -0.57447107 | -2.73795458 | 0.06154087  |

|   |             |             |             |
|---|-------------|-------------|-------------|
| C | -3.01226803 | -2.83855829 | 1.51502813  |
| C | -0.55450333 | -2.75220145 | 1.48132895  |
| C | -1.83330503 | -2.75976269 | -2.05129166 |
| C | -4.27110199 | -2.86036639 | -0.59780440 |
| C | 0.64442740  | -2.68765273 | -0.66520276 |
| C | -1.75343407 | -2.81675018 | 3.62786066  |
| C | -4.23116651 | -2.88886014 | 2.24177176  |
| C | 0.68436288  | -2.71614647 | 2.17437340  |
| C | -4.29106973 | -2.84611952 | -2.01759248 |
| C | 0.62445966  | -2.67340586 | -2.08499084 |
| C | -4.21119877 | -2.90310701 | 3.66155984  |
| C | 0.70433062  | -2.73039335 | 3.59416148  |
| C | -3.07217125 | -2.79581767 | -2.74433617 |
| C | -0.61440655 | -2.70946084 | -2.77803535 |
| C | -2.97233255 | -2.86705203 | 4.35460435  |
| C | -0.51456785 | -2.78069520 | 4.32090517  |
| C | -5.49000022 | -2.91066824 | 0.12893922  |
| C | 1.88329338  | -2.65159776 | 0.02784170  |
| C | -5.47003248 | -2.92491511 | 1.54872731  |
| C | 1.90326112  | -2.66584463 | 1.44762978  |
| H | -3.08749860 | -2.78488169 | -3.83417345 |
| H | -0.62973390 | -2.69852486 | -3.86787263 |
| H | -2.95700520 | -2.87798801 | 5.44444163  |
| H | -0.49924051 | -2.79163118 | 5.41074245  |
| H | -6.44096101 | -2.93834424 | -0.40304563 |
| H | -6.40566592 | -2.96352710 | 2.10657984  |
| H | 2.81892681  | -2.61298577 | -0.53001084 |

|   |             |             |             |
|---|-------------|-------------|-------------|
| H | 2.85422190  | -2.63816862 | 1.97961464  |
| H | -5.24203027 | -2.87379552 | -2.54957740 |
| H | -5.14683196 | -2.94171899 | 4.21941244  |
| H | 1.56009286  | -2.63479388 | -2.64284343 |
| H | 1.65529117  | -2.70271735 | 4.12614640  |
| C | 4.96745170  | 3.45637862  | -2.57016569 |
| C | 3.73949353  | 5.49591353  | -1.02161294 |
| C | 5.38896367  | 3.68384247  | -1.23338301 |
| C | 3.93196064  | 4.24868223  | -3.13267199 |
| C | 4.77498459  | 4.70360992  | -0.45910664 |
| C | 3.31798156  | 5.26844969  | -2.35839562 |
| C | 5.58143078  | 2.43661117  | -3.34444206 |
| C | 6.42445472  | 2.89153886  | -0.67087670 |
| C | 3.51044867  | 4.02121838  | -4.46945467 |
| C | 3.12551445  | 6.51568099  | -0.24733657 |
| C | 5.19649656  | 4.93107377  | 0.87767604  |
| C | 2.28249050  | 6.06075329  | -2.92090193 |
| C | 7.03843381  | 1.87177141  | -1.44515308 |
| C | 4.12442775  | 3.00145093  | -5.24373105 |
| C | 4.58251748  | 5.95084123  | 1.65195242  |
| C | 1.66851142  | 7.08052075  | -2.14662555 |
| C | 6.61692186  | 1.64430752  | -2.78193579 |
| C | 5.15991883  | 2.20914728  | -4.68122477 |
| C | 3.54702639  | 6.74314488  | 1.08944614  |
| C | 2.09002337  | 7.30798464  | -0.80984284 |
| C | 6.84596656  | 3.11900276  | 0.66590579  |
| C | 2.47495775  | 4.81352194  | -5.03196080 |

|   |             |             |             |
|---|-------------|-------------|-------------|
| C | 6.23198747  | 4.13877022  | 1.44018217  |
| C | 1.86097867  | 5.83328939  | -4.25768442 |
| H | 7.08821564  | 0.86152831  | -3.37627467 |
| H | 5.63121261  | 1.42636807  | -5.27556365 |
| H | 3.07573261  | 7.52592408  | 1.68378502  |
| H | 1.61872959  | 8.09076384  | -0.21550396 |
| H | 7.64081539  | 2.51082601  | 1.09768886  |
| H | 6.55554248  | 4.31337275  | 2.46630417  |
| H | 2.15140275  | 4.63891940  | -6.05808280 |
| H | 1.06612983  | 6.44146615  | -4.68946749 |
| H | 7.83328253  | 1.26359466  | -1.01337023 |
| H | 4.90607232  | 6.12544386  | 2.67807427  |
| H | 3.80087291  | 2.82684830  | -6.26985290 |
| H | 0.87366270  | 7.68869749  | -2.57840840 |
| C | -5.94844515 | 0.35851405  | 2.06688653  |
| C | -3.69222888 | 0.76919123  | 3.74212739  |
| C | -4.73956277 | 0.86302379  | 1.51873201  |
| C | -6.02921940 | 0.05934290  | 3.45266148  |
| C | -3.61145463 | 1.06836238  | 2.35635243  |
| C | -4.90111127 | 0.26468149  | 4.29028191  |
| C | -7.07655329 | 0.15317546  | 1.22926610  |
| C | -4.65878852 | 1.16219494  | 0.13295705  |
| C | -7.23810179 | -0.44516683 | 4.00081601  |
| C | -2.56412075 | 0.97452982  | 4.57974781  |
| C | -2.40257225 | 1.57287211  | 1.80819791  |
| C | -4.98188552 | -0.03448966 | 5.67605687  |
| C | -5.78689665 | 0.95685635  | -0.70466338 |



|   |             |             |             |
|---|-------------|-------------|-------------|
| C | -8.36620992 | -0.65050542 | 3.16319558  |
| C | -1.27446412 | 1.77821070  | 2.64581834  |
| C | -3.85377739 | 0.17084893  | 6.51367729  |
| C | -6.99577908 | 0.45234660  | -0.15650889 |
| C | -8.28543572 | -0.35133428 | 1.77742059  |
| C | -1.35523832 | 1.47903956  | 4.03159332  |
| C | -2.64489495 | 0.67535868  | 5.96552280  |
| C | -3.44990626 | 1.66670460  | -0.41519729 |
| C | -7.31887591 | -0.74433790 | 5.38659077  |
| C | -2.32179812 | 1.87204318  | 0.42242314  |
| C | -6.19076778 | -0.53899932 | 6.22421120  |
| H | -7.86172120 | 0.29472755  | -0.79947101 |
| H | -9.15137783 | -0.50895333 | 1.13445846  |
| H | -0.48929620 | 1.63665861  | 4.67455545  |
| H | -1.77895284 | 0.83297773  | 6.60848493  |
| H | -3.38790346 | 1.89635008  | -1.47892604 |
| H | -1.39385312 | 2.25930774  | 0.00165659  |
| H | -8.24682092 | -1.13160246 | 5.80735733  |
| H | -6.25277057 | -0.76864480 | 7.28793996  |
| H | -5.72489403 | 1.18650175  | -1.76839198 |
| H | -0.34651919 | 2.16547518  | 2.22505200  |
| H | -9.29415485 | -1.03776990 | 3.58396192  |
| H | -3.91578001 | -0.05879647 | 7.57740590  |
| C | -3.92102005 | 5.00938979  | 1.29044184  |
| C | -3.94621221 | 4.43139501  | 4.07088909  |
| C | -5.09427130 | 4.48728421  | 1.89648421  |
| C | -2.76036488 | 5.24249798  | 2.07462309  |

|   |             |            |             |
|---|-------------|------------|-------------|
| C | -5.10686737 | 4.19828683 | 3.28670784  |
| C | -2.77296096 | 4.95350059 | 3.46484671  |
| C | -3.90842397 | 5.29838718 | -0.09978179 |
| C | -6.25492646 | 4.25417603 | 1.11230296  |
| C | -1.58711364 | 5.76460355 | 1.46858071  |
| C | -3.95880828 | 4.14239763 | 5.46111271  |
| C | -6.28011862 | 3.67618125 | 3.89275021  |
| C | -1.61230579 | 5.18660878 | 4.24902796  |
| C | -6.24233038 | 4.54317341 | -0.27792066 |
| C | -1.57451756 | 6.05360094 | 0.07835709  |
| C | -6.29271470 | 3.38718386 | 5.28297384  |
| C | -1.62490187 | 4.89761139 | 5.63925159  |
| C | -5.06907914 | 5.06527900 | -0.88396309 |
| C | -2.73517273 | 5.82049276 | -0.70582422 |
| C | -5.13205953 | 3.62029204 | 6.06715515  |
| C | -2.79815312 | 4.37550580 | 6.24529402  |
| C | -7.42817748 | 3.73207052 | 1.71834536  |
| C | -0.42645870 | 5.99771167 | 2.25276194  |
| C | -7.44077356 | 3.44307314 | 3.10856898  |
| C | -0.43905478 | 5.70871428 | 3.64298557  |
| H | -5.05941032 | 5.28711501 | -1.95110653 |
| H | -2.72550391 | 6.04232878 | -1.77296765 |
| H | -5.14172835 | 3.39845603 | 7.13429858  |
| H | -2.80782194 | 4.15366979 | 7.31243746  |
| H | -8.31910302 | 3.55313534 | 1.11640337  |
| H | -8.34136792 | 3.04230192 | 3.57377055  |
| H | 0.47413566  | 6.39848289 | 1.78756038  |

|   |             |             |             |
|---|-------------|-------------|-------------|
| H | 0.45187076  | 5.88764946  | 4.24492755  |
| H | -7.13325569 | 4.36423832  | -0.87986269 |
| H | -7.19330883 | 2.98641271  | 5.74817548  |
| H | -0.67392343 | 6.45437210  | -0.38684456 |
| H | -0.73397656 | 5.07654649  | 6.24119361  |
| C | 2.87859686  | -0.03061497 | -3.05985157 |
| C | 2.97654813  | 1.14959862  | -0.47855327 |
| C | 3.80939161  | -0.50397355 | -2.09758713 |
| C | 1.99677774  | 1.03285040  | -2.73146686 |
| C | 3.85836725  | 0.08613324  | -0.80693798 |
| C | 2.04575338  | 1.62295720  | -1.44081771 |
| C | 2.82962122  | -0.62072177 | -4.35050072 |
| C | 4.69121073  | -1.56743893 | -2.42597184 |
| C | 1.06598299  | 1.50620898  | -3.69373131 |
| C | 3.02552377  | 1.73970542  | 0.81209588  |
| C | 4.78916200  | -0.38722534 | 0.15532647  |
| C | 1.16393426  | 2.68642258  | -1.11243300 |
| C | 4.64223509  | -2.15754573 | -3.71662099 |
| C | 1.01700735  | 0.91610218  | -4.98438046 |
| C | 4.83813764  | 0.20288146  | 1.44597562  |
| C | 1.21290990  | 3.27652937  | 0.17821615  |
| C | 3.71144033  | -1.68418717 | -4.67888549 |
| C | 1.89882646  | -0.14736322 | -5.31276522 |
| C | 3.95631853  | 1.26634686  | 1.77436038  |
| C | 2.14370466  | 2.80317082  | 1.14048065  |
| C | 5.62200530  | -2.04079736 | -1.46370745 |
| C | 0.18416405  | 2.56967421  | -3.36534654 |

|   |             |             |             |
|---|-------------|-------------|-------------|
| C | 5.67098094  | -1.45069056 | -0.17305830 |
| C | 0.23313969  | 3.15978101  | -2.07469739 |
| H | 3.67384636  | -2.13715645 | -5.66959500 |
| H | 1.86123249  | -0.60033250 | -6.30347473 |
| H | 3.99391250  | 1.71931614  | 2.76506989  |
| H | 2.18129863  | 3.25614010  | 2.13119016  |
| H | 6.29889469  | -2.85711945 | -1.71577741 |
| H | 6.38546431  | -1.81404332 | 0.56558136  |
| H | -0.53031932 | 2.93302697  | -4.10398620 |
| H | -0.44374970 | 3.97610309  | -1.82262743 |
| H | 5.31912430  | -2.97386769 | -3.96869106 |
| H | 5.55262083  | -0.16047112 | 2.18461527  |
| H | 0.30252416  | 1.27945477  | -5.72302011 |
| H | 0.53602069  | 4.09285134  | 0.43028622  |
| K | 0.20465800  | 0.10074000  | 0.48149700  |

181

n = 5, Energy = -523.823377411255 (32.9)

|   |            |            |             |
|---|------------|------------|-------------|
| C | 4.07539524 | 5.08868423 | -1.97871668 |
| C | 4.42242594 | 4.75092892 | 0.81969189  |
| C | 3.22723795 | 5.77531709 | -1.07011084 |
| C | 5.09706789 | 4.23317371 | -1.48811824 |
| C | 3.40075330 | 5.60643944 | 0.32909345  |
| C | 5.27058324 | 4.06429606 | -0.08891395 |
| C | 3.90187989 | 5.25756188 | -3.37792097 |
| C | 2.20556530 | 6.63082761 | -1.56070928 |
| C | 5.94522519 | 3.54654084 | -2.39672409 |
| C | 4.59594129 | 4.58205127 | 2.21889618  |

|   |             |             |             |
|---|-------------|-------------|-------------|
| C | 2.55259600  | 6.29307231  | 1.23769929  |
| C | 6.29225589  | 3.20878554  | 0.40168449  |
| C | 2.03204995  | 6.79970526  | -2.95991357 |
| C | 5.77170984  | 3.71541849  | -3.79592838 |
| C | 2.72611135  | 6.12419466  | 2.63690358  |
| C | 6.46577124  | 3.03990789  | 1.80088878  |
| C | 2.88020724  | 6.11307240  | -3.86851947 |
| C | 4.75003718  | 4.57092902  | -4.28652688 |
| C | 3.74778400  | 5.26868413  | 3.12750208  |
| C | 5.61761395  | 3.72654075  | 2.70949468  |
| C | 1.35740818  | 7.31746033  | -0.65210348 |
| C | 6.96689766  | 2.69103048  | -1.90612560 |
| C | 1.53092353  | 7.14858267  | 0.74710081  |
| C | 7.14041301  | 2.52215282  | -0.50692132 |
| H | 2.74701588  | 6.24270383  | -4.94255652 |
| H | 4.61684583  | 4.70056045  | -5.36056392 |
| H | 3.88097536  | 5.13905270  | 4.20153913  |
| H | 5.75080530  | 3.59690932  | 3.78353172  |
| H | 0.57316642  | 7.97415508  | -1.02868962 |
| H | 0.87987314  | 7.67564599  | 1.44455183  |
| H | 7.61794804  | 2.16396716  | -2.60357662 |
| H | 7.92465476  | 1.86545807  | -0.13033517 |
| H | 1.24780836  | 7.45639987  | -3.33649981 |
| H | 2.07506115  | 6.65125781  | 3.33435462  |
| H | 6.42276004  | 3.18835534  | -4.49337941 |
| H | 7.25001282  | 2.38321328  | 2.17747502  |
| C | -1.02335396 | -2.34440201 | -1.18376943 |

|   |             |             |             |
|---|-------------|-------------|-------------|
| C | -2.02188710 | -3.73420373 | 1.08272175  |
| C | -2.42316034 | -2.51112809 | -1.01305152 |
| C | -0.12281415 | -2.87257679 | -0.22124175 |
| C | -2.92242690 | -3.20602895 | 0.12019407  |
| C | -0.62208072 | -3.56747765 | 0.91200384  |
| C | -0.52408740 | -1.64950115 | -2.31701502 |
| C | -3.32370014 | -1.98295331 | -1.97557920 |
| C | 1.27699222  | -2.70585071 | -0.39195966 |
| C | -2.52115366 | -4.42910459 | 2.21596734  |
| C | -4.32223328 | -3.37275503 | 0.29091198  |
| C | 0.27845909  | -4.09565243 | 1.87453152  |
| C | -2.82443358 | -1.28805245 | -3.10882479 |
| C | 1.77625879  | -2.01094985 | -1.52520525 |
| C | -4.82149984 | -4.06765589 | 1.42415757  |
| C | -0.22080748 | -4.79055329 | 3.00777711  |
| C | -1.42462718 | -1.12132634 | -3.27954274 |
| C | 0.87571900  | -1.48277504 | -2.48773298 |
| C | -3.92096006 | -4.59583070 | 2.38668530  |
| C | -1.62061388 | -4.95727940 | 3.17849507  |
| C | -4.72350630 | -2.14967942 | -1.80486121 |
| C | 2.17753180  | -3.23402545 | 0.57056794  |
| C | -5.22277286 | -2.84458028 | -0.67161562 |
| C | 1.67826524  | -3.92892632 | 1.70381353  |
| H | -1.04138737 | -0.58791655 | -4.14942840 |
| H | 1.25895881  | -0.94936525 | -3.35761863 |
| H | -4.30419987 | -5.12924049 | 3.25657096  |
| H | -2.00385369 | -5.49068919 | 4.04838072  |

|   |             |             |             |
|---|-------------|-------------|-------------|
| H | -5.41476580 | -1.74424946 | -2.54370293 |
| H | -6.29727222 | -2.97256017 | -0.54057159 |
| H | 3.25203116  | -3.10604557 | 0.43952392  |
| H | 2.36952475  | -4.33435628 | 2.44265526  |
| H | -3.51569284 | -0.88262249 | -3.84766648 |
| H | -5.89599900 | -4.19563584 | 1.55520172  |
| H | 2.85075794  | -1.88296990 | -1.65624940 |
| H | 0.47045178  | -5.19598325 | 3.74661881  |
| C | 3.03073406  | 1.34617038  | -0.26735240 |
| C | 2.97646994  | 1.33073556  | -3.10679190 |
| C | 3.95025273  | 0.54139258  | -0.99069063 |
| C | 2.08408333  | 2.14323077  | -0.96373392 |
| C | 3.92312067  | 0.53367517  | -2.41041038 |
| C | 2.05695127  | 2.13551336  | -2.38345367 |
| C | 3.05786612  | 1.35388779  | 1.15236735  |
| C | 4.89690345  | -0.25566781 | -0.29430911 |
| C | 1.16456467  | 2.94800856  | -0.24039569 |
| C | 2.94933788  | 1.32301815  | -4.52651165 |
| C | 4.84263933  | -0.27110262 | -3.13374861 |
| C | 1.11030055  | 2.93257374  | -3.07983519 |
| C | 4.92403551  | -0.24795040 | 1.12541064  |
| C | 1.19169673  | 2.95572597  | 1.17932407  |
| C | 4.81550727  | -0.27882003 | -4.55346836 |
| C | 1.08316849  | 2.92485634  | -4.49955494 |
| C | 4.00451684  | 0.55682740  | 1.84874893  |
| C | 2.13834745  | 2.15866558  | 1.87570564  |
| C | 3.86885655  | 0.51824036  | -5.24984994 |

|   |             |             |             |
|---|-------------|-------------|-------------|
| C | 2.00268716  | 2.12007854  | -5.22289323 |
| C | 5.81642194  | -1.06044545 | -1.01764734 |
| C | 0.21791412  | 3.74506879  | -0.93677721 |
| C | 5.78928988  | -1.06816285 | -2.43736709 |
| C | 0.19078206  | 3.73735139  | -2.35649696 |
| H | 4.02534356  | 0.56275133  | 2.93853376  |
| H | 2.15917417  | 2.16458951  | 2.96549047  |
| H | 3.84802983  | 0.51231643  | -6.33963477 |
| H | 1.98186044  | 2.11415461  | -6.31267806 |
| H | 6.54307644  | -1.67227355 | -0.48310093 |
| H | 6.49511766  | -1.68591489 | -2.99260563 |
| H | -0.48791366 | 4.36282083  | -0.38153867 |
| H | -0.53587244 | 4.34917949  | -2.89104337 |
| H | 5.65068983  | -0.85977835 | 1.65995711  |
| H | 5.52133487  | -0.89657191 | -5.10870696 |
| H | 0.48586913  | 3.57347785  | 1.73456266  |
| H | 0.35651417  | 3.53668429  | -5.03410141 |
| C | 4.13816266  | -2.19565816 | 5.75214281  |
| C | 6.22131847  | -2.64417114 | 3.87467178  |
| C | 4.23090200  | -3.44247038 | 5.07889784  |
| C | 5.08700122  | -1.17310243 | 5.48665226  |
| C | 5.27247990  | -3.66672687 | 4.14016233  |
| C | 6.12857913  | -1.39735892 | 4.54791674  |
| C | 3.09658475  | -1.97140167 | 6.69087832  |
| C | 3.28206343  | -4.46502611 | 5.34438840  |
| C | 4.99426188  | 0.07370979  | 6.15989722  |
| C | 7.26289638  | -2.86842763 | 2.93593626  |



|   |             |             |            |
|---|-------------|-------------|------------|
| C | 5.36521924  | -4.91353909 | 3.46691736 |
| C | 7.07741770  | -0.37480319 | 4.28242619 |
| C | 2.24048552  | -4.24076962 | 6.28312391 |
| C | 3.95268398  | 0.29796628  | 7.09863274 |
| C | 6.40679715  | -5.13779558 | 2.52818185 |
| C | 8.11899560  | -0.59905968 | 3.34369067 |
| C | 2.14774614  | -2.99395739 | 6.95636892 |
| C | 3.00384537  | -0.72458944 | 7.36412333 |
| C | 7.35563576  | -4.11523986 | 2.26269126 |
| C | 8.21173499  | -1.84587191 | 2.67044567 |
| C | 3.37480285  | -5.71183811 | 4.67114347 |
| C | 5.94310037  | 1.09626530  | 5.89440663 |
| C | 4.41638076  | -5.93609460 | 3.73240795 |
| C | 6.98467827  | 0.87200881  | 4.95567111 |
| H | 1.34822511  | -2.82181685 | 7.67694755 |
| H | 2.20432434  | -0.55244890 | 8.08470196 |
| H | 8.15515679  | -4.28738039 | 1.54211262 |
| H | 9.01125602  | -2.01801245 | 1.94986703 |
| H | 2.64646897  | -6.49675773 | 4.87493552 |
| H | 4.48756799  | -6.89315477 | 3.21562129 |
| H | 5.87191313  | 2.05332547  | 6.41119329 |
| H | 7.71301216  | 1.65692843  | 4.75187906 |
| H | 1.51215168  | -5.02568901 | 6.48691604 |
| H | 6.47798451  | -6.09485554 | 2.01139518 |
| H | 3.88149662  | 1.25502624  | 7.61541940 |
| H | 8.84732945  | 0.18585971  | 3.13989854 |
| C | -1.10619654 | 1.94553530  | 3.64115550 |

|   |             |             |            |
|---|-------------|-------------|------------|
| C | -1.94427741 | 4.45152904  | 2.60037917 |
| C | -1.98529813 | 1.99345327  | 2.52702609 |
| C | -0.64613539 | 3.15061420  | 4.23489675 |
| C | -2.40433857 | 3.24645014  | 2.00663793 |
| C | -1.06517582 | 4.40361107  | 3.71450858 |
| C | -0.68715611 | 0.69253843  | 4.16154367 |
| C | -2.44535929 | 0.78837438  | 1.93328485 |
| C | 0.23296620  | 3.10269622  | 5.34902616 |
| C | -2.36331785 | 5.70452591  | 2.07999101 |
| C | -3.28344016 | 3.29436812  | 0.89250852 |
| C | -0.60511467 | 5.60868996  | 4.30824983 |
| C | -2.02631885 | -0.46462249 | 2.45367301 |
| C | 0.65200663  | 1.84969936  | 5.86941432 |
| C | -3.70248059 | 4.54736498  | 0.37212036 |
| C | -1.02415511 | 6.86168683  | 3.78786167 |
| C | -1.14721725 | -0.51254051 | 3.56780244 |
| C | 0.19194550  | 0.64462041  | 5.27567310 |
| C | -3.24241945 | 5.75244393  | 0.96586158 |
| C | -1.90325671 | 6.90960485  | 2.67373224 |
| C | -3.32446075 | 0.83629246  | 0.81915560 |
| C | 0.69302722  | 4.30777501  | 5.94276724 |
| C | -3.74350118 | 2.08928933  | 0.29876744 |
| C | 0.27398679  | 5.56077188  | 5.42237907 |
| H | -0.82555946 | -1.47434792 | 3.96725531 |
| H | 0.51360328  | -0.31718700 | 5.67512596 |
| H | -3.56407724 | 6.71425134  | 0.56640871 |
| H | -2.22491449 | 7.87141226  | 2.27427937 |

|   |             |             |             |
|---|-------------|-------------|-------------|
| H | -3.67760632 | -0.08873296 | 0.36339642  |
| H | -4.41830457 | 2.12607142  | -0.55644465 |
| H | 1.36783062  | 4.27099292  | 6.79797933  |
| H | 0.62713236  | 6.48579730  | 5.87813825  |
| H | -2.37946428 | -1.38964785 | 1.99791402  |
| H | -4.37728387 | 4.58414724  | -0.48309159 |
| H | 1.32680991  | 1.81291710  | 6.72462627  |
| H | -0.67100968 | 7.78671219  | 4.24362066  |
| K | 0.20465800  | 0.10074000  | 0.48149700  |

181

n = 5, Energy = -497.943021858099 (58.8)

|   |             |             |             |
|---|-------------|-------------|-------------|
| C | -0.60160585 | 2.89855192  | 1.38222931  |
| C | 0.61859122  | 1.20951481  | 3.31196303  |
| C | 0.81248913  | 2.87062434  | 1.50854447  |
| C | -1.40560229 | 2.08196093  | 2.22078101  |
| C | 1.42258766  | 2.02610579  | 2.47341133  |
| C | -0.79550376 | 1.23744238  | 3.18564788  |
| C | -1.21170438 | 3.74307047  | 0.41736244  |
| C | 1.61648557  | 3.68721533  | 0.66999276  |
| C | -2.81969727 | 2.10988851  | 2.09446585  |
| C | 1.22868975  | 0.36499625  | 4.27682990  |
| C | 2.83668264  | 1.99817821  | 2.59972649  |
| C | -1.59950020 | 0.42085140  | 4.02419958  |
| C | 1.00638704  | 4.53173388  | -0.29487410 |
| C | -3.42979581 | 2.95440706  | 1.12959899  |
| C | 3.44678118  | 1.15365966  | 3.56459335  |
| C | -0.98940167 | -0.42366716 | 4.98906645  |

|   |             |             |             |
|---|-------------|-------------|-------------|
| C | -0.40770797 | 4.55966149  | -0.42118930 |
| C | -2.62579939 | 3.77099808  | 0.29104724  |
| C | 2.64278476  | 0.33706864  | 4.40314510  |
| C | 0.42469333  | -0.45159477 | 5.11538164  |
| C | 3.03058034  | 3.65928768  | 0.79630799  |
| C | -3.62369350 | 1.29329760  | 2.93301749  |
| C | 3.64067887  | 2.81476912  | 1.76117485  |
| C | -3.01359497 | 0.44877905  | 3.89788435  |
| H | -0.87602302 | 5.20791866  | -1.16182651 |
| H | -3.09411444 | 4.41925525  | -0.44958996 |
| H | 3.11109981  | -0.31118853 | 5.14378230  |
| H | 0.89300838  | -1.09985194 | 5.85601885  |
| H | 3.64773261  | 4.28610756  | 0.15263092  |
| H | 4.72614624  | 2.79333177  | 1.85813507  |
| H | -4.70916087 | 1.31473495  | 2.83605727  |
| H | -3.63074724 | -0.17804084 | 4.54156142  |
| H | 1.62353907  | 5.15855373  | -0.93855114 |
| H | 4.53224836  | 1.13222219  | 3.66155368  |
| H | -4.51526299 | 2.97584453  | 1.03263866  |
| H | -1.60655370 | -1.05048701 | 5.63274348  |
| C | -0.89417922 | -1.77990026 | -1.62998663 |
| C | -0.40639925 | -2.89469372 | 0.93612050  |
| C | -1.92824818 | -1.80151948 | -0.65703541 |
| C | 0.38377972  | -2.31567777 | -1.31988428 |
| C | -1.68435820 | -2.35891621 | 0.62601815  |
| C | 0.62766971  | -2.87307450 | -0.03683072 |
| C | -1.13806921 | -1.22250354 | -2.91304019 |

|   |             |             |             |
|---|-------------|-------------|-------------|
| C | -3.20620713 | -1.26574197 | -0.96713776 |
| C | 1.41784869  | -2.29405856 | -2.29283550 |
| C | -0.16250926 | -3.45209044 | 2.21917406  |
| C | -2.71842716 | -2.38053542 | 1.59896937  |
| C | 1.90562866  | -3.40885201 | 0.27327163  |
| C | -3.45009712 | -0.70834525 | -2.25019132 |
| C | 1.17395870  | -1.73666183 | -3.57588906 |
| C | -2.47453717 | -2.93793215 | 2.88202293  |
| C | 2.14951865  | -3.96624873 | 1.55632519  |
| C | -2.41602817 | -0.68672601 | -3.22314259 |
| C | -0.10400026 | -1.20088430 | -3.88599146 |
| C | -1.19657821 | -3.47370968 | 3.19212533  |
| C | 1.11544970  | -3.98786797 | 2.52927646  |
| C | -4.24027587 | -1.28736124 | 0.00581340  |
| C | 2.69580741  | -2.82983601 | -1.98273309 |
| C | -3.99638588 | -1.84475797 | 1.28886696  |
| C | 2.93969740  | -3.38723274 | -0.69967953 |
| H | -2.60323949 | -0.25886516 | -4.20802168 |
| H | -0.29121158 | -0.77302345 | -4.87087055 |
| H | -1.00936689 | -3.90157053 | 4.17700442  |
| H | 1.30266102  | -4.41572882 | 3.51415555  |
| H | -5.22124445 | -0.87609537 | -0.23222292 |
| H | -4.79014313 | -1.86135299 | 2.03570985  |
| H | 3.48956465  | -2.81324099 | -2.72957598 |
| H | 3.92066598  | -3.79849861 | -0.46164321 |
| H | -4.43106549 | -0.29707941 | -2.48822775 |
| H | -3.26829418 | -2.95452725 | 3.62886581  |

|   |             |             |             |
|---|-------------|-------------|-------------|
| H | 1.96771571  | -1.72006673 | -4.32273194 |
| H | 3.13048702  | -4.37751457 | 1.79436162  |
| C | -0.35169125 | 6.87273325  | 7.70459219  |
| C | -2.67272179 | 7.88735270  | 6.42047222  |
| C | -1.63801795 | 6.42310404  | 8.10408845  |
| C | -0.22587982 | 7.82967219  | 6.66303593  |
| C | -2.79853322 | 6.93041377  | 7.46202847  |
| C | -1.38639509 | 8.33698191  | 6.02097595  |
| C | 0.80882402  | 6.36542352  | 8.34665217  |
| C | -1.76382938 | 5.46616510  | 9.14564471  |
| C | 1.06044688  | 8.27930140  | 6.26353966  |
| C | -3.83323706 | 8.39466243  | 5.77841223  |
| C | -4.08485992 | 6.48078456  | 7.86152474  |
| C | -1.26058366 | 9.29392085  | 4.97941970  |
| C | -0.60331411 | 4.95885537  | 9.78770469  |
| C | 2.22096216  | 7.77199167  | 6.90559965  |
| C | -5.24537519 | 6.98809428  | 7.21946475  |
| C | -2.42109893 | 9.80123058  | 4.33735971  |
| C | 0.68301264  | 5.40848456  | 9.38820845  |
| C | 2.09515077  | 6.81505271  | 7.94715593  |
| C | -5.11956381 | 7.94503324  | 6.17790847  |
| C | -3.70742568 | 9.35160139  | 4.73685595  |
| C | -3.05015594 | 5.01653602  | 9.54514084  |
| C | 1.18625818  | 9.23624020  | 5.22198355  |
| C | -4.21067121 | 5.52384575  | 8.90308085  |
| C | 0.02574291  | 9.74354993  | 4.57992357  |
| H | 1.57383066  | 5.01907077  | 9.88105729  |

|   |             |             |             |
|---|-------------|-------------|-------------|
| H | 2.98596879  | 6.42563892  | 8.44000477  |
| H | -6.01038182 | 8.33444703  | 5.68505964  |
| H | -4.59824369 | 9.74101518  | 4.24400712  |
| H | -3.14672953 | 4.28198424  | 10.34464535 |
| H | -5.19806292 | 5.17870780  | 9.20973648  |
| H | 2.17364988  | 9.58137816  | 4.91532792  |
| H | 0.12231650  | 10.47810172 | 3.78041905  |
| H | -0.69988751 | 4.22430370  | 10.58720910 |
| H | -6.23276681 | 6.64295648  | 7.52612021  |
| H | 3.20835377  | 8.11712947  | 6.59894419  |
| H | -2.32452552 | 10.53578226 | 3.53785531  |
| C | -1.46515183 | 3.74235368  | 5.71695889  |
| C | 1.10513488  | 4.64468007  | 4.91381954  |
| C | -1.34225868 | 4.70090327  | 4.67653588  |
| C | -0.30290163 | 3.23496728  | 6.35581222  |
| C | -0.05711532 | 5.15206646  | 4.27496621  |
| C | 0.98224173  | 3.68613048  | 5.95424255  |
| C | -2.75029519 | 3.29119048  | 6.11852856  |
| C | -2.50450889 | 5.20828967  | 4.03768255  |
| C | -0.42579478 | 2.27641769  | 7.39623523  |
| C | 2.39027824  | 5.09584326  | 4.51224987  |
| C | 0.06577783  | 6.11061606  | 3.23454321  |
| C | 2.14449194  | 3.17874408  | 6.59309588  |
| C | -3.78965224 | 4.75712647  | 4.43925222  |
| C | -1.71093813 | 1.82525449  | 7.79780490  |
| C | 1.35092118  | 6.56177925  | 2.83297353  |
| C | 3.42963529  | 3.62990728  | 6.19152621  |

|   |             |             |             |
|---|-------------|-------------|-------------|
| C | -3.91254545 | 3.79857686  | 5.47967525  |
| C | -2.87318839 | 2.33264087  | 7.15895158  |
| C | 2.51317144  | 6.05439287  | 3.47182685  |
| C | 3.55252850  | 4.58845689  | 5.15110319  |
| C | -2.38161563 | 6.16683912  | 2.99725971  |
| C | 0.73645533  | 1.76903144  | 8.03508840  |
| C | -1.09647228 | 6.61800231  | 2.59569004  |
| C | 2.02159868  | 2.22019463  | 7.63351872  |
| H | -4.89902868 | 3.45226147  | 5.78792237  |
| H | -3.85967163 | 1.98632548  | 7.46719871  |
| H | 3.49965468  | 6.40070827  | 3.16357972  |
| H | 4.53901173  | 4.93477228  | 4.84285606  |
| H | -3.27376551 | 6.55631182  | 2.50687223  |
| H | -1.00213881 | 7.35379045  | 1.79705540  |
| H | 0.64212186  | 1.03324330  | 8.83372303  |
| H | 2.91374856  | 1.83072193  | 8.12390620  |
| H | -4.68180207 | 5.14659901  | 3.94886493  |
| H | 1.44525480  | 7.29756726  | 2.03433904  |
| H | -1.80527175 | 1.08946648  | 8.59643939  |
| H | 4.32178512  | 3.24043473  | 6.68191350  |
| C | -1.69171219 | -5.28054212 | -2.32856865 |
| C | -2.60232143 | -5.94643231 | 0.27776605  |
| C | -3.02606941 | -4.98260829 | -1.94499816 |
| C | -0.81265959 | -5.91142105 | -1.40897179 |
| C | -3.48137403 | -5.31555338 | -0.64183081 |
| C | -1.26796421 | -6.24436614 | -0.10580444 |
| C | -1.23640757 | -4.94759703 | -3.63173600 |



|   |             |             |             |
|---|-------------|-------------|-------------|
| C | -3.90512200 | -4.35172936 | -2.86459502 |
| C | 0.52169763  | -6.20935488 | -1.79254228 |
| C | -3.05762605 | -6.27937740 | 1.58093340  |
| C | -4.81573124 | -5.01761955 | -0.25826032 |
| C | -0.38891161 | -6.87524507 | 0.81379242  |
| C | -3.44981738 | -4.01878427 | -4.16776237 |
| C | 0.97700225  | -5.87640979 | -3.09570963 |
| C | -5.27103587 | -5.35056464 | 1.04490703  |
| C | -0.84421623 | -7.20819016 | 2.11695977  |
| C | -2.11546014 | -4.31671809 | -4.55133292 |
| C | 0.09794967  | -5.24553085 | -4.01530655 |
| C | -4.39198329 | -5.98144358 | 1.96450395  |
| C | -2.17857347 | -6.91025634 | 2.50053032  |
| C | -5.23947901 | -4.05379562 | -2.48102448 |
| C | 1.40075001  | -6.84023372 | -0.87294547 |
| C | -5.69478363 | -4.38674071 | -1.17785713 |
| C | 0.94544539  | -7.17317881 | 0.43022188  |
| H | -1.76596577 | -4.06114757 | -5.55165147 |
| H | 0.44744405  | -4.98996033 | -5.01562510 |
| H | -4.74147766 | -6.23701410 | 2.96482250  |
| H | -2.52806785 | -7.16582686 | 3.50084887  |
| H | -5.91424481 | -3.56952935 | -3.18691226 |
| H | -6.71904384 | -4.15804499 | -0.88342625 |
| H | 2.42501023  | -7.06892944 | -1.16737635 |
| H | 1.62021119  | -7.65744508 | 1.13610966  |
| H | -4.12458295 | -3.53451808 | -4.87365016 |
| H | -6.29529589 | -5.12186903 | 1.33933802  |

|   |             |             |             |
|---|-------------|-------------|-------------|
| H | 2.00126227  | -6.10510540 | -3.39014062 |
| H | -0.16945067 | -7.69245635 | 2.82284756  |
| K | 0.20465800  | 0.10074000  | 0.48149700  |

181

n = 5, Energy = -487.611828734242 (69.1)

|   |             |            |             |
|---|-------------|------------|-------------|
| C | 4.37006078  | 3.83187865 | -3.28151889 |
| C | 2.33706008  | 3.06341192 | -5.10962353 |
| C | 4.52421701  | 2.65521719 | -4.06132897 |
| C | 3.19940420  | 4.62430673 | -3.41576113 |
| C | 3.50771666  | 2.27098383 | -4.97538129 |
| C | 2.18290385  | 4.24007337 | -4.32981344 |
| C | 5.38656113  | 4.21611201 | -2.36746657 |
| C | 5.69487358  | 1.86278911 | -3.92708674 |
| C | 3.04524797  | 5.80096818 | -2.63595105 |
| C | 1.32055973  | 2.67917855 | -6.02367584 |
| C | 3.66187289  | 1.09432238 | -5.75519137 |
| C | 1.01224727  | 5.03250145 | -4.46405568 |
| C | 6.71137393  | 2.24702247 | -3.01303442 |
| C | 4.06174832  | 6.18520155 | -1.72189873 |
| C | 2.64537254  | 0.71008901 | -6.66924369 |
| C | -0.00425308 | 4.64826809 | -5.37810800 |
| C | 6.55721775  | 3.42368394 | -2.23322430 |
| C | 5.23240494  | 5.39277348 | -1.58765645 |
| C | 1.47471591  | 1.50251708 | -6.80348596 |
| C | 0.14990311  | 3.47160662 | -6.15791812 |
| C | 5.84902969  | 0.68612785 | -4.70689675 |
| C | 1.87459152  | 6.59339608 | -2.77019334 |

|   |             |             |             |
|---|-------------|-------------|-------------|
| C | 4.83252934  | 0.30189448  | -5.62094907 |
| C | 0.85809117  | 6.20916271  | -3.68424566 |
| H | 7.33748910  | 3.71862362  | -1.53159262 |
| H | 6.01267630  | 5.68771316  | -0.88602478 |
| H | 0.69444456  | 1.20757740  | -7.50511764 |
| H | -0.63036825 | 3.17666694  | -6.85954979 |
| H | 6.74763235  | 0.07785552  | -4.60385166 |
| H | 4.95086055  | -0.60131756 | -6.21953573 |
| H | 1.75626030  | 7.49660812  | -2.17160669 |
| H | -0.04051149 | 6.81743505  | -3.78729076 |
| H | 7.60997651  | 1.63875035  | -2.90998922 |
| H | 2.76370358  | -0.19312286 | -7.26783032 |
| H | 3.94341727  | 7.08841342  | -1.12331209 |
| H | -0.90285566 | 5.25654021  | -5.48115319 |
| C | -2.19245048 | -4.69320902 | 6.11913214  |
| C | -3.58992323 | -2.56165673 | 4.86647325  |
| C | -1.56190808 | -3.93373216 | 5.09834260  |
| C | -3.52172925 | -4.38690973 | 6.51359223  |
| C | -2.26064446 | -2.86795602 | 4.47201316  |
| C | -4.22046563 | -3.32113359 | 5.88726278  |
| C | -1.49371410 | -5.75898516 | 6.74546158  |
| C | -0.23262931 | -4.24003145 | 4.70388251  |
| C | -4.15227165 | -5.14638658 | 7.53438176  |
| C | -4.28865961 | -1.49588059 | 4.24014381  |
| C | -1.63010206 | -2.10847917 | 3.45122363  |
| C | -5.54974441 | -3.01483430 | 6.28172287  |
| C | 0.46610707  | -5.30580759 | 5.33021196  |

|   |             |             |             |
|---|-------------|-------------|-------------|
| C | -3.45353528 | -6.21216272 | 8.16071121  |
| C | -2.32883844 | -1.04270303 | 2.82489418  |
| C | -6.24848078 | -1.94905816 | 5.65539343  |
| C | -0.16443530 | -6.06528449 | 6.35100152  |
| C | -2.12425647 | -6.51846205 | 7.76625114  |
| C | -3.65811724 | -0.73640370 | 3.21935425  |
| C | -5.61793841 | -1.18958126 | 4.63460387  |
| C | 0.39791290  | -3.48055464 | 3.68309312  |
| C | -5.48155024 | -4.84008725 | 7.92884171  |
| C | -0.30082348 | -2.41477850 | 3.05676367  |
| C | -6.18028661 | -3.77431111 | 7.30251227  |
| H | 0.37191865  | -6.88338022 | 6.83177550  |
| H | -1.58790252 | -7.33655778 | 8.24702513  |
| H | -4.19447120 | 0.08169203  | 2.73858026  |
| H | -6.15429237 | -0.37148553 | 4.15382989  |
| H | 1.41827487  | -3.71567171 | 3.38030329  |
| H | 0.18318448  | -1.83179975 | 2.27319981  |
| H | -5.96555819 | -5.42306600 | 8.71240558  |
| H | -7.20064858 | -3.53919404 | 7.60530210  |
| H | 1.48646888  | -5.54092475 | 5.02742229  |
| H | -1.84483070 | -0.45972428 | 2.04133043  |
| H | -3.93754301 | -6.79514147 | 8.94427496  |
| H | -7.26884259 | -1.71394100 | 5.95818310  |
| C | 1.00085642  | 0.78235560  | -2.61479402 |
| C | 1.99661597  | 2.58474051  | -0.65891287 |
| C | 2.26374496  | 0.54684619  | -2.00977506 |
| C | 0.23584766  | 1.91905747  | -2.24187240 |

|   |             |             |             |
|---|-------------|-------------|-------------|
| C | 2.76162473  | 1.44803864  | -1.03183449 |
| C | 0.73372744  | 2.82024992  | -1.26393182 |
| C | 0.50297664  | -0.11883685 | -3.59273459 |
| C | 3.02875371  | -0.58985568 | -2.38269669 |
| C | -1.02704088 | 2.15456689  | -2.84689135 |
| C | 2.49449575  | 3.48593296  | 0.31902771  |
| C | 4.02451327  | 1.21252922  | -0.42681553 |
| C | -0.03128132 | 3.95695179  | -0.89101020 |
| C | 2.53087394  | -1.49104814 | -3.36063726 |
| C | -1.52492065 | 1.25337444  | -3.82483193 |
| C | 4.52239305  | 2.11372167  | 0.55112504  |
| C | 0.46659845  | 4.85814424  | 0.08693037  |
| C | 1.26798538  | -1.25553876 | -3.96565626 |
| C | -0.75991192 | 0.11667253  | -4.19775359 |
| C | 3.75738431  | 3.25042358  | 0.92404670  |
| C | 1.72948701  | 4.62263487  | 0.69194937  |
| C | 4.29164205  | -0.82536497 | -1.77767775 |
| C | -1.79204944 | 3.29126862  | -2.47396971 |
| C | 4.78952183  | 0.07582749  | -0.79973718 |
| C | -1.29416966 | 4.19246108  | -1.49602913 |
| H | 0.88581008  | -1.94729913 | -4.71632892 |
| H | -1.14208722 | -0.57508784 | -4.94842625 |
| H | 4.13955961  | 3.94218395  | 1.67471936  |
| H | 2.11166231  | 5.31439524  | 1.44262203  |
| H | 4.87886716  | -1.69790380 | -2.06393450 |
| H | 5.75892228  | -0.10495090 | -0.33532119 |
| H | -2.76144989 | 3.47204701  | -2.93838570 |

|   |             |             |             |
|---|-------------|-------------|-------------|
| H | -1.88139476 | 5.06499991  | -1.20977238 |
| H | 3.11809882  | -2.36358687 | -3.64689408 |
| H | 5.49179332  | 1.93294346  | 1.01554105  |
| H | -2.49432092 | 1.43415265  | -4.28924794 |
| H | -0.12062643 | 5.73068298  | 0.37318719  |
| C | -2.16825881 | -3.43143312 | 0.30129040  |
| C | -3.54343731 | -5.16741312 | 2.07917032  |
| C | -3.52647512 | -3.17989017 | 0.63049347  |
| C | -1.49763175 | -4.55096607 | 0.86102729  |
| C | -4.21406438 | -4.04788017 | 1.51943343  |
| C | -2.18522100 | -5.41895607 | 1.74996725  |
| C | -1.48066956 | -2.56344312 | -0.58764957 |
| C | -4.19710219 | -2.06035722 | 0.07075657  |
| C | -0.13941543 | -4.80250902 | 0.53182422  |
| C | -4.23102657 | -6.03540312 | 2.96811029  |
| C | -5.57228069 | -3.79633722 | 1.84863650  |
| C | -1.51459394 | -6.53848903 | 2.30970415  |
| C | -3.50951293 | -1.19236722 | -0.81818339 |
| C | 0.54817382  | -3.93451902 | -0.35711574 |
| C | -6.25986994 | -4.66432722 | 2.73757646  |
| C | -2.20218319 | -7.40647903 | 3.19864411  |
| C | -2.15129659 | -1.44391013 | -1.14738650 |
| C | -0.12245321 | -2.81498604 | -0.91685267 |
| C | -5.58924291 | -5.78386021 | 3.29731339  |
| C | -3.56039953 | -7.15493611 | 3.52784722  |
| C | -5.55531830 | -1.80881440 | 0.39995967  |
| C | 0.53121143  | -5.92204184 | 1.09156109  |

|   |             |             |             |
|---|-------------|-------------|-------------|
| C | -6.24290756 | -2.67680440 | 1.28889963  |
| C | -0.15637782 | -6.79003184 | 1.98050105  |
| H | -1.62349923 | -0.77763615 | -1.82974179 |
| H | 0.40534415  | -2.14871205 | -1.59920796 |
| H | -6.11704027 | -6.45013419 | 3.97966868  |
| H | -4.08819689 | -7.82121009 | 4.21020251  |
| H | -6.07009548 | -0.94945452 | -0.02969756 |
| H | -7.28548215 | -2.48371858 | 1.54159777  |
| H | 1.57378602  | -6.11512766 | 0.83886295  |
| H | 0.35839936  | -7.64939172 | 2.41015828  |
| H | -4.02428988 | -0.33300744 | -1.24784063 |
| H | -7.30244437 | -4.47124157 | 2.99027467  |
| H | 1.59074824  | -4.12760468 | -0.60981394 |
| H | -1.68740624 | -8.26583880 | 3.62830135  |
| C | 0.80769980  | -0.37831703 | 5.38929536  |
| C | -1.78273453 | 0.35281928  | 6.29521433  |
| C | 0.24610919  | -1.01825840 | 6.52573326  |
| C | 0.07407324  | 0.62719249  | 4.70581694  |
| C | -1.04910798 | -0.65269025 | 6.97869274  |
| C | -1.22114392 | 0.99276065  | 5.15877642  |
| C | 2.10291696  | -0.74388519 | 4.93633587  |
| C | 0.97973574  | -2.02376793 | 7.20921167  |
| C | 0.63566385  | 1.26713387  | 3.56937904  |
| C | -3.07795170 | 0.71838743  | 6.74817381  |
| C | -1.61069859 | -1.29263162 | 8.11513064  |
| C | -1.95477048 | 1.99827018  | 4.47529801  |
| C | 2.27495291  | -2.38933609 | 6.75625219  |

|   |             |             |            |
|---|-------------|-------------|------------|
| C | 1.93088102  | 0.90156571  | 3.11641955 |
| C | -2.90591575 | -0.92706347 | 8.56809013 |
| C | -3.24998764 | 2.36383833  | 4.92825749 |
| C | 2.83654357  | -1.74939473 | 5.61981427 |
| C | 2.66450763  | -0.10394383 | 3.79989795 |
| C | -3.63954236 | 0.07844608  | 7.88461173 |
| C | -3.81157831 | 1.72389697  | 6.06469541 |
| C | 0.41814512  | -2.66370914 | 8.34564940 |
| C | -0.09796269 | 2.27264323  | 2.88590080 |
| C | -0.87707205 | -2.29814099 | 8.79860888 |
| C | -1.39317985 | 2.63821139  | 3.33886028 |
| H | 3.83075952  | -2.03000689 | 5.27212003 |
| H | 3.65872358  | -0.38455599 | 3.45220371 |
| H | -4.63375831 | 0.35905824  | 8.23230597 |
| H | -4.80579425 | 2.00450914  | 6.41238965 |
| H | 0.98128103  | -3.43554399 | 8.87029134 |
| H | -1.30815219 | -2.78936365 | 9.67094510 |
| H | 0.33311745  | 2.76386589  | 2.01356458 |
| H | -1.95631577 | 3.41004624  | 2.81421834 |
| H | 2.83808886  | -3.16117079 | 7.28089394 |
| H | -3.33699597 | -1.41828595 | 9.44042619 |
| H | 2.36196123  | 1.39278819  | 2.24408349 |
| H | -3.81312360 | 3.13567304  | 4.40361575 |
| K | 0.20465800  | 0.10074000  | 0.48149700 |

217

n = 6, Energy = -635.129273609796 (23.4)

|   |             |            |            |
|---|-------------|------------|------------|
| C | -1.15811529 | 0.64591154 | 3.37445729 |
|---|-------------|------------|------------|



|   |             |             |            |
|---|-------------|-------------|------------|
| C | -1.93246558 | -1.96340818 | 4.18527890 |
| C | -0.59350572 | 0.06853684  | 4.54247037 |
| C | -2.10990001 | -0.08137361 | 2.61185502 |
| C | -0.98068086 | -1.23612303 | 4.94788118 |
| C | -2.49707516 | -1.38603347 | 3.01726582 |
| C | -0.77094014 | 1.95057141  | 2.96904648 |
| C | 0.35827901  | 0.79582199  | 5.30507264 |
| C | -2.67450958 | 0.49600110  | 1.44384194 |
| C | -2.31964073 | -3.26806805 | 4.59068971 |
| C | -0.41607129 | -1.81349773 | 6.11589426 |
| C | -3.44885988 | -2.11331863 | 2.25466355 |
| C | 0.74545415  | 2.10048186  | 4.89966183 |
| C | -2.28733443 | 1.80066096  | 1.03843113 |
| C | -0.80324644 | -3.11815760 | 6.52130506 |
| C | -3.83603503 | -3.41797849 | 2.66007436 |
| C | 0.18084460  | 2.67785662  | 3.73164874 |
| C | -1.33554969 | 2.52794617  | 1.80103338 |
| C | -1.75503118 | -3.84544281 | 5.75870281 |
| C | -3.27142547 | -3.99535326 | 3.82808746 |
| C | 0.92288843  | 0.21844727  | 6.47308553 |
| C | -3.62629415 | -0.23128404 | 0.68123985 |
| C | 0.53571328  | -1.08621259 | 6.87849634 |
| C | -4.01346930 | -1.53594391 | 1.08665066 |
| H | 0.47804241  | 3.67932083  | 3.42045313 |
| H | -1.03835188 | 3.52941038  | 1.48983778 |
| H | -2.05222899 | -4.84690702 | 6.06989841 |
| H | -3.56862328 | -4.99681747 | 4.13928306 |

|   |             |             |             |
|---|-------------|-------------|-------------|
| H | 1.65348381  | 0.77671549  | 7.05846340  |
| H | 0.96911082  | -1.52940870 | 7.77506985  |
| H | -4.05969169 | 0.21191206  | -0.21533365 |
| H | -4.74406468 | -2.09421213 | 0.50127279  |
| H | 1.47604940  | 2.65875011  | 5.48503949  |
| H | -0.36984907 | -3.56135377 | 7.41787840  |
| H | -2.72073181 | 2.24385713  | 0.14185779  |
| H | -4.56663028 | -3.97624675 | 2.07469670  |
| C | -2.20541409 | 1.53549156  | -2.67048210 |
| C | -0.99568508 | 3.85621138  | -1.56757016 |
| C | -0.82316204 | 1.52928940  | -2.34530385 |
| C | -2.98280163 | 2.70205363  | -2.44420437 |
| C | -0.21829754 | 2.68964931  | -1.79384788 |
| C | -2.37793713 | 3.86241355  | -1.89274840 |
| C | -2.81027859 | 0.37513165  | -3.22193807 |
| C | -0.04577450 | 0.36272732  | -2.57158158 |
| C | -4.36505368 | 2.70825580  | -2.76938262 |
| C | -0.39082058 | 5.01657130  | -1.01611419 |
| C | 1.16395451  | 2.68344715  | -1.46866964 |
| C | -3.15532467 | 5.02897562  | -1.66647068 |
| C | -0.65063900 | -0.79763259 | -3.12303755 |
| C | -4.96991818 | 1.54789588  | -3.32083859 |
| C | 1.76881901  | 3.84380706  | -0.91721367 |
| C | -2.55046017 | 6.18933553  | -1.11501471 |
| C | -2.03289107 | -0.79143048 | -3.44821581 |
| C | -4.19253066 | 0.38133376  | -3.54711633 |
| C | 0.99143149  | 5.01036918  | -0.69093592 |

|   |             |             |             |
|---|-------------|-------------|-------------|
| C | -1.16820810 | 6.18313342  | -0.78983644 |
| C | 1.33647734  | 0.35652527  | -2.24640334 |
| C | -5.14244101 | 3.87481776  | -2.54310488 |
| C | 1.94134184  | 1.51688519  | -1.69494737 |
| C | -4.53757651 | 5.03517767  | -1.99164891 |
| H | -2.49718845 | -1.68212924 | -3.87151650 |
| H | -4.65682804 | -0.50936500 | -3.97041702 |
| H | 1.45572887  | 5.90106795  | -0.26763523 |
| H | -0.70391072 | 7.07383218  | -0.36653575 |
| H | 1.93320447  | -0.53893442 | -2.42009541 |
| H | 3.00236640  | 1.51212435  | -1.44533870 |
| H | -6.20346557 | 3.87957859  | -2.79271355 |
| H | -5.13430364 | 5.93063736  | -1.81795685 |
| H | -0.05391211 | -1.69309222 | -3.29672964 |
| H | 2.82984338  | 3.83904639  | -0.66760499 |
| H | -6.03094255 | 1.55265656  | -3.57044727 |
| H | -3.14718706 | 7.08479516  | -0.94132261 |
| C | 0.29890261  | 1.90580780  | -5.74717012 |
| C | 1.05307647  | 4.44212282  | -4.71570154 |
| C | 1.63208331  | 2.12710323  | -5.31121412 |
| C | -0.65719116 | 2.95266988  | -5.66739183 |
| C | 2.00917024  | 3.39526074  | -4.79547983 |
| C | -0.28010423 | 4.22082739  | -5.15165754 |
| C | -0.07818432 | 0.63765030  | -6.26290442 |
| C | 2.58817707  | 1.08024116  | -5.39099242 |
| C | -1.99037186 | 2.73137445  | -6.10334783 |
| C | 1.43016340  | 5.71028033  | -4.19996724 |

|   |             |             |             |
|---|-------------|-------------|-------------|
| C | 3.34235094  | 3.61655617  | -4.35952383 |
| C | -1.23619800 | 5.26768947  | -5.07187924 |
| C | 2.21109014  | -0.18791635 | -5.90672671 |
| C | -2.36745879 | 1.46321695  | -6.61908212 |
| C | 3.71943787  | 4.88471368  | -3.84378954 |
| C | -0.85911106 | 6.53584697  | -4.55614495 |
| C | 0.87790943  | -0.40921183 | -6.34268273 |
| C | -1.41136504 | 0.41635481  | -6.69886044 |
| C | 2.76334412  | 5.93157581  | -3.76401122 |
| C | 0.47406965  | 6.75714246  | -4.12018893 |
| C | 3.92135755  | 1.30153667  | -4.95503645 |
| C | -2.94646540 | 3.77823645  | -6.02356950 |
| C | 4.29844448  | 2.56969417  | -4.43930216 |
| C | -2.56937847 | 5.04639396  | -5.50783521 |
| H | 0.58845539  | -1.38265663 | -6.73856326 |
| H | -1.70081908 | -0.55708998 | -7.09474097 |
| H | 3.05279815  | 6.90502061  | -3.36813069 |
| H | 0.76352369  | 7.73058726  | -3.72430840 |
| H | 4.65526059  | 0.49795938  | -5.01627472 |
| H | 5.32180159  | 2.73956179  | -4.10465985 |
| H | -3.96982252 | 3.60836883  | -6.35821181 |
| H | -3.30328151 | 5.84997125  | -5.44659694 |
| H | 2.94499295  | -0.99149361 | -5.96796503 |
| H | 4.74279477  | 5.05458143  | -3.50914724 |
| H | -3.39081570 | 1.29334920  | -6.95372442 |
| H | -1.59301387 | 7.33942424  | -4.49490663 |
| C | -3.56432361 | 2.48047896  | 5.26148441  |

|   |             |             |            |
|---|-------------|-------------|------------|
| C | -5.43401865 | 1.53467257  | 3.34437976 |
| C | -4.16426624 | 1.20382303  | 5.42463630 |
| C | -3.89922849 | 3.28423170  | 4.13978020 |
| C | -5.09911377 | 0.73091984  | 4.46608397 |
| C | -4.83407601 | 2.81132850  | 3.18122787 |
| C | -2.62947608 | 2.95338216  | 6.22003673 |
| C | -3.82936136 | 0.40007030  | 6.54634051 |
| C | -3.29928585 | 4.56088763  | 3.97662831 |
| C | -6.36886617 | 1.06176938  | 2.38582744 |
| C | -5.69905640 | -0.54573610 | 4.62923586 |
| C | -5.16898089 | 3.61508124  | 2.05952366 |
| C | -2.89451384 | 0.87297349  | 7.50489283 |
| C | -2.36443833 | 5.03379083  | 4.93518064 |
| C | -6.63390393 | -1.01863929 | 3.67068353 |
| C | -6.10382841 | 3.14217804  | 1.10097134 |
| C | -2.29457116 | 2.14962944  | 7.34174098 |
| C | -2.02953341 | 4.23003811  | 6.05688489 |
| C | -6.96880885 | -0.21488658 | 2.54897928 |
| C | -6.70377109 | 1.86552209  | 1.26412319 |
| C | -4.42930397 | -0.87658544 | 6.70949227 |
| C | -3.63419076 | 5.36464017  | 2.85492423 |
| C | -5.36415150 | -1.34948863 | 5.75093994 |
| C | -4.56903828 | 4.89173697  | 1.89637190 |
| H | -1.57697697 | 2.51263258  | 8.07753111 |
| H | -1.31193922 | 4.59304125  | 6.79267501 |
| H | -7.68640304 | -0.57788972 | 1.81318916 |
| H | -7.42136528 | 1.50251895  | 0.52833306 |

|   |             |             |              |
|---|-------------|-------------|--------------|
| H | -4.17222909 | -1.49355063 | 7.57051881   |
| H | -5.82467088 | -2.32945701 | 5.87617628   |
| H | -3.17367138 | 6.34460854  | 2.72968789   |
| H | -4.82611317 | 5.50870217  | 1.03534536   |
| H | -2.63743889 | 0.25600851  | 8.36591929   |
| H | -7.09442332 | -1.99860749 | 3.79591970   |
| H | -1.90391893 | 6.01375902  | 4.80994447   |
| H | -6.36090336 | 3.75914302  | 0.23994488   |
| C | 2.42862214  | 1.66275198  | -9.10317115  |
| C | 3.18183044  | 4.20624461  | -8.08881321  |
| C | 1.47478681  | 2.71280598  | -9.04004554  |
| C | 3.75906162  | 1.88444430  | -8.65911779  |
| C | 1.85139096  | 3.98455229  | -8.53286657  |
| C | 4.13566577  | 3.15619061  | -8.15193882  |
| C | 2.05201799  | 0.39100567  | -9.61035012  |
| C | 0.14434734  | 2.49111367  | -9.48409891  |
| C | 4.71289695  | 0.83439030  | -8.72224340  |
| C | 3.55843459  | 5.47799092  | -7.58163424  |
| C | 0.89755564  | 5.03460629  | -8.46974096  |
| C | 5.46610525  | 3.37788292  | -7.70788546  |
| C | -0.23225681 | 1.21936736  | -9.99127788  |
| C | 4.33629280  | -0.43735601 | -9.22942237  |
| C | 1.27415979  | 6.30635261  | -7.96256199  |
| C | 5.84270940  | 4.64962923  | -7.20070648  |
| C | 0.72157850  | 0.16931330  | -10.05440351 |
| C | 3.00585330  | -0.65904838 | -9.67347576  |
| C | 2.60459928  | 6.52804497  | -7.51850861  |

|   |             |             |              |
|---|-------------|-------------|--------------|
| C | 4.88887409  | 5.69968329  | -7.13758085  |
| C | -0.80948777 | 3.54116759  | -9.42097326  |
| C | 6.04333621  | 1.05608269  | -8.27819007  |
| C | -0.43288362 | 4.81291390  | -8.91379429  |
| C | 6.41994036  | 2.32782900  | -7.77101110  |
| H | 0.43249504  | -0.80688628 | -10.44371693 |
| H | 2.71676985  | -1.63524797 | -10.06278917 |
| H | 2.89368273  | 7.50424456  | -7.12919519  |
| H | 5.17795754  | 6.67588287  | -6.74826743  |
| H | -1.83074071 | 3.37099532  | -9.76183115  |
| H | -1.16505307 | 5.61894133  | -8.86533872  |
| H | 6.77550566  | 0.25005526  | -8.32664564  |
| H | 7.44119329  | 2.49800127  | -7.43015321  |
| H | -1.25350955 | 1.04919496  | -10.33213575 |
| H | 0.54199057  | 7.11238001  | -7.91410636  |
| H | 5.06846201  | -1.24338341 | -9.27787800  |
| H | 6.86396213  | 4.81980163  | -6.85984861  |
| C | 3.02904242  | -2.93199870 | -2.21308174  |
| C | 3.11105777  | -1.64915752 | 0.31934625   |
| C | 4.05860422  | -1.99794281 | -1.92335399  |
| C | 2.04048829  | -3.22463400 | -1.23659549  |
| C | 4.09961190  | -1.35652222 | -0.65714000  |
| C | 2.08149596  | -2.58321341 | 0.02961850   |
| C | 2.98803475  | -3.57341929 | -3.47929573  |
| C | 5.04715835  | -1.70530751 | -2.89984024  |
| C | 1.01092649  | -4.15868989 | -1.52632324  |
| C | 3.15206544  | -1.00773694 | 1.58556024   |

|   |             |             |             |
|---|-------------|-------------|-------------|
| C | 5.12917370  | -0.42246634 | -0.36741225 |
| C | 1.09294183  | -2.87584871 | 1.00610475  |
| C | 5.00615068  | -2.34672810 | -4.16605423 |
| C | 0.96991881  | -4.80011047 | -2.79253724 |
| C | 5.17018137  | 0.21895425  | 0.89880174  |
| C | 1.13394951  | -2.23442813 | 2.27231874  |
| C | 3.97658888  | -3.28078401 | -4.45578203 |
| C | 1.95847294  | -4.50747520 | -3.76902354 |
| C | 4.18162724  | -0.07368102 | 1.87528804  |
| C | 2.16351131  | -1.30037221 | 2.56204654  |
| C | 6.07671996  | -0.77125174 | -2.61011242 |
| C | 0.02237255  | -4.45132507 | -0.54983706 |
| C | 6.11772764  | -0.12983115 | -1.34389843 |
| C | 0.06338023  | -3.80990448 | 0.71637693  |
| H | 3.94511116  | -3.77314205 | -5.42773498 |
| H | 1.92699522  | -4.99983323 | -4.74097648 |
| H | 4.21310496  | 0.41867701  | 2.84724099  |
| H | 2.19498903  | -0.80801418 | 3.53399949  |
| H | 6.83553976  | -0.54662320 | -3.35966882 |
| H | 6.90802516  | 0.58715547  | -1.12150177 |
| H | -0.76792497 | -5.16831169 | -0.77223372 |
| H | -0.69543957 | -4.03453302 | 1.46593333  |
| H | 5.76497028  | -2.12209971 | -4.91561062 |
| H | 5.96047870  | 0.93594078  | 1.12119852  |
| H | 0.17962149  | -5.51709701 | -3.01493401 |
| H | 0.37512991  | -2.45905652 | 3.02187513  |
| K | 0.20465800  | 0.10074000  | 0.48149700  |



n = 6, Energy = -630.337304270111 (28.2)

|   |             |             |             |
|---|-------------|-------------|-------------|
| C | -2.83926543 | 1.93310671  | 2.69495298  |
| C | -2.80441827 | 3.24199004  | 0.17479234  |
| C | -2.77064787 | 1.16994078  | 1.49943239  |
| C | -2.89045940 | 3.35071431  | 2.63039324  |
| C | -2.75322429 | 1.82438244  | 0.23935207  |
| C | -2.87303582 | 4.00515597  | 1.37031292  |
| C | -2.85668901 | 1.27866505  | 3.95503329  |
| C | -2.71945390 | -0.24766682 | 1.56399213  |
| C | -2.95907695 | 4.11388024  | 3.82591382  |
| C | -2.78699469 | 3.89643170  | -1.08528798 |
| C | -2.68460674 | 1.06121651  | -0.95616851 |
| C | -2.92422979 | 5.42276357  | 1.30575319  |
| C | -2.73687748 | -0.90210848 | 2.82407244  |
| C | -2.97650053 | 3.45943858  | 5.08599414  |
| C | -2.66718316 | 1.71565817  | -2.21624883 |
| C | -2.90680621 | 6.07720523  | 0.04567287  |
| C | -2.80549503 | -0.13894257 | 4.01959308  |
| C | -2.92530656 | 2.04183096  | 5.15055393  |
| C | -2.71837713 | 3.13326579  | -2.28080862 |
| C | -2.83818866 | 5.31403932  | -1.14984777 |
| C | -2.65083636 | -1.01083254 | 0.36847165  |
| C | -3.01027091 | 5.53148763  | 3.76135398  |
| C | -2.63341278 | -0.35639088 | -0.89160867 |
| C | -2.99284733 | 6.18592929  | 2.50127366  |
| H | -2.81886947 | -0.64129565 | 4.98683779  |

|   |             |             |             |
|---|-------------|-------------|-------------|
| H | -2.93868100 | 1.53947788  | 6.11779863  |
| H | -2.70500270 | 3.63561887  | -3.24805332 |
| H | -2.82481422 | 5.81639240  | -2.11709247 |
| H | -2.61153958 | -2.09899621 | 0.41802805  |
| H | -2.58074156 | -0.94220142 | -1.80929707 |
| H | -3.06294214 | 6.11729817  | 4.67904239  |
| H | -3.03214412 | 7.27409297  | 2.45171726  |
| H | -2.69758071 | -1.99027197 | 2.87362901  |
| H | -2.61451195 | 1.12984787  | -3.13393718 |
| H | -3.02917174 | 4.04524888  | 6.00368249  |
| H | -2.94610298 | 7.16536872  | -0.00388369 |
| C | 2.69273521  | 1.82639481  | 1.87536854  |
| C | 5.20496184  | 0.79021673  | 1.05035225  |
| C | 3.08360940  | 1.91283776  | 0.51296439  |
| C | 3.55797433  | 1.22186283  | 2.82526454  |
| C | 4.33972271  | 1.39474872  | 0.10045625  |
| C | 4.81408764  | 0.70377378  | 2.41275640  |
| C | 1.43662190  | 2.34448386  | 2.28787668  |
| C | 2.21837028  | 2.51736975  | -0.43693161 |
| C | 3.16710014  | 1.13541988  | 4.18766869  |
| C | 6.46107515  | 0.27212769  | 0.63784411  |
| C | 4.73059691  | 1.48119167  | -1.26194790 |
| C | 5.67932676  | 0.09924180  | 3.36265240  |
| C | 0.96225697  | 3.03545879  | -0.02442346 |
| C | 1.91098683  | 1.65350892  | 4.60017683  |
| C | 5.98671022  | 0.96310262  | -1.67445604 |
| C | 6.93544008  | -0.41884725 | 2.95014426  |

|   |             |             |             |
|---|-------------|-------------|-------------|
| C | 0.57138272  | 2.94901587  | 1.33798070  |
| C | 1.04574765  | 2.25804093  | 3.65028085  |
| C | 6.85194939  | 0.35857061  | -0.72456006 |
| C | 7.32631432  | -0.33240432 | 1.58774009  |
| C | 2.60924452  | 2.60381263  | -1.79933553 |
| C | 4.03233922  | 0.53088796  | 5.13756447  |
| C | 3.86535783  | 2.08572359  | -2.21184368 |
| C | 5.28845253  | 0.01279892  | 4.72505632  |
| H | -0.39281688 | 3.34670391  | 1.65462426  |
| H | 0.08154805  | 2.65572898  | 3.96692441  |
| H | 7.81614900  | -0.03911743 | -1.04120362 |
| H | 8.29051393  | -0.73009237 | 1.27109653  |
| H | 1.94508205  | 3.06785483  | -2.52848114 |
| H | 4.16539507  | 2.15207769  | -3.25763288 |
| H | 3.73230197  | 0.46453385  | 6.18335367  |
| H | 5.95261500  | -0.45124328 | 5.45420193  |
| H | 0.29809449  | 3.49950094  | -0.75356883 |
| H | 6.28674756  | 1.02945664  | -2.72024504 |
| H | 1.61094949  | 1.58715490  | 5.64596583  |
| H | 7.59960256  | -0.88288940 | 3.67928962  |
| C | -0.66443297 | -3.43632044 | -1.38287853 |
| C | -0.24150755 | -3.84945797 | 1.39489954  |
| C | -1.57841975 | -4.22490094 | -0.63510247 |
| C | 0.46101653  | -2.85430870 | -0.74176555 |
| C | -1.36695704 | -4.43146970 | 0.75378656  |
| C | 0.67247924  | -3.06087747 | 0.64712348  |
| C | -0.87589568 | -3.22975167 | -2.77176756 |

|   |             |             |             |
|---|-------------|-------------|-------------|
| C | -2.70386925 | -4.80691267 | -1.27621545 |
| C | 1.37500331  | -2.06572820 | -1.48954160 |
| C | -0.03004483 | -4.05602673 | 2.78378857  |
| C | -2.28094383 | -5.22005020 | 1.50156261  |
| C | 1.79792873  | -2.47886573 | 1.28823646  |
| C | -2.91533196 | -4.60034391 | -2.66510448 |
| C | 1.16354060  | -1.85915943 | -2.87843064 |
| C | -2.06948111 | -5.42661897 | 2.89045165  |
| C | 2.00939144  | -2.68543450 | 2.67712549  |
| C | -2.00134518 | -3.81176340 | -3.41288060 |
| C | 0.03809110  | -2.44117116 | -3.51954367 |
| C | -0.94403161 | -4.84460724 | 3.53156468  |
| C | 1.09540467  | -3.47401501 | 3.42490161  |
| C | -3.61785583 | -5.59549304 | -0.52843941 |
| C | 2.50045261  | -1.48371660 | -0.84842862 |
| C | -3.40639312 | -5.80206181 | 0.86044963  |
| C | 2.71191532  | -1.69028536 | 0.54046042  |
| H | -2.16366514 | -3.65320006 | -4.47899959 |
| H | -0.12422887 | -2.28260782 | -4.58566267 |
| H | -0.78171165 | -5.00317058 | 4.59768368  |
| H | 1.25772463  | -3.63257835 | 4.49102060  |
| H | -4.48175729 | -6.04224858 | -1.02056137 |
| H | -4.10797460 | -6.40738070 | 1.43444678  |
| H | 3.20203409  | -0.87839770 | -1.42242577 |
| H | 3.57581678  | -1.24352983 | 1.03258238  |
| H | -3.77923323 | -5.04709930 | -3.15722651 |
| H | -2.77106239 | -6.03193774 | 3.46444884  |

|   |            |             |             |
|---|------------|-------------|-------------|
| H | 1.86512187 | -1.25384066 | -3.45242783 |
| H | 2.87329271 | -2.23867910 | 3.16924752  |
| C | 2.75007717 | 5.83037673  | 1.26911123  |
| C | 5.22176945 | 4.94381124  | 0.18728943  |
| C | 3.72231060 | 5.23418664  | 2.11511336  |
| C | 3.01368988 | 5.98328408  | -0.11780180 |
| C | 4.95815674 | 4.79090389  | 1.57420246  |
| C | 4.24953602 | 5.54000133  | -0.65871270 |
| C | 1.51423103 | 6.27365948  | 1.81002214  |
| C | 3.45869789 | 5.08127929  | 3.50202640  |
| C | 2.04145645 | 6.57947418  | -0.96380393 |
| C | 6.45761559 | 4.50052849  | -0.35362147 |
| C | 5.93039017 | 4.19471379  | 2.42020459  |
| C | 4.51314873 | 5.69290868  | -2.04562573 |
| C | 2.22285176 | 5.52456204  | 4.04293730  |
| C | 0.80561031 | 7.02275692  | -0.42289303 |
| C | 7.16623631 | 3.75143104  | 1.87929369  |
| C | 5.74899487 | 5.24962593  | -2.58653664 |
| C | 1.25061827 | 6.12075216  | 3.19693519  |
| C | 0.54199755 | 6.86984960  | 0.96402003  |
| C | 7.42984907 | 3.90433837  | 0.49238063  |
| C | 6.72122835 | 4.65343581  | -1.74053453 |
| C | 4.43093126 | 4.48508927  | 4.34802831  |
| C | 2.30506923 | 6.73238145  | -2.35071674 |
| C | 5.66677739 | 4.04180652  | 3.80711741  |
| C | 3.54091537 | 6.28909870  | -2.89162765 |
| H | 0.30197586 | 6.46101847  | 3.61214143  |

|   |             |             |             |
|---|-------------|-------------|-------------|
| H | -0.40664486 | 7.21011592  | 1.37922627  |
| H | 8.37849148  | 3.56407205  | 0.07717440  |
| H | 7.66987076  | 4.31316949  | -2.15574076 |
| H | 4.22858065  | 4.36771671  | 5.41263067  |
| H | 6.41306931  | 3.58416760  | 4.45651348  |
| H | 1.55877731  | 7.19002036  | -3.00011282 |
| H | 3.74326597  | 6.40647126  | -3.95623000 |
| H | 2.02050103  | 5.40718957  | 5.10753946  |
| H | 7.91252821  | 3.29379218  | 2.52868953  |
| H | 0.05931842  | 7.48039579  | -1.07228886 |
| H | 5.95134559  | 5.36699840  | -3.65113880 |
| C | 2.45820935  | -0.74191727 | -6.86408888 |
| C | 0.49569322  | 1.20230964  | -6.20521738 |
| C | 2.85601380  | 0.56138300  | -6.46463915 |
| C | 1.07914684  | -1.07310409 | -6.93410287 |
| C | 1.87475573  | 1.53349646  | -6.13520340 |
| C | 0.09788877  | -0.10099064 | -6.60466712 |
| C | 3.43946742  | -1.71403073 | -7.19352463 |
| C | 4.23507631  | 0.89256982  | -6.39462517 |
| C | 0.68134239  | -2.37640437 | -7.33355260 |
| C | -0.48556485 | 2.17442310  | -5.87578163 |
| C | 2.27256018  | 2.83679674  | -5.73575367 |
| C | -1.28117374 | -0.43217745 | -6.67468110 |
| C | 5.21633437  | -0.07954363 | -6.72406092 |
| C | 1.66260046  | -3.34851783 | -7.66298835 |
| C | 1.29130211  | 3.80891019  | -5.40631792 |
| C | -2.26243180 | 0.53993600  | -6.34524535 |

|   |             |             |             |
|---|-------------|-------------|-------------|
| C | 4.81852997  | -1.38284395 | -7.12351066 |
| C | 3.04166301  | -3.01733105 | -7.59297438 |
| C | -0.08776044 | 3.47772342  | -5.47633189 |
| C | -1.86462740 | 1.84323632  | -5.94579560 |
| C | 4.63288058  | 2.19586994  | -5.99517548 |
| C | -0.69771994 | -2.70759103 | -7.40356653 |
| C | 3.65162252  | 3.16798340  | -5.66573973 |
| C | -1.67897801 | -1.73547757 | -7.07413078 |
| H | 5.57174915  | -2.12904368 | -7.37638739 |
| H | 3.79488220  | -3.76353078 | -7.84585110 |
| H | -0.84097962 | 4.22392315  | -5.22345516 |
| H | -2.61784658 | 2.58943605  | -5.69291888 |
| H | 5.69145683  | 2.45009085  | -5.94143234 |
| H | 3.95697950  | 4.16840412  | -5.35911984 |
| H | -1.00307692 | -3.70801175 | -7.71018642 |
| H | -2.73755425 | -1.98969848 | -7.12787392 |
| H | 6.27491049  | 0.17467708  | -6.67031784 |
| H | 1.59665888  | 4.80933080  | -5.09969806 |
| H | 1.35724369  | -4.34893843 | -7.96960821 |
| H | -3.32100792 | 0.28571529  | -6.39898843 |
| C | 4.23410876  | -4.72169567 | -0.18759637 |
| C | 1.91595737  | -6.20676196 | -0.88498562 |
| C | 3.55135769  | -5.47814003 | 0.80136419  |
| C | 3.75778413  | -4.70778445 | -1.52525156 |
| C | 2.39228200  | -6.22067318 | 0.45266957  |
| C | 2.59870843  | -5.45031760 | -1.87394618 |
| C | 5.39318445  | -3.97916252 | 0.16109826  |

|   |             |             |             |
|---|-------------|-------------|-------------|
| C | 4.02768232  | -5.49205124 | 2.13901938  |
| C | 4.44053519  | -3.95134009 | -2.51421212 |
| C | 0.75688168  | -6.94929511 | -1.23368025 |
| C | 1.70953094  | -6.97711754 | 1.44163013  |
| C | 2.12238381  | -5.43640639 | -3.21160137 |
| C | 5.18675801  | -4.74951809 | 2.48771401  |
| C | 5.59961088  | -3.20880695 | -2.16551749 |
| C | 0.55045524  | -7.71965068 | 1.09293550  |
| C | 0.96330811  | -6.17893954 | -3.56029600 |
| C | 5.86950912  | -3.99307370 | 1.49875346  |
| C | 6.07593556  | -3.22271813 | -0.82786229 |
| C | 0.07413057  | -7.70573950 | -0.24471970 |
| C | 0.28055700  | -6.93538393 | -2.57133545 |
| C | 3.34493128  | -6.24849553 | 3.12797972  |
| C | 3.96421054  | -3.93742895 | -3.85186708 |
| C | 2.18585559  | -6.99102868 | 2.77928509  |
| C | 2.80513485  | -4.67996210 | -4.20056171 |
| H | 6.75922211  | -3.42310110 | 1.76641341  |
| H | 6.96564855  | -2.65274553 | -0.56020234 |
| H | -0.81558242 | -8.27571210 | -0.51237965 |
| H | -0.60915599 | -7.50535653 | -2.83899540 |
| H | 3.71056076  | -6.25917387 | 4.15477147  |
| H | 1.66177199  | -7.57167968 | 3.53841687  |
| H | 4.48829414  | -3.35677795 | -4.61099886 |
| H | 2.43950536  | -4.66928376 | -5.22735347 |
| H | 5.55238757  | -4.76019633 | 3.51450555  |
| H | 0.02637162  | -8.30030164 | 1.85206704  |



|   |            |             |             |
|---|------------|-------------|-------------|
| H | 6.12369451 | -2.62815599 | -2.92464903 |
| H | 0.59767856 | -6.16826130 | -4.58708755 |
| K | 0.20465800 | 0.10074000  | 0.48149700  |

217

n = 6, Energy = -627.006314302353 (31.6)

|   |             |             |             |
|---|-------------|-------------|-------------|
| C | -2.50120691 | -5.13441043 | -2.56375280 |
| C | -2.65766350 | -5.79419457 | 0.19410973  |
| C | -3.64413114 | -4.76127378 | -1.80817798 |
| C | -1.43651097 | -5.83743914 | -1.94039636 |
| C | -3.72235944 | -5.09116585 | -0.42924672 |
| C | -1.51473927 | -6.16733121 | -0.56146509 |
| C | -2.42297861 | -4.80451836 | -3.94268407 |
| C | -4.70882708 | -4.05824507 | -2.43153443 |
| C | -0.29358673 | -6.21057579 | -2.69597117 |
| C | -2.73589180 | -6.12408664 | 1.57304099  |
| C | -4.86528368 | -4.71802920 | 0.32632810  |
| C | -0.45004333 | -6.87035993 | 0.06189136  |
| C | -4.63059878 | -3.72835300 | -3.81046570 |
| C | -0.21535843 | -5.88068372 | -4.07490244 |
| C | -4.94351198 | -5.04792127 | 1.70525936  |
| C | -0.52827163 | -7.20025200 | 1.44082262  |
| C | -3.48767454 | -4.10148963 | -4.56604057 |
| C | -1.28005437 | -5.17765499 | -4.69825894 |
| C | -3.87881604 | -5.75095000 | 2.32861587  |
| C | -1.67119587 | -6.82711537 | 2.19639750  |
| C | -5.85175111 | -3.68510852 | -1.67595962 |
| C | 0.77110900  | -6.91360440 | -2.07261471 |

|   |             |             |             |
|---|-------------|-------------|-------------|
| C | -5.92997941 | -4.01500059 | -0.29702836 |
| C | 0.69288070  | -7.24349647 | -0.69368345 |
| H | -3.42762606 | -3.84826263 | -5.62451593 |
| H | -1.22000589 | -4.92442799 | -5.75673430 |
| H | -3.93886452 | -6.00417700 | 3.38709123  |
| H | -1.73124435 | -7.08034236 | 3.25487285  |
| H | -6.66901779 | -3.14545967 | -2.15445157 |
| H | -6.80729458 | -3.72857877 | 0.28295517  |
| H | 1.64842417  | -7.20002623 | -2.65259824 |
| H | 1.51014738  | -7.78314532 | -0.21519150 |
| H | -5.44786525 | -3.18870423 | -4.28895771 |
| H | -5.82082694 | -4.76149957 | 2.28524293  |
| H | 0.66195653  | -6.16710543 | -4.65488601 |
| H | 0.28899484  | -7.73990076 | 1.91931464  |
| C | -2.82931438 | 5.09071593  | 3.41195326  |
| C | -1.20692361 | 3.80748874  | 5.35791721  |
| C | -1.51828736 | 5.57053811  | 3.67152777  |
| C | -3.32914601 | 3.96928015  | 4.12536073  |
| C | -0.70709198 | 4.92892452  | 4.64450974  |
| C | -2.51795062 | 3.32766656  | 5.09834271  |
| C | -3.64050976 | 5.73232953  | 2.43897129  |
| C | -1.01845574 | 6.69197389  | 2.95812030  |
| C | -4.64017302 | 3.48945797  | 3.86578623  |
| C | -0.39572822 | 3.16587514  | 6.33089919  |
| C | 0.60393503  | 5.40874670  | 4.90408425  |
| C | -3.01778225 | 2.20623078  | 5.81175018  |
| C | -1.82965112 | 7.33358748  | 1.98513833  |

|   |             |             |             |
|---|-------------|-------------|-------------|
| C | -5.45136840 | 4.13107157  | 2.89280426  |
| C | 1.41513042  | 4.76713310  | 5.87706622  |
| C | -2.20658687 | 1.56461719  | 6.78473215  |
| C | -3.14067817 | 6.85376533  | 1.72556378  |
| C | -4.95153681 | 5.25250737  | 2.17939675  |
| C | 0.91529882  | 3.64569730  | 6.59047373  |
| C | -0.89555982 | 2.04443934  | 7.04430670  |
| C | 0.29257110  | 7.17179592  | 3.21769485  |
| C | -5.14000447 | 2.36802235  | 4.57919366  |
| C | 1.10376649  | 6.53018232  | 4.19067682  |
| C | -4.32880909 | 1.72640875  | 5.55217563  |
| H | -3.76335628 | 7.34627152  | 0.97869737  |
| H | -5.57421492 | 5.74501356  | 1.43253034  |
| H | 1.53797694  | 3.15319111  | 7.33734014  |
| H | -0.27288170 | 1.55193315  | 7.79117310  |
| H | 0.67624473  | 8.03261641  | 2.67007921  |
| H | 2.11011830  | 6.89849658  | 4.38992768  |
| H | -6.14635628 | 1.99970809  | 4.37994280  |
| H | -4.71248271 | 0.86558826  | 6.09979126  |
| H | -1.44597770 | 8.19440785  | 1.43752270  |
| H | 2.42148209  | 5.13544718  | 6.07631716  |
| H | -6.45772007 | 3.76275749  | 2.69355331  |
| H | -2.59026028 | 0.70379682  | 7.33234778  |
| C | -3.14735630 | -1.32227413 | -0.29425838 |
| C | -2.24547777 | -2.44380589 | 2.15408415  |
| C | -3.95696922 | -1.23213406 | 0.86884168  |
| C | -1.88680411 | -1.97318008 | -0.23318718 |

|   |             |             |             |
|---|-------------|-------------|-------------|
| C | -3.50602996 | -1.79289994 | 2.09301295  |
| C | -1.43586484 | -2.53394596 | 0.99098408  |
| C | -3.59829556 | -0.76150825 | -1.51842964 |
| C | -5.21752141 | -0.58122811 | 0.80777048  |
| C | -1.07719118 | -2.06332015 | -1.39628724 |
| C | -1.79453850 | -3.00457177 | 3.37825541  |
| C | -4.31564288 | -1.70275987 | 3.25611301  |
| C | -0.17531265 | -3.18485191 | 1.05205529  |
| C | -5.66846068 | -0.02046222 | -0.41640078 |
| C | -1.52813045 | -1.50255427 | -2.62045851 |
| C | -3.86470362 | -2.26352575 | 4.48028427  |
| C | 0.27562662  | -3.74561780 | 2.27622655  |
| C | -4.85884777 | -0.11060227 | -1.57950090 |
| C | -2.78868266 | -0.85164829 | -2.68152976 |
| C | -2.60415141 | -2.91443173 | 4.54135552  |
| C | -0.53398629 | -3.65547775 | 3.43932666  |
| C | -6.02713414 | -0.49108811 | 1.97087044  |
| C | 0.18336081  | -2.71422603 | -1.33521593 |
| C | -5.57619487 | -1.05185399 | 3.19504170  |
| C | 0.63430008  | -3.27499191 | -0.11104467 |
| H | -5.20499128 | 0.31984476  | -2.51918161 |
| H | -3.13482616 | -0.42120126 | -3.62121047 |
| H | -2.25800790 | -3.34487876 | 5.48103624  |
| H | -0.18784279 | -4.08592478 | 4.37900738  |
| H | -6.99474119 | 0.00855101  | 1.92399185  |
| H | -6.19765839 | -0.98266195 | 4.08784393  |
| H | 0.80482432  | -2.78341807 | -2.22801817 |

|   |             |             |             |
|---|-------------|-------------|-------------|
| H | 1.60190713  | -3.77463103 | -0.06416609 |
| H | -6.63606755 | 0.47917685  | -0.46327953 |
| H | -4.48616691 | -2.19433381 | 5.37308645  |
| H | -0.90666715 | -1.57174621 | -3.51326068 |
| H | 1.24323349  | -4.24525687 | 2.32310529  |
| C | 5.06803083  | -1.57343980 | -3.18391335 |
| C | 4.60671955  | 0.70363574  | -4.81722851 |
| C | 3.92283857  | -1.52098163 | -4.02187689 |
| C | 5.98256745  | -0.48736020 | -3.16260738 |
| C | 3.69218293  | -0.38244386 | -4.83853448 |
| C | 5.75191181  | 0.65117757  | -3.97926497 |
| C | 5.29868646  | -2.71197756 | -2.36725576 |
| C | 3.00830194  | -2.60706123 | -4.04318286 |
| C | 7.12775971  | -0.53981836 | -2.32464384 |
| C | 4.37606391  | 1.84217350  | -5.63388609 |
| C | 2.54699067  | -0.32998570 | -5.67649802 |
| C | 6.66644843  | 1.73725717  | -3.95795900 |
| C | 3.23895758  | -3.74559900 | -3.22652527 |
| C | 7.35841535  | -1.67835613 | -1.50798625 |
| C | 2.31633503  | 0.80855207  | -6.49315560 |
| C | 6.43579279  | 2.87579494  | -4.77461658 |
| C | 4.38414985  | -3.79805721 | -2.38856169 |
| C | 6.44387873  | -2.76443578 | -1.52929218 |
| C | 3.23087164  | 1.89463172  | -6.47184967 |
| C | 5.29060052  | 2.92825315  | -5.61258016 |
| C | 1.86310988  | -2.55460297 | -4.88114632 |
| C | 8.04229613  | 0.54626114  | -2.30333796 |

|   |             |             |             |
|---|-------------|-------------|-------------|
| C | 1.63245425  | -1.41606520 | -5.69780390 |
| C | 7.81164049  | 1.68479891  | -3.11999554 |
| H | 4.56120241  | -4.67200518 | -1.76169076 |
| H | 6.62093129  | -3.63838374 | -0.90242125 |
| H | 3.05381908  | 2.76857968  | -7.09872061 |
| H | 5.11354796  | 3.80220112  | -6.23945110 |
| H | 1.16110635  | -3.38828385 | -4.89750091 |
| H | 0.75339813  | -1.37579803 | -6.34102949 |
| H | 8.92135225  | 0.50599397  | -1.66011236 |
| H | 8.51364403  | 2.51847979  | -3.10364095 |
| H | 2.53695425  | -4.57927983 | -3.24287975 |
| H | 1.43727910  | 0.84881939  | -7.13638115 |
| H | 8.23747127  | -1.71862345 | -0.86476071 |
| H | 7.13779612  | 3.70947577  | -4.75826211 |
| C | 1.57289973  | 4.42798980  | 1.07764174  |
| C | 0.59441363  | 2.25236843  | 2.61869208  |
| C | 0.24455850  | 3.96364812  | 0.88712543  |
| C | 2.41199791  | 3.80452079  | 2.03868322  |
| C | -0.24468455 | 2.87583743  | 1.65765059  |
| C | 1.92275486  | 2.71671011  | 2.80920839  |
| C | 2.06214278  | 5.51580048  | 0.30711657  |
| C | -0.59453967 | 4.58711712  | -0.07391606 |
| C | 3.74033913  | 4.26886247  | 2.22919954  |
| C | 0.10517058  | 1.16455775  | 3.38921724  |
| C | -1.57302577 | 2.41149575  | 1.46713428  |
| C | 2.76185303  | 2.09324111  | 3.77024987  |
| C | -0.10529662 | 5.67492780  | -0.84444122 |

|   |             |             |             |
|---|-------------|-------------|-------------|
| C | 4.22958218  | 5.35667316  | 1.45867437  |
| C | -2.06226882 | 1.32368507  | 2.23765945  |
| C | 2.27260998  | 1.00543043  | 4.54077504  |
| C | 1.22304463  | 6.13926953  | -0.65392494 |
| C | 3.39048403  | 5.98014220  | 0.49763286  |
| C | -1.22317067 | 0.70021602  | 3.19870096  |
| C | 0.94426873  | 0.54108870  | 4.35025876  |
| C | -1.92288069 | 4.12277542  | -0.26443226 |
| C | 4.57943710  | 3.64539349  | 3.19024091  |
| C | -2.41212374 | 3.03496474  | 0.50609291  |
| C | 4.09019405  | 2.55758280  | 3.96076608  |
| H | 1.59859033  | 6.97427910  | -1.24538437 |
| H | 3.76602973  | 6.81515177  | -0.09382657 |
| H | -1.59871637 | -0.13479355 | 3.79016039  |
| H | 0.56872303  | -0.29392087 | 4.94171819  |
| H | -2.56697725 | 4.60135377  | -1.00213318 |
| H | -3.43176604 | 2.67853343  | 0.35985148  |
| H | 5.59907940  | 4.00182480  | 3.33648233  |
| H | 4.73429061  | 2.07900445  | 4.69846700  |
| H | -0.74939295 | 6.15350618  | -1.58214206 |
| H | -3.08191094 | 0.96725370  | 2.09141817  |
| H | 5.24922430  | 5.71310453  | 1.60491565  |
| H | 2.91670631  | 0.52685204  | 5.27847588  |
| C | 4.22086080  | 4.11290946  | -2.25877688 |
| C | 4.81323702  | 1.90599367  | -0.57229752 |
| C | 5.38656959  | 4.13162471  | -1.44811491 |
| C | 3.35134012  | 2.99073632  | -2.22619918 |

|   |            |             |             |
|---|------------|-------------|-------------|
| C | 5.68275770 | 3.02816681  | -0.60487523 |
| C | 3.64752823 | 1.88727843  | -1.38295950 |
| C | 3.92467269 | 5.21636735  | -3.10201657 |
| C | 6.25609027 | 5.25379785  | -1.48069262 |
| C | 2.18563133 | 2.97202107  | -3.03686115 |
| C | 5.10942513 | 0.80253578  | 0.27094216  |
| C | 6.84846649 | 3.04688206  | 0.20578674  |
| C | 2.77800755 | 0.76510529  | -1.35038179 |
| C | 5.95990216 | 6.35725574  | -2.32393230 |
| C | 1.88944322 | 4.07547897  | -3.88010083 |
| C | 7.14465459 | 1.94342417  | 1.04902642  |
| C | 3.07419566 | -0.33835261 | -0.50714211 |
| C | 4.79419336 | 6.33854054  | -3.13459431 |
| C | 2.75896389 | 5.19765215  | -3.91267857 |
| C | 6.27513393 | 0.82125098  | 1.08160417  |
| C | 4.23990446 | -0.31963741 | 0.30351990  |
| C | 7.42179886 | 5.27251298  | -0.67003072 |
| C | 1.31611085 | 1.84984804  | -3.00428337 |
| C | 7.71798697 | 4.16905509  | 0.17320896  |
| C | 1.61229896 | 0.74639015  | -2.16104368 |
| H | 4.56683771 | 7.18556099  | -3.78186981 |
| H | 2.53160824 | 6.04467261  | -4.55995407 |
| H | 6.50248958 | -0.02576947 | 1.72887967  |
| H | 4.46726011 | -1.16665786 | 0.95079540  |
| H | 8.08924790 | 6.13389948  | -0.69503754 |
| H | 8.61279169 | 4.18342104  | 0.79547771  |
| H | 0.42130613 | 1.83548210  | -3.62655211 |



|   |            |             |             |
|---|------------|-------------|-------------|
| H | 0.94484991 | -0.11499634 | -2.13603686 |
| H | 6.62735099 | 7.21864217  | -2.34893923 |
| H | 8.03945913 | 1.95778996  | 1.67129513  |
| H | 0.99463868 | 4.06111318  | -4.50236954 |
| H | 2.40674682 | -1.19973904 | -0.48213517 |
| K | 0.20465800 | 0.10074000  | 0.48149700  |

217

n = 6, Energy = -604.333490906120 (54.2)

|   |             |             |             |
|---|-------------|-------------|-------------|
| C | 2.14123990  | -5.99670352 | 0.48958951  |
| C | -0.00608772 | -6.03965303 | -1.36856521 |
| C | 0.84708115  | -6.40330454 | 0.90938569  |
| C | 2.36173483  | -5.61157725 | -0.85928402 |
| C | -0.22658266 | -6.42477930 | -0.01969167 |
| C | 1.28807103  | -5.63305201 | -1.78836138 |
| C | 3.21490370  | -5.97522876 | 1.41866687  |
| C | 0.62658622  | -6.78843081 | 2.25825923  |
| C | 3.65589358  | -5.20497623 | -1.27908020 |
| C | -1.07975153 | -6.06112779 | -2.29764257 |
| C | -1.52074140 | -6.83138032 | 0.40010451  |
| C | 1.50856596  | -5.24792574 | -3.13723492 |
| C | 1.70025002  | -6.76695605 | 3.18733659  |
| C | 4.72955738  | -5.18350147 | -0.35000284 |
| C | -2.59440521 | -6.85285508 | -0.52897285 |
| C | 0.43490215  | -5.26940050 | -4.06631228 |
| C | 2.99440881  | -6.36035503 | 2.76754045  |
| C | 4.50906249  | -5.56862774 | 0.99887074  |
| C | -2.37391031 | -6.46772881 | -1.87784643 |

|   |             |             |             |
|---|-------------|-------------|-------------|
| C | -0.85925663 | -5.67600153 | -3.64651614 |
| C | -0.66757238 | -7.19503175 | 2.67805523  |
| C | 3.87638837  | -4.81985004 | -2.62795357 |
| C | -1.74123619 | -7.21650651 | 1.74897787  |
| C | 2.80272456  | -4.84132480 | -3.55703093 |
| H | 3.81855916  | -6.34387088 | 3.48070543  |
| H | 5.33321284  | -5.55214359 | 1.71203572  |
| H | -3.19806066 | -6.48421296 | -2.59101141 |
| H | -1.68340698 | -5.69248567 | -4.35968113 |
| H | -0.83682557 | -7.49065688 | 3.71345825  |
| H | -2.73463982 | -7.52861578 | 2.07121583  |
| H | 4.86979199  | -4.50774077 | -2.95019152 |
| H | 2.97197775  | -4.54569968 | -4.59243394 |
| H | 1.53099703  | -7.06258109 | 4.22273947  |
| H | -3.58780873 | -7.16496427 | -0.20673511 |
| H | 5.72296091  | -4.87139228 | -0.67224059 |
| H | 0.60415515  | -4.97377546 | -5.10171517 |
| C | 3.76286451  | 1.47167974  | 3.75765470  |
| C | 2.77257006  | 0.34156374  | 6.16758296  |
| C | 2.36370898  | 1.32491905  | 3.95059294  |
| C | 4.66687282  | 1.05338243  | 4.76968060  |
| C | 1.86856175  | 0.75986105  | 5.15555707  |
| C | 4.17172560  | 0.48832443  | 5.97464473  |
| C | 4.25801174  | 2.03673775  | 2.55269057  |
| C | 1.45970067  | 1.74321637  | 2.93856705  |
| C | 6.06602836  | 1.20014312  | 4.57674236  |
| C | 2.27742284  | -0.22349427 | 7.37254709  |

|   |             |             |            |
|---|-------------|-------------|------------|
| C | 0.46940622  | 0.61310036  | 5.34849531 |
| C | 5.07573391  | 0.07002711  | 6.98667062 |
| C | 1.95484789  | 2.30827437  | 1.73360292 |
| C | 6.56117558  | 1.76520113  | 3.37177823 |
| C | -0.02574101 | 0.04804235  | 6.55345944 |
| C | 4.58058669  | -0.49503089 | 8.19163475 |
| C | 3.35400345  | 2.45503509  | 1.54066463 |
| C | 5.65716729  | 2.18349846  | 2.35975229 |
| C | 0.87826728  | -0.37025498 | 7.56548538 |
| C | 3.18143113  | -0.64179161 | 8.38457304 |
| C | 0.06054535  | 1.59645565  | 3.13150536 |
| C | 6.97003645  | 0.78184584  | 5.58876817 |
| C | -0.43460187 | 1.03139764  | 4.33646950 |
| C | 6.47488922  | 0.21678783  | 6.79373230 |
| H | 3.73408123  | 2.88877677  | 0.61572742 |
| H | 6.03724507  | 2.61724015  | 1.43481507 |
| H | 0.49818950  | -0.80399667 | 8.49042259 |
| H | 2.80135335  | -1.07553329 | 9.30951025 |
| H | -0.63337660 | 1.91754305  | 2.35466853 |
| H | -1.50860164 | 0.91874331  | 4.48456997 |
| H | 8.04403622  | 0.89450017  | 5.44066770 |
| H | 7.16881117  | -0.10429957 | 7.57056914 |
| H | 1.26092618  | 2.62936177  | 0.95676611 |
| H | -1.09974058 | -0.06461203 | 6.70156004 |
| H | 7.63517515  | 1.87785551  | 3.22367762 |
| H | 5.27450839  | -0.81611829 | 8.96847156 |
| C | 2.14681940  | -2.33229036 | 0.75096204 |

|   |             |             |             |
|---|-------------|-------------|-------------|
| C | 1.49128801  | -3.04246020 | 3.42145580  |
| C | 0.82826888  | -2.75111140 | 1.07098322  |
| C | 3.13760422  | -2.26855424 | 1.76618775  |
| C | 0.50050319  | -3.10619633 | 2.40623010  |
| C | 2.80983852  | -2.62363916 | 3.10143462  |
| C | 2.47458510  | -1.97720544 | -0.58428483 |
| C | -0.16251593 | -2.81484753 | 0.05575751  |
| C | 4.45615473  | -1.84973320 | 1.44616657  |
| C | 1.16352231  | -3.39754513 | 4.75670268  |
| C | -0.81804733 | -3.52501737 | 2.72625127  |
| C | 3.80062334  | -2.55990304 | 4.11666033  |
| C | 0.16524976  | -2.45976260 | -1.27948936 |
| C | 4.78392043  | -1.49464827 | 0.11091970  |
| C | -1.14581302 | -3.88010229 | 4.06149815  |
| C | 3.47285764  | -2.91498796 | 5.45190721  |
| C | 1.48380029  | -2.04094155 | -1.59951059 |
| C | 3.79313562  | -1.55838438 | -0.90430606 |
| C | -0.15502822 | -3.81636619 | 5.07672391  |
| C | 2.15430711  | -3.33380902 | 5.77192844  |
| C | -1.48106622 | -3.23366852 | 0.37577876  |
| C | 5.44693932  | -1.78599712 | 2.46139221  |
| C | -1.80883192 | -3.58875344 | 1.71102563  |
| C | 5.11917363  | -2.14108204 | 3.79663909  |
| H | 1.73539508  | -1.76837637 | -2.62445357 |
| H | 4.04473041  | -1.28581921 | -1.92924904 |
| H | -0.40662300 | -4.08893136 | 6.10166688  |
| H | 1.90271233  | -3.60637419 | 6.79687141  |

|   |             |             |             |
|---|-------------|-------------|-------------|
| H | -2.24159831 | -3.28259274 | -0.40351427 |
| H | -2.82095882 | -3.91024286 | 1.95667569  |
| H | 6.45906622  | -1.46450770 | 2.21574215  |
| H | 5.87970572  | -2.09215783 | 4.57593212  |
| H | -0.59528209 | -2.50868676 | -2.05878238 |
| H | -2.15793971 | -4.20159168 | 4.30714833  |
| H | 5.79604712  | -1.17315889 | -0.13473049 |
| H | 4.23338949  | -2.86606381 | 6.23120022  |
| C | 0.80741629  | 5.60265074  | 3.08419214  |
| C | 1.28224155  | 4.41721091  | 5.62089727  |
| C | 2.13815939  | 5.42226923  | 3.54569553  |
| C | -0.28591419 | 5.19031234  | 3.89104132  |
| C | 2.37557202  | 4.82954932  | 4.81404809  |
| C | -0.04850156 | 4.59759242  | 5.15939388  |
| C | 0.57000366  | 6.19537066  | 1.81583958  |
| C | 3.23148987  | 5.83460764  | 2.73884636  |
| C | -1.61665729 | 5.37069385  | 3.42953793  |
| C | 1.51965418  | 3.82449099  | 6.88924983  |
| C | 3.70631513  | 4.64916780  | 5.27555148  |
| C | -1.14183203 | 4.18525402  | 5.96624305  |
| C | 2.99407724  | 6.42732755  | 1.47049380  |
| C | -1.85406992 | 5.96341377  | 2.16118537  |
| C | 3.94372776  | 4.05644789  | 6.54390404  |
| C | -0.90441940 | 3.59253410  | 7.23459562  |
| C | 1.66333412  | 6.60770909  | 1.00899035  |
| C | -0.76073946 | 6.37575220  | 1.35433614  |
| C | 2.85039729  | 3.64410946  | 7.35075327  |

|   |             |             |             |
|---|-------------|-------------|-------------|
| C | 0.42632371  | 3.41215257  | 7.69609906  |
| C | 4.56223274  | 5.65422610  | 3.20034978  |
| C | -2.70998753 | 4.95835547  | 4.23638707  |
| C | 4.79964537  | 5.06150619  | 4.46870234  |
| C | -2.47257490 | 4.36563555  | 5.50473963  |
| H | 1.48109486  | 7.06268422  | 0.03539583  |
| H | -0.94297872 | 6.83072732  | 0.38074162  |
| H | 3.03263655  | 3.18913433  | 8.32434780  |
| H | 0.60856297  | 2.95717744  | 8.66969358  |
| H | 5.40147946  | 5.97073941  | 2.58100777  |
| H | 5.82113137  | 4.92304432  | 4.82295496  |
| H | -3.73147353 | 5.09681734  | 3.88213445  |
| H | -3.31182162 | 4.04912225  | 6.12408165  |
| H | 3.83332371  | 6.74384086  | 0.85115176  |
| H | 4.96521353  | 3.91798597  | 6.89815675  |
| H | -2.87555570 | 6.10187569  | 1.80693266  |
| H | -1.74366588 | 3.27602079  | 7.85393765  |
| C | 0.82930992  | -9.06227636 | -3.73472579 |
| C | 1.79444384  | -9.48957059 | -1.09814928 |
| C | -0.05337769 | -9.52023831 | -2.72105252 |
| C | 2.19456450  | -8.81796152 | -3.43011081 |
| C | 0.42918926  | -9.73388543 | -1.40276427 |
| C | 2.67713145  | -9.03160864 | -2.11182255 |
| C | 0.34674297  | -8.84862924 | -5.05301404 |
| C | -1.41863227 | -9.76455314 | -3.02566750 |
| C | 3.07725211  | -8.35999957 | -4.44378408 |
| C | 2.27701080  | -9.70321771 | 0.22013897  |

|   |             |              |             |
|---|-------------|--------------|-------------|
| C | -0.45349835 | -10.19184738 | -0.38909100 |
| C | 4.04238603  | -8.78729381  | -1.80720757 |
| C | -1.90119922 | -9.55090603  | -4.34395576 |
| C | 2.59468516  | -8.14635246  | -5.76207233 |
| C | 0.02906861  | -10.40549449 | 0.92919726  |
| C | 4.52495299  | -9.00094092  | -0.48891932 |
| C | -1.01851163 | -9.09294407  | -5.35762908 |
| C | 1.22943056  | -8.39066728  | -6.06668737 |
| C | 1.39432320  | -10.16117967 | 1.23381230  |
| C | 3.64226539  | -9.45890288  | 0.52475401  |
| C | -2.30131966 | -10.22251503 | -2.01199430 |
| C | 4.44250647  | -8.11568481  | -4.13916903 |
| C | -1.81875271 | -10.43616214 | -0.69370605 |
| C | 4.92507343  | -8.32933192  | -2.82088077 |
| H | -1.38893273 | -8.92894734  | -6.36955452 |
| H | 0.85900946  | -8.22667056  | -7.07861281 |
| H | 1.76474430  | -10.32517639 | 2.24573774  |
| H | 4.01268649  | -9.62289961  | 1.53667945  |
| H | -3.34929687 | -10.41005249 | -2.24581848 |
| H | -2.49630877 | -10.78769635 | 0.08439533  |
| H | 5.12006253  | -7.76415060  | -4.91727040 |
| H | 5.97305063  | -8.14179446  | -2.58705659 |
| H | -2.94917623 | -9.73844341  | -4.57778006 |
| H | -0.64848722 | -10.75702864 | 1.70729862  |
| H | 3.27224098  | -7.79481831  | -6.54017369 |
| H | 5.57292999  | -8.81340354  | -0.25509502 |
| C | -3.46775464 | -0.01449232  | -0.67413484 |

|   |             |             |             |
|---|-------------|-------------|-------------|
| C | -1.77662947 | -0.19060705 | -2.94892686 |
| C | -2.45908258 | 0.96222072  | -0.88629609 |
| C | -3.63086412 | -1.07926272 | -1.59936960 |
| C | -1.61352000 | 0.87416335  | -2.02369210 |
| C | -2.78530153 | -1.16732009 | -2.73676561 |
| C | -4.31331723 | 0.07356505  | 0.46326117  |
| C | -2.29597311 | 2.02699112  | 0.03893867  |
| C | -4.63953618 | -2.05597575 | -1.38720835 |
| C | -0.93106688 | -0.27866442 | -4.08632288 |
| C | -0.60484794 | 1.85087639  | -2.23585335 |
| C | -2.94841101 | -2.23209049 | -3.66200037 |
| C | -3.14153570 | 2.11504849  | 1.17633469  |
| C | -5.48509877 | -1.96791839 | -0.24981234 |
| C | 0.24071465  | 1.76281902  | -3.37324937 |
| C | -2.10284842 | -2.32014786 | -4.79939639 |
| C | -4.15020779 | 1.13833546  | 1.38849598  |
| C | -5.32198933 | -0.90314798 | 0.67542247  |
| C | 0.07760521  | 0.69804861  | -4.29848417 |
| C | -1.09417632 | -1.34343483 | -5.01155769 |
| C | -1.28730116 | 3.00370396  | -0.17322265 |
| C | -4.80264554 | -3.12074596 | -2.31244304 |
| C | -0.44173858 | 2.91564659  | -1.31061866 |
| C | -3.95708295 | -3.20880333 | -3.44983906 |
| H | -4.79926637 | 1.20592879  | 2.26156753  |
| H | -5.97104790 | -0.83555465 | 1.54849402  |
| H | 0.72666379  | 0.63045529  | -5.17155572 |
| H | -0.44511775 | -1.41102815 | -5.88462923 |



|   |             |             |             |
|---|-------------|-------------|-------------|
| H | -1.16209739 | 3.82102780  | 0.53699282  |
| H | 0.33252385  | 3.66537710  | -1.47347483 |
| H | -5.57690796 | -3.87047647 | -2.14958687 |
| H | -4.08228673 | -4.02612717 | -4.16005453 |
| H | -3.01633207 | 2.93237214  | 1.88655013  |
| H | 1.01497699  | 2.51254932  | -3.53610565 |
| H | -6.25936111 | -2.71764869 | -0.08695605 |
| H | -2.22805205 | -3.13747150 | -5.50961184 |
| K | 0.20465800  | 0.10074000  | 0.48149700  |

217

n = 6, Energy = -600.554016582931 (58.0)

|   |             |             |             |
|---|-------------|-------------|-------------|
| C | -5.75568656 | -4.44763401 | -5.87227837 |
| C | -3.60555667 | -6.26279824 | -6.25662175 |
| C | -4.79668550 | -4.20672837 | -6.89143563 |
| C | -5.63962267 | -5.59612177 | -5.04529280 |
| C | -3.72162056 | -5.11431048 | -7.08360732 |
| C | -4.56455773 | -6.50370388 | -5.23746449 |
| C | -6.83075150 | -3.54005190 | -5.68010667 |
| C | -4.91274939 | -3.05824062 | -7.71842120 |
| C | -6.59862372 | -5.83702741 | -4.02613553 |
| C | -2.53049173 | -7.17038035 | -6.44879344 |
| C | -2.76261951 | -4.87340484 | -8.10276459 |
| C | -4.44849384 | -7.65219163 | -4.41047892 |
| C | -5.98781434 | -2.15065851 | -7.52624951 |
| C | -7.67368867 | -4.92944529 | -3.83396384 |
| C | -1.68755457 | -5.78098696 | -8.29493628 |
| C | -3.37342890 | -8.55977374 | -4.60265061 |

|   |             |             |             |
|---|-------------|-------------|-------------|
| C | -6.94681543 | -2.39156411 | -6.50709224 |
| C | -7.78975260 | -3.78095750 | -4.66094940 |
| C | -1.57149063 | -6.92947475 | -7.46795072 |
| C | -2.41442780 | -8.31886814 | -5.62180788 |
| C | -3.95374842 | -2.81733512 | -8.73757829 |
| C | -6.48255975 | -6.98551502 | -3.19915014 |
| C | -2.87868348 | -3.72491723 | -8.92974998 |
| C | -5.40749481 | -7.89309713 | -3.39132183 |
| H | -7.77204130 | -1.69489900 | -6.35958017 |
| H | -8.61497847 | -3.08429240 | -4.51343734 |
| H | -0.74626477 | -7.62613985 | -7.61546278 |
| H | -1.58920193 | -9.01553325 | -5.76931995 |
| H | -4.04283971 | -1.93574937 | -9.37237714 |
| H | -2.14254881 | -3.53999667 | -9.71206091 |
| H | -7.21869442 | -7.17043558 | -2.41683921 |
| H | -5.31840352 | -8.77468288 | -2.75652298 |
| H | -6.07690575 | -1.26907286 | -8.16104817 |
| H | -0.95141993 | -5.59606657 | -9.07724704 |
| H | -8.40982330 | -5.11436568 | -3.05165308 |
| H | -3.28433748 | -9.44135939 | -3.96785194 |
| C | -2.37738356 | -0.46028230 | -0.99949706 |
| C | -4.21255655 | -0.97810933 | 1.10516320  |
| C | -3.44698992 | 0.44045033  | -0.75246864 |
| C | -2.22536370 | -1.61992845 | -0.19419535 |
| C | -4.36457641 | 0.18153682  | 0.29986149  |
| C | -3.14295019 | -1.87884197 | 0.85813478  |
| C | -1.45979707 | -0.20136879 | -2.05182719 |

|   |             |             |             |
|---|-------------|-------------|-------------|
| C | -3.59900978 | 1.60009648  | -1.55777035 |
| C | -1.15575734 | -2.52066109 | -0.44122377 |
| C | -5.13014304 | -1.23702285 | 2.15749332  |
| C | -5.43418277 | 1.08226945  | 0.54688990  |
| C | -2.99093033 | -3.03848812 | 1.66343649  |
| C | -2.68142329 | 1.85901000  | -2.61010048 |
| C | -0.23817085 | -2.26174757 | -1.49355389 |
| C | -6.35176926 | 0.82335594  | 1.59922003  |
| C | -3.90851682 | -3.29740163 | 2.71576662  |
| C | -1.61181689 | 0.95827738  | -2.85712894 |
| C | -0.39019067 | -1.10210141 | -2.29885565 |
| C | -6.19974944 | -0.33629022 | 2.40452178  |
| C | -4.97812322 | -2.39666901 | 2.96279508  |
| C | -4.66861602 | 2.50082892  | -1.31074188 |
| C | -1.00373760 | -3.68030704 | 0.36407789  |
| C | -5.58620251 | 2.24191541  | -0.25841175 |
| C | -1.92132409 | -3.93922055 | 1.41640802  |
| H | -0.90747237 | 1.15702084  | -3.66490344 |
| H | 0.31415385  | -0.90335795 | -3.10663014 |
| H | -6.90409397 | -0.53503368 | 3.21229628  |
| H | -5.68246775 | -2.59541247 | 3.77056957  |
| H | -4.78530735 | 3.39097992  | -1.92889606 |
| H | -6.40723845 | 2.93332292  | -0.06879135 |
| H | -0.18270166 | -4.37171456 | 0.17445748  |
| H | -1.80463276 | -4.82937156 | 2.03456219  |
| H | -2.79811446 | 2.74916082  | -3.22825465 |
| H | -7.17280512 | 1.51476325  | 1.78884054  |

|   |             |             |             |
|---|-------------|-------------|-------------|
| H | 0.58286501  | -2.95315488 | -1.68317440 |
| H | -3.79182565 | -4.18755245 | 3.33392078  |
| C | 2.83737463  | 1.21825932  | -0.98363218 |
| C | 3.16557176  | -0.22103310 | 1.44254248  |
| C | 2.80986778  | 1.90532113  | 0.25878060  |
| C | 3.02898005  | -0.18844870 | -1.01295763 |
| C | 2.97396634  | 1.18567492  | 1.47186793  |
| C | 3.19307862  | -0.90809491 | 0.20012970  |
| C | 2.67327607  | 1.93790553  | -2.19671951 |
| C | 2.61826235  | 3.31202915  | 0.28810605  |
| C | 3.05648691  | -0.87551051 | -2.25537041 |
| C | 3.32967032  | -0.94067931 | 2.65562981  |
| C | 2.94645948  | 1.87273673  | 2.71428071  |
| C | 3.38468404  | -2.31480293 | 0.17080425  |
| C | 2.45416379  | 4.03167536  | -0.92498128 |
| C | 2.89238835  | -0.15586430 | -3.46845774 |
| C | 3.11055805  | 1.15309052  | 3.92736804  |
| C | 3.54878260  | -3.03444914 | 1.38389158  |
| C | 2.48167064  | 3.34461358  | -2.16739412 |
| C | 2.70078292  | 1.25084375  | -3.43913234 |
| C | 3.30216347  | -0.25361753 | 3.89804264  |
| C | 3.52127575  | -2.34738736 | 2.62630441  |
| C | 2.59075552  | 3.99909076  | 1.53051870  |
| C | 3.24809231  | -2.28221833 | -2.28469574 |
| C | 2.75485408  | 3.27944455  | 2.74360603  |
| C | 3.41219087  | -3.00186454 | -1.07160841 |
| H | 2.35570766  | 3.89701804  | -3.09856674 |

|   |             |             |             |
|---|-------------|-------------|-------------|
| H | 2.57481994  | 1.80324821  | -4.37030497 |
| H | 3.42812645  | -0.80602199 | 4.82921527  |
| H | 3.64723873  | -2.89979182 | 3.55747704  |
| H | 2.44367811  | 5.07888786  | 1.55302910  |
| H | 2.73373966  | 3.80683713  | 3.69728916  |
| H | 3.26920673  | -2.80961091 | -3.23837886 |
| H | 3.55926829  | -4.08166164 | -1.09411881 |
| H | 2.30708639  | 5.11147229  | -0.90247106 |
| H | 3.08944365  | 1.68048287  | 4.88105109  |
| H | 2.91350274  | -0.68325665 | -4.42214080 |
| H | 3.69586000  | -4.11424607 | 1.36138135  |
| C | -2.61341199 | 1.70859004  | 3.58900341  |
| C | -5.25127238 | 1.97801765  | 4.60620586  |
| C | -3.42955818 | 2.79165389  | 3.16795926  |
| C | -3.11619599 | 0.76024000  | 4.51864878  |
| C | -4.74848837 | 2.92636769  | 3.67656049  |
| C | -4.43512619 | 0.89495380  | 5.02725001  |
| C | -1.29448179 | 1.57387623  | 3.08040218  |
| C | -2.92677417 | 3.74000393  | 2.23831389  |
| C | -2.30004980 | -0.32282385 | 4.93969293  |
| C | -6.57020258 | 2.11273146  | 5.11480709  |
| C | -5.56463456 | 4.00943154  | 3.25551634  |
| C | -4.93791020 | -0.05339624 | 5.95689538  |
| C | -1.60784398 | 3.60529012  | 1.72971266  |
| C | -0.98111961 | -0.45753766 | 4.43109170  |
| C | -6.88356476 | 4.14414535  | 3.76411757  |
| C | -6.25684039 | 0.08131757  | 6.46549661  |

|   |             |             |             |
|---|-------------|-------------|-------------|
| C | -0.79169773 | 2.52222627  | 2.15075679  |
| C | -0.47833555 | 0.49081238  | 3.50144631  |
| C | -7.38634882 | 3.19579531  | 4.69376296  |
| C | -7.07298664 | 1.16438142  | 6.04445248  |
| C | -3.74292033 | 4.82306758  | 1.81726987  |
| C | -2.80283384 | -1.27117370 | 5.86933817  |
| C | -5.06185053 | 4.95778139  | 2.32587110  |
| C | -4.12176404 | -1.13645989 | 6.37793940  |
| H | 0.22072047  | 2.41881920  | 1.76035164  |
| H | 0.53408265  | 0.38740531  | 3.11104116  |
| H | -8.39876702 | 3.29920238  | 5.08416811  |
| H | -8.08540484 | 1.26778849  | 6.43485763  |
| H | -3.35698048 | 5.55102649  | 1.10366878  |
| H | -5.68832898 | 5.78914738  | 2.00267520  |
| H | -2.17635538 | -2.10253969 | 6.19253407  |
| H | -4.50770389 | -1.86441880 | 7.09154049  |
| H | -1.22190404 | 4.33324883  | 1.01611168  |
| H | -7.51004324 | 4.97551115  | 3.44092182  |
| H | -0.35464113 | -1.28890346 | 4.75428745  |
| H | -6.64278033 | -0.64664114 | 7.17909759  |
| C | 6.54425925  | 0.48989034  | -1.61789227 |
| C | 6.70142448  | 0.45222009  | 1.21750533  |
| C | 6.74925217  | -0.73780446 | -0.93441333 |
| C | 6.41784895  | 1.69875001  | -0.88367241 |
| C | 6.82783479  | -0.75663959 | 0.48328547  |
| C | 6.49643156  | 1.67991489  | 0.53402639  |
| C | 6.46567663  | 0.50872547  | -3.03559107 |

|   |            |             |             |
|---|------------|-------------|-------------|
| C | 6.87566247 | -1.94666413 | -1.66863319 |
| C | 6.21285603 | 2.92644481  | -1.56715135 |
| C | 6.78000710 | 0.43338496  | 2.63520413  |
| C | 7.03282771 | -1.98433438 | 1.16676441  |
| C | 6.37002126 | 2.88877456  | 1.26824625  |
| C | 6.79707986 | -1.92782900 | -3.08633199 |
| C | 6.13427341 | 2.94527994  | -2.98485015 |
| C | 7.11141032 | -2.00316951 | 2.58446321  |
| C | 6.44860388 | 2.86993943  | 2.68594505  |
| C | 6.59208693 | -0.70013421 | -3.76981099 |
| C | 6.26068371 | 1.73642027  | -3.71907007 |
| C | 6.98500002 | -0.79430984 | 3.31868313  |
| C | 6.65359680 | 1.64224463  | 3.36942405  |
| C | 7.08065536 | -3.17435869 | -0.98515425 |
| C | 6.08644576 | 4.13530425  | -0.83293149 |
| C | 7.15923798 | -3.19319382 | 0.43254455  |
| C | 6.16502837 | 4.11646912  | 0.58476731  |
| H | 6.53176648 | -0.68567626 | -4.85804452 |
| H | 6.20036326 | 1.75087821  | -4.80730360 |
| H | 7.04532048 | -0.80876779 | 4.40691666  |
| H | 6.71391725 | 1.62778668  | 4.45765758  |
| H | 7.17768863 | -4.10228628 | -1.54874558 |
| H | 7.31659171 | -4.13557936 | 0.95718687  |
| H | 5.92909202 | 5.07768979  | -1.35757381 |
| H | 6.06799510 | 5.04439671  | 1.14835864  |
| H | 6.89411309 | -2.85575636 | -3.64992338 |
| H | 7.26876403 | -2.94555481 | 3.10910559  |

|   |             |             |             |
|---|-------------|-------------|-------------|
| H | 5.97691970  | 3.88766524  | -3.50949253 |
| H | 6.35157064  | 3.79786678  | 3.24953644  |
| C | -2.87962982 | -2.35547136 | -4.48183858 |
| C | -4.81540491 | -2.81293561 | -2.45474688 |
| C | -2.77768287 | -3.50044856 | -3.64815154 |
| C | -3.94946431 | -1.43922627 | -4.30197977 |
| C | -3.74557041 | -3.72918069 | -2.63460569 |
| C | -4.91735185 | -1.66795840 | -3.28843392 |
| C | -1.91174228 | -2.12673923 | -5.49538444 |
| C | -1.70784838 | -4.41669365 | -3.82801035 |
| C | -4.05141126 | -0.29424907 | -5.13566682 |
| C | -5.78329245 | -3.04166774 | -1.44120102 |
| C | -3.64362347 | -4.87415790 | -1.80091864 |
| C | -5.98718634 | -0.75171332 | -3.10857511 |
| C | -0.73996084 | -4.18796152 | -4.84155620 |
| C | -3.08352372 | -0.06551694 | -6.14921267 |
| C | -4.61151101 | -5.10289003 | -0.78737279 |
| C | -6.95507389 | -0.98044545 | -2.09502926 |
| C | -0.84190775 | -3.04298430 | -5.67524329 |
| C | -2.01368919 | -0.98176201 | -6.32907152 |
| C | -5.68134554 | -4.18664496 | -0.60751394 |
| C | -6.85312698 | -2.12542267 | -1.26134217 |
| C | -1.60590155 | -5.56167065 | -2.99432337 |
| C | -5.12124564 | 0.62199582  | -4.95580794 |
| C | -2.57378909 | -5.79040278 | -1.98077752 |
| C | -6.08913318 | 0.39326369  | -3.94226209 |
| H | -0.09895185 | -2.86740824 | -6.45324676 |



|   |             |             |             |
|---|-------------|-------------|-------------|
| H | -1.27073329 | -0.80618595 | -7.10707499 |
| H | -6.42430143 | -4.36222102 | 0.17048953  |
| H | -7.59608287 | -2.30099873 | -0.48333870 |
| H | -0.78469050 | -6.26498562 | -3.13238401 |
| H | -2.49553401 | -6.66929383 | -1.34083460 |
| H | -5.19950071 | 1.50088686  | -5.59575086 |
| H | -6.91034423 | 1.09657865  | -3.80420145 |
| H | 0.08125014  | -4.89127627 | -4.97961694 |
| H | -4.53325609 | -5.98178088 | -0.14742989 |
| H | -3.16177864 | 0.81337392  | -6.78915557 |
| H | -7.77628486 | -0.27713070 | -1.95696851 |
| K | 0.20465800  | 0.10074000  | 0.48149700  |

### Cartesian coordinates and energies of the $\text{Cs}^+\text{Cor}_n$ clusters

All coordinates are in Å, while the energies are in  $\text{kJ mol}^{-1}$ .

#### Structures in Fig. 4

37

n = 1, Energy = -100.80474063

|   |             |            |             |
|---|-------------|------------|-------------|
| C | -0.04434214 | 2.82057654 | -1.58029288 |
| C | -2.43755961 | 1.31314768 | -1.32384041 |
| C | -0.97788431 | 3.13883651 | -0.55872072 |
| C | -0.30740871 | 1.74860214 | -2.47363881 |
| C | -2.17449305 | 2.38512208 | -0.43049449 |
| C | -1.50401744 | 0.99488771 | -2.34541257 |
| C | 1.15226659  | 3.57429097 | -1.70851912 |
| C | -0.71481775 | 4.21081091 | 0.33462520  |
| C | 0.62613347  | 1.43034217 | -3.49521097 |

|   |             |             |             |
|---|-------------|-------------|-------------|
| C | -3.63416835 | 0.55943325  | -1.19561417 |
| C | -3.10803522 | 2.70338205  | 0.59107768  |
| C | -1.76708401 | -0.07708670 | -3.23875850 |
| C | 0.48179099  | 4.96452534  | 0.20639897  |
| C | 1.82274220  | 2.18405660  | -3.62343721 |
| C | -4.30464396 | 1.94966762  | 0.71930391  |
| C | -2.96369274 | -0.83080113 | -3.11053226 |
| C | 1.41533321  | 4.64626540  | -0.81517320 |
| C | 2.08580882  | 3.25603103  | -2.73009129 |
| C | -4.56771057 | 0.87769319  | -0.17404201 |
| C | -3.89723496 | -0.51254119 | -2.08896009 |
| C | -1.64835986 | 4.52907075  | 1.35619718  |
| C | 0.36306684  | 0.35836790  | -4.38855671 |
| C | -2.84496859 | 3.77535632  | 1.48442341  |
| C | -0.83354190 | -0.39534653 | -4.26033047 |
| H | 2.33385677  | 5.22482082  | -0.91360038 |
| H | 3.00433238  | 3.83458645  | -2.82851846 |
| H | -5.48623413 | 0.29913777  | -0.07561483 |
| H | -4.81575853 | -1.09109660 | -1.99053292 |
| H | -1.44642848 | 5.35192441  | 2.04193461  |
| H | -3.56156088 | 4.01965450  | 2.26858804  |
| H | 1.07965912  | 0.11406972  | -5.17272133 |
| H | -1.03547328 | -1.21820019 | -4.94606791 |
| H | 0.68372248  | 5.78737890  | 0.89213621  |
| H | -5.02123623 | 2.19396564  | 1.50346836  |
| H | 2.53933447  | 1.93975858  | -4.40760165 |
| H | -3.16562424 | -1.65365469 | -3.79626950 |

Cs        0.20465800        0.10074000        0.48149700

73

n = 2, Energy = -221.03922978

|   |             |            |             |
|---|-------------|------------|-------------|
| C | 1.66255312  | 3.25166074 | 0.64345716  |
| C | 2.08710405  | 1.73838665 | -1.72199365 |
| C | 0.75165515  | 3.35824868 | -0.44065721 |
| C | 2.78572656  | 2.38843576 | 0.54484613  |
| C | 0.96393061  | 2.60161163 | -1.62338261 |
| C | 2.99800202  | 1.63179871 | -0.63787928 |
| C | 1.45027766  | 4.00829778 | 1.82618257  |
| C | -0.37151829 | 4.22147366 | -0.34204617 |
| C | 3.69662453  | 2.28184782 | 1.62896050  |
| C | 2.29937951  | 0.98174960 | -2.90471905 |
| C | 0.05303264  | 2.70819957 | -2.70749699 |
| C | 4.12117546  | 0.76857373 | -0.73649031 |
| C | -0.58379375 | 4.97811071 | 0.84067923  |
| C | 3.48434907  | 3.03848486 | 2.81168591  |
| C | 0.26530811  | 1.95156252 | -3.89022239 |
| C | 4.33345092  | 0.01193668 | -1.91921572 |
| C | 0.32710421  | 4.87152280 | 1.92479366  |
| C | 2.36117562  | 3.90170988 | 2.91029699  |
| C | 1.38848155  | 1.08833751 | -3.98883348 |
| C | 3.42255296  | 0.11852459 | -3.00333014 |
| C | -1.28241606 | 4.32806150 | -1.42616045 |
| C | 4.81979777  | 1.41862293 | 1.53034937  |
| C | -1.07014060 | 3.57142446 | -2.60888586 |
| C | 5.03207324  | 0.66198588 | 0.34762397  |

|   |             |             |             |
|---|-------------|-------------|-------------|
| H | 0.16416038  | 5.45232163  | 2.83266030  |
| H | 2.19823179  | 4.48250871  | 3.81816363  |
| H | 1.55142539  | 0.50753868  | -4.89670012 |
| H | 3.58549679  | -0.46227424 | -3.91119678 |
| H | -2.14457040 | 4.99067792  | -1.35046607 |
| H | -1.76935109 | 3.65324198  | -3.44105822 |
| H | 5.51900826  | 1.33680541  | 2.36252174  |
| H | 5.89422758  | -0.00063053 | 0.27192959  |
| H | -1.44594790 | 5.64072706  | 0.91637375  |
| H | -0.43390218 | 2.03337992  | -4.72239471 |
| H | 4.18355935  | 2.95666747  | 3.64385823  |
| H | 5.19560508  | -0.65067967 | -1.99491024 |
| C | -1.72550022 | -1.76067756 | 2.45392184  |
| C | -0.52014968 | 0.38670175  | 3.86866270  |
| C | -2.39254661 | -0.51082217 | 2.55041372  |
| C | -0.45577855 | -1.93684329 | 3.06480039  |
| C | -1.78987135 | 0.56286749  | 3.25778415  |
| C | 0.14689672  | -0.86315364 | 3.77217082  |
| C | -2.32817548 | -2.83436722 | 1.74655141  |
| C | -3.66226828 | -0.33465644 | 1.93953517  |
| C | 0.21126785  | -3.18669868 | 2.96830852  |
| C | 0.08252558  | 1.46039141  | 4.57603312  |
| C | -2.45691775 | 1.81272288  | 3.35427602  |
| C | 1.41661838  | -1.03931937 | 4.38304937  |
| C | -4.26494355 | -1.40834609 | 1.23216474  |
| C | -0.39140742 | -4.26038834 | 2.26093809  |
| C | -1.85424248 | 2.88641253  | 4.06164645  |

|    |             |             |            |
|----|-------------|-------------|------------|
| C  | 2.01929365  | 0.03437029  | 5.09041980 |
| C  | -3.59789717 | -2.65820153 | 1.13567283 |
| C  | -1.66112911 | -4.08422265 | 1.65005951 |
| C  | -0.58452079 | 2.71024685  | 4.67252503 |
| C  | 1.35224728  | 1.28422572  | 5.18691170 |
| C  | -4.32931449 | 0.91519882  | 2.03602710 |
| C  | 1.48098933  | -3.36286428 | 3.57918702 |
| C  | -3.72663922 | 1.98888847  | 2.74339752 |
| C  | 2.08366459  | -2.28917462 | 4.28655744 |
| H  | -4.06051408 | -3.48237172 | 0.59269134 |
| H  | -2.12374602 | -4.90839284 | 1.10707801 |
| H  | -0.12190388 | 3.53441704  | 5.21550653 |
| H  | 1.81486418  | 2.10839591  | 5.72989320 |
| H  | -5.30396008 | 1.05042465  | 1.56711324 |
| H  | -4.23866786 | 2.94828459  | 2.81746523 |
| H  | 1.99301796  | -4.32226040 | 3.50511931 |
| H  | 3.05831019  | -2.42440046 | 4.75547130 |
| H  | -5.23958898 | -1.27312044 | 0.76325091 |
| H  | -2.36627090 | 3.84580856  | 4.13571424 |
| H  | 0.12062100  | -5.21978437 | 2.18687030 |
| H  | 2.99393908  | -0.10085537 | 5.55933363 |
| Cs | 0.20465800  | 0.10074000  | 0.48149700 |

109

n = 3, Energy = -343.42551181

|   |            |            |             |
|---|------------|------------|-------------|
| C | 3.32069301 | 2.59064486 | -0.31251013 |
| C | 2.81907547 | 2.66213190 | 2.48192523  |
| C | 3.05421033 | 3.82884442 | 0.32955599  |

|   |            |             |             |
|---|------------|-------------|-------------|
| C | 3.33636692 | 1.38818882  | 0.44264143  |
| C | 2.80340156 | 3.86458794  | 1.72677367  |
| C | 3.08555815 | 1.42393234  | 1.83985911  |
| C | 3.57150177 | 2.55490133  | -1.70972780 |
| C | 3.03853641 | 5.03130046  | -0.42559557 |
| C | 3.60284960 | 0.14998925  | -0.19942469 |
| C | 2.56826671 | 2.69787542  | 3.87914291  |
| C | 2.53691888 | 5.10278750  | 2.36883979  |
| C | 3.10123206 | 0.22147630  | 2.59501067  |
| C | 3.28934518 | 4.99555694  | -1.82281324 |
| C | 3.85365836 | 0.11424573  | -1.59664237 |
| C | 2.28611012 | 5.13853103  | 3.76605747  |
| C | 2.85042330 | 0.25721982  | 3.99222835  |
| C | 3.55582787 | 3.75735737  | -2.46487942 |
| C | 3.83798446 | 1.31670177  | -2.35179398 |
| C | 2.30178402 | 3.93607499  | 4.52120909  |
| C | 2.58394061 | 1.49541939  | 4.63429453  |
| C | 2.77205376 | 6.26949978  | 0.21647056  |
| C | 3.61852348 | -1.05246655 | 0.55572686  |
| C | 2.52124500 | 6.30524331  | 1.61368824  |
| C | 3.36771471 | -1.01672303 | 1.95294454  |
| H | 3.74835008 | 3.72992044  | -3.53739153 |
| H | 4.03050667 | 1.28926484  | -3.42430609 |
| H | 2.10926180 | 3.96351192  | 5.59372120  |
| H | 2.39141840 | 1.52285631  | 5.70680664  |
| H | 2.76002237 | 7.19251191  | -0.36318806 |
| H | 2.31669137 | 7.25569236  | 2.10654184  |

|   |             |             |             |
|---|-------------|-------------|-------------|
| H | 3.82307710  | -2.00291560 | 0.06287326  |
| H | 3.37974610  | -1.93973515 | 2.53260317  |
| H | 3.27731383  | 5.91856882  | -2.40247192 |
| H | 2.08155651  | 6.08897985  | 4.25891114  |
| H | 4.05821197  | -0.83620309 | -2.08949603 |
| H | 2.86245465  | -0.66579206 | 4.57188703  |
| C | 1.01704281  | -3.34443601 | -1.52107009 |
| C | 1.04294405  | -3.90998643 | 1.26192854  |
| C | -0.12067248 | -3.04635055 | -0.72536345 |
| C | 2.16770872  | -3.92529668 | -0.92527741 |
| C | -0.10772186 | -3.32912576 | 0.66613586  |
| C | 2.18065934  | -4.20807189 | 0.46622190  |
| C | 1.00409219  | -3.06166081 | -2.91256940 |
| C | -1.27133840 | -2.46548989 | -1.32115613 |
| C | 3.30542401  | -4.22338214 | -1.72098405 |
| C | 1.05589467  | -4.19276163 | 2.65342785  |
| C | -1.24543715 | -3.03104030 | 1.46184249  |
| C | 3.33132526  | -4.78893256 | 1.06201458  |
| C | -1.28428902 | -2.18271468 | -2.71265545 |
| C | 3.29247339  | -3.94060694 | -3.11248336 |
| C | -1.23248653 | -3.31381551 | 2.85334181  |
| C | 3.34427588  | -5.07170776 | 2.45351390  |
| C | -0.14657373 | -2.48080013 | -3.50836214 |
| C | 2.14180748  | -3.35974626 | -3.70827610 |
| C | -0.08182062 | -3.89467618 | 3.44913455  |
| C | 2.20656059  | -4.77362231 | 3.24922059  |
| C | -2.40905347 | -2.16740451 | -0.52544952 |

|   |             |             |             |
|---|-------------|-------------|-------------|
| C | 4.45608971  | -4.80424272 | -1.12519135 |
| C | -2.39610285 | -2.45017972 | 0.86604980  |
| C | 4.46904033  | -5.08701793 | 0.26630797  |
| H | -0.15651470 | -2.26374030 | -4.57648480 |
| H | 2.13186651  | -3.14268642 | -4.77639876 |
| H | -0.07187965 | -4.11173602 | 4.51725721  |
| H | 2.21650156  | -4.99068214 | 4.31734325  |
| H | -3.29231119 | -1.72153255 | -0.98278336 |
| H | -3.26941960 | -2.22136761 | 1.47683873  |
| H | 5.32940646  | -5.03305483 | -1.73598028 |
| H | 5.35229805  | -5.53288989 | 0.72364181  |
| H | -2.16754652 | -1.73684279 | -3.16998937 |
| H | -2.10580307 | -3.08500350 | 3.46413078  |
| H | 4.16578993  | -4.16941895 | -3.72327234 |
| H | 4.22753338  | -5.51757965 | 2.91084782  |
| C | -4.11429875 | 0.86544318  | -1.19285845 |
| C | -2.68299865 | 1.90566843  | 1.02860750  |
| C | -3.00902810 | 1.73182654  | -1.40299354 |
| C | -4.50391934 | 0.51917244  | 0.12800961  |
| C | -2.29337805 | 2.25193916  | -0.29226056 |
| C | -3.78826930 | 1.03928507  | 1.23874259  |
| C | -4.82994879 | 0.34533056  | -2.30359143 |
| C | -2.61940750 | 2.07809727  | -2.72386161 |
| C | -5.60918999 | -0.34721092 | 0.33814470  |
| C | -1.96734860 | 2.42578105  | 2.13934048  |
| C | -1.18810741 | 3.11832252  | -0.50239565 |
| C | -4.17788989 | 0.69301433  | 2.55961065  |



|    |             |             |             |
|----|-------------|-------------|-------------|
| C  | -3.33505755 | 1.55798465  | -3.83459458 |
| C  | -6.32484003 | -0.86732354 | -0.77258828 |
| C  | -0.47245736 | 3.63843514  | 0.60833733  |
| C  | -3.46223984 | 1.21312695  | 3.67034363  |
| C  | -4.44032823 | 0.69160127  | -3.62445954 |
| C  | -5.93521947 | -0.52105282 | -2.09345639 |
| C  | -0.86207793 | 3.29216443  | 1.92920544  |
| C  | -2.35696917 | 2.07951034  | 3.46020859  |
| C  | -1.51413701 | 2.94448052  | -2.93399655 |
| C  | -5.99881044 | -0.69348153 | 1.65901261  |
| C  | -0.79848696 | 3.46459314  | -1.82326357 |
| C  | -5.28316039 | -0.17336891 | 2.76974559  |
| H  | -4.98966521 | 0.29235991  | -4.47706439 |
| H  | -6.48455645 | -0.92029419 | -2.94606124 |
| H  | -0.31274095 | 3.69140579  | 2.78181029  |
| H  | -1.80763219 | 2.47875170  | 4.31281344  |
| H  | -1.21506200 | 3.21027992  | -3.94790240 |
| H  | 0.04992509  | 4.12963395  | -1.98456448 |
| H  | -6.84722249 | -1.35852234 | 1.82031353  |
| H  | -5.58223540 | -0.43916831 | 3.78365145  |
| H  | -3.03598272 | 1.82378391  | -4.84850034 |
| H  | 0.37595457  | 4.30347585  | 0.44703661  |
| H  | -7.17325197 | -1.53236425 | -0.61128756 |
| H  | -3.76131468 | 0.94732769  | 4.68424938  |
| Cs | 0.20465800  | 0.10074000  | 0.48149700  |

145

n = 4, Energy = -440.50483286

|   |            |             |             |
|---|------------|-------------|-------------|
| C | 3.17619218 | -1.56967809 | 0.46197163  |
| C | 2.05382790 | -3.86138886 | 1.70855083  |
| C | 3.52341999 | -1.89136434 | 1.80075873  |
| C | 2.26778223 | -2.39384723 | -0.25352586 |
| C | 2.96223785 | -3.03721973 | 2.42404832  |
| C | 1.70660008 | -3.53970261 | 0.36976373  |
| C | 3.73737432 | -0.42382271 | -0.16131796 |
| C | 4.43182995 | -1.06719521 | 2.51625622  |
| C | 1.92055441 | -2.07216098 | -1.59231296 |
| C | 1.49264576 | -5.00724425 | 2.33184042  |
| C | 3.30946567 | -3.35890598 | 3.76283542  |
| C | 0.79819013 | -4.36387175 | -0.34573376 |
| C | 4.99301209 | 0.07866018  | 1.89296663  |
| C | 2.48173656 | -0.92630560 | -2.21560255 |
| C | 2.74828352 | -4.50476136 | 4.38612501  |
| C | 0.23700799 | -5.50972713 | 0.27755583  |
| C | 4.64578430 | 0.40034647  | 0.55417951  |
| C | 3.39014653 | -0.10213641 | -1.50010508 |
| C | 1.83987355 | -5.32893054 | 3.67062754  |
| C | 0.58423578 | -5.83141343 | 1.61634295  |
| C | 4.77905764 | -1.38888151 | 3.85504312  |
| C | 1.01214458 | -2.89633007 | -2.30781025 |
| C | 4.21787550 | -2.53473689 | 4.47833271  |
| C | 0.45096244 | -4.04218545 | -1.68452066 |
| H | 5.07655085 | 1.27991148  | 0.07573893  |
| H | 3.82091309 | 0.77742859  | -1.97854566 |
| H | 1.40910699 | -6.20849555 | 4.14906812  |

|   |             |             |             |
|---|-------------|-------------|-------------|
| H | 0.15346922  | -6.71097843 | 2.09478354  |
| H | 5.47635830  | -0.75624459 | 4.40426309  |
| H | 4.48440956  | -2.78166507 | 5.50599332  |
| H | 0.74561052  | -2.64940188 | -3.33547086 |
| H | -0.24633822 | -4.67482237 | -2.23374063 |
| H | 5.69031265  | 0.71129709  | 2.44218638  |
| H | 3.01481744  | -4.75168964 | 5.41378545  |
| H | 2.21520264  | -0.67937732 | -3.24326299 |
| H | -0.46029257 | -6.14236405 | -0.27166392 |
| C | -1.64160909 | 4.55734476  | -4.49731327 |
| C | -3.39108371 | 5.00843435  | -2.30609072 |
| C | -2.86007823 | 3.83451694  | -4.40112077 |
| C | -1.29787727 | 5.50571737  | -3.49789449 |
| C | -3.73481553 | 4.06006173  | -3.30550950 |
| C | -2.17261458 | 5.73126216  | -2.40228321 |
| C | -0.76687178 | 4.33179996  | -5.59292454 |
| C | -3.20381005 | 2.88614433  | -5.40053955 |
| C | -0.07940814 | 6.22854519  | -3.59408698 |
| C | -4.26582102 | 5.23397914  | -1.21047944 |
| C | -4.95328467 | 3.33723392  | -3.20931700 |
| C | -1.82888275 | 6.67963478  | -1.40286443 |
| C | -2.32907274 | 2.66059953  | -6.49615083 |
| C | 0.79532917  | 6.00300039  | -4.68969826 |
| C | -5.82802197 | 3.56277871  | -2.11370573 |
| C | -2.70362006 | 6.90517957  | -0.30725316 |
| C | -1.11060357 | 3.38342734  | -6.59234337 |
| C | 0.45159739  | 5.05462777  | -5.68911708 |

|   |             |             |             |
|---|-------------|-------------|-------------|
| C | -5.48429019 | 4.51115134  | -1.11428690 |
| C | -3.92208923 | 6.18235176  | -0.21106062 |
| C | -4.42227903 | 2.16331667  | -5.30434697 |
| C | 0.26432354  | 7.17691764  | -2.59466829 |
| C | -5.29701634 | 2.38886147  | -4.20873570 |
| C | -0.61041377 | 7.40246243  | -1.49905702 |
| H | -0.43915032 | 3.21029789  | -7.43334071 |
| H | 1.12305064  | 4.88149832  | -6.53011443 |
| H | -6.15574344 | 4.68428078  | -0.27328956 |
| H | -4.59354248 | 6.35548121  | 0.62993673  |
| H | -4.68612956 | 1.43534044  | -6.07150652 |
| H | -6.23232019 | 1.83401470  | -4.13489780 |
| H | 1.19962739  | 7.73176440  | -2.66850618 |
| H | -0.34656325 | 8.13043866  | -0.73189747 |
| H | -2.59292308 | 1.93262345  | -7.26331033 |
| H | -6.76332571 | 3.00793212  | -2.03986770 |
| H | 1.73063291  | 6.55784698  | -4.76353628 |
| H | -2.43976972 | 7.63315565  | 0.45990635  |
| C | -1.95518219 | -0.18333667 | 3.13018876  |
| C | -3.20801963 | 2.36507401  | 3.09017774  |
| C | -1.23464298 | 0.96860771  | 3.54279931  |
| C | -3.30214013 | -0.06107571 | 2.69757270  |
| C | -1.86106169 | 2.24281305  | 3.52279379  |
| C | -3.92855885 | 1.21312963  | 2.67756719  |
| C | -1.32876348 | -1.45754201 | 3.15019427  |
| C | 0.11231496  | 0.84634675  | 3.97541536  |
| C | -4.02267935 | -1.21302009 | 2.28496216  |

|   |             |             |            |
|---|-------------|-------------|------------|
| C | -3.83443835 | 3.63927935  | 3.07017222 |
| C | -1.14052247 | 3.39475743  | 3.93540434 |
| C | -5.27551678 | 1.33539059  | 2.24495113 |
| C | 0.73873368  | -0.42785859 | 3.99542088 |
| C | -3.39626063 | -2.48722543 | 2.30496767 |
| C | -1.76694119 | 4.66896277  | 3.91539882 |
| C | -5.90193550 | 2.60959593  | 2.22494562 |
| C | 0.01819449  | -1.57980303 | 3.58281033 |
| C | -2.04930267 | -2.60948644 | 2.73758373 |
| C | -3.11389915 | 4.79122378  | 3.48278277 |
| C | -5.18139631 | 3.76154036  | 2.63755617 |
| C | 0.83285398  | 1.99829102  | 4.38802583 |
| C | -5.36963708 | -1.09075903 | 1.85234619 |
| C | 0.20643526  | 3.27249636  | 4.36802031 |
| C | -5.99605580 | 0.18344631  | 1.83234067 |
| H | 0.49903700  | -2.55789018 | 3.59816668 |
| H | -1.56846015 | -3.58757359 | 2.75294008 |
| H | -3.59474167 | 5.76931093  | 3.46742642 |
| H | -5.66223882 | 4.73962751  | 2.62219982 |
| H | 1.86678657  | 1.90444283  | 4.72010438 |
| H | 0.75952529  | 4.15673543  | 4.68474252 |
| H | -5.92272711 | -1.97499809 | 1.53562397 |
| H | -7.02998840 | 0.27729451  | 1.50026212 |
| H | 1.77266610  | -0.52170694 | 4.32749935 |
| H | -1.21385139 | 5.55320178  | 4.23212095 |
| H | -3.94935043 | -3.37146444 | 1.98824555 |
| H | -6.93586792 | 2.70344428  | 1.89286715 |

|   |             |             |             |
|---|-------------|-------------|-------------|
| C | 1.28351982  | 1.87406708  | -3.84862016 |
| C | -1.06181137 | 1.60620552  | -2.26961057 |
| C | 1.11823141  | 2.66738309  | -2.68254576 |
| C | 0.27614264  | 0.94682028  | -4.22518977 |
| C | -0.05443419 | 2.53345232  | -1.89304096 |
| C | -0.89652296 | 0.81288950  | -3.43568497 |
| C | 2.45618542  | 2.00799785  | -4.63812495 |
| C | 2.12560859  | 3.59462989  | -2.30597615 |
| C | 0.44143105  | 0.15350426  | -5.39126417 |
| C | -2.23447697 | 1.47227474  | -1.48010578 |
| C | -0.21972261 | 3.32676833  | -0.72696656 |
| C | -1.90390014 | -0.11435729 | -3.81225458 |
| C | 3.29827419  | 3.72856067  | -3.09548094 |
| C | 1.61409665  | 0.28743504  | -6.18076896 |
| C | -1.39238821 | 3.19283756  | 0.06253823  |
| C | -3.07656574 | -0.24828807 | -3.02274979 |
| C | 3.46356265  | 2.93524465  | -4.26155538 |
| C | 2.62147388  | 1.21468184  | -5.80419939 |
| C | -2.39976544 | 2.26559076  | -0.31403134 |
| C | -3.24185420 | 0.54502794  | -1.85667535 |
| C | 1.96032009  | 4.38794574  | -1.13990190 |
| C | -0.56594605 | -0.77374237 | -5.76783363 |
| C | 0.78765449  | 4.25401496  | -0.35039710 |
| C | -1.73861164 | -0.90767314 | -4.97832883 |
| H | 4.36370733  | 3.03805067  | -4.86758368 |
| H | 3.52161856  | 1.31748785  | -6.41022769 |
| H | -3.29991011 | 2.16278474  | 0.29199696  |

|    |             |             |             |
|----|-------------|-------------|-------------|
| H  | -4.14199888 | 0.44222193  | -1.25064705 |
| H  | 2.73358855  | 5.09970567  | -0.85084490 |
| H  | 0.66077818  | 4.86296887  | 0.54468826  |
| H  | -0.43906973 | -1.38269627 | -6.66291899 |
| H  | -2.51188010 | -1.61943308 | -5.26738583 |
| H  | 4.07154261  | 4.44032044  | -2.80642413 |
| H  | -1.51926465 | 3.80179129  | 0.95762348  |
| H  | 1.74097310  | -0.32151870 | -7.07585421 |
| H  | -3.84983417 | -0.96004784 | -3.31180660 |
| Cs | 0.20465800  | 0.10074000  | 0.48149700  |

181

n = 5, Energy = -537.44447956

|   |             |             |             |
|---|-------------|-------------|-------------|
| C | 1.49843275  | 2.83312137  | -3.37448664 |
| C | -0.53510387 | 0.95119175  | -2.75105325 |
| C | 0.15338015  | 3.26386726  | -3.22720611 |
| C | 1.82671704  | 1.46141067  | -3.21005047 |
| C | -0.86338816 | 2.32290245  | -2.91548941 |
| C | 0.80994873  | 0.52044586  | -2.89833378 |
| C | 2.51520107  | 3.77408619  | -3.68620333 |
| C | -0.17490414 | 4.63557797  | -3.39164227 |
| C | 3.17176964  | 1.03066478  | -3.35733100 |
| C | -1.55187219 | 0.01022693  | -2.43933656 |
| C | -2.20844076 | 2.75364834  | -2.76820888 |
| C | 1.13823302  | -0.85126484 | -2.73389762 |
| C | 0.84186417  | 5.57654278  | -3.70335896 |
| C | 4.18853796  | 1.97162960  | -3.66904770 |
| C | -3.22520908 | 1.81268353  | -2.45649219 |

|   |             |             |             |
|---|-------------|-------------|-------------|
| C | 0.12146470  | -1.79222966 | -2.42218093 |
| C | 2.18691682  | 5.14579693  | -3.85063950 |
| C | 3.86025371  | 3.34334034  | -3.83348387 |
| C | -2.89692483 | 0.44097278  | -2.29205602 |
| C | -1.22358794 | -1.36148381 | -2.27490038 |
| C | -1.51995658 | 5.06632368  | -3.24436174 |
| C | 3.50005377  | -0.34104575 | -3.19289484 |
| C | -2.53672489 | 4.12535887  | -2.93264504 |
| C | 2.48328546  | -1.28201056 | -2.88117815 |
| H | 2.96739387  | 5.86808679  | -4.08991498 |
| H | 4.64073076  | 4.06563019  | -4.07275935 |
| H | -3.67740188 | -0.28131707 | -2.05278054 |
| H | -2.00406499 | -2.08377366 | -2.03562491 |
| H | -1.77194949 | 6.11925663  | -3.37058387 |
| H | -3.56919493 | 4.45600189  | -2.81959167 |
| H | 4.53252381  | -0.67168876 | -3.30594821 |
| H | 2.73527837  | -2.33494351 | -2.75495602 |
| H | 0.58987147  | 6.62947560  | -3.82958110 |
| H | -4.25767900 | 2.14332633  | -2.34343880 |
| H | 5.22100788  | 1.64098679  | -3.78210108 |
| H | 0.37345741  | -2.84516248 | -2.29595878 |
| C | -2.11312102 | -0.51607801 | -5.85788492 |
| C | 0.68504899  | -0.48537355 | -6.34255116 |
| C | -1.46471555 | 0.70068167  | -6.19768824 |
| C | -1.36244148 | -1.71748546 | -5.76041472 |
| C | -0.06563055 | 0.71603391  | -6.44002136 |
| C | 0.03664352  | -1.70213323 | -6.00274784 |



|   |             |             |             |
|---|-------------|-------------|-------------|
| C | -3.51220602 | -0.53143024 | -5.61555179 |
| C | -2.21539509 | 1.90208913  | -6.29515843 |
| C | -2.01084694 | -2.93424515 | -5.42061140 |
| C | 2.08413399  | -0.47002132 | -6.58488429 |
| C | 0.58277492  | 1.93279359  | -6.77982468 |
| C | 0.78732306  | -2.90354069 | -5.90527765 |
| C | -3.61448009 | 1.88673690  | -6.05282531 |
| C | -3.40993195 | -2.94959738 | -5.17827828 |
| C | 1.98185992  | 1.94814582  | -7.02215781 |
| C | 2.18640806  | -2.88818845 | -6.14761077 |
| C | -4.26288561 | 0.66997721  | -5.71302198 |
| C | -4.16061154 | -1.74818993 | -5.27574846 |
| C | 2.73253952  | 0.74673837  | -6.92468762 |
| C | 2.83481359  | -1.67142877 | -6.48741410 |
| C | -1.56698961 | 3.11884858  | -6.63496171 |
| C | -1.26016742 | -4.13565237 | -5.32314124 |
| C | -0.16790461 | 3.13420081  | -6.87729484 |
| C | 0.13891759  | -4.12030014 | -5.56547437 |
| H | -5.33683109 | 0.65819275  | -5.52700572 |
| H | -5.23455702 | -1.75997439 | -5.08973220 |
| H | 3.80648499  | 0.75852283  | -7.11070388 |
| H | 3.90875907  | -1.65964431 | -6.67343036 |
| H | -2.14321549 | 4.04105580  | -6.70978040 |
| H | 0.32981511  | 4.06819250  | -7.13812980 |
| H | -1.75788713 | -5.06964405 | -5.06230628 |
| H | 0.71514346  | -5.04250736 | -5.49065568 |
| H | -4.19070602 | 2.80894388  | -6.12764394 |

|   |             |             |             |
|---|-------------|-------------|-------------|
| H | 2.47957971  | 2.88213727  | -7.28299274 |
| H | -3.90765173 | -3.88358883 | -4.91744334 |
| H | 2.76263399  | -3.81039544 | -6.07279214 |
| C | 2.19216472  | 2.03973093  | 2.39903101  |
| C | 0.65977726  | 2.01031938  | 4.78995617  |
| C | 2.67513630  | 1.35168833  | 3.54346795  |
| C | 0.94299941  | 2.71306775  | 2.45005665  |
| C | 1.90894257  | 1.33698256  | 4.73893053  |
| C | 0.17680568  | 2.69836198  | 3.64551923  |
| C | 2.95835845  | 2.05443670  | 1.20356843  |
| C | 3.92430162  | 0.67835151  | 3.49244231  |
| C | 0.46002783  | 3.40111035  | 1.30561971  |
| C | -0.10641647 | 1.99561361  | 5.98541875  |
| C | 2.39191416  | 0.64893996  | 5.88336747  |
| C | -1.07235964 | 3.37169880  | 3.69654487  |
| C | 4.69049535  | 0.69305728  | 2.29697973  |
| C | 1.22622156  | 3.41581612  | 0.11015713  |
| C | 1.62572042  | 0.63423419  | 7.07883005  |
| C | -1.83855337 | 3.35699303  | 4.89200745  |
| C | 4.20752380  | 1.38109988  | 1.15254274  |
| C | 2.47538690  | 2.74247930  | 0.05913144  |
| C | 0.37655508  | 1.30757101  | 7.12985574  |
| C | -1.35558182 | 2.66895043  | 6.03644444  |
| C | 4.40727303  | -0.00969096 | 4.63687914  |
| C | -0.78913732 | 4.07444704  | 1.35664545  |
| C | 3.64107930  | -0.02439673 | 5.83234172  |
| C | -1.55533105 | 4.05974127  | 2.55210804  |

|   |             |             |             |
|---|-------------|-------------|-------------|
| H | 4.79565840  | 1.39238811  | 0.23489897  |
| H | 3.06352150  | 2.75376753  | -0.85851233 |
| H | -0.21157952 | 1.29628278  | 8.04749951  |
| H | -1.94371641 | 2.65766220  | 6.95408821  |
| H | 5.36613945  | -0.52654815 | 4.59771159  |
| H | 4.01181106  | -0.55254216 | 6.71081804  |
| H | -1.15986908 | 4.60259247  | 0.47816914  |
| H | -2.51419747 | 4.57659846  | 2.59127559  |
| H | 5.64936163  | 0.17620022  | 2.25781202  |
| H | 1.99645198  | 0.10608889  | 7.95730631  |
| H | 0.85549000  | 3.94396142  | -0.76831913 |
| H | -2.79741965 | 3.87385009  | 4.93117516  |
| C | 4.40018898  | 4.73379088  | 3.28927306  |
| C | 2.27771962  | 6.26074917  | 2.18061544  |
| C | 3.28656694  | 5.09111188  | 4.09461009  |
| C | 4.45257634  | 5.13994903  | 1.92960722  |
| C | 2.22533226  | 5.85459102  | 3.54028128  |
| C | 3.39134166  | 5.90342817  | 1.37527841  |
| C | 5.46142366  | 3.97031174  | 3.84360187  |
| C | 3.23417958  | 4.68495373  | 5.45427593  |
| C | 5.56619838  | 4.78262803  | 1.12427019  |
| C | 1.21648494  | 7.02422831  | 1.62628663  |
| C | 1.11171022  | 6.21191201  | 4.34561831  |
| C | 3.44372902  | 6.30958632  | 0.01561257  |
| C | 4.29541426  | 3.92147459  | 6.00860474  |
| C | 6.62743306  | 4.01914889  | 1.67859900  |
| C | 0.05047554  | 6.97539116  | 3.79128950  |

|   |             |             |             |
|---|-------------|-------------|-------------|
| C | 2.38249434  | 7.07306546  | -0.53871625 |
| C | 5.40903635  | 3.56415357  | 5.20326774  |
| C | 6.57504575  | 3.61299072  | 3.03826486  |
| C | 0.10286285  | 7.38154933  | 2.43162363  |
| C | 1.26887225  | 7.43038648  | 0.26662076  |
| C | 2.12055765  | 5.04227473  | 6.25961275  |
| C | 5.61858563  | 5.18878618  | -0.23539544 |
| C | 1.05932297  | 5.80575387  | 5.70528394  |
| C | 4.55735095  | 5.95226532  | -0.78972426 |
| H | 6.22364603  | 2.97810270  | 5.62877363  |
| H | 7.38965543  | 3.02693985  | 3.46377076  |
| H | -0.71174683 | 7.96760019  | 2.00611774  |
| H | 0.45426257  | 8.01643734  | -0.15888514 |
| H | 2.08034480  | 4.73050543  | 7.30330001  |
| H | 0.20450035  | 6.08003550  | 6.32346526  |
| H | 6.47340825  | 4.91450455  | -0.85357676 |
| H | 4.59756380  | 6.26403462  | -1.83341151 |
| H | 4.25520157  | 3.60970526  | 7.05229182  |
| H | -0.80434702 | 7.24967282  | 4.40947058  |
| H | 7.48225562  | 3.74486723  | 1.06041792  |
| H | 2.42270703  | 7.38483478  | -1.58240332 |
| C | -2.85229073 | -3.29438382 | 0.23283809  |
| C | -0.37594810 | -3.09112524 | 1.60834259  |
| C | -1.74372033 | -4.07937077 | -0.18100638 |
| C | -2.72268981 | -2.40776758 | 1.33443481  |
| C | -0.50554901 | -3.97774147 | 0.50674587  |
| C | -1.48451849 | -2.30613829 | 2.02218706  |

|   |             |             |             |
|---|-------------|-------------|-------------|
| C | -4.09046205 | -3.39601311 | -0.45491416 |
| C | -1.87332125 | -4.96598700 | -1.28260310 |
| C | -3.83126021 | -1.62278064 | 1.74827928  |
| C | 0.86222322  | -2.98949594 | 2.29609484  |
| C | 0.60302139  | -4.76272842 | 0.09290140  |
| C | -1.35491758 | -1.41952206 | 3.12378377  |
| C | -3.11149256 | -5.06761629 | -1.97035534 |
| C | -5.06943153 | -1.72440993 | 1.06052703  |
| C | 1.84119270  | -4.66109913 | 0.78065365  |
| C | -0.11674626 | -1.31789276 | 3.81153602  |
| C | -4.22006302 | -4.28262935 | -1.55651090 |
| C | -5.19903250 | -2.61102617 | -0.04106972 |
| C | 1.97079367  | -3.77448288 | 1.88225040  |
| C | 0.99182419  | -2.10287970 | 3.39769158  |
| C | -0.76475094 | -5.75097378 | -1.69644742 |
| C | -3.70165920 | -0.73616457 | 2.84987585  |
| C | 0.47342037  | -5.64934449 | -1.00869517 |
| C | -2.46348788 | -0.63453527 | 3.53762810  |
| H | -5.17049025 | -4.36064057 | -2.08443338 |
| H | -6.14945973 | -2.68903739 | -0.56899219 |
| H | 2.92122090  | -3.69647167 | 2.41017287  |
| H | 1.94225142  | -2.02486849 | 3.92561406  |
| H | -0.86423333 | -6.43154547 | -2.54203934 |
| H | 1.32436532  | -6.25190495 | -1.32636456 |
| H | -4.55260415 | -0.13360410 | 3.16754524  |
| H | -2.36400549 | 0.04603641  | 4.38322002  |
| H | -3.21097510 | -5.74818782 | -2.81594715 |

|    |             |             |            |
|----|-------------|-------------|------------|
| H  | 2.69213761  | -5.26365942 | 0.46298444 |
| H  | -5.92037643 | -1.12184964 | 1.37819624 |
| H  | -0.01726373 | -0.63732124 | 4.65712783 |
| Cs | 0.20465800  | 0.10074000  | 0.48149700 |

217

n = 6, Energy = -634.19742408

|   |             |             |             |
|---|-------------|-------------|-------------|
| C | 1.01630035  | -3.24161499 | -5.43277281 |
| C | 3.22359064  | -1.45538678 | -5.37931352 |
| C | 0.87305024  | -1.92073877 | -5.93393695 |
| C | 2.26319562  | -3.66937710 | -4.90487902 |
| C | 1.97669538  | -1.02762467 | -5.90720731 |
| C | 3.36684076  | -2.77626300 | -4.87814938 |
| C | -0.08734479 | -4.13472909 | -5.45950245 |
| C | -0.37384503 | -1.49297665 | -6.46183074 |
| C | 2.40644574  | -4.99025332 | -4.40371488 |
| C | 4.32723579  | -0.56227268 | -5.35258388 |
| C | 1.83344526  | 0.29325155  | -6.40837145 |
| C | 4.61373603  | -3.20402512 | -4.35025559 |
| C | -1.47749017 | -2.38609076 | -6.48856038 |
| C | 1.30280059  | -5.88336742 | -4.43044452 |
| C | 2.93709041  | 1.18636565  | -6.38164181 |
| C | 5.71738117  | -2.31091102 | -4.32352595 |
| C | -1.33424010 | -3.70696701 | -5.98739624 |
| C | 0.05590528  | -5.45560534 | -4.95833831 |
| C | 4.18398572  | 0.75860357  | -5.85374802 |
| C | 5.57413110  | -0.99003476 | -4.82469009 |
| C | -0.51709501 | -0.17210061 | -6.96299478 |

|   |             |             |             |
|---|-------------|-------------|-------------|
| C | 3.65334087  | -5.41801527 | -3.87582119 |
| C | 0.58655013  | 0.72101350  | -6.93626514 |
| C | 4.75698601  | -4.52490117 | -3.84909155 |
| H | -2.18140429 | -4.39252639 | -6.00791406 |
| H | -0.79125891 | -6.14116473 | -4.97885613 |
| H | 5.03114991  | 1.44416295  | -5.83323020 |
| H | 6.42129529  | -0.30447538 | -4.80417227 |
| H | -1.47421892 | 0.15625205  | -7.36820906 |
| H | 0.47659050  | 1.73492561  | -7.32096159 |
| H | 3.76330049  | -6.43192738 | -3.49112474 |
| H | 5.71410992  | -4.85325382 | -3.44387727 |
| H | -2.43461399 | -2.05773831 | -6.89377456 |
| H | 2.82713096  | 2.20027763  | -6.76633816 |
| H | 1.41276004  | -6.89727941 | -4.04574817 |
| H | 6.67450499  | -2.63926347 | -3.91831177 |
| C | 0.79447082  | -0.64666448 | 3.74688713  |
| C | -0.05915395 | 1.77555763  | 4.95922548  |
| C | -0.37589612 | -0.62904019 | 4.55083408  |
| C | 1.53802537  | 0.54682228  | 3.54910936  |
| C | -0.80270850 | 0.58207087  | 5.15700326  |
| C | 1.11121298  | 1.75793334  | 4.15527854  |
| C | 1.22128321  | -1.85777554 | 3.14071796  |
| C | -1.11945067 | -1.82252696 | 4.74861185  |
| C | 2.70839230  | 0.52919799  | 2.74516241  |
| C | -0.48596634 | 2.98666869  | 5.56539466  |
| C | -1.97307544 | 0.59969516  | 5.96095021  |
| C | 1.85476753  | 2.95142011  | 3.95750076  |

|   |             |             |            |
|---|-------------|-------------|------------|
| C | -0.69263828 | -3.03363802 | 4.14244268 |
| C | 3.13520469  | -0.68191306 | 2.13899323 |
| C | -2.39988783 | 1.81080622  | 6.56711938 |
| C | 1.42795514  | 4.16253117  | 4.56366994 |
| C | 0.47772868  | -3.05126236 | 3.33849570 |
| C | 2.39165016  | -1.87539988 | 2.33677098 |
| C | -1.65633330 | 3.00429303  | 6.36934163 |
| C | 0.25758819  | 4.18015551  | 5.36761691 |
| C | -2.28981742 | -1.80490255 | 5.55255871 |
| C | 3.45194667  | 1.72268465  | 2.54738473 |
| C | -2.71662980 | -0.59379149 | 6.15872788 |
| C | 3.02513428  | 2.93379570  | 3.15355391 |
| H | 0.80535225  | -3.98091798 | 2.87319685 |
| H | 2.71927374  | -2.80505551 | 1.87147213 |
| H | -1.98395687 | 3.93394866  | 6.83464049 |
| H | -0.07003539 | 5.10981113  | 5.83291577 |
| H | -2.86057414 | -2.72102979 | 5.70437406 |
| H | -3.61501014 | -0.58026301 | 6.77584214 |
| H | 4.35032700  | 1.70915616  | 1.93027047 |
| H | 3.59589100  | 3.84992294  | 3.00173855 |
| H | -1.26339480 | -3.94976519 | 4.29425791 |
| H | -3.29826800 | 1.82433487  | 7.18423357 |
| H | 4.03358486  | -0.69544172 | 1.52187904 |
| H | 1.99871166  | 5.07865834  | 4.41185470 |
| C | 4.76550941  | -0.78384252 | 5.30805718 |
| C | 2.46929287  | -1.66606947 | 6.72744603 |
| C | 4.35200988  | -2.13926648 | 5.21726025 |



|   |             |             |            |
|---|-------------|-------------|------------|
| C | 4.03090067  | 0.13046798  | 6.10854854 |
| C | 3.20390160  | -2.58037996 | 5.92695468 |
| C | 2.88279240  | -0.31064550 | 6.81824296 |
| C | 5.91361768  | -0.34272904 | 4.59836276 |
| C | 5.08661861  | -3.05357697 | 4.41676890 |
| C | 4.44440021  | 1.48589194  | 6.19934546 |
| C | 1.32118459  | -2.10718294 | 7.43714046 |
| C | 2.79040207  | -3.93580392 | 5.83615775 |
| C | 2.14818366  | 0.60366499  | 7.61873431 |
| C | 6.23472689  | -2.61246350 | 3.70707448 |
| C | 5.59250848  | 1.92700542  | 5.48965104 |
| C | 1.64229380  | -4.37691740 | 6.54585217 |
| C | 1.00007539  | 0.16255151  | 8.32842874 |
| C | 6.64822647  | -1.25703951 | 3.79787138 |
| C | 6.32711726  | 1.01269495  | 4.68915966 |
| C | 0.90768501  | -3.46260693 | 7.34634356 |
| C | 0.58657581  | -1.19287247 | 8.23763184 |
| C | 4.67311905  | -4.40900072 | 4.32597206 |
| C | 3.70979150  | 2.40020221  | 6.99983673 |
| C | 3.52501078  | -4.85011420 | 5.03566648 |
| C | 2.56168323  | 1.95908874  | 7.70953116 |
| H | 7.52952080  | -0.91843834 | 3.25310597 |
| H | 7.20841160  | 1.35129612  | 4.14439425 |
| H | 0.02639068  | -3.80120810 | 7.89110897 |
| H | -0.29471853 | -1.53147364 | 8.78239725 |
| H | 5.23700889  | -5.11083068 | 3.71151034 |
| H | 3.20760619  | -5.89054537 | 4.96597023 |

|   |             |             |             |
|---|-------------|-------------|-------------|
| H | 4.02719609  | 3.44063338  | 7.06953298  |
| H | 1.99779338  | 2.66091870  | 8.32399288  |
| H | 6.79861675  | -3.31429322 | 3.09261281  |
| H | 1.32488913  | -5.41734837 | 6.47615604  |
| H | 5.90991315  | 2.96743639  | 5.55934718  |
| H | 0.43618553  | 0.86438124  | 8.94289040  |
| C | -5.25219872 | 4.04878449  | 0.20910027  |
| C | -6.30594857 | 1.90396402  | 1.74368683  |
| C | -5.06765705 | 4.02522522  | 1.61686069  |
| C | -5.96361531 | 2.99993352  | -0.43136688 |
| C | -5.59453198 | 2.95281498  | 2.38415397  |
| C | -6.49049024 | 1.92752329  | 0.33592640  |
| C | -4.72532379 | 5.12119472  | -0.55819301 |
| C | -4.35624046 | 5.07407618  | 2.25732784  |
| C | -6.14815697 | 3.02349279  | -1.83912730 |
| C | -6.83282350 | 0.83155378  | 2.51098010  |
| C | -5.40999032 | 2.92925571  | 3.79191440  |
| C | -7.20190683 | 0.87867233  | -0.30454074 |
| C | -3.82936553 | 6.14648642  | 1.49003456  |
| C | -5.62128204 | 4.09590303  | -2.60642058 |
| C | -5.93686525 | 1.85684548  | 4.55920767  |
| C | -7.72878176 | -0.19373791 | 0.46275253  |
| C | -4.01390717 | 6.17004573  | 0.08227410  |
| C | -4.90986543 | 5.14475404  | -1.96595347 |
| C | -6.64828186 | 0.80799447  | 3.91874056  |
| C | -7.54424012 | -0.21729723 | 1.87051299  |
| C | -4.17169888 | 5.05051681  | 3.66508806  |

|   |             |             |             |
|---|-------------|-------------|-------------|
| C | -6.85957348 | 1.97464193  | -2.47959425 |
| C | -4.69857381 | 3.97810658  | 4.43238134  |
| C | -7.38644841 | 0.90223170  | -1.71230097 |
| H | -3.60947503 | 6.99323383  | -0.50670451 |
| H | -4.50543328 | 5.96794214  | -2.55493208 |
| H | -7.05271401 | -0.01519363 | 4.50771918  |
| H | -7.94867226 | -1.04048532 | 2.45949161  |
| H | -3.62561145 | 5.85562078  | 4.15671431  |
| H | -4.55691857 | 3.96002236  | 5.51298627  |
| H | -7.00122872 | 1.99272614  | -3.56019918 |
| H | -7.93253584 | 0.09712772  | -2.20392722 |
| H | -3.28327817 | 6.95159034  | 1.98166058  |
| H | -5.79521011 | 1.83876112  | 5.63981244  |
| H | -5.76293718 | 4.11398739  | -3.68702534 |
| H | -8.27486912 | -0.99884183 | -0.02887349 |
| C | 2.83646456  | -0.65003245 | -1.86863231 |
| C | 2.86535570  | -3.31003885 | -0.87408179 |
| C | 1.67406444  | -1.45914066 | -1.97144265 |
| C | 4.01331024  | -1.17092744 | -1.26854672 |
| C | 1.68851002  | -2.78914386 | -1.47416739 |
| C | 4.02775581  | -2.50093064 | -0.77127146 |
| C | 2.82201898  | 0.67997076  | -2.36590757 |
| C | 0.49721876  | -0.93824566 | -2.57152824 |
| C | 5.17571035  | -0.36181923 | -1.16573639 |
| C | 2.87980127  | -4.64004205 | -0.37680653 |
| C | 0.52610991  | -3.59825207 | -1.57697772 |
| C | 5.20460150  | -3.02182564 | -0.17118587 |

|   |             |             |             |
|---|-------------|-------------|-------------|
| C | 0.48277319  | 0.39175754  | -3.06880350 |
| C | 5.16126478  | 0.96818397  | -1.66301165 |
| C | 0.54055548  | -4.92825527 | -1.07970246 |
| C | 5.21904707  | -4.35182884 | 0.32608939  |
| C | 1.64517330  | 1.20086581  | -2.96599319 |
| C | 3.98441909  | 1.48907902  | -2.26309726 |
| C | 1.71740116  | -5.44915032 | -0.47961685 |
| C | 4.05664696  | -5.16093710 | 0.22327908  |
| C | -0.66518112 | -1.74735384 | -2.67433850 |
| C | 6.35255581  | -0.88271425 | -0.56565086 |
| C | -0.65073555 | -3.07735705 | -2.17706325 |
| C | 6.36700138  | -2.21271746 | -0.06837560 |
| H | 1.63408480  | 2.22178371  | -3.34770446 |
| H | 3.97333059  | 2.50999692  | -2.64480853 |
| H | 1.72848967  | -6.47006822 | -0.09790558 |
| H | 4.06773546  | -6.18185501 | 0.60499035  |
| H | -1.56853459 | -1.34751189 | -3.13496763 |
| H | -1.54300051 | -3.69843311 | -2.25598105 |
| H | 7.24482077  | -0.26163819 | -0.48673305 |
| H | 7.27035485  | -2.61255941 | 0.39225352  |
| H | -0.42058005 | 0.79159958  | -3.52943257 |
| H | -0.35170926 | -5.54933136 | -1.15862018 |
| H | 6.05352951  | 1.58926006  | -1.58409393 |
| H | 6.12240031  | -4.75167087 | 0.78671847  |
| C | -3.12000994 | 1.19617539  | -2.80631347 |
| C | -2.90924014 | 1.08193504  | 0.02354956  |
| C | -3.68814590 | 0.10607833  | -2.09546185 |

|   |             |             |             |
|---|-------------|-------------|-------------|
| C | -2.44648908 | 2.22915226  | -2.10223357 |
| C | -3.58276100 | 0.04895816  | -0.68053033 |
| C | -2.34110418 | 2.17203209  | -0.68730206 |
| C | -3.22539483 | 1.25329556  | -4.22124498 |
| C | -4.36166676 | -0.92689855 | -2.79954174 |
| C | -1.87835312 | 3.31924932  | -2.81308519 |
| C | -2.80385525 | 1.02481486  | 1.43848107  |
| C | -4.15089696 | -1.04113889 | 0.03032128  |
| C | -1.66758333 | 3.20500897  | 0.01677784  |
| C | -4.46705165 | -0.86977837 | -4.21447326 |
| C | -1.98373801 | 3.37636949  | -4.22801670 |
| C | -4.04551207 | -1.09825907 | 1.44525280  |
| C | -1.56219843 | 3.14788880  | 1.43170935  |
| C | -3.89891569 | 0.22031868  | -4.92532493 |
| C | -2.65725888 | 2.34339261  | -4.93209666 |
| C | -3.37199121 | -0.06528219 | 2.14933275  |
| C | -2.13033439 | 2.05779174  | 2.14256103  |
| C | -4.92980260 | -2.01699539 | -2.08869013 |
| C | -1.20483238 | 4.35222599  | -2.10900529 |
| C | -4.82441770 | -2.07411557 | -0.67375861 |
| C | -1.09944749 | 4.29510582  | -0.69407378 |
| H | -3.97980973 | 0.26416445  | -6.01143428 |
| H | -2.73815291 | 2.38723838  | -6.01820600 |
| H | -3.29109717 | -0.10912796 | 3.23544210  |
| H | -2.04944035 | 2.01394598  | 3.22867038  |
| H | -5.44680105 | -2.80991434 | -2.62914585 |
| H | -5.26052211 | -2.91088029 | -0.12810487 |

|    |             |             |             |
|----|-------------|-------------|-------------|
| H  | -0.76872797 | 5.18899071  | -2.65465903 |
| H  | -0.58244903 | 5.08802477  | -0.15361805 |
| H  | -4.98404999 | -1.66269712 | -4.75492904 |
| H  | -4.48161635 | -1.93502359 | 1.99090659  |
| H  | -1.54763373 | 4.21313401  | -4.77367050 |
| H  | -1.04520009 | 3.94080754  | 1.97216514  |
| Cs | 0.20465800  | 0.10074000  | 0.48149700  |

253

n = 7, Energy = -716.07146704

|   |             |             |             |
|---|-------------|-------------|-------------|
| C | -6.03188870 | 1.87441555  | -1.33413208 |
| C | -5.98996333 | 2.78407097  | 1.35591788  |
| C | -6.51880351 | 1.03879407  | -0.29439616 |
| C | -5.52401120 | 3.16486474  | -1.02884302 |
| C | -6.49784082 | 1.49362178  | 1.05062882  |
| C | -5.50304852 | 3.61969245  | 0.31618196  |
| C | -6.05285139 | 1.41958784  | -2.67915706 |
| C | -7.02668100 | -0.25165512 | -0.59968522 |
| C | -5.03709639 | 4.00048623  | -2.06857894 |
| C | -5.96900064 | 3.23889868  | 2.70094286  |
| C | -6.98475563 | 0.65800030  | 2.09036474  |
| C | -4.99517102 | 4.91014165  | 0.62147102  |
| C | -7.04764369 | -0.70648283 | -1.94471020 |
| C | -5.05805908 | 3.54565852  | -3.41360392 |
| C | -6.96379294 | 1.11282801  | 3.43538972  |
| C | -4.97420833 | 5.36496936  | 1.96649600  |
| C | -6.56072888 | 0.12913863  | -2.98444618 |
| C | -5.56593658 | 2.25520931  | -3.71889304 |

|   |             |             |             |
|---|-------------|-------------|-------------|
| C | -6.45591545 | 2.40327722  | 3.74067884  |
| C | -5.46112314 | 4.52934789  | 3.00623198  |
| C | -7.51359572 | -1.08727640 | 0.44005063  |
| C | -4.52921900 | 5.29093521  | -1.76328981 |
| C | -7.49263303 | -0.63244869 | 1.78507561  |
| C | -4.50825631 | 5.74576292  | -0.41826483 |
| H | -6.57681996 | -0.21998966 | -4.01689488 |
| H | -5.58202765 | 1.90608101  | -4.75134174 |
| H | -6.43982437 | 2.75240552  | 4.77312754  |
| H | -5.44503207 | 4.87847619  | 4.03868068  |
| H | -7.90344538 | -2.07783256 | 0.20570902  |
| H | -7.86639162 | -1.27387651 | 2.58318282  |
| H | -4.15546041 | 5.93236304  | -2.56139702 |
| H | -4.11840664 | 6.73631908  | -0.18392323 |
| H | -7.43749326 | -1.69703881 | -2.17905193 |
| H | -7.33755143 | 0.47140041  | 4.23349692  |
| H | -4.68430059 | 4.18708612  | -4.21171112 |
| H | -4.58435876 | 6.35552533  | 2.20083773  |
| C | 0.61621501  | -6.66008093 | -0.19694912 |
| C | 2.58250595  | -5.68874736 | -2.00133560 |
| C | 1.96628598  | -6.53388723 | 0.22469481  |
| C | 0.24928951  | -6.30060785 | -1.52078630 |
| C | 2.94943145  | -6.04822045 | -0.67749843 |
| C | 1.23243498  | -5.81494106 | -2.42297954 |
| C | -0.36693046 | -7.14574771 | 0.70524412  |
| C | 2.33321148  | -6.89336031 | 1.54853198  |
| C | -1.10078146 | -6.42680155 | -1.94243023 |

|   |             |             |             |
|---|-------------|-------------|-------------|
| C | 3.56565142  | -5.20308058 | -2.90352884 |
| C | 4.29950242  | -5.92202675 | -0.25585450 |
| C | 0.86550948  | -5.45546798 | -3.74681671 |
| C | 1.35006601  | -7.37902709 | 2.45072522  |
| C | -2.08392693 | -6.91246833 | -1.04023699 |
| C | 5.28264789  | -5.43635996 | -1.15804774 |
| C | 1.84865495  | -4.96980120 | -4.64900995 |
| C | -0.00000500 | -7.50522081 | 2.02908133  |
| C | -1.71700147 | -7.27194143 | 0.28360022  |
| C | 4.91572243  | -5.07688686 | -2.48188495 |
| C | 3.19872596  | -4.84360748 | -4.22736605 |
| C | 3.68328228  | -6.76716658 | 1.97017574  |
| C | -1.46770679 | -6.06732849 | -3.26626723 |
| C | 4.66642775  | -6.28149980 | 1.06798250  |
| C | -0.48456132 | -5.58166171 | -4.16846047 |
| H | -0.75467296 | -7.87802135 | 2.72160991  |
| H | -2.47166943 | -7.64474197 | 0.97612880  |
| H | 5.67039039  | -4.70408632 | -3.17441353 |
| H | 3.95339392  | -4.47080694 | -4.91989464 |
| H | 3.96493641  | -7.04310017 | 2.98636070  |
| H | 5.70274992  | -6.18463281 | 1.39163881  |
| H | -2.50402896 | -6.16419548 | -3.58992354 |
| H | -0.76621545 | -5.30572812 | -5.18464543 |
| H | 1.63171993  | -7.65496067 | 3.46691005  |
| H | 6.31896993  | -5.33949292 | -0.83439164 |
| H | -3.12024897 | -7.00933537 | -1.36389308 |
| H | 1.56700103  | -4.69386762 | -5.66519478 |



|   |             |             |             |
|---|-------------|-------------|-------------|
| C | 2.45263226  | 2.58884171  | -5.35898921 |
| C | 0.12200473  | 1.18053637  | -6.16549456 |
| C | 2.54297748  | 1.22218476  | -5.73380464 |
| C | 1.19697328  | 3.25134599  | -5.38742645 |
| C | 1.37766371  | 0.51803209  | -6.13705732 |
| C | 0.03165951  | 2.54719332  | -5.79067913 |
| C | 3.61794603  | 3.29299438  | -4.95573654 |
| C | 3.79863646  | 0.55968048  | -5.70536740 |
| C | 1.10662807  | 4.61800293  | -5.01261102 |
| C | -1.04330904 | 0.47638370  | -6.56874723 |
| C | 1.46800892  | -0.84862485 | -6.51187275 |
| C | -1.22399947 | 3.20969760  | -5.81911637 |
| C | 4.96395023  | 1.26383315  | -5.30211473 |
| C | 2.27194184  | 5.32215560  | -4.60935834 |
| C | 0.30269516  | -1.55277752 | -6.91512542 |
| C | -2.38931324 | 2.50554493  | -6.22236904 |
| C | 4.87360506  | 2.63049013  | -4.92729928 |
| C | 3.52760087  | 4.65965135  | -4.58092109 |
| C | -0.95296388 | -0.89027327 | -6.94356268 |
| C | -2.29896807 | 1.13888795  | -6.59718449 |
| C | 3.88898154  | -0.80697627 | -6.08018280 |
| C | -0.14903078 | 5.28050702  | -5.04104829 |
| C | 2.72366778  | -1.51112893 | -6.48343547 |
| C | -1.31434455 | 4.57635435  | -5.44430097 |
| H | 5.76810643  | 3.17100166  | -4.61776027 |
| H | 4.42210224  | 5.20016288  | -4.27138208 |
| H | -1.84746525 | -1.43078480 | -7.25310169 |

|   |             |             |             |
|---|-------------|-------------|-------------|
| H | -3.19346944 | 0.59837642  | -6.90672350 |
| H | 4.85283253  | -1.31551835 | -6.05835422 |
| H | 2.79301730  | -2.56018260 | -6.77114593 |
| H | -0.21838030 | 6.32956068  | -4.75333783 |
| H | -2.27819554 | 5.08489643  | -5.46612955 |
| H | 5.92780114  | 0.75529130  | -5.28028609 |
| H | 0.37204450  | -2.60183102 | -7.20283587 |
| H | 2.20259250  | 6.37120910  | -4.32164790 |
| H | -3.35316414 | 3.01408678  | -6.24419767 |
| C | 4.20821060  | -2.53273408 | 1.18934991  |
| C | 1.46304097  | -2.99289182 | 0.62552545  |
| C | 3.69298228  | -2.25562150 | -0.10453898 |
| C | 3.35085411  | -3.03992552 | 2.20132657  |
| C | 2.32039746  | -2.48570037 | -0.38645121 |
| C | 1.97826929  | -3.27000440 | 1.91941434  |
| C | 5.58079542  | -2.30265521 | 1.47126214  |
| C | 4.55033877  | -1.74843006 | -1.11651564 |
| C | 3.86608244  | -3.31703810 | 3.49521546  |
| C | 0.09045615  | -3.22297069 | 0.34361321  |
| C | 1.80516913  | -2.20858780 | -1.68034011 |
| C | 1.12091280  | -3.77719584 | 2.93139100  |
| C | 5.92292359  | -1.51835119 | -0.83460341 |
| C | 5.23866726  | -3.08695923 | 3.77712770  |
| C | 0.43258431  | -2.43866667 | -1.96225234 |
| C | -0.25167201 | -4.00727471 | 2.64947877  |
| C | 6.43815197  | -1.79546375 | 0.45928550  |
| C | 6.09602381  | -2.57976777 | 2.76515105  |

|   |             |             |             |
|---|-------------|-------------|-------------|
| C | -0.42477224 | -2.94585812 | -0.95027569 |
| C | -0.76690040 | -3.73016215 | 1.35558986  |
| C | 4.03511041  | -1.47131756 | -2.41040431 |
| C | 3.00872598  | -3.82422947 | 4.50719190  |
| C | 2.66252559  | -1.70139643 | -2.69231654 |
| C | 1.63614116  | -4.05430834 | 4.22527967  |
| H | 7.49175576  | -1.61885392 | 0.67568290  |
| H | 7.14962760  | -2.40315794 | 2.98154846  |
| H | -1.47837602 | -3.12246795 | -1.16667310 |
| H | -1.82050419 | -3.90677197 | 1.13919245  |
| H | 4.69322213  | -1.08199451 | -3.18720338 |
| H | 2.26703340  | -1.48868323 | -3.68551304 |
| H | 3.40421817  | -4.03694267 | 5.50038840  |
| H | 0.97802945  | -4.44363139 | 5.00207874  |
| H | 6.58103533  | -1.12902821 | -1.61140224 |
| H | 0.03709204  | -2.22595356 | -2.95544863 |
| H | 5.63415954  | -3.29967234 | 4.77032399  |
| H | -0.90978376 | -4.39659769 | 3.42627760  |
| C | 0.02056687  | 4.51134761  | 2.47585021  |
| C | 1.89321058  | 2.38950404  | 2.23797431  |
| C | 0.65456554  | 4.26021625  | 1.23030664  |
| C | 0.32289006  | 3.70155719  | 3.60245584  |
| C | 1.59088739  | 3.19929447  | 1.11136868  |
| C | 1.25921191  | 2.64063540  | 3.48351789  |
| C | -0.91575498 | 5.57226939  | 2.59478817  |
| C | 0.35224235  | 5.07000667  | 0.10370101  |
| C | -0.31110861 | 3.95268855  | 4.84799942  |

|   |             |             |             |
|---|-------------|-------------|-------------|
| C | 2.82953243  | 1.32858226  | 2.11903636  |
| C | 2.22488606  | 2.94816311  | -0.13417490 |
| C | 1.56153510  | 1.83084498  | 4.61012352  |
| C | -0.58407951 | 6.13092845  | 0.22263896  |
| C | -1.24743046 | 5.01361033  | 4.96693737  |
| C | 3.16120791  | 1.88724132  | -0.25311285 |
| C | 2.49785695  | 0.76992320  | 4.49118556  |
| C | -1.21807821 | 6.38205986  | 1.46818255  |
| C | -1.54975369 | 5.82340079  | 3.84033175  |
| C | 3.46353114  | 1.07745086  | 0.87349277  |
| C | 3.13185566  | 0.51879179  | 3.24564198  |
| C | 0.98624098  | 4.81887526  | -1.14184234 |
| C | -0.00878539 | 3.14289818  | 5.97460482  |
| C | 1.92256284  | 3.75795347  | -1.26078029 |
| C | 0.92753646  | 2.08197639  | 5.85566686  |
| H | -1.93680411 | 7.19642936  | 1.55947998  |
| H | -2.26847958 | 6.63777029  | 3.93162919  |
| H | 4.18225703  | 0.26308136  | 0.78219533  |
| H | 3.85058155  | -0.29557770 | 3.15434454  |
| H | 0.75417599  | 5.44047499  | -2.00663126 |
| H | 2.40922382  | 3.56518363  | -2.21686666 |
| H | -0.49544637 | 3.33566803  | 6.93069118  |
| H | 1.15960145  | 1.46037666  | 6.72045578  |
| H | -0.81614457 | 6.75252818  | -0.64214972 |
| H | 3.64786890  | 1.69447138  | -1.20919899 |
| H | -1.73409145 | 5.20638028  | 5.92302351  |
| H | 2.72992201  | 0.14832347  | 5.35597424  |

|   |            |            |             |
|---|------------|------------|-------------|
| C | 4.12628362 | 5.21760574 | 2.74540972  |
| C | 5.95244468 | 3.12269253 | 2.16053883  |
| C | 4.52160565 | 4.31438569 | 3.76732660  |
| C | 4.64404212 | 5.07336919 | 1.43105739  |
| C | 5.43468618 | 3.26692909 | 3.47489115  |
| C | 5.55712265 | 4.02591258 | 1.13862195  |
| C | 3.21320309 | 6.26506234 | 3.03784516  |
| C | 4.00384716 | 4.45862224 | 5.08167892  |
| C | 4.24872009 | 5.97658924 | 0.40914051  |
| C | 6.86552521 | 2.07523593 | 1.86810338  |
| C | 5.83000822 | 2.36370904 | 4.49680803  |
| C | 6.07488115 | 3.88167603 | -0.17573038 |
| C | 3.09076663 | 5.50607885 | 5.37411436  |
| C | 3.33563956 | 7.02404584 | 0.70157596  |
| C | 6.74308875 | 1.31625244 | 4.20437259  |
| C | 6.98796168 | 2.83421943 | -0.46816582 |
| C | 2.69544456 | 6.40929894 | 4.35219750  |
| C | 2.81788102 | 7.16828244 | 2.01592829  |
| C | 7.26084728 | 1.17201584 | 2.89002025  |
| C | 7.38328375 | 1.93099933 | 0.55375105  |
| C | 4.39916920 | 3.55540227 | 6.10359557  |
| C | 4.76647857 | 5.83235261 | -0.90521158 |
| C | 5.31224973 | 2.50794567 | 5.81116013  |
| C | 5.67955910 | 4.78489601 | -1.19764703 |
| H | 1.99455883 | 7.21333249 | 4.57667258  |
| H | 2.11699530 | 7.97231599 | 2.24040338  |
| H | 7.96173301 | 0.36798229 | 2.66554517  |

|   |             |             |             |
|---|-------------|-------------|-------------|
| H | 8.08416947  | 1.12696578  | 0.32927597  |
| H | 4.00173483  | 3.66611905  | 7.11249992  |
| H | 5.61570116  | 1.81462881  | 6.59558937  |
| H | 4.46302714  | 6.52566946  | -1.68964082 |
| H | 6.07699347  | 4.67417922  | -2.20655137 |
| H | 2.69333223  | 5.61679575  | 6.38301850  |
| H | 7.04654023  | 0.62293561  | 4.98880159  |
| H | 3.03218807  | 7.71736266  | -0.08285304 |
| H | 7.38539607  | 2.72350252  | -1.47706995 |
| C | -3.60310531 | -0.68254091 | 1.69090754  |
| C | -3.49136954 | -1.30324931 | -1.07817818 |
| C | -4.02915553 | -1.95670756 | 1.23114604  |
| C | -3.12118720 | 0.28127154  | 0.76612618  |
| C | -3.97328765 | -2.26706176 | -0.15339681 |
| C | -3.06531931 | -0.02908266 | -0.61841668 |
| C | -3.65897319 | -0.37218672 | 3.07545040  |
| C | -4.51107364 | -2.92052001 | 2.15592741  |
| C | -2.69513697 | 1.55543819  | 1.22588767  |
| C | -3.43550166 | -1.61360351 | -2.46272104 |
| C | -4.39933788 | -3.54122841 | -0.61315831 |
| C | -2.58340121 | 0.93472979  | -1.54319805 |
| C | -4.56694153 | -2.61016582 | 3.54047027  |
| C | -2.75100486 | 1.86579238  | 2.61043053  |
| C | -4.34346999 | -3.85158261 | -1.99770117 |
| C | -2.52753332 | 0.62437559  | -2.92774091 |
| C | -4.14089130 | -1.33599915 | 4.00023182  |
| C | -3.23292297 | 0.90197995  | 3.53521195  |

|    |             |             |             |
|----|-------------|-------------|-------------|
| C  | -3.86155188 | -2.88777017 | -2.92248259 |
| C  | -2.95358354 | -0.64979107 | -3.38750246 |
| C  | -4.93712378 | -4.19468645 | 1.69616587  |
| C  | -2.21321895 | 2.51925042  | 0.30110635  |
| C  | -4.88125590 | -4.50504064 | 0.31162301  |
| C  | -2.15735107 | 2.20889622  | -1.08343651 |
| H  | -4.18377580 | -1.09776953 | 5.06301467  |
| H  | -3.27580747 | 1.14020957  | 4.59799480  |
| H  | -3.81866738 | -3.12599979 | -3.98526544 |
| H  | -2.91069904 | -0.88802069 | -4.45028531 |
| H  | -5.30704687 | -4.93451439 | 2.40603330  |
| H  | -5.20829448 | -5.48309824 | -0.04129252 |
| H  | -1.88618036 | 3.49730801  | 0.65402188  |
| H  | -1.78742798 | 2.94872417  | -1.79330394 |
| H  | -4.93686453 | -3.34999353 | 4.25033772  |
| H  | -4.67050849 | -4.82964000 | -2.35061680 |
| H  | -2.42396636 | 2.84384977  | 2.96334616  |
| H  | -2.15761031 | 1.36420331  | -3.63760836 |
| Cs | 0.20465800  | 0.10074000  | 0.48149700  |

289

n = 8, Energy = -815.67713042

|   |             |            |             |
|---|-------------|------------|-------------|
| C | -3.81354881 | 4.21703231 | -5.06149887 |
| C | -3.12845465 | 3.90269235 | -2.32335427 |
| C | -3.79033356 | 2.92195635 | -4.47957157 |
| C | -3.49421698 | 5.35493829 | -4.27435388 |
| C | -3.44778648 | 2.76478637 | -3.11049926 |
| C | -3.15166990 | 5.19776831 | -2.90528158 |

|   |             |             |             |
|---|-------------|-------------|-------------|
| C | -4.15609590 | 4.37420229  | -6.43057118 |
| C | -4.10966539 | 1.78405038  | -5.26671656 |
| C | -3.51743223 | 6.65001425  | -4.85628119 |
| C | -2.78590756 | 3.74552237  | -0.95428197 |
| C | -3.42457123 | 1.46971041  | -2.52857196 |
| C | -2.83233806 | 6.33567428  | -2.11813658 |
| C | -4.45221248 | 1.94122036  | -6.63578887 |
| C | -3.85997931 | 6.80718423  | -6.22535349 |
| C | -3.08202414 | 1.31254043  | -1.15949965 |
| C | -2.48979098 | 6.17850430  | -0.74906428 |
| C | -4.47542774 | 3.23629632  | -7.21771623 |
| C | -4.17931116 | 5.66927826  | -7.01249854 |
| C | -2.76269230 | 2.45044640  | -0.37235460 |
| C | -2.46657572 | 4.88342834  | -0.16713691 |
| C | -4.08645011 | 0.48897465  | -4.68478924 |
| C | -3.19810043 | 7.78791999  | -4.06913621 |
| C | -3.74390303 | 0.33180467  | -3.31571693 |
| C | -2.85555334 | 7.63075001  | -2.70006391 |
| H | -4.73836880 | 3.35694088  | -8.26862379 |
| H | -4.44225222 | 5.78992282  | -8.06340610 |
| H | -2.49975124 | 2.32980185  | 0.67855296  |
| H | -2.20363466 | 4.76278378  | 0.88377065  |
| H | -4.33157105 | -0.38448848 | -5.28900621 |
| H | -3.72608288 | -0.66230303 | -2.86902623 |
| H | -3.21592058 | 8.78202769  | -4.51582691 |
| H | -2.61043241 | 8.50421314  | -2.09584693 |
| H | -4.69733340 | 1.06775747  | -7.24000588 |



|   |             |             |             |
|---|-------------|-------------|-------------|
| H | -3.06420395 | 0.31843296  | -0.71280887 |
| H | -3.87779951 | 7.80129170  | -6.67204427 |
| H | -2.24467006 | 7.05196719  | -0.14484727 |
| C | 3.95497676  | 3.35350562  | -1.11637928 |
| C | 3.04796677  | 0.72219851  | -1.68131757 |
| C | 4.78815945  | 2.23912962  | -0.83287827 |
| C | 2.66828907  | 3.15222806  | -1.68234944 |
| C | 4.33465445  | 0.92347607  | -1.11534741 |
| C | 2.21478408  | 1.83657450  | -1.96481859 |
| C | 4.40848175  | 4.66915917  | -0.83391013 |
| C | 6.07484713  | 2.44040718  | -0.26690810 |
| C | 1.83510638  | 4.26660405  | -1.96585046 |
| C | 2.59446177  | -0.59345505 | -1.96378672 |
| C | 5.16783714  | -0.19089993 | -0.83184640 |
| C | 0.92809639  | 1.63529694  | -2.53078875 |
| C | 6.52835213  | 3.75606074  | 0.01556104  |
| C | 2.28861138  | 5.58225761  | -1.68338131 |
| C | 4.71433214  | -1.50655348 | -1.11431555 |
| C | 0.47459140  | 0.31964339  | -2.81325790 |
| C | 5.69516946  | 4.87043679  | -0.26793996 |
| C | 3.57529908  | 5.78353522  | -1.11741113 |
| C | 3.42764444  | -1.70783110 | -1.68028572 |
| C | 1.30777407  | -0.79473266 | -2.52975690 |
| C | 6.90802961  | 1.32603128  | 0.01659283  |
| C | 0.54841891  | 4.06532640  | -2.53182053 |
| C | 6.45452462  | 0.01037772  | -0.26587632 |
| C | 0.09491391  | 2.74967285  | -2.81428968 |

|   |             |             |             |
|---|-------------|-------------|-------------|
| H | 6.04328243  | 5.88033982  | -0.05111506 |
| H | 3.92341206  | 6.79343826  | -0.90058624 |
| H | 3.07953147  | -2.71773413 | -1.89711062 |
| H | 0.95966110  | -1.80463570 | -2.74658179 |
| H | 7.89569842  | 1.48053306  | 0.45103475  |
| H | 7.09408042  | -0.84502364 | -0.04825932 |
| H | -0.09113689 | 4.92072776  | -2.74943754 |
| H | -0.89275490 | 2.59517106  | -3.24873161 |
| H | 7.51602075  | 3.91056267  | 0.45000290  |
| H | 5.35388772  | -2.36195481 | -0.89669864 |
| H | 1.64905581  | 6.43765893  | -1.90099822 |
| H | -0.51307722 | 0.16514146  | -3.24769975 |
| C | -1.41525780 | -3.49599982 | -1.03020566 |
| C | 1.16711668  | -4.08515158 | -0.00558781 |
| C | -1.06437463 | -3.09267017 | 0.28531943  |
| C | -0.47495373 | -4.19390535 | -1.83342183 |
| C | 0.22681261  | -3.38724605 | 0.79762836  |
| C | 0.81623351  | -4.48848123 | -1.32111290 |
| C | -2.70644504 | -3.20142395 | -1.54251459 |
| C | -2.00467870 | -2.39476464 | 1.08853559  |
| C | -0.82583691 | -4.59723500 | -3.14894692 |
| C | 2.45830392  | -4.37972746 | 0.50672112  |
| C | 0.57769578  | -2.98391640 | 2.11315345  |
| C | 1.75653758  | -5.18638676 | -2.12432907 |
| C | -3.29586594 | -2.10018877 | 0.57622666  |
| C | -2.11702415 | -4.30265912 | -3.66125585 |
| C | 1.86888302  | -3.27849228 | 2.62546238  |

|   |             |             |             |
|---|-------------|-------------|-------------|
| C | 3.04772482  | -5.48096264 | -1.61202014 |
| C | -3.64674917 | -2.50351840 | -0.73929845 |
| C | -3.05732827 | -3.60475358 | -2.85803971 |
| C | 2.80918715  | -3.97639782 | 1.82224623  |
| C | 3.39860804  | -5.07763300 | -0.29649502 |
| C | -1.65379547 | -1.99143510 | 2.40406048  |
| C | 0.11446710  | -5.29514043 | -3.95216288 |
| C | -0.36260823 | -2.28601098 | 2.91636941  |
| C | 1.40565435  | -5.58971631 | -3.43985395 |
| H | -4.63787172 | -2.27740031 | -1.13254965 |
| H | -4.04845082 | -3.37863549 | -3.25129091 |
| H | 3.80030970  | -4.20251592 | 2.21549743  |
| H | 4.38973060  | -5.30375110 | 0.09675618  |
| H | -2.37557822 | -1.45571884 | 3.02061380  |
| H | -0.09326832 | -1.97641283 | 3.92617397  |
| H | -0.15487280 | -5.60473857 | -4.96196745 |
| H | 2.12743710  | -6.12543257 | -4.05640728 |
| H | -4.01764869 | -1.56447259 | 1.19277976  |
| H | 2.13822304  | -2.96889425 | 3.63526676  |
| H | -2.38636417 | -4.61225715 | -4.67106023 |
| H | 3.76950757  | -6.01667881 | -2.22857323 |
| C | -4.19733733 | -5.11211857 | 2.06896175  |
| C | -1.54578467 | -5.89854722 | 2.71425084  |
| C | -3.63720826 | -4.75724231 | 3.32463621  |
| C | -3.43169006 | -5.86020916 | 1.13593184  |
| C | -2.31143193 | -5.15045664 | 3.64728076  |
| C | -2.10591374 | -6.25342349 | 1.45857638  |

|   |             |             |             |
|---|-------------|-------------|-------------|
| C | -5.52311365 | -4.71890425 | 1.74631720  |
| C | -4.40285552 | -4.00915172 | 4.25766612  |
| C | -3.99181913 | -6.21508543 | -0.11974262 |
| C | -0.22000834 | -6.29176155 | 3.03689539  |
| C | -1.75130287 | -4.79558037 | 4.90295521  |
| C | -1.34026647 | -7.00151408 | 0.52554647  |
| C | -5.72863185 | -3.61593740 | 3.93502157  |
| C | -5.31759545 | -5.82187110 | -0.44238717 |
| C | -0.42552654 | -5.18879470 | 5.22559976  |
| C | -0.01449015 | -7.39472840 | 0.84819102  |
| C | -6.28876097 | -3.97081364 | 2.67934710  |
| C | -6.08324277 | -5.07378050 | 0.49064273  |
| C | 0.34012077  | -5.93688530 | 4.29256986  |
| C | 0.54563897  | -7.03985215 | 2.10386549  |
| C | -3.84272644 | -3.65427557 | 5.51334037  |
| C | -3.22617188 | -6.96317591 | -1.05277232 |
| C | -2.51695011 | -4.04748989 | 5.83598491  |
| C | -1.90039556 | -7.35639023 | -0.73012777 |
| H | -7.30643430 | -3.66898013 | 2.43168334  |
| H | -7.10091610 | -4.77194698 | 0.24297897  |
| H | 1.35779410  | -6.23871882 | 4.54023362  |
| H | 1.56331230  | -7.34168567 | 2.35152925  |
| H | -4.43044163 | -3.08003696 | 6.22953946  |
| H | -2.08699187 | -3.77508484 | 6.79984780  |
| H | -3.65613013 | -7.23558096 | -2.01663520 |
| H | -1.31268037 | -7.93062883 | -1.44632687 |
| H | -6.31634708 | -3.04169889 | 4.65122044  |

|   |             |             |             |
|---|-------------|-------------|-------------|
| H | 0.00443178  | -4.91638977 | 6.18946244  |
| H | -5.74755378 | -6.09427603 | -1.40624985 |
| H | 0.57322508  | -7.96896691 | 0.13199215  |
| C | -6.90262752 | 2.80998890  | -2.08327868 |
| C | -6.21923309 | 2.67967161  | 0.67018986  |
| C | -6.89657293 | 1.55886053  | -1.41168264 |
| C | -6.56698488 | 3.99595861  | -1.37814045 |
| C | -6.55487572 | 1.49370189  | -0.03494838 |
| C | -6.22528767 | 3.93079997  | -0.00140618 |
| C | -7.24432473 | 2.87514754  | -3.46001295 |
| C | -7.23221557 | 0.37289081  | -2.11682087 |
| C | -6.57303947 | 5.24708698  | -2.04973648 |
| C | -5.87753588 | 2.61451296  | 2.04692412  |
| C | -6.54882114 | 0.24257352  | 0.63664766  |
| C | -5.88964504 | 5.11676969  | 0.70373205  |
| C | -7.57391278 | 0.43804946  | -3.49355514 |
| C | -6.91473668 | 5.31224562  | -3.42647075 |
| C | -6.20712393 | 0.17741488  | 2.01338193  |
| C | -5.54794783 | 5.05161104  | 2.08046632  |
| C | -7.57996737 | 1.68917782  | -4.16515124 |
| C | -7.25037932 | 4.12627591  | -4.13160904 |
| C | -5.87148128 | 1.36338460  | 2.71852022  |
| C | -5.54189323 | 3.80048268  | 2.75206241  |
| C | -7.22616095 | -0.87823731 | -1.44522484 |
| C | -6.23739687 | 6.43305646  | -1.34459826 |
| C | -6.88446374 | -0.94339596 | -0.06849057 |
| C | -5.89569965 | 6.36789782  | 0.03213601  |

|   |             |             |             |
|---|-------------|-------------|-------------|
| H | -7.84225607 | 1.73919396  | -5.22194017 |
| H | -7.51266802 | 4.17629205  | -5.18839797 |
| H | -5.60919259 | 1.31336846  | 3.77530915  |
| H | -5.27960454 | 3.75046654  | 3.80885134  |
| H | -7.48380215 | -1.78859445 | -1.98649295 |
| H | -6.87981621 | -1.90376924 | 0.44703036  |
| H | -6.24204439 | 7.39342974  | -1.86011919 |
| H | -5.63805846 | 7.27825495  | 0.57340412  |
| H | -7.83155396 | -0.47230743 | -4.03482331 |
| H | -6.20247636 | -0.78295816 | 2.52890292  |
| H | -6.91938425 | 6.27261867  | -3.94199174 |
| H | -5.29030665 | 5.96196794  | 2.62173449  |
| C | 0.07053585  | 5.69605394  | 4.31862770  |
| C | 1.39575352  | 3.93046689  | 6.10527260  |
| C | -0.63762781 | 5.12667453  | 5.40982493  |
| C | 1.44130835  | 5.38263983  | 4.12075292  |
| C | 0.02498103  | 4.24388100  | 6.30314738  |
| C | 2.10391718  | 4.49984630  | 5.01407537  |
| C | -0.59207299 | 6.57884747  | 3.42530526  |
| C | -2.00840031 | 5.44008864  | 5.60769971  |
| C | 2.14947201  | 5.95201924  | 3.02955569  |
| C | 2.05836236  | 3.04767336  | 6.99859504  |
| C | -0.68318263 | 3.67450159  | 7.39434460  |
| C | 3.47468968  | 4.18643219  | 4.81620059  |
| C | -2.67100915 | 6.32288217  | 4.71437727  |
| C | 1.48686317  | 6.83481277  | 2.13623325  |
| C | -0.02057380 | 2.79170806  | 8.28766705  |

|   |             |             |            |
|---|-------------|-------------|------------|
| C | 4.13729852  | 3.30363866  | 5.70952303 |
| C | -1.96284551 | 6.89226162  | 3.62318000 |
| C | 0.11609065  | 7.14822692  | 2.33410799 |
| C | 1.35019873  | 2.47829391  | 8.08979231 |
| C | 3.42913489  | 2.73425921  | 6.80072030 |
| C | -2.71656377 | 4.87070925  | 6.69889681 |
| C | 3.52024430  | 5.63860510  | 2.83168104 |
| C | -2.05395493 | 3.98791573  | 7.59221926 |
| C | 4.18285314  | 4.75581157  | 3.72500348 |
| H | -2.47146776 | 7.56989887  | 2.93746069 |
| H | -0.39253161 | 7.82586417  | 1.64838868 |
| H | 1.85882098  | 1.80065665  | 8.77551162 |
| H | 3.93775714  | 2.05662195  | 7.48643961 |
| H | -3.76877656 | 5.11128770  | 6.85078664 |
| H | -2.59754541 | 3.55085685  | 8.42982847 |
| H | 4.06383479  | 6.07566398  | 1.99407183 |
| H | 5.23506593  | 4.51523312  | 3.57311366 |
| H | -3.72322176 | 6.56346068  | 4.86626693 |
| H | -0.56416405 | 2.35464917  | 9.12527617 |
| H | 2.03045342  | 7.27187166  | 1.29862412 |
| H | 5.18951113  | 3.06306014  | 5.55763337 |
| C | 1.67191156  | 0.95179404  | 3.83301836 |
| C | 0.27624939  | -0.35700624 | 5.93177238 |
| C | 2.33528646  | -0.01844041 | 4.62987401 |
| C | 0.31070558  | 1.26762835  | 4.08553971 |
| C | 1.63745537  | -0.67284055 | 5.67925102 |
| C | -0.38712551 | 0.61322821  | 5.13491672 |

|   |             |             |            |
|---|-------------|-------------|------------|
| C | 2.36974265  | 1.60619418  | 2.78364135 |
| C | 3.69649244  | -0.33427472 | 4.37735266 |
| C | -0.35266931 | 2.23786281  | 3.28868406 |
| C | -0.42158170 | -1.01140638 | 6.98114938 |
| C | 2.30083026  | -1.64307500 | 6.47610668 |
| C | -1.74833149 | 0.92906253  | 5.38743808 |
| C | 4.39432353  | 0.32012542  | 3.32797565 |
| C | 0.34516178  | 2.89226295  | 2.23930705 |
| C | 1.60299918  | -2.29747514 | 7.52548368 |
| C | -2.44616258 | 0.27466239  | 6.43681508 |
| C | 3.73094867  | 1.29035990  | 2.53111995 |
| C | 1.70636779  | 2.57642866  | 1.98678565 |
| C | 0.24179316  | -1.98164086 | 7.77800508 |
| C | -1.78278772 | -0.69557209 | 7.23367078 |
| C | 4.35986714  | -1.30450905 | 5.17420826 |
| C | -1.71387510 | 2.55369699  | 3.54120547 |
| C | 3.66203605  | -1.95890919 | 6.22358527 |
| C | -2.41170619 | 1.89929685  | 4.59058247 |
| H | 4.26660772  | 1.79268111  | 1.72561229 |
| H | 2.24202684  | 3.07874987  | 1.18127799 |
| H | -0.29386589 | -2.48396207 | 8.58351275 |
| H | -2.31844676 | -1.19789330 | 8.03917845 |
| H | 5.40473662  | -1.54694528 | 4.98037144 |
| H | 4.17124642  | -2.70366669 | 6.83525620 |
| H | -2.22308547 | 3.29845449  | 2.92953453 |
| H | -3.45657567 | 2.14173309  | 4.78441929 |
| H | 5.43919284  | 0.07768934  | 3.13413873 |



|   |             |             |             |
|---|-------------|-------------|-------------|
| H | 2.11220932  | -3.04223254 | 8.13715461  |
| H | -0.16404837 | 3.63702035  | 1.62763612  |
| H | -3.49103189 | 0.51709847  | 6.63065200  |
| C | 1.93556103  | 0.11348892  | -5.82341259 |
| C | 3.45774240  | 2.43890737  | -5.23946704 |
| C | 1.35890761  | 1.40022493  | -5.99128560 |
| C | 3.27330513  | -0.01053787 | -5.36356680 |
| C | 2.11999829  | 2.56293416  | -5.69931283 |
| C | 4.03439582  | 1.15217136  | -5.07159403 |
| C | 1.17447035  | -1.04922031 | -6.11538537 |
| C | 0.02116351  | 1.52425171  | -6.45113139 |
| C | 3.84995855  | -1.29727388 | -5.19569379 |
| C | 4.21883308  | 3.60161660  | -4.94749426 |
| C | 1.54334487  | 3.84967017  | -5.86718584 |
| C | 5.37213992  | 1.02814458  | -4.61174824 |
| C | -0.73992718 | 0.36154248  | -6.74310416 |
| C | 3.08886787  | -2.45998310 | -5.48766657 |
| C | 2.30443556  | 5.01237939  | -5.57521306 |
| C | 6.13323060  | 2.19085381  | -4.31977546 |
| C | -0.16327379 | -0.92519358 | -6.57523117 |
| C | 1.75112373  | -2.33595637 | -5.94751237 |
| C | 3.64217969  | 4.88835266  | -5.11536726 |
| C | 5.55657721  | 3.47758987  | -4.48764846 |
| C | -0.55548973 | 2.81098759  | -6.61900434 |
| C | 5.18770247  | -1.42130052 | -4.73584806 |
| C | 0.20560096  | 3.97369681  | -6.32703156 |
| C | 5.94879315  | -0.25859130 | -4.44387529 |

|    |             |             |             |
|----|-------------|-------------|-------------|
| H  | -0.74749126 | -1.81769569 | -6.79935110 |
| H  | 1.16690627  | -3.22845848 | -6.17163230 |
| H  | 4.22639716  | 5.78085477  | -4.89124733 |
| H  | 6.14079468  | 4.37009198  | -4.26352853 |
| H  | -1.58234973 | 2.90619127  | -6.97198459 |
| H  | -0.23704152 | 4.96140271  | -6.45589185 |
| H  | 5.63034494  | -2.40900642 | -4.60698778 |
| H  | 6.97565316  | -0.35379498 | -4.09089504 |
| H  | -1.76678703 | 0.45674598  | -7.09608436 |
| H  | 1.86179330  | 6.00008520  | -5.70407328 |
| H  | 3.53151012  | -3.44768891 | -5.35880635 |
| H  | 7.16009045  | 2.09565031  | -3.96679526 |
| Cs | 0.20465800  | 0.10074000  | 0.48149700  |

325

n = 9, Energy = -903.83836954

|   |             |             |             |
|---|-------------|-------------|-------------|
| C | -5.97203620 | -1.84553494 | -0.40860801 |
| C | -5.41992728 | -1.77296423 | -3.19347941 |
| C | -5.51631563 | -3.01497161 | -1.07278924 |
| C | -6.15170231 | -0.63981291 | -1.13686248 |
| C | -5.24026117 | -2.97868625 | -2.46522495 |
| C | -5.87564785 | -0.60352756 | -2.52929818 |
| C | -6.24809066 | -1.88182029 | 0.98382769  |
| C | -5.33664953 | -4.22069363 | -0.34453478 |
| C | -6.60742287 | 0.52962376  | -0.47268124 |
| C | -5.14387282 | -1.73667888 | -4.58591512 |
| C | -4.78454061 | -4.14812293 | -3.12940618 |
| C | -6.05531396 | 0.60219446  | -3.25755265 |

|   |             |             |             |
|---|-------------|-------------|-------------|
| C | -5.61270399 | -4.25697898 | 1.04790092  |
| C | -6.88347733 | 0.49333840  | 0.91975446  |
| C | -4.50848615 | -4.11183757 | -4.52184189 |
| C | -5.77925950 | 0.63847982  | -4.64998835 |
| C | -6.06842456 | -3.08754231 | 1.71208222  |
| C | -6.70381124 | -0.71238362 | 1.64800899  |
| C | -4.68815224 | -2.90611555 | -5.25009641 |
| C | -5.32353892 | -0.53095685 | -5.31416964 |
| C | -4.88092902 | -5.39013007 | -1.00871602 |
| C | -6.78708892 | 1.73534555  | -1.20093570 |
| C | -4.60487456 | -5.35384472 | -2.40115172 |
| C | -6.51103446 | 1.77163090  | -2.59337140 |
| H | -6.28032551 | -3.11539515 | 2.78092366  |
| H | -6.91571219 | -0.74023646 | 2.71685043  |
| H | -4.47625130 | -2.87826271 | -6.31893785 |
| H | -5.11163797 | -0.50310401 | -6.38301108 |
| H | -4.74301629 | -6.31564918 | -0.44970375 |
| H | -4.25506086 | -6.25151099 | -2.91098101 |
| H | -7.13690263 | 2.63301182  | -0.69110641 |
| H | -6.64894720 | 2.69715001  | -3.15238367 |
| H | -5.47479132 | -5.18249787 | 1.60691324  |
| H | -4.15867249 | -5.00950361 | -5.03167124 |
| H | -7.23329099 | 1.39100444  | 1.42958382  |
| H | -5.91717216 | 1.56399870  | -5.20900067 |
| C | 0.21013503  | 2.40056674  | 6.91216080  |
| C | 2.87334725  | 1.47474041  | 6.57194643  |
| C | 1.16640427  | 3.21622672  | 6.25136734  |

|   |             |             |            |
|---|-------------|-------------|------------|
| C | 0.58547189  | 1.12199359  | 7.40284707 |
| C | 2.49801038  | 2.75331356  | 6.08126015 |
| C | 1.91707800  | 0.65908043  | 7.23273989 |
| C | -1.12147108 | 2.86347990  | 7.08226798 |
| C | 0.79106741  | 4.49479987  | 5.76068107 |
| C | -0.37079735 | 0.30633360  | 8.06364053 |
| C | 4.20495336  | 1.01182725  | 6.40183924 |
| C | 3.45427963  | 3.56897355  | 5.42046670 |
| C | 2.29241487  | -0.61949272 | 7.72342616 |
| C | -0.54053870 | 4.95771303  | 5.93078825 |
| C | -1.70240346 | 0.76924676  | 8.23374772 |
| C | 4.78588574  | 3.10606039  | 5.25035951 |
| C | 3.62402097  | -1.08240588 | 7.55331898 |
| C | -1.49680800 | 4.14205307  | 6.59158172 |
| C | -2.07774038 | 2.04781993  | 7.74306145 |
| C | 5.16122266  | 1.82748722  | 5.74104578 |
| C | 4.58029028  | -0.26674592 | 6.89252551 |
| C | 1.74733660  | 5.31045965  | 5.09988772 |
| C | 0.00453957  | -0.97223934 | 8.55432669 |
| C | 3.07894271  | 4.84754649  | 4.92978053 |
| C | 1.33614568  | -1.43515251 | 8.38421951 |
| H | -2.51895630 | 4.49738780  | 6.72215694 |
| H | -3.09988868 | 2.40315466  | 7.87363668 |
| H | 6.18337096  | 1.47215248  | 5.61047055 |
| H | 5.60243858  | -0.62208065 | 6.76195028 |
| H | 1.45922590  | 6.29189970  | 4.72323413 |
| H | 3.81298042  | 5.47365176  | 4.42255170 |

|   |             |             |             |
|---|-------------|-------------|-------------|
| H | -0.72949814 | -1.59834461 | 9.06155552  |
| H | 1.62425638  | -2.41659255 | 8.76087310  |
| H | -0.82864951 | 5.93915289  | 5.55413478  |
| H | 5.51992345  | 3.73216543  | 4.74313079  |
| H | -2.43644117 | 0.14314171  | 8.74097644  |
| H | 3.91213179  | -2.06384574 | 7.92997245  |
| C | -1.76858390 | 0.07905248  | -4.33927279 |
| C | -2.64863168 | 0.63694947  | -1.69732912 |
| C | -2.17611430 | 1.39354586  | -3.98937821 |
| C | -1.80107739 | -0.95649240 | -3.36819553 |
| C | -2.61613819 | 1.67249436  | -2.66840638 |
| C | -2.24110128 | -0.67754390 | -2.04722369 |
| C | -1.32856001 | -0.19989601 | -5.66024462 |
| C | -2.14362080 | 2.42909074  | -4.96045548 |
| C | -1.39354700 | -2.27098578 | -3.71809010 |
| C | -3.08865557 | 0.91589797  | -0.37635728 |
| C | -3.02366858 | 2.98698773  | -2.31851180 |
| C | -2.27359477 | -1.71308878 | -1.07614643 |
| C | -1.70359692 | 2.15014224  | -6.28142731 |
| C | -0.95352311 | -2.54993427 | -5.03906194 |
| C | -3.46369247 | 3.26593623  | -0.99753997 |
| C | -2.71361866 | -1.43414029 | 0.24482541  |
| C | -1.29606650 | 0.83564886  | -6.63132194 |
| C | -0.92102960 | -1.51438940 | -6.01013925 |
| C | -3.49618598 | 2.23039136  | -0.02646265 |
| C | -3.12114908 | -0.11964690 | 0.59472004  |
| C | -2.55115117 | 3.74358389  | -4.61056084 |

|   |             |             |             |
|---|-------------|-------------|-------------|
| C | -1.42604052 | -3.30653043 | -2.74701290 |
| C | -2.99117505 | 4.02253239  | -3.28958901 |
| C | -1.86606441 | -3.02758193 | -1.42604106 |
| H | -0.95830170 | 0.62152643  | -7.64530732 |
| H | -0.58326480 | -1.72851183 | -7.02412463 |
| H | -3.83395078 | 2.44451379  | 0.98752272  |
| H | -3.45891388 | 0.09447553  | 1.60870541  |
| H | -2.52620898 | 4.53847406  | -5.35596527 |
| H | -3.30399771 | 5.03154501  | -3.02100795 |
| H | -1.11321787 | -4.31554305 | -3.01559395 |
| H | -1.89100660 | -3.82247210 | -0.68063663 |
| H | -1.67865468 | 2.94503217  | -7.02683174 |
| H | -3.77651511 | 4.27494863  | -0.72895880 |
| H | -0.64070047 | -3.55894668 | -5.30764311 |
| H | -2.73856090 | -2.22903022 | 0.99022983  |
| C | 5.38584070  | -5.69256692 | 6.99427867  |
| C | 5.16127095  | -7.70369600 | 5.00166035  |
| C | 6.27018574  | -5.69315703 | 5.88327301  |
| C | 4.38921079  | -6.69754135 | 7.10897517  |
| C | 6.15790087  | -6.69872158 | 4.88696385  |
| C | 4.27692591  | -7.70310589 | 6.11266601  |
| C | 5.49812558  | -4.68700238 | 7.99058783  |
| C | 7.26681566  | -4.68818261 | 5.76857650  |
| C | 3.50486575  | -6.69695124 | 8.21998083  |
| C | 5.04898608  | -8.70926054 | 4.00535119  |
| C | 7.04224591  | -6.69931169 | 3.77595819  |
| C | 3.28029600  | -8.70808032 | 6.22736251  |

|   |            |              |             |
|---|------------|--------------|-------------|
| C | 7.37910053 | -3.68261807  | 6.76488566  |
| C | 3.61715062 | -5.69138670  | 9.21628999  |
| C | 6.92996103 | -7.70487623  | 2.77964903  |
| C | 3.16801112 | -9.71364486  | 5.23105335  |
| C | 6.49475550 | -3.68202791  | 7.87589137  |
| C | 4.61378054 | -4.68641223  | 9.10159353  |
| C | 5.93333111 | -8.70985070  | 2.89434549  |
| C | 4.05235616 | -9.71423501  | 4.12004765  |
| C | 8.15116052 | -4.68877282  | 4.65757096  |
| C | 2.50823601 | -7.70192557  | 8.33467721  |
| C | 8.03887564 | -5.69433736  | 3.66126180  |
| C | 2.39595114 | -8.70749011  | 7.33836805  |
| H | 6.58094600 | -2.91015094  | 8.64066385  |
| H | 4.69997104 | -3.91453526  | 9.86636601  |
| H | 5.84714061 | -9.48172767  | 2.12957300  |
| H | 3.96616566 | -10.48611198 | 3.35527516  |
| H | 8.91617933 | -3.91734872  | 4.56952926  |
| H | 8.71770395 | -5.69479031  | 2.80844753  |
| H | 1.82940771 | -7.70147261  | 9.18749149  |
| H | 1.63093233 | -9.47891420  | 7.42640976  |
| H | 8.14411917 | -2.91119403  | 6.67684412  |
| H | 7.60878915 | -7.70532933  | 1.92683483  |
| H | 2.93832250 | -5.69093360  | 10.06910419 |
| H | 2.40299249 | -10.48506890 | 5.31909490  |
| C | 3.49531684 | -6.55530167  | 1.41538199  |
| C | 1.81690890 | -6.40162745  | 3.70119268  |
| C | 2.46669264 | -7.51535464  | 1.60677327  |

|   |             |              |             |
|---|-------------|--------------|-------------|
| C | 3.68473707  | -5.51841159  | 2.36689605  |
| C | 1.62748867  | -7.43851753  | 2.74967862  |
| C | 2.84553310  | -5.44157448  | 3.50980140  |
| C | 4.33452082  | -6.63213879  | 0.27247665  |
| C | 2.27727241  | -8.55224472  | 0.65525921  |
| C | 4.71336128  | -4.55835862  | 2.17550477  |
| C | 0.97770492  | -6.32479034  | 4.84409802  |
| C | 0.59886446  | -8.39857050  | 2.94106990  |
| C | 3.03495333  | -4.40468440  | 4.46131546  |
| C | 3.11647638  | -8.62908183  | -0.48764614 |
| C | 5.55256525  | -4.63519574  | 1.03259943  |
| C | -0.24033951 | -8.32173338  | 4.08397524  |
| C | 2.19574936  | -4.32784729  | 5.60422081  |
| C | 4.14510062  | -7.66902887  | -0.67903747 |
| C | 5.36314506  | -5.67208582  | 0.08108532  |
| C | -0.05091932 | -7.28484330  | 5.03548935  |
| C | 1.16712512  | -5.28790025  | 5.79561214  |
| C | 1.24864832  | -9.51229750  | 0.84665056  |
| C | 4.90278139  | -3.52146874  | 3.12701876  |
| C | 0.40944435  | -9.43546038  | 1.98955591  |
| C | 4.06357741  | -3.44463162  | 4.26992411  |
| H | 4.78927829  | -7.72800947  | -1.55633801 |
| H | 6.00732272  | -5.73106642  | -0.79621522 |
| H | -0.69509698 | -7.22586270  | 5.91278989  |
| H | 0.52294745  | -5.22891965  | 6.67291267  |
| H | 1.10324826  | -10.30822024 | 0.11626295  |
| H | -0.38013345 | -10.17240253 | 2.13646893  |



|   |             |             |             |
|---|-------------|-------------|-------------|
| H | 5.69235919  | -2.78452659 | 2.98010574  |
| H | 4.20897748  | -2.64870888 | 5.00031172  |
| H | 2.97107647  | -9.42500439 | -1.21803372 |
| H | -1.02991723 | -9.05867533 | 4.23088838  |
| H | 6.34214297  | -3.89825379 | 0.88568628  |
| H | 2.34114927  | -3.53192473 | 6.33460839  |
| C | 3.92253793  | 4.09109674  | 0.05696398  |
| C | 3.63151503  | 1.34404798  | -0.60229947 |
| C | 4.78573059  | 3.12579415  | 0.63962118  |
| C | 2.91383382  | 3.68287496  | -0.85532493 |
| C | 4.64021914  | 1.75226977  | 0.30998945  |
| C | 2.76832237  | 2.30935058  | -1.18495666 |
| C | 4.06804938  | 5.46462112  | 0.38659571  |
| C | 5.79443470  | 3.53401593  | 1.55191009  |
| C | 2.05064116  | 4.64817756  | -1.43798213 |
| C | 3.48600358  | -0.02947640 | -0.93193120 |
| C | 5.50341180  | 0.78696717  | 0.89264664  |
| C | 1.75961826  | 1.90112880  | -2.09724558 |
| C | 5.93994615  | 4.90754031  | 1.88154182  |
| C | 2.19615261  | 6.02170194  | -1.10835040 |
| C | 5.35790035  | -0.58655721 | 0.56301491  |
| C | 1.61410681  | 0.52760442  | -2.42687731 |
| C | 5.07675349  | 5.87284296  | 1.29888464  |
| C | 3.20485672  | 6.42992378  | -0.19606147 |
| C | 4.34919623  | -0.99477905 | -0.34927402 |
| C | 2.47729946  | -0.43769824 | -1.84422013 |
| C | 6.65762718  | 2.56871339  | 2.13456714  |

|   |            |             |             |
|---|------------|-------------|-------------|
| C | 1.04193723 | 4.23995572  | -2.35027090 |
| C | 6.51211573 | 1.19518901  | 1.80493541  |
| C | 0.89642578 | 2.86643134  | -2.67990263 |
| H | 5.18844890 | 6.92716796  | 1.55191180  |
| H | 3.31655212 | 7.48424878  | 0.05696569  |
| H | 4.23750083 | -2.04910405 | -0.60230118 |
| H | 2.36560406 | -1.49202324 | -2.09724729 |
| H | 7.43191421 | 2.88206674  | 2.83484532  |
| H | 7.17470735 | 0.45421724  | 2.25218641  |
| H | 0.37934561 | 4.98092749  | -2.79752189 |
| H | 0.12213874 | 2.55307799  | -3.38018081 |
| H | 6.71423301 | 5.22089377  | 2.58181987  |
| H | 6.02049178 | -1.32752898 | 1.01026575  |
| H | 1.53356117 | 6.76267371  | -1.55560123 |
| H | 0.83981995 | 0.21425096  | -3.12715535 |
| C | 6.53115619 | 0.61951533  | -2.82556916 |
| C | 4.38607100 | -0.13628846 | -4.52644236 |
| C | 6.27789411 | -0.75411847 | -3.08128105 |
| C | 5.71187567 | 1.61524724  | -3.42029387 |
| C | 5.20535152 | -1.13202037 | -3.93171765 |
| C | 4.63933308 | 1.23734534  | -4.27073047 |
| C | 7.60369879 | 0.99741723  | -1.97513256 |
| C | 7.09717463 | -1.74985038 | -2.48655634 |
| C | 5.96513775 | 2.98888104  | -3.16458198 |
| C | 3.31352840 | -0.51419035 | -5.37687896 |
| C | 4.95208944 | -2.50565417 | -4.18742954 |
| C | 3.82005256 | 2.23307725  | -4.86545518 |

|   |             |             |             |
|---|-------------|-------------|-------------|
| C | 8.16971723  | -1.37194848 | -1.63611974 |
| C | 7.03768035  | 3.36678294  | -2.31414537 |
| C | 3.87954684  | -2.88355606 | -5.03786615 |
| C | 2.74750996  | 1.85517535  | -5.71589178 |
| C | 8.42297935  | 0.00168534  | -1.38040781 |
| C | 7.85696091  | 2.37105105  | -1.71942063 |
| C | 3.06026628  | -1.88782417 | -5.63259089 |
| C | 2.49424784  | 0.48154154  | -5.97160371 |
| C | 6.84391250  | -3.12348395 | -2.74226827 |
| C | 5.14585729  | 3.98461272  | -3.75930665 |
| C | 5.77136990  | -3.50138584 | -3.59270487 |
| C | 4.07331469  | 3.60671082  | -4.60974325 |
| H | 9.24626905  | 0.29176495  | -0.72760792 |
| H | 8.68025061  | 2.66113066  | -1.06662074 |
| H | 2.23697658  | -2.17790378 | -6.28539078 |
| H | 1.67095814  | 0.19146193  | -6.62440360 |
| H | 7.47279689  | -3.88781345 | -2.28575420 |
| H | 5.57696450  | -4.55579499 | -3.78899076 |
| H | 5.34026269  | 5.03902187  | -3.56302076 |
| H | 3.44443030  | 4.37104033  | -5.06625732 |
| H | 8.79860161  | -2.13627774 | -1.17960567 |
| H | 3.68514134  | -3.93796500 | -5.23415211 |
| H | 7.23208585  | 4.42119187  | -2.11785941 |
| H | 2.11862558  | 2.61950461  | -6.17240585 |
| C | 0.21597461  | -5.60486927 | -0.37535459 |
| C | -1.78584985 | -7.60493890 | -0.13448157 |
| C | 0.10972969  | -6.62497151 | -1.35744598 |

|   |             |              |             |
|---|-------------|--------------|-------------|
| C | -0.67869270 | -5.58480184  | 0.72717331  |
| C | -0.89118254 | -7.62500633  | -1.23700947 |
| C | -1.67960494 | -6.58483665  | 0.84760982  |
| C | 1.21688684  | -4.60483445  | -0.49579110 |
| C | 1.00439701  | -6.64503895  | -2.45997388 |
| C | -0.57244779 | -4.56469959  | 1.70926470  |
| C | -2.78676209 | -8.60497371  | -0.01404507 |
| C | -0.99742746 | -8.64510857  | -2.21910087 |
| C | -2.57427225 | -6.56476922  | 1.95013772  |
| C | 2.00530924  | -5.64500413  | -2.58041039 |
| C | 0.42846445  | -3.56466478  | 1.58882819  |
| C | -1.99833969 | -9.64514339  | -2.09866436 |
| C | -3.57518448 | -7.56480403  | 2.07057423  |
| C | 2.11155420  | -4.62490185  | -1.59831901 |
| C | 1.32313180  | -3.58473217  | 0.48630029  |
| C | -2.89300705 | -9.62507600  | -0.99613645 |
| C | -3.68142944 | -8.58490632  | 1.08848284  |
| C | 0.89815201  | -7.66514109  | -3.44206507 |
| C | -1.46711502 | -4.54463226  | 2.81179240  |
| C | -0.10276022 | -8.66517591  | -3.32162856 |
| C | -2.46802726 | -5.54466707  | 2.93222891  |
| H | 2.87986003  | -3.85726953  | -1.69076674 |
| H | 2.09143763  | -2.81709985  | 0.39385255  |
| H | -3.66131288 | -10.39270832 | -0.90368871 |
| H | -4.44973527 | -9.35253864  | 1.18093058  |
| H | 1.58490374  | -7.68054498  | -4.28837178 |
| H | -0.18431441 | -9.44821220  | -4.07548753 |

|   |             |              |             |
|---|-------------|--------------|-------------|
| H | -1.38556083 | -3.76159596  | 3.56565136  |
| H | -3.15477898 | -5.52926318  | 3.77853562  |
| H | 2.69206093  | -5.66040788  | -3.42671691 |
| H | -2.07989400 | -10.42817962 | -2.85252311 |
| H | 0.51001875  | -2.78162854  | 2.34268695  |
| H | -4.26193617 | -7.54940028  | 2.91688074  |
| C | -2.80650746 | 0.94356394   | 4.31180312  |
| C | -0.54437983 | 2.23964580   | 3.18550391  |
| C | -1.54038015 | 0.30079471   | 4.32481934  |
| C | -2.94157096 | 2.23437410   | 3.73563729  |
| C | -0.40931633 | 0.94883564   | 3.76166974  |
| C | -1.81050715 | 2.88241503   | 3.17248769  |
| C | -3.93757128 | 0.29552301   | 4.87495272  |
| C | -1.40531665 | -0.99001545  | 4.90098517  |
| C | -4.20769827 | 2.87714333   | 3.72262107  |
| C | 0.58668398  | 2.88768673   | 2.62235431  |
| C | 0.85681098  | 0.30606641   | 3.77468596  |
| C | -1.94557064 | 4.17322519   | 2.59632186  |
| C | -2.53638046 | -1.63805638  | 5.46413477  |
| C | -5.33876209 | 2.22910239   | 4.28577067  |
| C | 1.98787480  | 0.95410734   | 3.21153636  |
| C | -0.81450683 | 4.82126612   | 2.03317226  |
| C | -3.80250783 | -0.99528718  | 5.45111858  |
| C | -5.20369864 | 0.93829221   | 4.86193653  |
| C | 1.85281134  | 2.24491753   | 2.63537051  |
| C | 0.45162053  | 4.17849692   | 2.04618846  |
| C | -0.13918947 | -1.63278449  | 4.91400134  |

|    |             |             |            |
|----|-------------|-------------|------------|
| C  | -4.34276164 | 4.16795330  | 3.14645530 |
| C  | 0.99187434  | -0.98474356 | 4.35085173 |
| C  | -3.21169782 | 4.81599423  | 2.58330570 |
| H  | -4.67071874 | -1.49272703 | 5.88339536 |
| H  | -6.07190955 | 0.44085236  | 5.29421331 |
| H  | 2.72102226  | 2.74235738  | 2.20309372 |
| H  | 1.31983145  | 4.67593676  | 1.61391167 |
| H  | -0.03551394 | -2.62361773 | 5.35626951 |
| H  | 1.96376088  | -1.47813690 | 4.36084307 |
| H  | -5.31464818 | 4.66134664  | 3.13646397 |
| H  | -3.31537335 | 5.80682747  | 2.14103753 |
| H  | -2.43270512 | -2.62888946 | 5.90640291 |
| H  | 2.95976125  | 0.46071422  | 3.22152762 |
| H  | -6.31064854 | 2.72249552  | 4.27577942 |
| H  | -0.91818218 | 5.81209920  | 1.59090412 |
| Cs | 0.20465800  | 0.10074000  | 0.48149700 |

361

n = 10, Energy = -992.31673498

|   |             |            |            |
|---|-------------|------------|------------|
| C | 0.37739630  | 2.56924527 | 3.11455896 |
| C | -2.09105928 | 2.15310481 | 4.45588431 |
| C | 0.10177190  | 1.31549940 | 3.72164426 |
| C | -0.58120709 | 3.61492091 | 3.17813633 |
| C | -1.13245589 | 1.10742917 | 4.39230694 |
| C | -1.81543488 | 3.40685068 | 3.84879901 |
| C | 1.61162409  | 2.77731550 | 2.44389628 |
| C | 1.06037529  | 0.26982376 | 3.65806689 |
| C | -0.30558269 | 4.86866677 | 2.57105103 |

|   |             |             |            |
|---|-------------|-------------|------------|
| C | -3.32528706 | 1.94503458  | 5.12654699 |
| C | -1.40808029 | -0.14631670 | 4.99939224 |
| C | -2.77403826 | 4.45252631  | 3.91237638 |
| C | 2.29460307  | 0.47789399  | 2.98740421 |
| C | 0.92864510  | 5.07673700  | 1.90038835 |
| C | -2.64230808 | -0.35438693 | 5.67005492 |
| C | -4.00826605 | 4.24445608  | 4.58303906 |
| C | 2.57022752  | 1.73163987  | 2.38031888 |
| C | 1.88724854  | 4.03106137  | 1.83681095 |
| C | -3.60091152 | 0.69128870  | 5.73363232 |
| C | -4.28389050 | 2.99071021  | 5.19012439 |
| C | 0.78475082  | -0.98392188 | 4.26515214 |
| C | -1.26418601 | 5.91434219  | 2.63462845 |
| C | -0.44947697 | -1.19199211 | 4.93581481 |
| C | -2.49841380 | 5.70627196  | 3.30529113 |
| H | 3.51762768  | 1.89135574  | 1.86551445 |
| H | 2.83464869  | 4.19077725  | 1.32200652 |
| H | -4.54831167 | 0.53157283  | 6.24843674 |
| H | -5.23129066 | 2.83099434  | 5.70492881 |
| H | 1.52058023  | -1.78658848 | 4.21634979 |
| H | -0.66104781 | -2.15437460 | 5.40181695 |
| H | -1.05261517 | 6.87672468  | 2.16862632 |
| H | -3.23424321 | 6.50893855  | 3.35409347 |
| H | 3.03043247  | -0.32477237 | 2.93860178 |
| H | -2.85387904 | -1.31676920 | 6.13605703 |
| H | 1.14021606  | 6.03911928  | 1.43438624 |
| H | -4.74409545 | 5.04712245  | 4.63184148 |

|   |             |             |             |
|---|-------------|-------------|-------------|
| C | 2.46432410  | -4.26342383 | 4.23921491  |
| C | 2.71907991  | -3.12575181 | 1.64954285  |
| C | 1.36991393  | -4.30353181 | 3.33530241  |
| C | 3.68611217  | -3.65447985 | 3.84829138  |
| C | 1.49729184  | -3.73469580 | 2.04046638  |
| C | 3.81349008  | -3.08564384 | 2.55345535  |
| C | 2.33694620  | -4.83225984 | 5.53405094  |
| C | 0.14812586  | -4.91247580 | 3.72622594  |
| C | 4.78052234  | -3.61437187 | 4.75220388  |
| C | 2.84645781  | -2.55691580 | 0.35470683  |
| C | 0.40288167  | -3.77480378 | 1.13655388  |
| C | 5.03527815  | -2.47669985 | 2.16253183  |
| C | 0.02074796  | -5.48131181 | 5.02106197  |
| C | 4.65314444  | -4.18320788 | 6.04703991  |
| C | 0.53025957  | -3.20596777 | -0.15828215 |
| C | 5.16265605  | -1.90786384 | 0.86769580  |
| C | 1.11515812  | -5.44120385 | 5.92497452  |
| C | 3.43135636  | -4.79215189 | 6.43796350  |
| C | 1.75204765  | -2.59702376 | -0.54920573 |
| C | 4.06824589  | -1.94797179 | -0.03621676 |
| C | -0.94628408 | -4.95258371 | 2.82231349  |
| C | 6.00231019  | -3.00542795 | 4.36128031  |
| C | -0.81890618 | -4.38374770 | 1.52747746  |
| C | 6.12968809  | -2.43659194 | 3.06644428  |
| H | 1.01738213  | -5.87784556 | 6.91889791  |
| H | 3.33358037  | -5.22879360 | 7.43188688  |
| H | 1.84982364  | -2.16038205 | -1.54312911 |



|   |             |             |             |
|---|-------------|-------------|-------------|
| H | 4.16602188  | -1.51133009 | -1.03014014 |
| H | -1.88413558 | -5.42001258 | 3.12238860  |
| H | -1.65898168 | -4.41453482 | 0.83362908  |
| H | 6.84238569  | -2.97464083 | 5.05512868  |
| H | 7.06753959  | -1.96916306 | 2.76636916  |
| H | -0.91710332 | -5.94874064 | 5.32113718  |
| H | -0.30981570 | -3.23675480 | -0.85213053 |
| H | 5.49321971  | -4.15242085 | 6.74088830  |
| H | 6.10050733  | -1.44043500 | 0.56762058  |
| C | 2.00208733  | 2.01511661  | -4.48632153 |
| C | 1.26512355  | 4.14152520  | -6.21862359 |
| C | 1.67405849  | 3.28776667  | -3.94858649 |
| C | 1.96163429  | 1.80567084  | -5.89020760 |
| C | 1.30557659  | 4.35097096  | -4.81473752 |
| C | 1.59315239  | 2.86887514  | -6.75635863 |
| C | 2.37056923  | 0.95191232  | -3.62017050 |
| C | 1.71451154  | 3.49721244  | -2.54470042 |
| C | 2.28966313  | 0.53302078  | -6.42794264 |
| C | 0.89664165  | 5.20472949  | -7.08477461 |
| C | 0.97754775  | 5.62362102  | -4.27700247 |
| C | 1.55269934  | 2.65942937  | -8.16024470 |
| C | 2.08299343  | 2.43400814  | -1.67854939 |
| C | 2.65814503  | -0.53018351 | -5.56179162 |
| C | 0.60906585  | 6.68682532  | -5.14315350 |
| C | 1.18421745  | 3.72263366  | -9.02639573 |
| C | 2.41102229  | 1.16135804  | -2.21628440 |
| C | 2.69859809  | -0.32073779 | -4.15790551 |

|   |            |             |              |
|---|------------|-------------|--------------|
| C | 0.56861279 | 6.47737959  | -6.54703961  |
| C | 0.85618859 | 4.99528377  | -8.48866072  |
| C | 1.38648272 | 4.76986235  | -2.00696556  |
| C | 2.24921006 | 0.32357516  | -7.83182853  |
| C | 1.01800082 | 5.83306665  | -2.87311659  |
| C | 1.88072816 | 1.38677945  | -8.69797955  |
| H | 2.69387106 | 0.34523647  | -1.55142202  |
| H | 2.98144685 | -1.13685935 | -3.49304313  |
| H | 0.28576402 | 7.29350116  | -7.21190198  |
| H | 0.57333982 | 5.81140533  | -9.15352310  |
| H | 1.41753470 | 4.93063414  | -0.92933461  |
| H | 0.76620401 | 6.80996009  | -2.46034809  |
| H | 2.50100687 | -0.65331828 | -8.24459703  |
| H | 1.84967618 | 1.22600767  | -9.77561051  |
| H | 2.11404546 | 2.59477974  | -0.60091859  |
| H | 0.35726905 | 7.66371866  | -4.73038522  |
| H | 2.90994182 | -1.50707685 | -5.97455990  |
| H | 1.15316542 | 3.56186207  | -10.10402653 |
| C | 7.31867667 | 3.17861767  | 7.47944499   |
| C | 5.50149348 | 5.34176195  | 7.76970615   |
| C | 6.11657926 | 3.00230788  | 8.21448020   |
| C | 7.61218248 | 4.43649960  | 6.88954037   |
| C | 5.20798766 | 4.08388003  | 8.35961077   |
| C | 6.70359089 | 5.51807174  | 7.03467095   |
| C | 8.22726827 | 2.09704552  | 7.33431442   |
| C | 5.82307344 | 1.74442595  | 8.80438482   |
| C | 8.81427990 | 4.61280938  | 6.15450517   |

|   |             |             |             |
|---|-------------|-------------|-------------|
| C | 4.59290188  | 6.42333410  | 7.91483673  |
| C | 4.00589025  | 3.90757024  | 9.09464598  |
| C | 6.99709670  | 6.77595367  | 6.44476633  |
| C | 6.73166504  | 0.66285381  | 8.65925424  |
| C | 9.72287149  | 3.53123724  | 6.00937459  |
| C | 3.09729865  | 4.98914238  | 9.23977656  |
| C | 6.08850511  | 7.85752581  | 6.58989691  |
| C | 7.93376249  | 0.83916355  | 7.92421903  |
| C | 9.42936572  | 2.27335526  | 6.59927921  |
| C | 3.39080443  | 6.24702436  | 8.64987194  |
| C | 4.88640766  | 7.68121607  | 7.32493212  |
| C | 4.62097617  | 1.56811630  | 9.53941989  |
| C | 9.10778557  | 5.87069117  | 5.56460068  |
| C | 3.71238458  | 2.64968845  | 9.68455047  |
| C | 8.19919397  | 6.95226332  | 5.70973126  |
| H | 8.63120248  | 0.00894271  | 7.81281599  |
| H | 10.12680571 | 1.44313443  | 6.48787616  |
| H | 2.69336443  | 7.07724519  | 8.76127498  |
| H | 4.18896766  | 8.51143691  | 7.43633516  |
| H | 4.39567942  | 0.60255897  | 9.99223405  |
| H | 2.78964775  | 2.51435203  | 10.24876769 |
| H | 10.03052239 | 6.00602759  | 5.00038346  |
| H | 8.42449073  | 7.91782065  | 5.25691710  |
| H | 6.50636847  | -0.30270344 | 9.11206826  |
| H | 2.17456193  | 4.85380615  | 9.80399365  |
| H | 10.64560821 | 3.66657347  | 5.44515750  |
| H | 6.31380168  | 8.82308306  | 6.13708288  |

|   |             |             |             |
|---|-------------|-------------|-------------|
| C | -2.84456541 | 0.23711967  | -0.63374158 |
| C | -3.31968932 | -2.54050217 | -0.98683316 |
| C | -3.64209104 | -0.47153000 | 0.30336492  |
| C | -2.28460173 | -0.44304158 | -1.74739387 |
| C | -3.87965299 | -1.86034092 | 0.12681914  |
| C | -2.52216369 | -1.83185251 | -1.92393966 |
| C | -2.60700345 | 1.62593060  | -0.45719579 |
| C | -4.20205471 | 0.20863126  | 1.41701722  |
| C | -1.48707610 | 0.26560809  | -2.68450037 |
| C | -3.55725127 | -3.92931310 | -1.16337895 |
| C | -4.67717862 | -2.56899059 | 1.06392564  |
| C | -1.96220001 | -2.51201376 | -3.03759195 |
| C | -3.96449276 | 1.59744218  | 1.59356301  |
| C | -1.24951415 | 1.65441901  | -2.50795458 |
| C | -4.91474058 | -3.95780151 | 0.88737985  |
| C | -2.19976197 | -3.90082468 | -3.21413774 |
| C | -3.16696712 | 2.30609191  | 0.65645651  |
| C | -1.80947782 | 2.33458032  | -1.39430228 |
| C | -4.35477691 | -4.63796282 | -0.22627245 |
| C | -2.99728760 | -4.60947441 | -2.27703124 |
| C | -4.99958021 | -0.50001841 | 2.35412352  |
| C | -0.92711256 | -0.41455317 | -3.79815246 |
| C | -5.23714217 | -1.88882933 | 2.17757773  |
| C | -1.16467451 | -1.80336410 | -3.97469825 |
| H | -2.98461323 | 3.37215095  | 0.79197405  |
| H | -1.62712393 | 3.40063936  | -1.25878474 |
| H | -4.53713080 | -5.70402186 | -0.36178999 |

|   |             |             |             |
|---|-------------|-------------|-------------|
| H | -3.17964149 | -5.67553345 | -2.41254878 |
| H | -5.42941153 | 0.02207724  | 3.20896938  |
| H | -5.84932739 | -2.43279284 | 2.89690603  |
| H | -0.31492733 | 0.12941034  | -4.51748077 |
| H | -0.73484319 | -2.32545974 | -4.82954411 |
| H | -4.39432394 | 2.11953789  | 2.44840867  |
| H | -5.52692568 | -4.50176508 | 1.60670795  |
| H | -0.63732905 | 2.19838257  | -3.22728268 |
| H | -1.76993079 | -4.42292039 | -4.06898340 |
| C | 9.15293562  | 2.70712141  | 0.08185964  |
| C | 9.18635539  | 2.52369984  | -2.75201389 |
| C | 8.91579443  | 3.86356261  | -0.70732214 |
| C | 9.40678669  | 1.45896942  | -0.54589535 |
| C | 8.93250432  | 3.77185183  | -2.12425890 |
| C | 9.42349657  | 1.36725864  | -1.96283212 |
| C | 9.13622573  | 2.79883219  | 1.49879640  |
| C | 8.66194336  | 5.11171460  | -0.07956715 |
| C | 9.64392788  | 0.30252821  | 0.24328642  |
| C | 9.20306527  | 2.43198906  | -4.16895065 |
| C | 8.69536313  | 4.92829304  | -2.91344067 |
| C | 9.67734765  | 0.11910665  | -2.59058711 |
| C | 8.64523347  | 5.20342538  | 1.33736962  |
| C | 9.62721799  | 0.39423899  | 1.66022318  |
| C | 8.71207301  | 4.83658226  | -4.33037744 |
| C | 9.69405753  | 0.02739587  | -4.00752387 |
| C | 8.88237466  | 4.04698418  | 2.12655145  |
| C | 9.37336692  | 1.64239098  | 2.28797823  |

|   |             |             |             |
|---|-------------|-------------|-------------|
| C | 8.96592409  | 3.58843027  | -4.95813249 |
| C | 9.45691635  | 1.18383707  | -4.79670570 |
| C | 8.42480222  | 6.26815557  | -0.86874890 |
| C | 9.89777890  | -0.94562354 | -0.38446859 |
| C | 8.44151210  | 6.17644479  | -2.28568567 |
| C | 9.91448879  | -1.03733432 | -1.80140535 |
| H | 8.86954806  | 4.11738189  | 3.21420004  |
| H | 9.36054032  | 1.71278869  | 3.37562682  |
| H | 8.97875069  | 3.51803256  | -6.04578108 |
| H | 9.46974295  | 1.11343936  | -5.88435429 |
| H | 8.22994469  | 7.22624416  | -0.38688061 |
| H | 8.25948117  | 7.06413567  | -2.89146608 |
| H | 10.07980983 | -1.83331442 | 0.22131183  |
| H | 10.10934632 | -1.99542291 | -2.28327364 |
| H | 8.45037599  | 6.16151374  | 1.81923799  |
| H | 8.53004213  | 5.72427290  | -4.93615789 |
| H | 9.80924887  | -0.49345165 | 2.26600364  |
| H | 9.88891502  | -0.93069249 | -4.48939224 |
| C | 4.90008266  | 5.20526337  | -2.93544981 |
| C | 5.50121882  | 2.66510672  | -4.05430593 |
| C | 5.21562900  | 4.11197680  | -2.08600584 |
| C | 4.88510439  | 5.02847161  | -4.34432184 |
| C | 5.51619708  | 2.84189848  | -2.64543390 |
| C | 5.18567247  | 3.75839329  | -4.90374990 |
| C | 4.59951458  | 6.47534170  | -2.37602175 |
| C | 5.23060727  | 4.28876856  | -0.67713381 |
| C | 4.56955805  | 6.12175818  | -5.19376582 |

|   |            |             |             |
|---|------------|-------------|-------------|
| C | 5.80178689 | 1.39502839  | -4.61373399 |
| C | 5.83174342 | 1.74861191  | -1.79598993 |
| C | 5.17069421 | 3.58160153  | -6.31262194 |
| C | 4.93003919 | 5.55884689  | -0.11770575 |
| C | 4.26898997 | 7.39183651  | -4.63433776 |
| C | 6.13231150 | 0.47853358  | -2.35541799 |
| C | 5.47126228 | 2.31152320  | -6.87204999 |
| C | 4.61449284 | 6.65213351  | -0.96714970 |
| C | 4.28396823 | 7.56862832  | -3.22546570 |
| C | 6.11733325 | 0.30174177  | -3.76429004 |
| C | 5.78680864 | 1.21823658  | -6.02260605 |
| C | 5.54615358 | 3.19548208  | 0.17230995  |
| C | 4.55457982 | 5.94496633  | -6.60263763 |
| C | 5.84672166 | 1.92540376  | -0.38711811 |
| C | 4.85514789 | 4.67488801  | -7.16206569 |
| H | 4.38377510 | 7.62705274  | -0.53772959 |
| H | 4.05325049 | 8.54354755  | -2.79604559 |
| H | 6.34805099 | -0.67317746 | -4.19371015 |
| H | 6.01752638 | 0.24331735  | -6.45202615 |
| H | 5.55765099 | 3.33118843  | 1.25376816  |
| H | 6.08893683 | 1.08619076  | 0.26491994  |
| H | 4.31236465 | 6.78417933  | -7.25467568 |
| H | 4.84365049 | 4.53918166  | -8.24352390 |
| H | 4.94153655 | 5.69455337  | 0.96375227  |
| H | 6.37452665 | -0.36067938 | -1.70338017 |
| H | 4.02677482 | 8.23104947  | -5.28637557 |
| H | 5.45976492 | 2.17581671  | -7.95350801 |

|   |             |             |             |
|---|-------------|-------------|-------------|
| C | 2.80316942  | -6.28117463 | -0.29480455 |
| C | 5.14773928  | -4.94356773 | -1.17764060 |
| C | 3.95017093  | -6.23259653 | 0.54091537  |
| C | 2.82845285  | -5.66094928 | -1.57194250 |
| C | 5.12245586  | -5.56379308 | 0.09949735  |
| C | 4.00073777  | -4.99214583 | -2.01336053 |
| C | 1.63088449  | -6.94997807 | 0.14661347  |
| C | 3.92488751  | -6.85282188 | 1.81805332  |
| C | 1.68145134  | -5.70952737 | -2.40766242 |
| C | 6.32002421  | -4.27476429 | -1.61905863 |
| C | 6.26945736  | -5.51521499 | 0.93521727  |
| C | 4.02602120  | -4.37192048 | -3.29049847 |
| C | 2.75260258  | -7.52162533 | 2.25947134  |
| C | 0.50916641  | -6.37833082 | -1.96624440 |
| C | 7.44174229  | -4.84641154 | 0.49379924  |
| C | 5.19830613  | -3.70311703 | -3.73191650 |
| C | 1.60560102  | -7.57020345 | 1.42375144  |
| C | 0.48388294  | -6.99855620 | -0.68910643 |
| C | 7.46702577  | -4.22618616 | -0.78333872 |
| C | 6.34530768  | -3.65453891 | -2.89619659 |
| C | 5.07188890  | -6.80424373 | 2.65377304  |
| C | 1.70673487  | -5.08930208 | -3.68480017 |
| C | 6.24417383  | -6.13544028 | 2.21235501  |
| C | 2.87901980  | -4.42049863 | -4.12621819 |
| H | 0.70574855  | -8.08358072 | 1.76258639  |
| H | -0.41596953 | -7.51193347 | -0.35027148 |
| H | 8.36687824  | -3.71280889 | -1.12217367 |



|   |             |             |             |
|---|-------------|-------------|-------------|
| H | 7.24516015  | -3.14116164 | -3.23503154 |
| H | 5.05248122  | -7.28033224 | 3.63411141  |
| H | 7.12461872  | -6.09815147 | 2.85385841  |
| H | 0.82628998  | -5.12659089 | -4.32630356 |
| H | 2.89842748  | -3.94441012 | -5.10655657 |
| H | 2.73319474  | -7.99771381 | 3.23980954  |
| H | 8.32218712  | -4.80912264 | 1.13530241  |
| H | -0.37127842 | -6.41561972 | -2.60774757 |
| H | 5.21771397  | -3.22702855 | -4.71225469 |
| C | 1.36959851  | 2.97490749  | 6.64374832  |
| C | 3.77973728  | 3.32110157  | 5.18190691  |
| C | 1.66418554  | 4.22938139  | 6.04716320  |
| C | 2.28008087  | 1.89353064  | 6.50941274  |
| C | 2.86925492  | 4.40247842  | 5.31624250  |
| C | 3.48515025  | 2.06662767  | 5.77849204  |
| C | 0.16452913  | 2.80181045  | 7.37466903  |
| C | 0.75370318  | 5.31075824  | 6.18149878  |
| C | 1.98549384  | 0.63905674  | 7.10599787  |
| C | 4.98480666  | 3.49419861  | 4.45098621  |
| C | 3.16384195  | 5.65695232  | 4.71965737  |
| C | 4.39563261  | 0.98525082  | 5.64415646  |
| C | -0.45136620 | 5.13766121  | 6.91241949  |
| C | 0.78042446  | 0.46595970  | 7.83691857  |
| C | 4.36891133  | 5.83004936  | 3.98873667  |
| C | 5.60070199  | 1.15834785  | 4.91323575  |
| C | -0.74595328 | 3.88318730  | 7.50900464  |
| C | -0.13005794 | 1.54733655  | 7.97125418  |

|   |             |             |             |
|---|-------------|-------------|-------------|
| C | 5.27939374  | 4.74867251  | 3.85440106  |
| C | 5.89528907  | 2.41282176  | 4.31665060  |
| C | 1.04829027  | 6.56523191  | 5.58491370  |
| C | 2.89597614  | -0.44231989 | 6.97166224  |
| C | 2.25335965  | 6.73832895  | 4.85399300  |
| C | 4.10104552  | -0.26922285 | 6.24074153  |
| H | -1.67097128 | 3.75031705  | 8.07006346  |
| H | -1.05507595 | 1.41446630  | 8.53231301  |
| H | 6.20441174  | 4.88154276  | 3.29334223  |
| H | 6.82030707  | 2.54569201  | 3.75559177  |
| H | 0.34939883  | 7.39530297  | 5.68803045  |
| H | 2.47948632  | 7.70127027  | 4.39605086  |
| H | 2.66984948  | -1.40526121 | 7.42960438  |
| H | 4.79993696  | -1.09929391 | 6.13762479  |
| H | -1.15025763 | 5.96773203  | 7.01553631  |
| H | 4.59503811  | 6.79299046  | 3.53079455  |
| H | 0.55429769  | -0.49698140 | 8.29486069  |
| H | 6.29959342  | 0.32827703  | 4.81011893  |
| C | -4.59465512 | -0.18430839 | -4.61523500 |
| C | -4.26759082 | 2.53386464  | -3.86014307 |
| C | -3.75674706 | 0.66928768  | -5.38053488 |
| C | -5.26903103 | 0.32118205  | -3.47238916 |
| C | -3.59321491 | 2.02837420  | -5.00298891 |
| C | -5.10549888 | 1.68026857  | -3.09484319 |
| C | -4.75818726 | -1.54339491 | -4.99278096 |
| C | -3.08237115 | 0.16379724  | -6.52338072 |
| C | -6.10693909 | -0.53241402 | -2.70708928 |

|   |             |             |             |
|---|-------------|-------------|-------------|
| C | -4.10405868 | 3.89295116  | -3.48259710 |
| C | -2.75530685 | 2.88197028  | -5.76828879 |
| C | -5.77987479 | 2.18575901  | -1.95199735 |
| C | -3.24590329 | -1.19528927 | -6.90092668 |
| C | -6.27047123 | -1.89150054 | -3.08463524 |
| C | -2.59177471 | 4.24105679  | -5.39074283 |
| C | -5.61634265 | 3.54484553  | -1.57445138 |
| C | -4.08381136 | -2.04888541 | -6.13562682 |
| C | -5.59609533 | -2.39699104 | -4.22748110 |
| C | -3.26615061 | 4.74654729  | -4.24789697 |
| C | -4.77843458 | 4.39844166  | -2.33975125 |
| C | -2.24446323 | 1.01739328  | -7.28868041 |
| C | -6.78131485 | -0.02692355 | -1.56424362 |
| C | -2.08093109 | 2.37647980  | -6.91113445 |
| C | -6.61778271 | 1.33216297  | -1.18669766 |
| H | -4.20933955 | -3.09212782 | -6.42543322 |
| H | -5.72162352 | -3.44023346 | -4.51728749 |
| H | -3.14062242 | 5.78978971  | -3.95809057 |
| H | -4.65290639 | 5.44168407  | -2.04994485 |
| H | -1.72680843 | 0.62937595  | -8.16593540 |
| H | -1.43774808 | 3.03170500  | -7.49858301 |
| H | -7.42449786 | -0.68214875 | -0.97679506 |
| H | -7.13543751 | 1.72018030  | -0.30944267 |
| H | -2.72824864 | -1.58330669 | -7.77818150 |
| H | -1.94859184 | 4.89628202  | -5.97819119 |
| H | -6.91365410 | -2.54672577 | -2.49718688 |
| H | -6.13399730 | 3.93286295  | -0.69719656 |

Cs        0.20465800        0.10074000        0.48149700

397

n = 11, Energy = -1079.32939201

|   |             |              |             |
|---|-------------|--------------|-------------|
| C | 7.87023105  | -10.12774243 | 2.42881016  |
| C | 9.28529144  | -8.30736264  | 4.08694798  |
| C | 8.85288032  | -9.27109958  | 1.86581503  |
| C | 7.59511197  | -10.07419539 | 3.82087420  |
| C | 9.56041051  | -8.36090969  | 2.69488395  |
| C | 8.30264216  | -9.16400550  | 4.64994311  |
| C | 7.16270086  | -11.03793233 | 1.59974125  |
| C | 9.12799940  | -9.32464662  | 0.47375100  |
| C | 6.61246270  | -10.93083824 | 4.38386932  |
| C | 9.99282163  | -7.39717275  | 4.91601690  |
| C | 10.54305979 | -7.50426684  | 2.13188882  |
| C | 8.02752308  | -9.11045845  | 6.04200715  |
| C | 8.42046921  | -10.23483652 | -0.35531791 |
| C | 5.90493251  | -11.84102814 | 3.55480041  |
| C | 11.25058998 | -6.59407694  | 2.96095773  |
| C | 8.73505328  | -8.20026856  | 6.87107606  |
| C | 7.43781991  | -11.09147941 | 0.20767718  |
| C | 6.18005156  | -11.89457522 | 2.16273634  |
| C | 10.97547093 | -6.54052986  | 4.35302181  |
| C | 9.71770258  | -7.34362567  | 6.30808097  |
| C | 10.11064855 | -8.46800385  | -0.08924394 |
| C | 6.33734374  | -10.87729112 | 5.77593317  |
| C | 10.81817874 | -7.55781396  | 0.73982497  |
| C | 7.04487393  | -9.96710123  | 6.60500208  |

|   |             |              |             |
|---|-------------|--------------|-------------|
| H | 6.89471577  | -11.79014626 | -0.42872076 |
| H | 5.63694742  | -12.59324207 | 1.52633840  |
| H | 11.51857506 | -5.84186300  | 4.98941974  |
| H | 10.26080671 | -6.64495881  | 6.94447890  |
| H | 10.32183154 | -8.50910685  | -1.15780023 |
| H | 11.57246592 | -6.90025002  | 0.30766669  |
| H | 5.58305656  | -11.53485505 | 6.20809146  |
| H | 6.83369095  | -9.92599822  | 7.67355837  |
| H | 8.63165204  | -10.27593964 | -1.42387405 |
| H | 12.00487707 | -5.93651305  | 2.52879967  |
| H | 5.15064542  | -12.49859203 | 3.98695847  |
| H | 8.52387044  | -8.15916544  | 7.93963220  |
| C | 7.42247927  | 2.18098501   | 0.87765548  |
| C | 5.80240960  | 3.30659663   | -1.16537468 |
| C | 6.77165686  | 3.42472150   | 1.09201454  |
| C | 7.26326684  | 1.50005433   | -0.35821866 |
| C | 5.96162202  | 3.98752731   | 0.07049946  |
| C | 6.45323201  | 2.06286014   | -1.37973374 |
| C | 8.23251411  | 1.61817920   | 1.89917056  |
| C | 6.93086929  | 4.10565218   | 2.32788868  |
| C | 7.91408926  | 0.25631784   | -0.57257772 |
| C | 4.99237476  | 3.86940244   | -2.18688976 |
| C | 5.31079961  | 5.23126380   | 0.28485852  |
| C | 6.29401958  | 1.38192946   | -2.61560788 |
| C | 7.74090412  | 3.54284637   | 3.34940376  |
| C | 8.72412409  | -0.30648797  | 0.44893736  |
| C | 4.50076478  | 5.79406961   | -0.73665656 |

|   |            |             |             |
|---|------------|-------------|-------------|
| C | 5.48398474 | 1.94473527  | -3.63712296 |
| C | 8.39172657 | 2.29910985  | 3.13504474  |
| C | 8.88333655 | 0.37444268  | 1.68481154  |
| C | 4.34155231 | 5.11313896  | -1.97253074 |
| C | 4.83316230 | 3.18847179  | -3.42276394 |
| C | 6.28004692 | 5.34938848  | 2.54224760  |
| C | 7.75487678 | -0.42461266 | -1.80845172 |
| C | 5.47001209 | 5.91219430  | 1.52073252  |
| C | 6.94484194 | 0.13819316  | -2.82996680 |
| H | 9.01351384 | 1.86709696  | 3.91916544  |
| H | 9.50512383 | -0.05757021 | 2.46893224  |
| H | 3.71976504 | 5.54515185  | -2.75665143 |
| H | 4.21137502 | 3.62048468  | -4.20688463 |
| H | 6.40225928 | 5.87207477  | 3.49091163  |
| H | 4.97043710 | 6.86689352  | 1.68527577  |
| H | 8.25445177 | -1.37931188 | -1.97299497 |
| H | 6.82262959 | -0.38449313 | -3.77863083 |
| H | 7.86311656 | 4.06553244  | 4.29806770  |
| H | 4.00118980 | 6.74876868  | -0.57211349 |
| H | 9.22369907 | -1.26118704 | 0.28439429  |
| H | 5.36177231 | 1.42204920  | -4.58578689 |
| C | 3.32391914 | 3.42195623  | 3.50719050  |
| C | 4.73678669 | 0.98654302  | 3.13548187  |
| C | 3.26097335 | 2.74801212  | 2.25889677  |
| C | 4.09329871 | 2.87819373  | 4.56962992  |
| C | 3.96740712 | 1.53030551  | 2.07304246  |
| C | 4.79973248 | 1.66048713  | 4.38377560  |

|   |            |             |             |
|---|------------|-------------|-------------|
| C | 2.61748537 | 4.63966283  | 3.69304482  |
| C | 2.49159378 | 3.29177461  | 1.19645736  |
| C | 4.15624450 | 3.55213785  | 5.81792365  |
| C | 5.44322046 | -0.23116359 | 2.94962756  |
| C | 3.90446133 | 0.85636140  | 0.82474873  |
| C | 5.56911204 | 1.11672463  | 5.44621502  |
| C | 1.78516001 | 4.50948121  | 1.38231167  |
| C | 3.44981073 | 4.76984445  | 6.00377797  |
| C | 4.61089510 | -0.36134521 | 0.63889441  |
| C | 6.27554582 | -0.10098197 | 5.26036071  |
| C | 1.84810577 | 5.18342538  | 2.63060541  |
| C | 2.68043113 | 5.31360700  | 4.94133856  |
| C | 5.38027470 | -0.90510775 | 1.70133382  |
| C | 6.21260005 | -0.77492613 | 4.01206697  |
| C | 2.42864807 | 2.61783051  | -0.05183615 |
| C | 4.92562398 | 3.00837534  | 6.88036284  |
| C | 3.13508184 | 1.40012391  | -0.23769046 |
| C | 5.63205776 | 1.79066873  | 6.69450853  |
| H | 1.30584326 | 6.11814378  | 2.77326822  |
| H | 2.13816861 | 6.24832540  | 5.08400137  |
| H | 5.92253721 | -1.83982616 | 1.55867101  |
| H | 6.75486257 | -1.70964454 | 3.86940415  |
| H | 1.83806793 | 3.03522569  | -0.86737071 |
| H | 3.08676428 | 0.88280057  | -1.19588786 |
| H | 4.97394155 | 3.52569867  | 7.83856024  |
| H | 6.22263789 | 1.37327356  | 7.51004309  |
| H | 1.19457992 | 4.92687646  | 0.56677734  |

|   |             |             |             |
|---|-------------|-------------|-------------|
| H | 4.56257765  | -0.87866858 | -0.31930277 |
| H | 3.49812818  | 5.28716782  | 6.96197514  |
| H | 6.86612590  | -0.51837721 | 6.07589504  |
| C | -1.36264319 | -1.78303406 | 3.21549361  |
| C | -3.36462214 | 0.01018454  | 4.13312471  |
| C | -0.99691771 | -0.50260946 | 3.70860395  |
| C | -2.72935814 | -2.16684935 | 3.18119882  |
| C | -1.99790718 | 0.39399984  | 4.16741950  |
| C | -3.73034762 | -1.27024005 | 3.64001438  |
| C | -0.36165371 | -2.67964336 | 2.75667806  |
| C | 0.36979724  | -0.11879417 | 3.74289873  |
| C | -3.09508362 | -3.44727395 | 2.68808849  |
| C | -4.36561161 | 0.90679385  | 4.59194027  |
| C | -1.63218170 | 1.67442443  | 4.66052984  |
| C | -5.09706257 | -1.65405535 | 3.60571959  |
| C | 1.37078672  | -1.01540347 | 3.28408318  |
| C | -2.09409415 | -4.34388325 | 2.22927293  |
| C | -2.63317118 | 2.57103374  | 5.11934539  |
| C | -6.09805204 | -0.75744604 | 4.06453514  |
| C | 1.00506128  | -2.29582810 | 2.79097282  |
| C | -0.72737915 | -3.96006799 | 2.26356770  |
| C | -3.99988617 | 2.18721848  | 5.08505062  |
| C | -5.73232661 | 0.52297859  | 4.55764550  |
| C | 0.73552256  | 1.16163027  | 4.23600902  |
| C | -4.46179841 | -3.83108908 | 2.65379375  |
| C | -0.26546692 | 2.05823957  | 4.69482457  |
| C | -5.46278788 | -2.93447978 | 3.11260930  |



|   |             |             |             |
|---|-------------|-------------|-------------|
| H | 1.77342640  | -2.98407042 | 2.43878344  |
| H | 0.04098597  | -4.64831031 | 1.91137831  |
| H | -4.76825130 | 2.87546080  | 5.43724001  |
| H | -6.50069173 | 1.21122091  | 4.90983489  |
| H | 1.78462074  | 1.45624909  | 4.26233390  |
| H | 0.01526606  | 3.04110079  | 5.07333887  |
| H | -4.74253139 | -4.81395030 | 2.27527945  |
| H | -6.51188607 | -3.22909861 | 3.08628443  |
| H | 2.41988478  | -0.72078484 | 3.31040799  |
| H | -2.35243841 | 3.55389483  | 5.49785966  |
| H | -2.37482692 | -5.32674435 | 1.85075866  |
| H | -7.14715011 | -1.05206467 | 4.03821033  |
| C | 6.73005520  | -7.03951922 | -1.13020007 |
| C | 6.18973190  | -6.88084930 | 1.65340803  |
| C | 5.74917117  | -7.88528256 | -0.54800513 |
| C | 7.44077758  | -6.11442091 | -0.32059097 |
| C | 5.47900952  | -7.80594761 | 0.84379893  |
| C | 7.17061593  | -6.03508596 | 1.07121309  |
| C | 7.00021685  | -7.11885417 | -2.52200413 |
| C | 5.03844879  | -8.81038087 | -1.35761423 |
| C | 8.42166161  | -5.26865757 | -0.90278592 |
| C | 5.91957025  | -6.80151435 | 3.04521209  |
| C | 4.49812549  | -8.65171095 | 1.42599388  |
| C | 7.88133831  | -5.10998765 | 1.88082219  |
| C | 5.30861044  | -8.88971582 | -2.74941829 |
| C | 8.69182326  | -5.34799252 | -2.29458997 |
| C | 4.22796384  | -8.57237600 | 2.81779793  |

|   |            |              |             |
|---|------------|--------------|-------------|
| C | 7.61117666 | -5.03065270  | 3.27262625  |
| C | 6.28949448 | -8.04395248  | -3.33161329 |
| C | 7.98110089 | -6.27309083  | -3.10419914 |
| C | 4.93868621 | -7.64727769  | 3.62740710  |
| C | 6.63029262 | -5.87641604  | 3.85482125  |
| C | 4.05756492 | -9.65614404  | -0.77541926 |
| C | 9.13238382 | -4.34355943  | -0.09317683 |
| C | 3.78740327 | -9.57680908  | 0.61638479  |
| C | 8.86222217 | -4.26422448  | 1.29862722  |
| H | 6.49687208 | -8.10485044  | -4.39996987 |
| H | 8.18847849 | -6.33398879  | -4.17255572 |
| H | 4.73130861 | -7.58637973  | 4.69576368  |
| H | 6.42291502 | -5.81551808  | 4.92317783  |
| H | 3.51201036 | -10.36625478 | -1.39687981 |
| H | 3.03447109 | -10.22602186 | 1.06328094  |
| H | 9.88531600 | -3.69434666  | -0.54007298 |
| H | 9.40777674 | -3.55411374  | 1.92008777  |
| H | 4.76305605 | -9.59982639  | -3.37087887 |
| H | 3.47503181 | -9.22158860  | 3.26469416  |
| H | 9.44475529 | -4.69877992  | -2.74148620 |
| H | 8.15673105 | -4.32054212  | 3.89408683  |
| C | 2.96293033 | -6.21194474  | -3.92501059 |
| C | 2.42502789 | -6.22696454  | -1.13645633 |
| C | 1.94087504 | -7.04854601  | -3.40356898 |
| C | 3.71603441 | -5.38285337  | -3.05217508 |
| C | 1.67192381 | -7.05605591  | -2.00929184 |
| C | 3.44708319 | -5.39036327  | -1.65789795 |

|   |             |             |             |
|---|-------------|-------------|-------------|
| C | 3.23188156  | -6.20443484 | -5.31928773 |
| C | 1.18777096  | -7.87763737 | -4.27640449 |
| C | 4.73808970  | -4.54625210 | -3.57361670 |
| C | 2.15607667  | -6.23447444 | 0.25782080  |
| C | 0.64986852  | -7.89265718 | -1.48785023 |
| C | 4.20018726  | -4.56127190 | -0.78506244 |
| C | 1.45672218  | -7.87012747 | -5.67068162 |
| C | 5.00704093  | -4.53874220 | -4.96789383 |
| C | 0.38091729  | -7.90016708 | -0.09357309 |
| C | 3.93123604  | -4.56878181 | 0.60921470  |
| C | 2.47877749  | -7.03352620 | -6.19212330 |
| C | 4.25393686  | -5.36783357 | -5.84072940 |
| C | 1.13402136  | -7.07107571 | 0.77926248  |
| C | 2.90918073  | -5.40538308 | 1.13065637  |
| C | 0.16571584  | -8.71423848 | -3.75496284 |
| C | 5.49119361  | -3.71716089 | -2.70078122 |
| C | -0.10323539 | -8.72174838 | -2.36068570 |
| C | 5.22224239  | -3.72467080 | -1.30650409 |
| H | 2.68522596  | -7.02776156 | -7.26237823 |
| H | 4.46038533  | -5.36206892 | -6.91098433 |
| H | 0.92757289  | -7.07684036 | 1.84951741  |
| H | 2.70273227  | -5.41114772 | 2.20091130  |
| H | -0.41237116 | -9.35065375 | -4.42495634 |
| H | -0.88777087 | -9.36392830 | -1.96042416 |
| H | 6.27572909  | -3.07498098 | -3.10104276 |
| H | 5.80032938  | -3.08825553 | -0.63651059 |
| H | 0.87863537  | -8.50654258 | -6.34067515 |

|   |             |             |             |
|---|-------------|-------------|-------------|
| H | -0.40361803 | -8.54234683 | 0.30668854  |
| H | 5.79157625  | -3.89656245 | -5.36815547 |
| H | 4.50932285  | -3.93236670 | 1.27920822  |
| C | 0.73581689  | -4.01493346 | 5.77889245  |
| C | -1.24014344 | -2.29134266 | 6.86995386  |
| C | -0.61448224 | -4.44624850 | 5.86291428  |
| C | 1.09813586  | -2.72182303 | 6.24040132  |
| C | -1.60246241 | -3.58445309 | 6.40844498  |
| C | 0.11015569  | -1.86002762 | 6.78593203  |
| C | 1.72379706  | -4.87672887 | 5.23336174  |
| C | -0.97680121 | -5.73935894 | 5.40140541  |
| C | 2.44843499  | -2.29050799 | 6.15637949  |
| C | -2.22812361 | -1.42954725 | 7.41548456  |
| C | -2.95276154 | -4.01576813 | 6.49246682  |
| C | 0.47247466  | -0.56691719 | 7.24744090  |
| C | 0.01117896  | -6.60115434 | 4.85587470  |
| C | 3.43641516  | -3.15230340 | 5.61084879  |
| C | -3.94074171 | -3.15397272 | 7.03799752  |
| C | -0.51550551 | 0.29487822  | 7.79297160  |
| C | 1.36147813  | -6.16983934 | 4.77185285  |
| C | 3.07409623  | -4.44541387 | 5.14933989  |
| C | -3.57842279 | -1.86086225 | 7.49950642  |
| C | -1.86580469 | -0.13643678 | 7.87699346  |
| C | -2.32710018 | -6.17067380 | 5.48542727  |
| C | 2.81075379  | -0.99739772 | 6.61788833  |
| C | -3.31508034 | -5.30887840 | 6.03095798  |
| C | 1.82277362  | -0.13560232 | 7.16341903  |

|   |             |             |             |
|---|-------------|-------------|-------------|
| H | 2.11985724  | -6.83135832 | 4.35310043  |
| H | 3.83247534  | -5.10693285 | 4.73058747  |
| H | -4.33680189 | -1.19934328 | 7.91825884  |
| H | -2.62418379 | 0.52508220  | 8.29574588  |
| H | -2.60521830 | -7.16327275 | 5.13117044  |
| H | -4.35157766 | -5.63995829 | 6.09545361  |
| H | 3.84725110  | -0.66631783 | 6.55339270  |
| H | 2.10089175  | 0.85699662  | 7.51767587  |
| H | -0.26693896 | -7.59375315 | 4.50161788  |
| H | -4.97723890 | -3.48505242 | 7.10249321  |
| H | 4.47291235  | -2.82122370 | 5.54635310  |
| H | -0.23738759 | 1.28747703  | 8.14722843  |
| C | 0.70051635  | -3.71503932 | -6.29359549 |
| C | 0.19401531  | -3.80937325 | -3.50071932 |
| C | 1.48822333  | -2.93917505 | -5.40255541 |
| C | -0.34044116 | -4.53807055 | -5.78819749 |
| C | 1.23497281  | -2.98634202 | -4.00611733 |
| C | -0.59369168 | -4.58523752 | -4.39175940 |
| C | 0.95376687  | -3.66787235 | -7.69003358 |
| C | 2.52918084  | -2.11614382 | -5.90795342 |
| C | -1.12814814 | -5.31393481 | -6.67923757 |
| C | -0.05923521 | -3.85654022 | -2.10428123 |
| C | 2.02267980  | -2.21047776 | -3.11507724 |
| C | -1.63464918 | -5.40826875 | -3.88636140 |
| C | 2.78243136  | -2.06897686 | -7.30439150 |
| C | -0.87489762 | -5.26676784 | -8.07567566 |
| C | 1.76942928  | -2.25764473 | -1.71863916 |

|   |             |             |             |
|---|-------------|-------------|-------------|
| C | -1.88789970 | -5.45543571 | -2.48992331 |
| C | 1.99472438  | -2.84484112 | -8.19543164 |
| C | 0.16605989  | -4.44373661 | -8.58107372 |
| C | 0.72847176  | -3.08067596 | -1.21324109 |
| C | -1.10019273 | -4.67957145 | -1.59888317 |
| C | 3.31688764  | -1.34027972 | -5.01691337 |
| C | -2.16910547 | -6.13696589 | -6.17383953 |
| C | 3.06363713  | -1.38744668 | -3.62047529 |
| C | -2.42235599 | -6.18413285 | -4.77740144 |
| H | 2.18912090  | -2.80863549 | -9.26734534 |
| H | 0.36045641  | -4.40753098 | -9.65298741 |
| H | 0.53407525  | -3.11688159 | -0.14132740 |
| H | -1.29458924 | -4.71577708 | -0.52696948 |
| H | 4.11593257  | -0.70851624 | -5.40485975 |
| H | 3.66828551  | -0.79188884 | -2.93650785 |
| H | -2.77375386 | -6.73252373 | -6.85780696 |
| H | -3.22140091 | -6.81589633 | -4.38945507 |
| H | 3.58147611  | -1.43721354 | -7.69233797 |
| H | 2.37407748  | -1.66208704 | -1.03467170 |
| H | -1.47954582 | -5.86232553 | -8.75964311 |
| H | -2.68694446 | -6.08719903 | -2.10197684 |
| C | -3.31920556 | -0.01419848 | -5.47018368 |
| C | -3.93379108 | 2.47353736  | -4.24582484 |
| C | -2.64053223 | 1.16462667  | -5.87782797 |
| C | -4.30517164 | 0.05084429  | -4.45035997 |
| C | -2.94782499 | 2.40849459  | -5.26564855 |
| C | -4.61246440 | 1.29471221  | -3.83818055 |

|   |             |             |             |
|---|-------------|-------------|-------------|
| C | -3.01191280 | -1.25806639 | -6.08236310 |
| C | -1.65456615 | 1.09958390  | -6.89765168 |
| C | -4.98384496 | -1.12798085 | -4.04271567 |
| C | -4.24108383 | 3.71740528  | -3.63364542 |
| C | -2.26915167 | 3.58731974  | -5.67329284 |
| C | -5.59843048 | 1.35975498  | -2.81835684 |
| C | -1.34727339 | -0.14428402 | -7.50983110 |
| C | -4.67655220 | -2.37184877 | -4.65489509 |
| C | -2.57644443 | 4.83118766  | -5.06111342 |
| C | -5.90572324 | 2.60362290  | -2.20617742 |
| C | -2.02594670 | -1.32310922 | -7.10218683 |
| C | -3.69058611 | -2.43689159 | -5.67471883 |
| C | -3.56241053 | 4.89623048  | -4.04128969 |
| C | -5.22704993 | 3.78244810  | -2.61382168 |
| C | -0.97589299 | 2.27840894  | -7.30529583 |
| C | -5.96981088 | -1.06293798 | -3.02289210 |
| C | -1.28318575 | 3.52227686  | -6.69311641 |
| C | -6.27710364 | 0.18092994  | -2.41071268 |
| H | -1.79006706 | -2.27790919 | -7.57209918 |
| H | -3.45470646 | -3.39169157 | -6.14463118 |
| H | -3.79829017 | 5.85103045  | -3.57137734 |
| H | -5.46292957 | 4.73724807  | -2.14390934 |
| H | -0.21905980 | 2.22848176  | -8.08811833 |
| H | -0.76223223 | 4.42714976  | -7.00602651 |
| H | -6.49076440 | -1.96781087 | -2.70998201 |
| H | -7.03393683 | 0.23085712  | -1.62789019 |
| H | -0.59044035 | -0.19421136 | -8.29265348 |

|   |             |             |             |
|---|-------------|-------------|-------------|
| H | -2.05549108 | 5.73606050  | -5.37402335 |
| H | -5.19750555 | -3.27672161 | -4.34198516 |
| H | -6.66255628 | 2.65355024  | -1.42335503 |
| C | -2.68323319 | 2.57869881  | -0.22686798 |
| C | -0.71371139 | 2.89660089  | -2.24813532 |
| C | -2.30044887 | 1.46907212  | -1.02599555 |
| C | -2.08125661 | 3.84727653  | -0.43837409 |
| C | -1.31568797 | 1.62802316  | -2.03662922 |
| C | -1.09649571 | 4.00622757  | -1.44900776 |
| C | -3.66799409 | 2.41974777  | 0.78376569  |
| C | -2.90242545 | 0.20049440  | -0.81448944 |
| C | -2.46404092 | 4.95690321  | 0.36075348  |
| C | 0.27104951  | 3.05555193  | -3.25876899 |
| C | -0.93290365 | 0.51839648  | -2.83575678 |
| C | -0.49451913 | 5.27480529  | -1.66051386 |
| C | -3.88718635 | 0.04154336  | 0.19614423  |
| C | -3.44880182 | 4.79795218  | 1.37138715  |
| C | 0.05185725  | 0.67734752  | -3.84639045 |
| C | 0.49024177  | 5.43375633  | -2.67114753 |
| C | -4.26997071 | 1.15117004  | 0.99527184  |
| C | -4.05077845 | 3.52937444  | 1.58289329  |
| C | 0.65383388  | 1.94592525  | -4.05789660 |
| C | 0.87302614  | 4.32412966  | -3.47027514 |
| C | -2.51964111 | -0.90913205 | -1.61361695 |
| C | -1.86206437 | 6.22548071  | 0.14924731  |
| C | -1.53488021 | -0.75018101 | -2.62425062 |
| C | -0.87730347 | 6.38443175  | -0.86138636 |



|   |             |             |             |
|---|-------------|-------------|-------------|
| H | -5.02587869 | 1.02915833  | 1.77103990  |
| H | -4.80668642 | 3.40736274  | 2.35866136  |
| H | 1.40974185  | 2.06793696  | -4.83366466 |
| H | 1.62893411  | 4.44614136  | -4.24604320 |
| H | -2.98172175 | -1.88289956 | -1.45126367 |
| H | -1.24105279 | -1.60193680 | -3.23766548 |
| H | -2.15589178 | 7.07723649  | 0.76266218  |
| H | -0.41522282 | 7.35819925  | -1.02373964 |
| H | -4.34926701 | -0.93222392 | 0.35849761  |
| H | 0.34568473  | -0.17440803 | -4.45980530 |
| H | -3.74262930 | 5.64970772  | 1.98480200  |
| H | 0.95232244  | 6.40752361  | -2.83350091 |
| C | 3.03591757  | -5.12440975 | 8.70104057  |
| C | 3.57346294  | -2.48123267 | 9.59000593  |
| C | 4.34294562  | -4.58431427 | 8.57307721  |
| C | 1.99766221  | -4.34291669 | 9.27348661  |
| C | 4.61171831  | -3.26272573 | 9.01755989  |
| C | 2.26643489  | -3.02132815 | 9.71796929  |
| C | 2.76714489  | -6.44599829 | 8.25655789  |
| C | 5.38120099  | -5.36580732 | 8.00063117  |
| C | 0.69063415  | -4.88301218 | 9.40144997  |
| C | 3.84223562  | -1.15964413 | 10.03448861 |
| C | 5.91874636  | -2.72263024 | 8.88959653  |
| C | 1.22817952  | -2.23983509 | 10.29041533 |
| C | 5.11242831  | -6.68739586 | 7.55614849  |
| C | 0.42186147  | -6.20460072 | 8.95696729  |
| C | 6.18751904  | -1.40104170 | 9.33407921  |

|    |             |             |             |
|----|-------------|-------------|-------------|
| C  | 1.49695220  | -0.91824655 | 10.73489801 |
| C  | 3.80540025  | -7.22749140 | 7.68411183  |
| C  | 1.46011683  | -6.98609383 | 8.38452123  |
| C  | 5.14926368  | -0.61954859 | 9.90652527  |
| C  | 2.80398026  | -0.37815101 | 10.60693467 |
| C  | 6.68822882  | -4.82571182 | 7.87266788  |
| C  | -0.34762099 | -4.10151914 | 9.97389594  |
| C  | 6.95700150  | -3.50412328 | 8.31715056  |
| C  | -0.07884830 | -2.77993060 | 10.41837862 |
| H  | 3.59908883  | -8.24195016 | 7.34292444  |
| H  | 1.25380542  | -8.00055259 | 8.04333384  |
| H  | 5.35557510  | 0.39491017  | 10.24771266 |
| H  | 3.01029168  | 0.63630775  | 10.94812206 |
| H  | 7.48519957  | -5.42559033 | 7.43325504  |
| H  | 7.96028369  | -3.08954292 | 8.21892515  |
| H  | -1.35090318 | -4.51609950 | 10.07212135 |
| H  | -0.87581906 | -2.18005209 | 10.85779146 |
| H  | 5.90939883  | -7.28727441 | 7.11673570  |
| H  | 7.19080101  | -0.98646127 | 9.23585389  |
| H  | -0.58142050 | -6.61918115 | 9.05519262  |
| H  | 0.69998168  | -0.31836801 | 11.17431080 |
| Cs | 0.20465800  | 0.10074000  | 0.48149700  |

433

n = 12, Energy = -1170.40852896

|   |            |             |            |
|---|------------|-------------|------------|
| C | 1.16360537 | -1.69331329 | 5.29766690 |
| C | 0.23656738 | -2.82466706 | 2.86328018 |
| C | 2.02171111 | -1.74700738 | 4.16754675 |

|   |             |             |             |
|---|-------------|-------------|-------------|
| C | -0.15801937 | -2.20529608 | 5.21059369  |
| C | 1.55819212  | -2.31268426 | 2.95035339  |
| C | -0.62153836 | -2.77097297 | 3.99340033  |
| C | 1.62712436  | -1.12763640 | 6.51486027  |
| C | 3.34333585  | -1.23502458 | 4.25461997  |
| C | -1.01612511 | -2.15160199 | 6.34071384  |
| C | -0.22695162 | -3.39034394 | 1.64608682  |
| C | 2.41629786  | -2.36637835 | 1.82023324  |
| C | -1.94316310 | -3.28295576 | 3.90632712  |
| C | 3.80685485  | -0.66934769 | 5.47181333  |
| C | -0.55260612 | -1.58592511 | 7.55790720  |
| C | 1.95277887  | -2.93205524 | 0.60303988  |
| C | -2.40668210 | -3.84863265 | 2.68913376  |
| C | 2.94874912  | -0.61565358 | 6.60193353  |
| C | 0.76901864  | -1.07394229 | 7.64498047  |
| C | 0.63115411  | -3.44403806 | 0.51596662  |
| C | -1.54857637 | -3.90232676 | 1.55901356  |
| C | 4.20144138  | -1.28871872 | 3.12449992  |
| C | -2.33774964 | -2.66358474 | 6.25364053  |
| C | 3.73792239  | -1.85439560 | 1.90730655  |
| C | -2.80126863 | -3.22926163 | 5.03644717  |
| H | 3.30454890  | -0.18143684 | 7.53625797  |
| H | 1.12481841  | -0.63972554 | 8.57930490  |
| H | 0.27535433  | -3.87825480 | -0.41835782 |
| H | -1.90437615 | -4.33654351 | 0.62468912  |
| H | 5.21592807  | -0.89571781 | 3.19133779  |
| H | 4.39660927  | -1.89561148 | 1.03981989  |

|   |             |             |              |
|---|-------------|-------------|--------------|
| H | -2.99643652 | -2.62236886 | 7.12112719   |
| H | -3.81575533 | -3.62226254 | 4.96960929   |
| H | 4.82134134  | -0.27634681 | 5.53865136   |
| H | 2.61146551  | -2.97327119 | -0.26444673  |
| H | -1.21129276 | -1.54470916 | 8.42539382   |
| H | -3.42116860 | -4.24163354 | 2.62229573   |
| C | 4.42457156  | -6.13459355 | -9.61385082  |
| C | 5.35677441  | -3.64437784 | -10.61155973 |
| C | 3.56084663  | -5.30892787 | -10.38108970 |
| C | 5.75439792  | -5.71515137 | -9.34546638  |
| C | 4.02694805  | -4.06382002 | -10.87994416 |
| C | 6.22049934  | -4.47004351 | -9.84432084  |
| C | 3.95847014  | -7.37970141 | -9.11499636  |
| C | 2.23102028  | -5.72837006 | -10.64947414 |
| C | 6.61812285  | -6.54081705 | -8.57822750  |
| C | 5.82287583  | -2.39926998 | -11.11041418 |
| C | 3.16322312  | -3.23815434 | -11.64718305 |
| C | 7.55032569  | -4.05060133 | -9.57593641  |
| C | 1.76491886  | -6.97347791 | -10.15061968 |
| C | 6.15202143  | -7.78592490 | -8.07937304  |
| C | 3.62932454  | -1.99304648 | -12.14603750 |
| C | 8.01642711  | -2.80549347 | -10.07479086 |
| C | 2.62864377  | -7.79914364 | -9.38338077  |
| C | 4.82219506  | -8.20536714 | -8.34775745  |
| C | 4.95915092  | -1.57360425 | -11.87765309 |
| C | 7.15270220  | -1.97982775 | -10.84202977 |
| C | 1.36729556  | -4.90270442 | -11.41671292 |

|   |            |             |              |
|---|------------|-------------|--------------|
| C | 7.94794899 | -6.12137483 | -8.30984317  |
| C | 1.83339698 | -3.65759656 | -11.91556738 |
| C | 8.41405041 | -4.87626697 | -8.80869762  |
| H | 2.27086171 | -8.75489540 | -9.00045730  |
| H | 4.46441300 | -9.16111890 | -7.96483398  |
| H | 5.31693298 | -0.61785249 | -12.26057656 |
| H | 7.51048426 | -1.02407599 | -11.22495324 |
| H | 0.34651326 | -5.22467061 | -11.62272635 |
| H | 1.17039678 | -3.02381089 | -12.50450432 |
| H | 8.61094919 | -6.75516050 | -7.72090622  |
| H | 9.43483271 | -4.55430077 | -8.60268419  |
| H | 0.74413675 | -7.29544420 | -10.35663299 |
| H | 2.96632458 | -1.35926080 | -12.73497436 |
| H | 6.81502139 | -8.41971059 | -7.49043618  |
| H | 9.03720922 | -2.48352719 | -9.86877755  |
| C | 2.35115847 | -6.33135657 | 1.06355369   |
| C | 2.35532218 | -5.66654494 | 3.82464183   |
| C | 3.50471550 | -5.74851094 | 1.65176898   |
| C | 1.19968329 | -6.58179638 | 1.85588248   |
| C | 3.50679736 | -5.41610513 | 3.03231304   |
| C | 1.20176515 | -6.24939057 | 3.23642654   |
| C | 2.34907661 | -6.66376239 | -0.31699037  |
| C | 4.65619068 | -5.49807113 | 0.85944020   |
| C | 0.04612626 | -7.16464201 | 1.26766719   |
| C | 2.35740404 | -5.33413912 | 5.20518589   |
| C | 4.66035439 | -4.83325950 | 3.62052833   |
| C | 0.05028997 | -6.49983038 | 4.02875532   |

|   |             |             |             |
|---|-------------|-------------|-------------|
| C | 4.65410882  | -5.83047695 | -0.52110387 |
| C | 0.04404440  | -7.49704783 | -0.11287687 |
| C | 4.66243625  | -4.50085368 | 5.00107240  |
| C | 0.05237183  | -6.16742456 | 5.40929939  |
| C | 3.50055179  | -6.41332259 | -1.10931921 |
| C | 1.19551958  | -7.24660804 | -0.90520571 |
| C | 3.51096107  | -4.75129348 | 5.79340123  |
| C | 1.20592886  | -5.58457892 | 5.99751473  |
| C | 5.80974749  | -4.91522558 | 1.44765550  |
| C | -1.10534869 | -7.41508174 | 2.05999595  |
| C | 5.81182934  | -4.58281977 | 2.82819957  |
| C | -1.10326684 | -7.08267593 | 3.44054002  |
| H | 3.49895374  | -6.66847916 | -2.16903256 |
| H | 1.19392153  | -7.50176460 | -1.96491906 |
| H | 3.51255911  | -4.49613691 | 6.85311458  |
| H | 1.20752691  | -5.32942235 | 7.05722808  |
| H | 6.69362641  | -4.72298655 | 0.83945943  |
| H | 6.69730631  | -4.13542414 | 3.27971696  |
| H | -1.99082566 | -7.86247737 | 1.60847856  |
| H | -1.98714576 | -7.27491496 | 4.04873609  |
| H | 5.53798752  | -5.63823801 | -1.12929998 |
| H | 5.54791299  | -4.05345812 | 5.45258986  |
| H | -0.84143234 | -7.94444339 | -0.56439434 |
| H | -0.83150687 | -6.35966350 | 6.01749550  |
| C | 1.47079397  | 5.40466600  | 4.27121020  |
| C | -1.34950373 | 5.63133216  | 4.51645059  |
| C | 0.77206177  | 6.39991476  | 3.53796173  |

|   |             |            |            |
|---|-------------|------------|------------|
| C | 0.75937732  | 4.52275033 | 5.12707886 |
| C | -0.63808708 | 6.51324784 | 3.66058193 |
| C | -0.65077153 | 4.63608341 | 5.24969905 |
| C | 2.88094282  | 5.29133292 | 4.14859000 |
| C | 1.48347843  | 7.28183043 | 2.68209307 |
| C | 1.45810951  | 3.52750157 | 5.86032732 |
| C | -2.75965258 | 5.74466524 | 4.63907079 |
| C | -1.33681927 | 7.50849659 | 2.92733346 |
| C | -1.36218818 | 3.75416773 | 6.10556772 |
| C | 2.89362728  | 7.16849735 | 2.55947287 |
| C | 2.86825836  | 3.41416849 | 5.73770712 |
| C | -2.74696812 | 7.62182967 | 3.04995366 |
| C | -2.77233703 | 3.86750081 | 6.22818791 |
| C | 3.59235953  | 6.17324859 | 3.29272133 |
| C | 3.57967508  | 4.29608416 | 4.88183846 |
| C | -3.45838483 | 6.73991400 | 3.90582233 |
| C | -3.47106929 | 4.86274957 | 5.49493945 |
| C | 0.78474623  | 8.27707900 | 1.94884476 |
| C | 0.74669286  | 2.64558608 | 6.71619583 |
| C | -0.62540262 | 8.39041208 | 2.07146496 |
| C | -0.66345599 | 2.75891916 | 6.83881603 |
| H | 4.67479768  | 6.08625349 | 3.19859738 |
| H | 4.66211323  | 4.20908906 | 4.78771451 |
| H | -4.54082298 | 6.82690911 | 3.99994628 |
| H | -4.55350744 | 4.94974468 | 5.58906340 |
| H | 1.33083369  | 8.95404251 | 1.29187509 |
| H | -1.16175342 | 9.15437071 | 1.50861925 |

|   |             |             |             |
|---|-------------|-------------|-------------|
| H | 1.28304367  | 1.88162745  | 7.27904154  |
| H | -1.20954345 | 2.08195565  | 7.49578570  |
| H | 3.43971480  | 7.84546067  | 1.90250335  |
| H | -3.28331899 | 8.38578812  | 2.48710811  |
| H | 3.40460923  | 2.65021004  | 6.30055268  |
| H | -3.31842456 | 3.19053749  | 6.88515743  |
| C | 3.65818150  | -4.28276016 | -6.64686567 |
| C | 2.84821004  | -6.79246015 | -5.59284874 |
| C | 4.57352218  | -5.06584015 | -5.89497656 |
| C | 2.33785509  | -4.75453016 | -6.87174632 |
| C | 4.16853645  | -6.32069014 | -5.36796809 |
| C | 1.93286936  | -6.00938016 | -6.34473786 |
| C | 4.06316723  | -3.02791016 | -7.17387414 |
| C | 5.89384859  | -4.59407014 | -5.67009590 |
| C | 1.42251441  | -3.97145018 | -7.62363544 |
| C | 2.44322431  | -8.04731015 | -5.06584027 |
| C | 5.08387713  | -7.10377013 | -4.61607897 |
| C | 0.61254295  | -6.48115017 | -6.56961851 |
| C | 6.29883432  | -3.33922014 | -6.19710437 |
| C | 1.82750014  | -2.71660018 | -8.15064391 |
| C | 4.67889140  | -8.35862013 | -4.08907051 |
| C | 0.20755722  | -7.73600016 | -6.04261004 |
| C | 5.38349366  | -2.55614010 | -6.94899351 |
| C | 3.14782656  | -2.24483012 | -7.92576328 |
| C | 3.35856497  | -8.83039019 | -4.31395113 |
| C | 1.12289788  | -8.51908021 | -5.29072090 |
| C | 6.80918905  | -5.37715010 | -4.91820688 |



|   |             |             |             |
|---|-------------|-------------|-------------|
| C | 0.10218821  | -4.44322021 | -7.84851600 |
| C | 6.40420332  | -6.63200010 | -4.39119841 |
| C | -0.30279752 | -5.69807021 | -7.32150753 |
| H | 5.69436297  | -1.59291022 | -7.35352816 |
| H | 3.45869588  | -1.28160024 | -8.33029793 |
| H | 3.04769566  | -9.79362007 | -3.90941649 |
| H | 0.81202857  | -9.48231009 | -4.88618626 |
| H | 7.82267914  | -5.01501677 | -4.74558720 |
| H | 7.10682406  | -7.23309675 | -3.81404404 |
| H | -0.60043253 | -3.84212356 | -8.42567037 |
| H | -1.31628760 | -6.06020354 | -7.49412721 |
| H | 7.31232421  | -2.97708673 | -6.02448481 |
| H | 5.38151191  | -8.95971680 | -3.51191621 |
| H | 1.12487963  | -2.11550350 | -8.72779821 |
| H | -0.80593267 | -8.09813358 | -6.21522961 |
| C | -3.58015513 | 2.72782114  | -4.59026925 |
| C | -3.59187395 | -0.08843931 | -4.95651955 |
| C | -4.64769668 | 1.94873151  | -4.07087106 |
| C | -2.51847300 | 2.09878054  | -5.29279259 |
| C | -4.65355609 | 0.54060129  | -4.25399622 |
| C | -2.52433241 | 0.69065032  | -5.47591774 |
| C | -3.57429573 | 4.13595136  | -4.40714410 |
| C | -5.70937882 | 2.57777211  | -3.36834772 |
| C | -1.45093145 | 2.87787017  | -5.81219078 |
| C | -3.59773336 | -1.49656953 | -5.13964471 |
| C | -5.72109764 | -0.23848834 | -3.73459803 |
| C | -1.46265027 | 0.06160972  | -6.17844108 |

|   |             |             |             |
|---|-------------|-------------|-------------|
| C | -5.70351941 | 3.98590233  | -3.18522257 |
| C | -1.44507204 | 4.28600039  | -5.62906562 |
| C | -5.72695705 | -1.64661856 | -3.91772318 |
| C | -1.46850968 | -1.34652050 | -6.36156623 |
| C | -4.63597786 | 4.76499202  | -3.70462075 |
| C | -2.50675418 | 4.91504105  | -4.92654228 |
| C | -4.66527491 | -2.27565921 | -4.62024653 |
| C | -2.53605122 | -2.12561018 | -5.84216805 |
| C | -6.77692016 | 1.79868250  | -2.84894966 |
| C | -0.38924952 | 2.24882956  | -6.51471400 |
| C | -6.78277957 | 0.39055228  | -3.03207481 |
| C | -0.39510893 | 0.84069934  | -6.69783915 |
| H | -4.63148015 | 5.84588066  | -3.56405286 |
| H | -2.50225646 | 5.99592969  | -4.78597438 |
| H | -4.66977262 | -3.35654785 | -4.76081442 |
| H | -2.54054894 | -3.20649882 | -5.98273595 |
| H | -7.59187343 | 2.28153763  | -2.30968873 |
| H | -7.60223056 | -0.20748135 | -2.63338179 |
| H | 0.43020147  | 2.84686318  | -6.91340701 |
| H | 0.41984435  | 0.35784420  | -7.23710007 |
| H | -6.51847248 | 4.46875754  | -2.64596176 |
| H | -6.54640783 | -2.24465223 | -3.51903029 |
| H | -0.62562126 | 4.88403406  | -6.02775851 |
| H | -0.65355661 | -1.82937571 | -6.90082705 |
| C | -3.38431946 | 4.49893000  | 0.95890223  |
| C | -1.88699364 | 2.63325087  | 2.48954141  |
| C | -4.05227428 | 3.58823133  | 1.81963701  |

|   |             |            |             |
|---|-------------|------------|-------------|
| C | -1.96770173 | 4.47678910 | 0.86348704  |
| C | -3.30361138 | 2.65539177 | 2.58495660  |
| C | -1.21903882 | 3.54394954 | 1.62880663  |
| C | -4.13298237 | 5.43176957 | 0.19358264  |
| C | -5.46889202 | 3.61037223 | 1.91505221  |
| C | -1.29974691 | 5.38748777 | 0.00275225  |
| C | -1.13833073 | 1.70041131 | 3.25486100  |
| C | -3.97156620 | 1.74469310 | 3.44569139  |
| C | 0.19757891  | 3.52180864 | 1.53339143  |
| C | -6.21755492 | 4.54321179 | 1.14973262  |
| C | -2.04840981 | 6.32032734 | -0.76256734 |
| C | -3.22290329 | 0.81185354 | 4.21101098  |
| C | 0.94624182  | 2.58896908 | 2.29871102  |
| C | -5.54960013 | 5.45391050 | 0.28899780  |
| C | -3.46502758 | 6.34246827 | -0.66715218 |
| C | -1.80628553 | 0.78971260 | 4.11559582  |
| C | 0.27828703  | 1.67827037 | 3.15944584  |
| C | -6.13684664 | 2.69967365 | 2.77578690  |
| C | 0.11687062  | 5.36534679 | -0.09266285 |
| C | -5.38818373 | 1.76683409 | 3.54110649  |
| C | 0.86553353  | 4.43250723 | 0.67265674  |
| H | -6.12427797 | 6.16996337 | -0.29846580 |
| H | -4.03970542 | 7.05852114 | -1.25461578 |
| H | -1.23160769 | 0.07365973 | 4.70305942  |
| H | 0.85296487  | 0.96221751 | 3.74690944  |
| H | -7.22425049 | 2.71666911 | 2.84902816  |
| H | -5.90090968 | 1.06777660 | 4.20181141  |

|   |             |             |             |
|---|-------------|-------------|-------------|
| H | 0.62959657  | 6.06440427  | -0.75336777 |
| H | 1.95293738  | 4.41551176  | 0.59941548  |
| H | -7.30495860 | 4.56020738  | 1.22297375  |
| H | -3.73562901 | 0.11279610  | 4.87171584  |
| H | -1.53568410 | 7.01938477  | -1.42327220 |
| H | 2.03364550  | 2.57197349  | 2.22546989  |
| C | 6.75681937  | -1.37541290 | -0.66681299 |
| C | 7.02506038  | 0.87478774  | 1.04498236  |
| C | 7.94026218  | -1.20276134 | 0.09872906  |
| C | 5.70749707  | -0.42296414 | -0.57645736 |
| C | 8.07438268  | -0.07766102 | 0.95462673  |
| C | 5.84161757  | 0.70213618  | 0.27944031  |
| C | 6.62269886  | -2.50051323 | -1.52271066 |
| C | 8.98958448  | -2.15521010 | 0.00837344  |
| C | 4.52405426  | -0.59561571 | -1.34199941 |
| C | 7.15918089  | 1.99988807  | 1.90088003  |
| C | 9.25782549  | 0.09499055  | 1.72016878  |
| C | 4.79229527  | 1.65458494  | 0.36979593  |
| C | 8.85546398  | -3.28031042 | -0.84752424 |
| C | 4.38993375  | -1.72071603 | -2.19789709 |
| C | 9.39194600  | 1.22009087  | 2.57606646  |
| C | 4.92641577  | 2.77968526  | 1.22569361  |
| C | 7.67202116  | -3.45296203 | -1.61306632 |
| C | 5.43925605  | -2.67316484 | -2.28825275 |
| C | 8.34262370  | 2.17253968  | 2.66642212  |
| C | 6.10985859  | 2.95233687  | 1.99123570  |
| C | 10.17302708 | -1.98255846 | 0.77391542  |

|   |             |             |             |
|---|-------------|-------------|-------------|
| C | 3.47473217  | 0.35683298  | -1.25164372 |
| C | 10.30714758 | -0.85745814 | 1.62981309  |
| C | 3.60885267  | 1.48193330  | -0.39574605 |
| H | 7.56906951  | -4.31659534 | -2.27005817 |
| H | 5.33630440  | -3.53679814 | -2.94524459 |
| H | 8.44557535  | 3.03617298  | 3.32341397  |
| H | 6.21281024  | 3.81597018  | 2.64822754  |
| H | 10.97849287 | -2.71366355 | 0.70455794  |
| H | 11.21556504 | -0.72492983 | 2.21744753  |
| H | 2.56631471  | 0.22430467  | -1.83927816 |
| H | 2.80338688  | 2.21303839  | -0.32638857 |
| H | 9.66092955  | -4.01141549 | -0.91688182 |
| H | 10.30036325 | 1.35261930  | 3.16370087  |
| H | 3.48151650  | -1.85324446 | -2.78553150 |
| H | 4.12095020  | 3.51079033  | 1.29505119  |
| C | 5.89362133  | 4.52004616  | -1.71927966 |
| C | 5.67062801  | 2.23037757  | -3.38459981 |
| C | 4.70985122  | 4.30277642  | -2.47285928 |
| C | 6.96589478  | 3.59248161  | -1.79836011 |
| C | 4.59835456  | 3.15794212  | -3.30551936 |
| C | 6.85439813  | 2.44764732  | -2.63102019 |
| C | 6.00511798  | 5.66488046  | -0.88661958 |
| C | 3.63757776  | 5.23034097  | -2.39377883 |
| C | 8.14966490  | 3.80975136  | -1.04478048 |
| C | 5.55913136  | 1.08554327  | -4.21725989 |
| C | 3.41458445  | 2.94067237  | -4.05909899 |
| C | 7.92667158  | 1.52008277  | -2.71010064 |

|   |             |             |             |
|---|-------------|-------------|-------------|
| C | 3.74907442  | 6.37517526  | -1.56111875 |
| C | 8.26116155  | 4.95458566  | -0.21212040 |
| C | 3.30308779  | 1.79583808  | -4.89175907 |
| C | 7.81517493  | 0.37524847  | -3.54276072 |
| C | 4.93284453  | 6.59244506  | -0.80753909 |
| C | 7.18888810  | 5.88215026  | -0.13303992 |
| C | 4.37536124  | 0.86827348  | -4.97083955 |
| C | 6.63140481  | 0.15797868  | -4.29634038 |
| C | 2.45380787  | 5.01307115  | -3.14735839 |
| C | 9.22193813  | 2.88218688  | -1.12386100 |
| C | 2.34231121  | 3.86823685  | -3.98001847 |
| C | 9.11044148  | 1.73735258  | -1.95652108 |
| H | 5.01842999  | 7.47122627  | -0.16838456 |
| H | 7.27447356  | 6.76093147  | 0.50611462  |
| H | 4.28977578  | -0.01050774 | -5.60999409 |
| H | 6.54581935  | -0.72080254 | -4.93549491 |
| H | 1.63072463  | 5.72507498  | -3.08665580 |
| H | 1.43364251  | 3.70145937  | -4.55847048 |
| H | 10.13060683 | 3.04896436  | -0.54540898 |
| H | 9.93352471  | 1.02534875  | -2.01722367 |
| H | 2.92599141  | 7.08717907  | -1.50041606 |
| H | 2.39441931  | 1.62906048  | -5.47021105 |
| H | 9.16983004  | 5.12136326  | 0.36633158  |
| H | 8.63825793  | -0.33675534 | -3.60346341 |
| C | 4.37926849  | 4.06652620  | -7.38886271 |
| C | 6.94042074  | 4.07434566  | -6.16165551 |
| C | 5.29234468  | 3.00951044  | -7.64461576 |

|   |             |            |             |
|---|-------------|------------|-------------|
| C | 4.74676843  | 5.12745169 | -6.51950607 |
| C | 6.57292081  | 3.01342016 | -7.03101216 |
| C | 6.02734455  | 5.13136142 | -5.90590247 |
| C | 3.09869237  | 4.06261647 | -8.00246631 |
| C | 4.92484475  | 1.94858494 | -8.51397240 |
| C | 3.83369224  | 6.18446746 | -6.26375303 |
| C | 8.22099687  | 4.07825538 | -5.54805191 |
| C | 7.48599700  | 1.95640440 | -7.28676520 |
| C | 6.39484449  | 6.19228691 | -5.03654583 |
| C | 3.64426862  | 1.94467522 | -9.12757600 |
| C | 2.55311611  | 6.18055773 | -6.87735663 |
| C | 8.76657312  | 1.96031413 | -6.67316160 |
| C | 7.67542061  | 6.19619664 | -4.42294223 |
| C | 2.73119238  | 3.00169098 | -8.87182298 |
| C | 2.18561612  | 5.11963224 | -7.74671330 |
| C | 9.13407311  | 3.02123962 | -5.80380493 |
| C | 8.58849686  | 5.13918088 | -4.67869524 |
| C | 5.83792088  | 0.89156938 | -8.76972533 |
| C | 4.20119222  | 7.24539275 | -5.39439649 |
| C | 7.11849701  | 0.89547911 | -8.15612173 |
| C | 5.48176835  | 7.24930247 | -4.78079289 |
| H | 1.74821498  | 2.99868985 | -9.34282854 |
| H | 1.20263872  | 5.11663111 | -8.21771886 |
| H | 10.11705051 | 3.02424075 | -5.33279937 |
| H | 9.57147426  | 5.14218200 | -4.20768969 |
| H | 5.55582585  | 0.07719692 | -9.43704845 |
| H | 7.81937949  | 0.08410777 | -8.35243924 |

|   |             |             |             |
|---|-------------|-------------|-------------|
| H | 3.50030974  | 8.05676409  | -5.19807899 |
| H | 5.76386338  | 8.06367494  | -4.11346978 |
| H | 3.36217348  | 1.13030295  | -9.79489903 |
| H | 9.46745560  | 1.14894299  | -6.86947897 |
| H | 1.85223363  | 6.99192887  | -6.68103926 |
| H | 7.95751575  | 7.01056890  | -3.75561919 |
| C | -1.17311228 | -2.65198977 | -2.64413486 |
| C | -3.24050188 | -1.31328410 | -1.23014516 |
| C | -2.23958670 | -3.39571783 | -2.07325749 |
| C | -1.14033266 | -1.23890888 | -2.50801738 |
| C | -3.27328150 | -2.72636499 | -1.36626264 |
| C | -2.17402746 | -0.56955604 | -1.80102253 |
| C | -0.13941748 | -3.32134261 | -3.35112971 |
| C | -2.27236632 | -4.80879872 | -2.20937497 |
| C | -0.07385824 | -0.49518083 | -3.07889475 |
| C | -4.27419668 | -0.64393126 | -0.52315031 |
| C | -4.33975592 | -3.47009304 | -0.79538527 |
| C | -2.14124784 | 0.84352485  | -1.66490505 |
| C | -1.23867151 | -5.47815156 | -2.91636982 |
| C | 0.95983656  | -1.16453367 | -3.78588960 |
| C | -5.37345072 | -2.80074020 | -0.08839042 |
| C | -3.17494264 | 1.51287768  | -0.95791020 |
| C | -0.17219705 | -4.73442353 | -3.48724721 |
| C | 0.92705699  | -2.57761459 | -3.92200710 |
| C | -5.34067114 | -1.38765928 | 0.04772708  |
| C | -4.24141710 | 0.76914966  | -0.38703281 |
| C | -3.33884063 | -5.55252656 | -1.63849764 |



|   |             |             |              |
|---|-------------|-------------|--------------|
| C | -0.04107872 | 0.91789985  | -2.94277723  |
| C | -4.37253543 | -4.88317372 | -0.93150279  |
| C | -1.07477352 | 1.58725269  | -2.23578238  |
| H | 0.62127286  | -5.24822252 | -4.02994042  |
| H | 1.72052690  | -3.09141357 | -4.46470031  |
| H | -6.13414106 | -0.87386030 | 0.59042029   |
| H | -5.03488702 | 1.28294864  | 0.15566040   |
| H | -3.36400247 | -6.63721551 | -1.74298218  |
| H | -5.19116727 | -5.45406364 | -0.49329407  |
| H | 0.77755312  | 1.48878976  | -3.38098595  |
| H | -1.04961169 | 2.67194164  | -2.13129784  |
| H | -1.26383320 | -6.56284033 | -3.02085443  |
| H | -6.19208250 | -3.37162988 | 0.34981828   |
| H | 1.77846834  | -0.59364399 | -4.22409830  |
| H | -3.14978095 | 2.59756646  | -0.85342559  |
| C | -4.50185078 | 1.68597589  | -8.35235006  |
| C | -2.56508688 | 0.10753213  | -9.70255760  |
| C | -3.37426762 | 2.30583376  | -8.95296017  |
| C | -4.66105200 | 0.27689614  | -8.42684372  |
| C | -2.40588567 | 1.51661188  | -9.62806394  |
| C | -3.69267005 | -0.51232574 | -9.10194749  |
| C | -5.47023273 | 2.47519777  | -7.67724629  |
| C | -3.21506640 | 3.71491351  | -8.87846651  |
| C | -5.78863516 | -0.34296173 | -7.82623361  |
| C | -1.59670493 | -0.68168975 | -10.37766137 |
| C | -1.27830250 | 2.13646975  | -10.22867405 |
| C | -3.85187126 | -1.92140549 | -9.17644115  |

|    |             |             |              |
|----|-------------|-------------|--------------|
| C  | -4.18344835 | 4.50413539  | -8.20336274  |
| C  | -6.75701711 | 0.44626015  | -7.15112984  |
| C  | -0.30992055 | 1.34724787  | -10.90377782 |
| C  | -2.88348931 | -2.71062737 | -9.85154492  |
| C  | -5.31103156 | 3.88427755  | -7.60275260  |
| C  | -6.59781594 | 1.85533993  | -7.07663616  |
| C  | -0.46912173 | -0.06183192 | -10.97827151 |
| C  | -1.75590611 | -2.09076954 | -10.45215506 |
| C  | -2.08748336 | 4.33477118  | -9.47907657  |
| C  | -5.94783625 | -1.75204129 | -7.90072732  |
| C  | -1.11910141 | 3.54554930  | -10.15418034 |
| C  | -4.97945430 | -2.54126317 | -8.57583109  |
| H  | -6.05436696 | 4.49008869  | -7.08453917  |
| H  | -7.34115134 | 2.46115107  | -6.55842272  |
| H  | 0.27421368  | -0.66764305 | -11.49648494 |
| H  | -1.01257070 | -2.69658067 | -10.97036849 |
| H  | -1.96527958 | 5.41638884  | -9.42189482  |
| H  | -0.25356215 | 4.02135576  | -10.61521208 |
| H  | -6.81337552 | -2.22784774 | -7.43969559  |
| H  | -5.10165808 | -3.62288082 | -8.63301284  |
| H  | -4.06124474 | 5.58575288  | -8.14618091  |
| H  | 0.55561863  | 1.82305409  | -11.36480953 |
| H  | -7.62255629 | -0.02954607 | -6.69009813  |
| H  | -3.00569292 | -3.79224486 | -9.90872675  |
| Cs | 0.20465800  | -0.10074000 | 0.48149700   |

469

n = 13, Energy = -1263.28381269

|   |             |            |             |
|---|-------------|------------|-------------|
| C | -1.55050056 | 2.40610148 | 2.65533884  |
| C | -4.28733786 | 2.19129438 | 1.92789192  |
| C | -1.97382948 | 2.80233841 | 1.35911780  |
| C | -2.49559029 | 1.90246101 | 3.58783643  |
| C | -3.34224812 | 2.69493485 | 0.99539433  |
| C | -3.86400894 | 1.79505745 | 3.22411297  |
| C | -0.18208191 | 2.51350504 | 3.01906231  |
| C | -1.02873975 | 3.30597888 | 0.42662021  |
| C | -2.07226137 | 1.50622408 | 4.88405748  |
| C | -5.65575650 | 2.08389082 | 1.56416846  |
| C | -3.76557704 | 3.09117178 | -0.30082671 |
| C | -4.80909867 | 1.29141698 | 4.15661055  |
| C | 0.33967890  | 3.41338244 | 0.79034367  |
| C | -0.70384273 | 1.61362764 | 5.24778094  |
| C | -5.13399569 | 2.98376822 | -0.66455018 |
| C | -6.17751732 | 1.18401342 | 3.79288709  |
| C | 0.76300788  | 3.01714552 | 2.08656474  |
| C | 0.24124706  | 2.11726812 | 4.31528337  |
| C | -6.07908548 | 2.48012774 | 0.26794739  |
| C | -6.60084629 | 1.58025034 | 2.49666603  |
| C | -1.45206871 | 3.70221572 | -0.86960062 |
| C | -3.01735105 | 1.00258369 | 5.81655485  |
| C | -2.82048736 | 3.59481216 | -1.23332408 |
| C | -4.38576970 | 0.89518014 | 5.45283138  |
| H | 1.81341369  | 3.09958909 | 2.36576090  |
| H | 1.29165288  | 2.19971169 | 4.59447954  |
| H | -7.12949129 | 2.39768417 | -0.01124877 |

|   |             |            |             |
|---|-------------|------------|-------------|
| H | -7.65125211 | 1.49780677 | 2.21746986  |
| H | -0.72661246 | 4.08881302 | -1.58539110 |
| H | -3.14543703 | 3.89896589 | -2.22831076 |
| H | -2.69240138 | 0.69842997 | 6.81154152  |
| H | -5.11122596 | 0.50858284 | 6.16862186  |
| H | 1.06513516  | 3.79997966 | 0.07455343  |
| H | -5.45894547 | 3.28792186 | -1.65953665 |
| H | -0.37889294 | 1.30947400 | 6.24276741  |
| H | -6.90297358 | 0.79741620 | 4.50867734  |
| C | 6.90989134  | 6.71917109 | 0.74756063  |
| C | 7.23917303  | 5.16932809 | -1.60937801 |
| C | 7.63669974  | 5.50020182 | 0.79513752  |
| C | 6.34772379  | 7.16321885 | -0.47848557 |
| C | 7.80134059  | 4.72528033 | -0.38333180 |
| C | 6.51236463  | 6.38829735 | -1.65695489 |
| C | 6.74525049  | 7.49409259 | 1.92602995  |
| C | 8.19886730  | 5.05615406 | 2.02118372  |
| C | 5.62091538  | 8.38218811 | -0.52606246 |
| C | 7.40381388  | 4.39440659 | -2.78784733 |
| C | 8.52814899  | 3.50631106 | -0.33575492 |
| C | 5.95019708  | 6.83234512 | -2.88300110 |
| C | 8.03422645  | 5.83107556 | 3.19965305  |
| C | 5.45627454  | 9.15710961 | 0.65240686  |
| C | 8.69278984  | 2.73138956 | -1.51422424 |
| C | 6.11483792  | 6.05742362 | -4.06147042 |
| C | 7.30741804  | 7.05004485 | 3.15207621  |
| C | 6.01844209  | 8.71306188 | 1.87845312  |

|   |            |             |             |
|---|------------|-------------|-------------|
| C | 8.13062229 | 3.17543730  | -2.74027049 |
| C | 6.84164633 | 4.83845432  | -4.01389359 |
| C | 8.92567558 | 3.83718496  | 2.06876049  |
| C | 5.05874795 | 8.82623572  | -1.75210854 |
| C | 9.09031642 | 3.06226346  | 0.89029116  |
| C | 5.22338880 | 8.05131422  | -2.93057786 |
| H | 7.18103881 | 7.64487893  | 4.05667586  |
| H | 5.89206285 | 9.30789596  | 2.78305277  |
| H | 8.25700152 | 2.58060322  | -3.64487014 |
| H | 6.96802557 | 4.24362024  | -4.91849323 |
| H | 9.35719860 | 3.49633135  | 3.00988054  |
| H | 9.64821870 | 2.12657570  | 0.92681147  |
| H | 4.50084568 | 9.76192347  | -1.78862885 |
| H | 4.79186577 | 8.39216783  | -3.87169791 |
| H | 8.46574935 | 5.49022214  | 4.14077302  |
| H | 9.25069200 | 1.79570194  | -1.47770410 |
| H | 4.89837238 | 10.09279724 | 0.61588673  |
| H | 5.68331503 | 6.39827704  | -5.00259040 |
| C | 2.44437615 | 1.37320179  | -6.13535848 |
| C | 0.35335760 | -0.23830224 | -7.18239988 |
| C | 2.38046165 | -0.00726889 | -5.80883787 |
| C | 1.46278138 | 1.94792046  | -6.98539979 |
| C | 1.33495237 | -0.81302091 | -6.33235857 |
| C | 0.41727210 | 1.14216844  | -7.50892049 |
| C | 3.48988543 | 2.17895380  | -5.61183778 |
| C | 3.36205642 | -0.58198756 | -4.95879656 |
| C | 1.52669588 | 3.32839114  | -7.31192040 |

|   |             |             |             |
|---|-------------|-------------|-------------|
| C | -0.69215168 | -1.04405425 | -7.70592058 |
| C | 1.27103787  | -2.19349159 | -6.00583796 |
| C | -0.56432267 | 1.71688711  | -8.35896180 |
| C | 4.40756570  | 0.22376445  | -4.43527586 |
| C | 2.57220516  | 4.13414315  | -6.78839970 |
| C | 0.22552859  | -2.99924360 | -6.52935866 |
| C | -1.60983195 | 0.91113510  | -8.88248250 |
| C | 4.47148024  | 1.60423516  | -4.76179645 |
| C | 3.55379998  | 3.55942452  | -5.93835837 |
| C | -0.75606623 | -2.42452497 | -7.37939999 |
| C | -1.67374650 | -0.46933562 | -8.55596191 |
| C | 3.29814183  | -1.96245806 | -4.63227606 |
| C | 0.54510120  | 3.90310962  | -8.16196160 |
| C | 2.25263255  | -2.76821007 | -5.15579676 |
| C | -0.50040808 | 3.09735760  | -8.68548230 |
| H | 5.27401902  | 2.22273492  | -4.35993903 |
| H | 4.35633875  | 4.17792427  | -5.53650095 |
| H | -1.55860500 | -3.04302472 | -7.78125741 |
| H | -2.47628527 | -1.08783537 | -8.95781933 |
| H | 4.05161956  | -2.40361540 | -3.97977950 |
| H | 2.20357143  | -3.82786724 | -4.90515767 |
| H | 0.59416232  | 4.96276679  | -8.41260069 |
| H | -1.25388582 | 3.53851495  | -9.33797885 |
| H | 5.16104339  | -0.21739267 | -3.78277939 |
| H | 0.17646733  | -4.05890061 | -6.27871970 |
| H | 2.62126641  | 5.19380016  | -7.03903866 |
| H | -2.36330964 | 1.35229222  | -9.53497896 |

|   |             |            |             |
|---|-------------|------------|-------------|
| C | -0.01548781 | 5.92699179 | 3.79221511  |
| C | -1.79754937 | 6.45179897 | 1.64409184  |
| C | -1.41152372 | 5.73219561 | 3.96408215  |
| C | 0.48951731  | 6.38419157 | 2.54628643  |
| C | -2.30255450 | 5.99459920 | 2.89002052  |
| C | -0.40151347 | 6.64659516 | 1.47222480  |
| C | 0.87554296  | 5.66458820 | 4.86627674  |
| C | -1.91652884 | 5.27499583 | 5.21001083  |
| C | 1.88555321  | 6.57898775 | 2.37441938  |
| C | -2.68858015 | 6.71420256 | 0.57003021  |
| C | -3.69859040 | 5.79980301 | 3.06188757  |
| C | 0.10349165  | 7.10379493 | 0.22629612  |
| C | -1.02549806 | 5.01259224 | 6.28407246  |
| C | 2.77658399  | 6.31658416 | 3.44848101  |
| C | -4.58962118 | 6.06220660 | 1.98782594  |
| C | -0.78753912 | 7.36619852 | -0.84776551 |
| C | 0.37053788  | 5.20738842 | 6.11220546  |
| C | 2.27157890  | 5.85938438 | 4.69440973  |
| C | -4.08461609 | 6.51940639 | 0.74189722  |
| C | -2.18357506 | 7.17140235 | -0.67589851 |
| C | -3.31256456 | 5.08019971 | 5.38187774  |
| C | 2.39055815  | 7.03618747 | 1.12849084  |
| C | -4.20359534 | 5.34260330 | 4.30781611  |
| C | 1.49952737  | 7.29859105 | 0.05442921  |
| H | 1.05449809  | 5.00596595 | 6.93666118  |
| H | 2.95553912  | 5.65796191 | 5.51886545  |
| H | -4.76857630 | 6.72082885 | -0.08255850 |

|   |             |             |              |
|---|-------------|-------------|--------------|
| H | -2.86753528 | 7.37282481  | -1.50035423  |
| H | -3.70020939 | 4.72925056  | 6.33825969   |
| H | -5.27520046 | 5.19307663  | 4.43974225   |
| H | 3.46216327  | 7.18571413  | 0.99656470   |
| H | 1.88717220  | 7.64954021  | -0.90195274  |
| H | -1.41314267 | 4.66164314  | 7.24045432   |
| H | -5.66122615 | 5.91268001  | 2.11975190   |
| H | 3.84818896  | 6.46611076  | 3.31655505   |
| H | -0.39989451 | 7.71714763  | -1.80414737  |
| C | 8.42533562  | -0.30511307 | -10.31462420 |
| C | 10.52882051 | -1.09161229 | -8.57612777  |
| C | 8.50738752  | -1.64846923 | -9.86178669  |
| C | 9.39502616  | 0.64499347  | -9.89821349  |
| C | 9.55912996  | -2.04171884 | -8.99253848  |
| C | 10.44676860 | 0.25174386  | -9.02896528  |
| C | 7.37359317  | 0.08813653  | -11.18387241 |
| C | 7.53769697  | -2.59857577 | -10.27819740 |
| C | 9.31297426  | 1.98834963  | -10.35105099 |
| C | 11.58056295 | -1.48486190 | -7.70687956  |
| C | 9.64118186  | -3.38507499 | -8.53970098  |
| C | 11.41645915 | 1.20185041  | -8.61255457  |
| C | 6.48595453  | -2.20532617 | -11.14744561 |
| C | 8.26123181  | 2.38159923  | -11.22029920 |
| C | 10.69292431 | -3.77832460 | -7.67045277  |
| C | 12.46820159 | 0.80860080  | -7.74330636  |
| C | 6.40390258  | -0.86196999 | -11.60028315 |
| C | 7.29154123  | 1.43149271  | -11.63670995 |



|   |             |             |              |
|---|-------------|-------------|--------------|
| C | 11.66261490 | -2.82821807 | -7.25404202  |
| C | 12.55025354 | -0.53475537 | -7.29046882  |
| C | 7.61974896  | -3.94193171 | -9.82535990  |
| C | 10.28266472 | 2.93845595  | -9.93464028  |
| C | 8.67149141  | -4.33518132 | -8.95611169  |
| C | 11.33440716 | 2.54520634  | -9.06539207  |
| H | 5.59657920  | -0.56010939 | -12.26752295 |
| H | 6.48421784  | 1.73335331  | -12.30394974 |
| H | 12.46993828 | -3.13007867 | -6.58680223  |
| H | 13.35757692 | -0.83661597 | -6.62322902  |
| H | 6.87540898  | -4.67123892 | -10.14499913 |
| H | 8.73447490  | -5.36634917 | -8.60851105  |
| H | 10.21968122 | 3.96962380  | -10.28224092 |
| H | 12.07874714 | 3.27451356  | -8.74575284  |
| H | 5.74161459  | -2.93463314 | -11.46708488 |
| H | 10.75590793 | -4.80949225 | -7.32285209  |
| H | 8.19824819  | 3.41276688  | -11.56789988 |
| H | 13.21254153 | 1.53790778  | -7.42366709  |
| C | 5.51533322  | -3.63612857 | 2.60047184   |
| C | 5.81846810  | -3.58279661 | -0.22280011  |
| C | 6.11306680  | -2.51196907 | 1.97167929   |
| C | 5.06916708  | -4.73362208 | 1.81762841   |
| C | 6.26463424  | -2.48530309 | 0.56004332   |
| C | 5.22073452  | -4.70695610 | 0.40599244   |
| C | 5.36376577  | -3.66279455 | 4.01210781   |
| C | 6.55923294  | -1.41447555 | 2.75452272   |
| C | 4.47143350  | -5.85778158 | 2.44642095   |

|   |            |             |             |
|---|------------|-------------|-------------|
| C | 5.97003555 | -3.55613063 | -1.63443608 |
| C | 6.86236782 | -1.36114359 | -0.06874922 |
| C | 4.77456838 | -5.80444962 | -0.37685099 |
| C | 6.40766549 | -1.44114153 | 4.16615869  |
| C | 4.31986605 | -5.88444756 | 3.85805693  |
| C | 7.01393527 | -1.33447761 | -1.48038519 |
| C | 4.92613583 | -5.77778364 | -1.78848696 |
| C | 5.80993191 | -2.56530103 | 4.79495129  |
| C | 4.76603219 | -4.78695405 | 4.64090041  |
| C | 6.56776913 | -2.43197113 | -2.26322868 |
| C | 5.52386941 | -4.65362414 | -2.41727956 |
| C | 7.15696642 | -0.29031627 | 2.12573016  |
| C | 4.02526746 | -6.95527489 | 1.66357754  |
| C | 7.30853386 | -0.26365029 | 0.71409419  |
| C | 4.17683490 | -6.92860891 | 0.25194157  |
| H | 5.69358789 | -2.58576998 | 5.87853096  |
| H | 4.64968817 | -4.80742300 | 5.72448008  |
| H | 6.68411315 | -2.41150217 | -3.34680835 |
| H | 5.64021343 | -4.63315519 | -3.50085923 |
| H | 7.49944609 | 0.55212603  | 2.72664522  |
| H | 7.76735757 | 0.59926097  | 0.23142946  |
| H | 3.56644375 | -7.81818614 | 2.14624227  |
| H | 3.83435523 | -7.77105120 | -0.34897349 |
| H | 6.75014506 | -0.59869945 | 4.76707380  |
| H | 7.47275888 | -0.47156657 | -1.96304999 |
| H | 3.86104244 | -6.74735860 | 4.34072173  |
| H | 4.58365626 | -6.62022572 | -2.38940207 |

|   |             |             |             |
|---|-------------|-------------|-------------|
| C | -0.63711306 | 5.62286014  | -5.00712421 |
| C | -0.80003408 | 2.84910297  | -4.41947855 |
| C | 0.34909359  | 5.01137677  | -4.18865942 |
| C | -1.70478021 | 4.84746493  | -5.53176618 |
| C | 0.26763308  | 3.62449818  | -3.89483659 |
| C | -1.78624072 | 3.46058634  | -5.23794335 |
| C | -0.55565255 | 7.00973872  | -5.30094704 |
| C | 1.41676074  | 5.78677198  | -3.66401745 |
| C | -2.69098685 | 5.45894830  | -6.35023097 |
| C | -0.88149459 | 1.46222438  | -4.12565573 |
| C | 1.25383972  | 3.01301481  | -3.07637179 |
| C | -2.85390787 | 2.68519113  | -5.76258531 |
| C | 1.49822125  | 7.17365056  | -3.95784028 |
| C | -2.60952634 | 6.84582688  | -6.64405380 |
| C | 1.17237921  | 1.62613622  | -2.78254897 |
| C | -2.93536838 | 1.29831255  | -5.46876249 |
| C | 0.51201461  | 7.78513399  | -4.77630509 |
| C | -1.54185918 | 7.62122215  | -6.11941184 |
| C | 0.10471205  | 0.85074095  | -3.30719092 |
| C | -1.94916174 | 0.68682911  | -4.65029768 |
| C | 2.40296718  | 5.17528859  | -2.84555279 |
| C | -3.75865380 | 4.68355310  | -6.87487281 |
| C | 2.32150667  | 3.78841000  | -2.55172996 |
| C | -3.84011432 | 3.29667452  | -6.58104998 |
| H | 0.57454415  | 8.84970976  | -5.00184513 |
| H | -1.47932964 | 8.68579792  | -6.34495189 |
| H | 0.04218251  | -0.21383481 | -3.08165087 |

|   |             |             |             |
|---|-------------|-------------|-------------|
| H | -2.01169129 | -0.37774665 | -4.42475763 |
| H | 3.22251459  | 5.77048636  | -2.44283461 |
| H | 3.07852453  | 3.31903190  | -1.92347171 |
| H | -4.51567166 | 5.15293121  | -7.50313105 |
| H | -4.65966172 | 2.70147675  | -6.98376815 |
| H | 2.31776846  | 7.76884838  | -3.55512225 |
| H | 1.92939686  | 1.15675804  | -2.15429084 |
| H | -3.36654399 | 7.31520507  | -7.27231193 |
| H | -3.75491559 | 0.70311473  | -5.87148052 |
| C | -4.76896086 | -3.32320477 | -2.65192331 |
| C | -4.53869616 | -5.18854213 | -0.52281687 |
| C | -4.13271945 | -4.57391866 | -2.86943587 |
| C | -5.29006992 | -3.00515956 | -1.36985753 |
| C | -4.01758710 | -5.50658734 | -1.80488265 |
| C | -5.17493757 | -3.93782824 | -0.30530431 |
| C | -4.88409321 | -2.39053610 | -3.71647653 |
| C | -3.61161039 | -4.89196388 | -4.15150165 |
| C | -5.92631133 | -1.75444567 | -1.15234497 |
| C | -4.42356381 | -6.12121080 | 0.54173636  |
| C | -3.38134569 | -6.75730123 | -2.02239521 |
| C | -5.69604663 | -3.61978302 | 0.97676147  |
| C | -3.72674274 | -3.95929520 | -5.21605487 |
| C | -6.04144367 | -0.82177700 | -2.21689819 |
| C | -3.26621335 | -7.68996991 | -0.95784198 |
| C | -5.58091428 | -4.55245170 | 2.04131470  |
| C | -4.36298415 | -2.70858127 | -4.99854236 |
| C | -5.52033462 | -1.13982217 | -3.49896402 |

|   |             |             |             |
|---|-------------|-------------|-------------|
| C | -3.78732240 | -7.37192473 | 0.32422384  |
| C | -4.94467287 | -5.80316563 | 1.82380218  |
| C | -2.97536909 | -6.14267761 | -4.36901406 |
| C | -6.44742028 | -1.43640061 | 0.12972067  |
| C | -2.86023675 | -7.07534629 | -3.30446084 |
| C | -6.33228793 | -2.36906929 | 1.19427389  |
| H | -4.45136039 | -1.99265958 | -5.81569937 |
| H | -5.60871085 | -0.42390047 | -4.31612103 |
| H | -3.69894617 | -8.08784643 | 1.14138085  |
| H | -4.85629664 | -6.51908732 | 2.64095919  |
| H | -2.57536280 | -6.38681095 | -5.35313506 |
| H | -2.37185421 | -8.03540140 | -3.47142474 |
| H | -6.93580281 | -0.47634550 | 0.29668457  |
| H | -6.73229422 | -2.12493595 | 2.17839489  |
| H | -3.32673656 | -4.20342835 | -6.20017577 |
| H | -2.77783092 | -8.65002490 | -1.12480569 |
| H | -6.52982610 | 0.13827800  | -2.04993448 |
| H | -5.98092046 | -4.30831855 | 3.02543559  |
| C | -1.89277997 | -3.22854282 | 1.06818211  |
| C | -0.51544118 | -5.69402109 | 0.76825829  |
| C | -1.36438784 | -3.59727499 | -0.19721839 |
| C | -1.73250272 | -4.09254978 | 2.18362070  |
| C | -0.67571844 | -4.83001412 | -0.34718029 |
| C | -1.04383332 | -5.32528892 | 2.03365879  |
| C | -2.58144937 | -1.99580369 | 1.21814401  |
| C | -1.52466509 | -2.73326803 | -1.31265698 |
| C | -2.26089485 | -3.72381761 | 3.44902119  |

|   |             |             |             |
|---|-------------|-------------|-------------|
| C | 0.17322821  | -6.92676022 | 0.61829639  |
| C | -0.14732630 | -5.19874629 | -1.61258079 |
| C | -0.88355607 | -6.18929588 | 3.14909738  |
| C | -2.21333449 | -1.50052889 | -1.16269507 |
| C | -2.94956425 | -2.49107848 | 3.59898310  |
| C | 0.54134309  | -6.43148543 | -1.76254270 |
| C | -0.19488667 | -7.42203501 | 2.99913547  |
| C | -2.74172665 | -1.13179667 | 0.10270543  |
| C | -3.10984153 | -1.62707147 | 2.48354451  |
| C | 0.70162038  | -7.29549244 | -0.64710411 |
| C | 0.33350550  | -7.79076723 | 1.73373497  |
| C | -0.99627299 | -3.10200024 | -2.57805724 |
| C | -2.10061756 | -4.58782453 | 4.56445955  |
| C | -0.30760360 | -4.33473938 | -2.72801915 |
| C | -1.41194817 | -5.82056366 | 4.41449764  |
| H | -3.27035313 | -0.18553921 | 0.21781703  |
| H | -3.63846802 | -0.68081401 | 2.59865611  |
| H | 1.23024686  | -8.24174990 | -0.76221571 |
| H | 0.86213198  | -8.73702469 | 1.61862337  |
| H | -1.11930272 | -2.43878358 | -3.43427427 |
| H | 0.09799321  | -4.61778028 | -3.69934779 |
| H | -2.50621437 | -4.30478363 | 5.53578819  |
| H | -1.28891844 | -6.48378032 | 5.27071468  |
| H | -2.33636428 | -0.83731223 | -2.01891187 |
| H | 0.94693989  | -6.71452643 | -2.73387112 |
| H | -3.35516105 | -2.20803748 | 4.57031152  |
| H | -0.07185688 | -8.08525168 | 3.85535227  |

|   |            |             |             |
|---|------------|-------------|-------------|
| C | 3.14519620 | -0.01689671 | 4.19920055  |
| C | 3.54889307 | 0.04425992  | 1.38870447  |
| C | 2.72945227 | -1.11321499 | 3.39817417  |
| C | 3.76278857 | 1.10999989  | 3.59497890  |
| C | 2.93130070 | -1.08263668 | 1.99292613  |
| C | 3.96463700 | 1.14057820  | 2.18973086  |
| C | 2.94334777 | -0.04747502 | 5.60444859  |
| C | 2.11185990 | -2.24011159 | 4.00239582  |
| C | 4.17853250 | 2.20631818  | 4.39600529  |
| C | 3.75074150 | 0.07483823  | -0.01654357 |
| C | 2.51555676 | -2.17895497 | 1.19189974  |
| C | 4.58222937 | 2.26747480  | 1.58550921  |
| C | 1.91001147 | -2.27068990 | 5.40764386  |
| C | 3.97668407 | 2.17573987  | 5.80125333  |
| C | 2.71740520 | -2.14837666 | -0.21334830 |
| C | 4.78407780 | 2.29805311  | 0.18026116  |
| C | 2.32575540 | -1.17437161 | 6.20867031  |
| C | 3.35909170 | 1.04884327  | 6.40547504  |
| C | 3.33499757 | -1.02148006 | -0.81757001 |
| C | 4.36833387 | 1.20173482  | -0.62076528 |
| C | 1.69611607 | -3.33642966 | 3.20136945  |
| C | 4.79612477 | 3.33321456  | 3.79178361  |
| C | 1.89796450 | -3.30585135 | 1.79612141  |
| C | 4.99797320 | 3.36379287  | 2.38653557  |
| H | 2.17081541 | -1.19784370 | 7.28734657  |
| H | 3.20415171 | 1.02537119  | 7.48415130  |
| H | 3.48993756 | -0.99800798 | -1.89624628 |

|   |             |             |             |
|---|-------------|-------------|-------------|
| H | 4.52327386  | 1.22520691  | -1.69944154 |
| H | 1.22204864  | -4.20144192 | 3.66517342  |
| H | 1.57883708  | -4.14739153 | 1.18124900  |
| H | 5.11525219  | 4.17475474  | 4.40665602  |
| H | 5.47204063  | 4.22880513  | 1.92273160  |
| H | 1.43594414  | -3.13570195 | 5.87144791  |
| H | 2.39827788  | -2.98991662 | -0.82822075 |
| H | 4.29581139  | 3.01727983  | 6.41612578  |
| H | 5.25814513  | 3.16306516  | -0.28354288 |
| C | 9.86601408  | 6.90586000  | -3.90670505 |
| C | 11.08092930 | 5.85911090  | -1.56279874 |
| C | 10.57199567 | 5.67503532  | -3.96202832 |
| C | 9.76749010  | 7.61331013  | -2.67942863 |
| C | 11.17945328 | 5.15166076  | -2.79007516 |
| C | 10.37494771 | 7.08993558  | -1.50747547 |
| C | 9.25855646  | 7.42923456  | -5.07865821 |
| C | 10.67051964 | 4.96758519  | -5.18930474 |
| C | 9.06150851  | 8.84413482  | -2.62410537 |
| C | 11.68838692 | 5.33573634  | -0.39084558 |
| C | 11.88543487 | 3.92083608  | -2.84539842 |
| C | 10.27642373 | 7.79738571  | -0.28019905 |
| C | 10.06306203 | 5.49095974  | -6.36125789 |
| C | 8.45405089  | 9.36750937  | -3.79605853 |
| C | 12.49289249 | 3.39746153  | -1.67344527 |
| C | 10.88388135 | 7.27401116  | 0.89175410  |
| C | 9.35708041  | 6.72178445  | -6.30593468 |
| C | 8.55257485  | 8.66005926  | -5.02333500 |



|   |             |             |             |
|---|-------------|-------------|-------------|
| C | 12.39436853 | 4.10491164  | -0.44616880 |
| C | 11.58986297 | 6.04318645  | 0.83643089  |
| C | 11.37650116 | 3.73676069  | -5.24462788 |
| C | 8.96298461  | 9.55158476  | -1.39682907 |
| C | 11.98395877 | 3.21338613  | -4.07267472 |
| C | 9.57044222  | 9.02821021  | -0.22487591 |
| H | 8.89079255  | 7.12352968  | -7.20553248 |
| H | 8.08628698  | 9.06180450  | -5.92293280 |
| H | 12.86065640 | 3.70316640  | 0.45342901  |
| H | 12.05615083 | 5.64144122  | 1.73602869  |
| H | 11.45212873 | 3.19371792  | -6.18669225 |
| H | 12.52587426 | 2.26859808  | -4.11514119 |
| H | 8.42106912  | 10.49637281 | -1.35436260 |
| H | 9.49481464  | 9.57125298  | 0.71718846  |
| H | 10.13868950 | 4.94791718  | -7.30332219 |
| H | 13.03480793 | 2.45267364  | -1.71591156 |
| H | 7.91213545  | 10.31229726 | -3.75359223 |
| H | 10.80825387 | 7.81705372  | 1.83381840  |
| C | 5.68350141  | 1.27939275  | -8.23679176 |
| C | 5.06871158  | -1.47464218 | -7.91597318 |
| C | 6.48775991  | 0.46567274  | -7.39570432 |
| C | 4.57184800  | 0.71609530  | -8.91746991 |
| C | 6.18036499  | -0.91134473 | -7.23529503 |
| C | 4.26445308  | -0.66092217 | -8.75706062 |
| C | 5.99089632  | 2.65641022  | -8.39720105 |
| C | 7.59941332  | 1.02897019  | -6.71502617 |
| C | 3.76758950  | 1.52981531  | -9.75855736 |

|   |            |             |              |
|---|------------|-------------|--------------|
| C | 4.76131667 | -2.85165965 | -7.75556389  |
| C | 6.98462349 | -1.72506474 | -6.39420759  |
| C | 3.15279967 | -1.22421962 | -9.43773878  |
| C | 7.90680823 | 2.40598766  | -6.87543546  |
| C | 4.07498441 | 2.90683278  | -9.91896665  |
| C | 6.67722858 | -3.10208221 | -6.23379830  |
| C | 2.84540476 | -2.60123709 | -9.27732949  |
| C | 7.10254975 | 3.21970773  | -7.71652291  |
| C | 5.18663784 | 3.47013029  | -9.23828850  |
| C | 5.56557515 | -3.66537972 | -6.91447644  |
| C | 3.64966324 | -3.41495716 | -8.43624204  |
| C | 8.40367163 | 0.21525020  | -5.87393887  |
| C | 2.65593627 | 0.96651783  | -10.43923536 |
| C | 8.09627672 | -1.16176727 | -5.71352958  |
| C | 2.34854136 | -0.41049964 | -10.27882607 |
| H | 7.33850780 | 4.27671404  | -7.83965397  |
| H | 5.42259589 | 4.52713660  | -9.36141957  |
| H | 5.32961710 | -4.72238604 | -6.79134538  |
| H | 3.41370519 | -4.47196348 | -8.31311097  |
| H | 9.25698313 | 0.64764052  | -5.35144643  |
| H | 8.71363014 | -1.78638337 | -5.06790606  |
| H | 2.03858285 | 1.59113394  | -11.08485888 |
| H | 1.49522985 | -0.84288996 | -10.80131851 |
| H | 8.76011956 | 2.83837806  | -6.35294317  |
| H | 7.29458180 | -3.72669835 | -5.58817492  |
| H | 3.45763119 | 3.53144892  | -10.56459003 |
| H | 1.99209343 | -3.03362750 | -9.79982177  |

|   |             |             |             |
|---|-------------|-------------|-------------|
| C | 10.41188606 | -2.33718599 | -0.40534864 |
| C | 9.17441428  | -4.77735963 | 0.35610767  |
| C | 10.13287451 | -2.59507139 | 0.96287932  |
| C | 10.07216172 | -3.29938741 | -1.39284844 |
| C | 9.51413861  | -3.81515821 | 1.34360747  |
| C | 9.45342583  | -4.51947423 | -1.01212029 |
| C | 11.03062196 | -1.11709917 | -0.78607679 |
| C | 10.47259884 | -1.63286996 | 1.95037913  |
| C | 10.35117328 | -3.04150201 | -2.76107640 |
| C | 8.55567838  | -5.99744645 | 0.73683582  |
| C | 9.23512706  | -4.07304360 | 2.71183543  |
| C | 9.11370149  | -5.48167565 | -1.99962010 |
| C | 11.09133474 | -0.41278314 | 1.56965098  |
| C | 10.96990917 | -1.82141519 | -3.14180456 |
| C | 8.61639116  | -5.29313042 | 3.09256359  |
| C | 8.49496560  | -6.70176247 | -1.61889195 |
| C | 11.37034632 | -0.15489769 | 0.20142301  |
| C | 11.30963354 | -0.85921372 | -2.15430476 |
| C | 8.27666680  | -6.25533190 | 2.10506379  |
| C | 8.21595402  | -6.95964792 | -0.25066398 |
| C | 10.19358728 | -1.89075543 | 3.31860687  |
| C | 10.01144895 | -4.00370337 | -3.74857599 |
| C | 9.57485139  | -3.11084225 | 3.69933502  |
| C | 9.39271305  | -5.22379019 | -3.36784784 |
| H | 11.84529145 | 0.78164778  | -0.09082605 |
| H | 11.78457867 | 0.07733175  | -2.44655382 |
| H | 7.80172167  | -7.19187737 | 2.39731285  |

|    |             |             |             |
|----|-------------|-------------|-------------|
| H  | 7.74100888  | -7.89619339 | 0.04158508  |
| H  | 10.45436162 | -1.15216414 | 4.07661736  |
| H  | 9.36068054  | -3.30879653 | 4.74959461  |
| H  | 10.22561980 | -3.80574908 | -4.79883558 |
| H  | 9.13193872  | -5.96238148 | -4.12585833 |
| H  | 11.35210909 | 0.32580813  | 2.32766124  |
| H  | 8.40222028  | -5.49108483 | 4.14282296  |
| H  | 11.18408006 | -1.62346079 | -4.19206393 |
| H  | 8.23419125  | -7.44035374 | -2.37690221 |
| Cs | 0.20465800  | 0.10074000  | 0.48149700  |

505

n = 14, Energy = -1356.28254482

|   |             |             |              |
|---|-------------|-------------|--------------|
| C | 0.59311954  | 8.61485088  | -9.97405135  |
| C | 0.46982822  | 11.02433004 | -8.47578270  |
| C | 1.77479390  | 9.15718027  | -9.40315326  |
| C | -0.65020047 | 9.27726107  | -9.79581512  |
| C | 1.71314824  | 10.36191985 | -8.65401894  |
| C | -0.71184613 | 10.48200065 | -9.04668079  |
| C | 0.65476521  | 7.41011130  | -10.72318567 |
| C | 3.01811391  | 8.49477008  | -9.58138950  |
| C | -1.83187483 | 8.73493167  | -10.36671321 |
| C | 0.40818256  | 12.22906962 | -7.72664838  |
| C | 2.89482259  | 10.90424924 | -8.08312085  |
| C | -1.95516615 | 11.14441084 | -8.86844456  |
| C | 3.07975958  | 7.29003050  | -10.33052382 |
| C | -1.77022916 | 7.53019209  | -11.11584753 |
| C | 2.83317693  | 12.10898882 | -7.33398653  |

|   |             |             |              |
|---|-------------|-------------|--------------|
| C | -2.01681181 | 12.34915042 | -8.11931024  |
| C | 1.89808522  | 6.74770106  | -10.90142194 |
| C | -0.52690915 | 6.86778185  | -11.29408379 |
| C | 1.58985691  | 12.77139906 | -7.15575026  |
| C | -0.83513746 | 12.89147986 | -7.54841212  |
| C | 4.19978803  | 9.03709948  | -9.01049144  |
| C | -3.07519461 | 9.39734185  | -10.18847693 |
| C | 4.13814237  | 10.24183906 | -8.26135712  |
| C | -3.13684027 | 10.60208143 | -9.43934261  |
| H | 1.94540478  | 5.82293621  | -11.47646164 |
| H | -0.47958959 | 5.94301701  | -11.86912349 |
| H | 1.54253735  | 13.69616391 | -6.58071056  |
| H | -0.88245702 | 13.81624470 | -6.97337242  |
| H | 5.15416758  | 8.52862966  | -9.14730658  |
| H | 5.04520236  | 10.65813418 | -7.82313250  |
| H | -3.98225459 | 8.98104673  | -10.62670156 |
| H | -4.09121982 | 11.11055126 | -9.30252747  |
| H | 4.03413889  | 6.78156063  | -10.46733903 |
| H | 3.74023668  | 12.52528400 | -6.89576191  |
| H | -2.67728891 | 7.11389691  | -11.55407214 |
| H | -2.97119113 | 12.85762028 | -7.98249503  |
| C | -2.74729196 | 2.24146330  | 6.11343571   |
| C | -0.07639875 | 3.10795856  | 6.53901173   |
| C | -2.31346758 | 3.48826077  | 5.59027937   |
| C | -1.84566973 | 1.42791346  | 6.84938006   |
| C | -0.97802098 | 3.92150840  | 5.80306738   |
| C | -0.51022312 | 1.86116108  | 7.06216807   |

|   |             |             |            |
|---|-------------|-------------|------------|
| C | -4.08273856 | 1.80821568  | 5.90064770 |
| C | -3.21508981 | 4.30181062  | 4.85433502 |
| C | -2.27949410 | 0.18111599  | 7.37253640 |
| C | 1.25904786  | 3.54120618  | 6.75179974 |
| C | -0.54419660 | 5.16830587  | 5.27991105 |
| C | 0.39139911  | 1.04761124  | 7.79811242 |
| C | -4.55053641 | 3.86856299  | 4.64154701 |
| C | -3.61494071 | -0.25213164 | 7.15974838 |
| C | 0.79125000  | 5.60155350  | 5.49269906 |
| C | 1.72684571  | 1.48085887  | 8.01090043 |
| C | -4.98436085 | 2.62176550  | 5.16470334 |
| C | -4.51656299 | 0.56141819  | 6.42380403 |
| C | 1.69287229  | 4.78800367  | 6.22864341 |
| C | 2.16067014  | 2.72765636  | 7.48774410 |
| C | -2.78126539 | 5.54860789  | 4.33117881 |
| C | -1.37787192 | -0.63243366 | 8.10848062 |
| C | -1.44581878 | 5.98185552  | 4.54396682 |
| C | -0.04242531 | -0.19918603 | 8.32126863 |
| H | -6.00945713 | 2.28920220  | 5.00136607 |
| H | -5.54165928 | 0.22885488  | 6.26046676 |
| H | 2.71796858  | 5.12056698  | 6.39198068 |
| H | 3.18576643  | 3.06021966  | 7.65108137 |
| H | -3.47335574 | 6.17309340  | 3.76626373 |
| H | -1.11281274 | 6.93890437  | 4.14238902 |
| H | -1.71087797 | -1.58948251 | 8.51005842 |
| H | 0.64966504  | -0.82367154 | 8.88618371 |
| H | -5.24262678 | 4.49304829  | 4.07663205 |

|   |             |             |             |
|---|-------------|-------------|-------------|
| H | 1.12425615  | 6.55860217  | 5.09112139  |
| H | -3.94794686 | -1.20918031 | 7.56132605  |
| H | 2.41893607  | 0.85637357  | 8.57581540  |
| C | -5.39212437 | 10.92491541 | -2.25556541 |
| C | -7.56493418 | 9.29796708  | -3.09075171 |
| C | -6.39849619 | 10.55220530 | -1.32567133 |
| C | -5.47215744 | 10.48415136 | -3.60305264 |
| C | -7.48490110 | 9.73873113  | -1.74326448 |
| C | -6.55856235 | 9.67067719  | -4.02064579 |
| C | -4.30571946 | 11.73838958 | -1.83797226 |
| C | -6.31846311 | 10.99296935 | 0.02181590  |
| C | -4.46578562 | 10.85686147 | -4.53294671 |
| C | -8.65133908 | 8.48449291  | -3.50834486 |
| C | -8.49127292 | 9.36602102  | -0.81337040 |
| C | -6.63859543 | 9.22991313  | -5.36813301 |
| C | -5.23205821 | 11.80644352 | 0.43940905  |
| C | -3.37938071 | 11.67033563 | -4.11535356 |
| C | -9.57767783 | 8.55254685  | -1.23096355 |
| C | -7.72500033 | 8.41643897  | -5.78572616 |
| C | -4.22568634 | 12.17915367 | -0.49048501 |
| C | -3.29934759 | 12.11109972 | -2.76786632 |
| C | -9.65771095 | 8.11178276  | -2.57845080 |
| C | -8.73137221 | 8.04372882  | -4.85583210 |
| C | -7.32483485 | 10.62025923 | 0.95170976  |
| C | -4.54581879 | 10.41609742 | -5.88043372 |
| C | -8.41123975 | 9.80678507  | 0.53411661  |
| C | -5.63222369 | 9.60262325  | -6.29802687 |

|   |              |             |             |
|---|--------------|-------------|-------------|
| H | -3.39175585  | 12.80358099 | -0.16993817 |
| H | -2.46541710  | 12.73552705 | -2.44731948 |
| H | -10.49164144 | 7.48735544  | -2.89899764 |
| H | -9.56530269  | 7.41930150  | -5.17637894 |
| H | -7.26340102  | 10.95859223 | 1.98604864  |
| H | -9.18373650  | 9.52069067  | 1.24790862  |
| H | -3.77332204  | 10.70219182 | -6.59422573 |
| H | -5.69365752  | 9.26429026  | -7.33236576 |
| H | -5.17062424  | 12.14477654 | 1.47374773  |
| H | -10.35017453 | 8.26645241  | -0.51717178 |
| H | -2.60688401  | 11.95643007 | -4.82914534 |
| H | -7.78643430  | 8.07810595  | -6.82006485 |
| C | 1.51856166   | 6.48913137  | -6.87608538 |
| C | 3.47023292   | 8.05436665  | -5.53198072 |
| C | 1.13151293   | 7.67015459  | -6.18922476 |
| C | 2.88144603   | 6.09072579  | -6.89089367 |
| C | 2.10734855   | 8.45277223  | -5.51717243 |
| C | 3.85728165   | 6.87334344  | -6.21884134 |
| C | 0.54272604   | 5.70651373  | -7.54813771 |
| C | -0.23137144  | 8.06856016  | -6.17441647 |
| C | 3.26849476   | 4.90970258  | -7.57775429 |
| C | 4.44606854   | 8.83698429  | -4.85992839 |
| C | 1.72029982   | 9.63379545  | -4.83031181 |
| C | 5.22016602   | 6.47493786  | -6.23364963 |
| C | -1.20720706  | 7.28594252  | -6.84646880 |
| C | 2.29265914   | 4.12708493  | -8.24980662 |
| C | 2.69613544   | 10.41641309 | -4.15825948 |



|   |             |             |             |
|---|-------------|-------------|-------------|
| C | 6.19600164  | 7.25755550  | -5.56159730 |
| C | -0.82015837 | 6.10491927  | -7.53332945 |
| C | 0.92977473  | 4.52549048  | -8.23499836 |
| C | 4.05901985  | 10.01800755 | -4.17306774 |
| C | 5.80895295  | 8.43857875  | -4.87473665 |
| C | -0.61842001 | 9.24958323  | -5.48755592 |
| C | 4.63137896  | 4.51129715  | -7.59256251 |
| C | 0.35741562  | 10.03220087 | -4.81550359 |
| C | 5.60721458  | 5.29391479  | -6.92051018 |
| H | -1.56921526 | 5.50417759  | -8.04920058 |
| H | 0.18071784  | 3.92474879  | -8.75086949 |
| H | 4.80807674  | 10.61874923 | -3.65719661 |
| H | 6.55800984  | 9.03932043  | -4.35886552 |
| H | -1.66457781 | 9.55540163  | -5.47618898 |
| H | 0.06031479  | 10.93876102 | -4.28826546 |
| H | 4.92847979  | 3.60473700  | -8.11980063 |
| H | 6.65337239  | 4.98809639  | -6.93187712 |
| H | -2.25336474 | 7.59176074  | -6.83510196 |
| H | 2.39903482  | 11.32297312 | -3.63102139 |
| H | 2.58975976  | 3.22052490  | -8.77704470 |
| H | 7.24215932  | 6.95173728  | -5.57296414 |
| C | -2.60048918 | -0.45325232 | -1.23613883 |
| C | -4.60963481 | 0.51203469  | 0.52373456  |
| C | -3.42681820 | -1.36839152 | -0.53179469 |
| C | -2.77873297 | 0.94453038  | -1.06054628 |
| C | -4.43139102 | -0.88574801 | 0.34814201  |
| C | -3.78330578 | 1.42717389  | -0.18060958 |

|   |             |             |             |
|---|-------------|-------------|-------------|
| C | -1.59591637 | -0.93589583 | -2.11607552 |
| C | -3.24857441 | -2.76617422 | -0.70738724 |
| C | -1.95240395 | 1.85966958  | -1.76489042 |
| C | -5.61420762 | 0.99467820  | 1.40367125  |
| C | -5.25772004 | -1.80088721 | 1.05248615  |
| C | -3.96154957 | 2.82495659  | -0.00501703 |
| C | -2.24400160 | -3.24881773 | -1.58732393 |
| C | -0.94783113 | 1.37702607  | -2.64482712 |
| C | -6.26229285 | -1.31824370 | 1.93242285  |
| C | -4.96612239 | 3.30760010  | 0.87491966  |
| C | -1.41767253 | -2.33367855 | -2.29166811 |
| C | -0.76958730 | -0.02075665 | -2.82041971 |
| C | -6.44053669 | 0.07953902  | 2.10801544  |
| C | -5.79245145 | 2.39246092  | 1.57926384  |
| C | -4.07490337 | -3.68131319 | -0.00304314 |
| C | -2.13064780 | 3.25745206  | -1.58929782 |
| C | -5.07947619 | -3.19866969 | 0.87689355  |
| C | -3.13522061 | 3.74009556  | -0.70936113 |
| H | -0.64655682 | -2.70415841 | -2.96711244 |
| H | 0.00152841  | -0.39123651 | -3.49586404 |
| H | -7.21165240 | 0.45001888  | 2.78345977  |
| H | -6.56356717 | 2.76294078  | 2.25470817  |
| H | -3.93808244 | -4.75425917 | -0.13782897 |
| H | -5.71377105 | -3.90113577 | 1.41755213  |
| H | -1.49635294 | 3.95991814  | -2.12995640 |
| H | -3.27204155 | 4.81304154  | -0.57457530 |
| H | -2.10718056 | -4.32176350 | -1.72210985 |

|   |              |             |              |
|---|--------------|-------------|--------------|
| H | -6.89658769  | -2.02070954 | 2.47308141   |
| H | -0.31353629  | 2.07949191  | -3.18548568  |
| H | -5.10294343  | 4.38054587  | 1.00970558   |
| C | -8.73233522  | 3.29753640  | -9.69549628  |
| C | -7.45511442  | 5.62672571  | -10.70007765 |
| C | -7.66293362  | 3.17725500  | -10.62194794 |
| C | -9.16312642  | 4.58241246  | -9.27133530  |
| C | -7.02432322  | 4.34184965  | -11.12423863 |
| C | -8.52451602  | 5.74700711  | -9.77362599  |
| C | -9.37094562  | 2.13294175  | -9.19320559  |
| C | -7.23214242  | 1.89237894  | -11.04610892 |
| C | -10.23252802 | 4.70269387  | -8.34488364  |
| C | -6.81650402  | 6.79132036  | -11.20236833 |
| C | -5.95492162  | 4.22156824  | -12.05069029 |
| C | -8.95530722  | 7.03188317  | -9.34946501  |
| C | -7.87075282  | 0.72778429  | -10.54381823 |
| C | -10.87113841 | 3.53809921  | -7.84259295  |
| C | -5.31631123  | 5.38616290  | -12.55298097 |
| C | -8.31669682  | 8.19647782  | -9.85175569  |
| C | -8.94015445  | 0.84806564  | -9.61736655  |
| C | -10.44034724 | 2.25322311  | -8.26675391  |
| C | -5.74710240  | 6.67103900  | -12.12882001 |
| C | -7.24729519  | 8.07619647  | -10.77820738 |
| C | -6.16274097  | 1.77209767  | -11.97256045 |
| C | -10.66331907 | 5.98756979  | -7.92072279  |
| C | -5.52413057  | 2.93669232  | -12.47485113 |
| C | -10.02470867 | 7.15216444  | -8.42301348  |

|   |              |             |              |
|---|--------------|-------------|--------------|
| H | -9.43035536  | -0.04588373 | -9.23180541  |
| H | -10.93054816 | 1.35927373  | -7.88119277  |
| H | -5.25690148  | 7.56498838  | -12.51438116 |
| H | -6.75709428  | 8.97014584  | -11.16376852 |
| H | -5.83206317  | 0.78581949  | -12.29814885 |
| H | -4.70325181  | 2.84436361  | -13.18600071 |
| H | -11.48419783 | 6.07989850  | -7.20957321  |
| H | -10.35538647 | 8.13844262  | -8.09742508  |
| H | -7.54007520  | -0.25849381 | -10.86940648 |
| H | -4.49543258  | 5.29383437  | -13.26413044 |
| H | -11.69201706 | 3.63042774  | -7.13144348  |
| H | -8.64737444  | 9.18275592  | -9.52616745  |
| C | 6.27820191   | -3.03149686 | -1.74834073  |
| C | 5.16099705   | -4.49443002 | 0.41436114   |
| C | 5.59514453   | -4.25187098 | -1.99434825  |
| C | 6.40265686   | -2.54258932 | -0.42098228  |
| C | 5.03654210   | -4.98333756 | -0.91299731  |
| C | 5.84405443   | -3.27405591 | 0.66036866   |
| C | 6.83680434   | -2.30003028 | -2.82969166  |
| C | 5.47068958   | -4.74077851 | -3.32170670  |
| C | 7.08571425   | -1.32221521 | -0.17497476  |
| C | 4.60239462   | -5.22589661 | 1.49571207   |
| C | 4.35348471   | -6.20371168 | -1.15900483  |
| C | 5.96850939   | -2.78514837 | 1.98772711   |
| C | 6.02929201   | -4.00931193 | -4.40305763  |
| C | 7.64431668   | -0.59074862 | -1.25632569  |
| C | 3.79488228   | -6.93517826 | -0.07765390  |

|   |             |             |             |
|---|-------------|-------------|-------------|
| C | 5.40990696  | -3.51661495 | 3.06907805  |
| C | 6.71234941  | -2.78893778 | -4.15705016 |
| C | 7.51986175  | -1.07965613 | -2.58368419 |
| C | 3.91933721  | -6.44627076 | 1.24970460  |
| C | 4.72684955  | -4.73698910 | 2.82307057  |
| C | 4.78763227  | -5.96115247 | -3.56771407 |
| C | 7.21016912  | -0.83330784 | 1.15238354  |
| C | 4.22902984  | -6.69261905 | -2.48636313 |
| C | 6.65156669  | -1.56477442 | 2.23373448  |
| H | 7.14113577  | -2.22745994 | -4.98710119 |
| H | 7.94864810  | -0.51817829 | -3.41373522 |
| H | 3.49055086  | -7.00774860 | 2.07975563  |
| H | 4.29806320  | -5.29846694 | 3.65312160  |
| H | 4.69209993  | -6.33644070 | -4.58660198 |
| H | 3.70471110  | -7.62938518 | -2.67519993 |
| H | 7.73448786  | 0.10345830  | 1.34122034  |
| H | 6.74709903  | -1.18948619 | 3.25262239  |
| H | 5.93375977  | -4.38459997 | -5.42194544 |
| H | 3.27056360  | -7.87194426 | -0.26649049 |
| H | 8.16863536  | 0.34601737  | -1.06748909 |
| H | 5.50543919  | -3.14132692 | 4.08796585  |
| C | -5.28491543 | 6.97753586  | -1.02799473 |
| C | -4.58440004 | 8.14693891  | 1.46346553  |
| C | -4.11066060 | 7.76867303  | -0.92016315 |
| C | -6.10891256 | 6.77110022  | 0.10990382  |
| C | -3.76040290 | 8.35337455  | 0.32556698  |
| C | -5.75865487 | 7.35580174  | 1.35563395  |

|   |             |            |             |
|---|-------------|------------|-------------|
| C | -5.63517312 | 6.39283434 | -2.27372486 |
| C | -3.28666346 | 7.97510868 | -2.05806171 |
| C | -7.28316739 | 5.97996305 | 0.00207225  |
| C | -4.23414234 | 8.73164043 | 2.70919566  |
| C | -2.58614807 | 9.14451172 | 0.43339855  |
| C | -6.58265201 | 7.14936609 | 2.49353251  |
| C | -3.63692116 | 7.39040716 | -3.30379184 |
| C | -7.63342509 | 5.39526153 | -1.24365788 |
| C | -2.23589038 | 9.72921324 | 1.67912868  |
| C | -6.23239431 | 7.73406761 | 3.73926264  |
| C | -4.81117600 | 6.59926997 | -3.41162347 |
| C | -6.80942797 | 5.60169715 | -2.38155649 |
| C | -3.05988750 | 9.52277762 | 2.81702729  |
| C | -5.05813947 | 8.52520480 | 3.84709427  |
| C | -2.11240882 | 8.76624576 | -1.95023003 |
| C | -8.10716434 | 5.77352749 | 1.13997070  |
| C | -1.76215113 | 9.35094728 | -0.70449990 |
| C | -7.75690664 | 6.35822901 | 2.38570083  |
| H | -5.08003577 | 6.15044981 | -4.36785289 |
| H | -7.07828773 | 5.15287699 | -3.33778591 |
| H | -2.79102773 | 9.97159778 | 3.77325671  |
| H | -4.78927970 | 8.97402496 | 4.80332369  |
| H | -1.47990391 | 8.92470695 | -2.82368744 |
| H | -0.86078642 | 9.95822868 | -0.62172779 |
| H | -9.00852905 | 5.16624609 | 1.05719859  |
| H | -8.38941156 | 6.19976782 | 3.25915824  |
| H | -3.00441645 | 7.54886823 | -4.17724920 |

|   |             |             |             |
|---|-------------|-------------|-------------|
| H | -1.33452585 | 10.33649457 | 1.76190095  |
| H | -8.53478962 | 4.78798020  | -1.32643015 |
| H | -6.86489902 | 7.57560654  | 4.61272000  |
| C | 3.03842869  | 4.58359716  | -3.57486943 |
| C | 5.43267544  | 5.57119175  | -2.40960598 |
| C | 3.01299225  | 5.77395134  | -2.80104129 |
| C | 4.26098851  | 3.88704027  | -3.76606584 |
| C | 4.21011563  | 6.26774864  | -2.21840957 |
| C | 5.45811188  | 4.38083757  | -3.18343411 |
| C | 1.84130531  | 4.08979986  | -4.15750115 |
| C | 1.79043243  | 6.47050823  | -2.60984488 |
| C | 4.28642495  | 2.69668609  | -4.53989397 |
| C | 6.62979882  | 6.06498905  | -1.82697426 |
| C | 4.18467918  | 7.45810283  | -1.44458144 |
| C | 6.68067170  | 3.68428068  | -3.37463052 |
| C | 0.59330905  | 5.97671094  | -3.19247661 |
| C | 3.08930157  | 2.20288879  | -5.12252569 |
| C | 5.38180256  | 7.95190012  | -0.86194972 |
| C | 7.87779508  | 4.17807798  | -2.79199880 |
| C | 0.61874544  | 4.78635673  | -3.96630476 |
| C | 1.86674170  | 2.89944566  | -4.93132930 |
| C | 6.60436243  | 7.25534326  | -1.05314610 |
| C | 7.85235869  | 5.36843218  | -2.01817065 |
| C | 1.76499611  | 7.66086224  | -1.83601685 |
| C | 5.50898464  | 2.00012938  | -4.73109028 |
| C | 2.96211949  | 8.15465953  | -1.25338512 |
| C | 6.70610802  | 2.49392668  | -4.14845856 |

|   |             |             |             |
|---|-------------|-------------|-------------|
| H | -0.30017317 | 4.40731516  | -4.41353613 |
| H | 0.94782309  | 2.52040409  | -5.37856067 |
| H | 7.52328104  | 7.63438483  | -0.60591473 |
| H | 8.77127730  | 5.74747375  | -1.57093928 |
| H | 0.82655223  | 8.19554329  | -1.68925338 |
| H | 2.94259431  | 9.06838220  | -0.65939024 |
| H | 5.52850982  | 1.08640672  | -5.32508517 |
| H | 7.64455190  | 1.95924562  | -4.29522203 |
| H | -0.34513476 | 6.51139179  | -3.04571326 |
| H | 5.36227756  | 8.86562263  | -0.26795490 |
| H | 3.10882657  | 1.28916629  | -5.71652050 |
| H | 8.81623889  | 3.64339713  | -2.93876215 |
| C | 0.80228086  | -5.09960040 | -1.86726717 |
| C | 2.32607080  | -2.73656409 | -1.46761344 |
| C | 1.01515213  | -4.60583774 | -0.55300528 |
| C | 1.35130456  | -4.41184491 | -2.98170220 |
| C | 1.77704710  | -3.42431958 | -0.35317841 |
| C | 2.11319953  | -3.23032675 | -2.78187534 |
| C | 0.04038589  | -6.28111856 | -2.06709403 |
| C | 0.46612843  | -5.29359323 | 0.56142976  |
| C | 1.13843328  | -4.90560758 | -4.29596410 |
| C | 3.08796577  | -1.55504593 | -1.26778658 |
| C | 1.98991838  | -2.93055692 | 0.96108348  |
| C | 2.66222322  | -2.54257126 | -3.89631037 |
| C | -0.29576654 | -6.47511139 | 0.36160289  |
| C | 0.37653831  | -6.08712573 | -4.49579096 |
| C | 2.75181335  | -1.74903876 | 1.16091035  |



|   |             |             |             |
|---|-------------|-------------|-------------|
| C | 3.42411819  | -1.36105310 | -3.69648351 |
| C | -0.50863784 | -6.96887410 | -0.95265901 |
| C | -0.17248542 | -6.77488128 | -3.38135594 |
| C | 3.30083707  | -1.06128322 | 0.04647532  |
| C | 3.63698950  | -0.86729039 | -2.38222160 |
| C | 0.67899974  | -4.79983055 | 1.87569141  |
| C | 1.68745695  | -4.21785210 | -5.41039889 |
| C | 1.44089471  | -3.61831239 | 2.07551828  |
| C | 2.44935192  | -3.03633395 | -5.21057203 |
| H | -1.09347268 | -7.87581405 | -1.10604723 |
| H | -0.75732026 | -7.68182123 | -3.53474416 |
| H | 3.88567192  | -0.15434327 | 0.19986354  |
| H | 4.22182434  | 0.03964956  | -2.22883338 |
| H | 0.25756603  | -5.32775557 | 2.73113811  |
| H | 1.60429590  | -3.23929737 | 3.08435321  |
| H | 1.52405575  | -4.59686713 | -6.41923383 |
| H | 2.87078563  | -2.50840892 | -6.06601873 |
| H | -0.71720025 | -7.00303645 | 1.21704935  |
| H | 2.91521460  | -1.37002367 | 2.16974505  |
| H | 0.21313705  | -6.46614083 | -5.50462567 |
| H | 3.84555191  | -0.83312805 | -4.55192996 |
| C | 1.98927078  | 0.17309634  | 4.53480131  |
| C | -0.28950350 | -1.51806249 | 4.64780180  |
| C | 2.08533314  | -1.10828057 | 5.13915660  |
| C | 0.75382128  | 0.60889383  | 3.98694627  |
| C | 0.94594601  | -1.95385999 | 5.19565685  |
| C | -0.38556586 | -0.23668559 | 4.04344651  |

|   |             |             |            |
|---|-------------|-------------|------------|
| C | 3.12865792  | 1.01867575  | 4.47830106 |
| C | 3.32078265  | -1.54407806 | 5.68701164 |
| C | 0.65775891  | 1.89027074  | 3.38259097 |
| C | -1.42889064 | -2.36364191 | 4.70430205 |
| C | 1.04200837  | -3.23523690 | 5.80001214 |
| C | -1.62101537 | 0.19911191  | 3.49559147 |
| C | 4.46016979  | -0.69849865 | 5.63051139 |
| C | 1.79714605  | 2.73585015  | 3.32609073 |
| C | -0.09737877 | -4.08081631 | 5.85651238 |
| C | -2.76040250 | -0.64646751 | 3.55209172 |
| C | 4.36410747  | 0.58287830  | 5.02615610 |
| C | 3.03259560  | 2.30005270  | 3.87394577 |
| C | -1.33282832 | -3.64501885 | 5.30865735 |
| C | -2.66434019 | -1.92784445 | 4.15644701 |
| C | 3.41684488  | -2.82545481 | 6.29136682 |
| C | -0.57769046 | 2.32606806  | 2.83473604 |
| C | 2.27745774  | -3.67103422 | 6.34786707 |
| C | -1.71707760 | 1.48048865  | 2.89123629 |
| H | 5.23870741  | 1.23194979  | 4.98278619 |
| H | 3.90719555  | 2.94912419  | 3.83057586 |
| H | -2.20742826 | -4.29409035 | 5.35202725 |
| H | -3.53894013 | -2.57691594 | 4.19981692 |
| H | 4.36518296  | -3.15997546 | 6.71190348 |
| H | 2.35119578  | -4.65462644 | 6.81177364 |
| H | -0.65142850 | 3.30966029  | 2.37082947 |
| H | -2.66541568 | 1.81500931  | 2.47069963 |
| H | 5.40850778  | -1.03301910 | 6.05104794 |

|   |             |             |             |
|---|-------------|-------------|-------------|
| H | -0.02364091 | -5.06440840 | 6.32041885  |
| H | 1.72340819  | 3.71944224  | 2.86218426  |
| H | -3.70874050 | -0.31194705 | 3.13155517  |
| C | 3.91495826  | 4.47392843  | 0.81625842  |
| C | 3.80346706  | 6.84352957  | 2.37771916  |
| C | 5.09101787  | 4.97036226  | 1.43822089  |
| C | 2.68315305  | 5.16229516  | 0.97502632  |
| C | 5.03527227  | 6.15516283  | 2.21895126  |
| C | 2.62740745  | 6.34709573  | 1.75575669  |
| C | 3.97070385  | 3.28912786  | 0.03552804  |
| C | 6.32282307  | 4.28199553  | 1.27945299  |
| C | 1.50709344  | 4.66586132  | 0.35306385  |
| C | 3.74772146  | 8.02833014  | 3.15844953  |
| C | 6.21133188  | 6.65159667  | 2.84091373  |
| C | 1.39560224  | 7.03546246  | 1.91452459  |
| C | 6.37856867  | 3.09719496  | 0.49872261  |
| C | 1.56283904  | 3.48106075  | -0.42766653 |
| C | 6.15558628  | 7.83639724  | 3.62164410  |
| C | 1.33985664  | 8.22026303  | 2.69525497  |
| C | 5.20250907  | 2.60076107  | -0.12323989 |
| C | 2.79464425  | 2.79269397  | -0.58643446 |
| C | 4.92378107  | 8.52476403  | 3.78041204  |
| C | 2.51591625  | 8.71669692  | 3.31721747  |
| C | 7.49888245  | 4.77842939  | 1.90141541  |
| C | 0.27528846  | 5.35422804  | 0.51183179  |
| C | 7.44313685  | 5.96322996  | 2.68214579  |
| C | 0.21954287  | 6.53902861  | 1.29256217  |

|   |             |             |              |
|---|-------------|-------------|--------------|
| H | 5.24529970  | 1.69130152  | -0.72253289  |
| H | 2.83743488  | 1.88323442  | -1.18572746  |
| H | 4.88099044  | 9.43422357  | 4.37970504   |
| H | 2.47312562  | 9.62615647  | 3.91651047   |
| H | 8.44442316  | 4.25003517  | 1.77954428   |
| H | 8.34588693  | 6.34429539  | 3.15956772   |
| H | -0.62746161 | 4.97316261  | 0.03440986   |
| H | -0.72599785 | 7.06742282  | 1.41443330   |
| H | 7.32410915  | 2.56880071  | 0.37685140   |
| H | 7.05833612  | 8.21746274  | 4.09906603   |
| H | 0.66008920  | 3.09999525  | -0.90508845  |
| H | 0.39431616  | 8.74865728  | 2.81712618   |
| C | -4.67519545 | 2.88913422  | -8.51146608  |
| C | -6.04439330 | 0.63430108  | -7.45950398  |
| C | -4.29693963 | 1.57955488  | -8.90936630  |
| C | -5.73805019 | 3.07129698  | -7.58758481  |
| C | -4.98153855 | 0.45213832  | -8.38338525  |
| C | -6.42264911 | 1.94388041  | -7.06160376  |
| C | -3.99059652 | 4.01655079  | -9.03744714  |
| C | -3.23408489 | 1.39739212  | -9.83324757  |
| C | -6.11630601 | 4.38087632  | -7.18968460  |
| C | -6.72899222 | -0.49311549 | -6.93352292  |
| C | -4.60328274 | -0.85744102 | -8.78128546  |
| C | -7.48550386 | 2.12604318  | -6.13772249  |
| C | -2.54948596 | 2.52480869  | -10.35922862 |
| C | -5.43170708 | 5.50829289  | -7.71566565  |
| C | -5.28788166 | -1.98485759 | -8.25530441  |

|   |             |             |              |
|---|-------------|-------------|--------------|
| C | -8.17010278 | 0.99862661  | -5.61174144  |
| C | -2.92774175 | 3.83438807  | -9.96132843  |
| C | -4.36885231 | 5.32613017  | -8.63954694  |
| C | -6.35073643 | -1.80269487 | -7.33142312  |
| C | -7.79184699 | -0.31095277 | -6.00964163  |
| C | -2.85582921 | 0.08781293  | -10.23114766 |
| C | -7.17916061 | 4.56303894  | -6.26580346  |
| C | -3.54042813 | -1.03960364 | -9.70516661  |
| C | -7.86375953 | 3.43562237  | -5.73982240  |
| H | -2.40223978 | 4.69979934  | -10.36507443 |
| H | -3.84335034 | 6.19154144  | -9.04329294  |
| H | -6.87623840 | -2.66810614 | -6.92767712  |
| H | -8.31734896 | -1.17636404 | -5.60589563  |
| H | -2.03997585 | -0.05201626 | -10.94032419 |
| H | -3.25007680 | -2.04484420 | -10.01059709 |
| H | -7.46951194 | 5.56827949  | -5.96037297  |
| H | -8.67961289 | 3.57545156  | -5.03064587  |
| H | -1.73363271 | 2.38497969  | -11.06840505 |
| H | -4.99753049 | -2.99009805 | -8.56073475  |
| H | -5.72205825 | 6.51353335  | -7.41023531  |
| H | -8.98595603 | 1.13845561  | -4.90256501  |
| C | -4.58635310 | -0.14881766 | -4.08359815  |
| C | -2.56162385 | -1.14289664 | -5.80925104  |
| C | -3.72252411 | 0.75379340  | -4.75850023  |
| C | -4.43781746 | -1.54846821 | -4.27152251  |
| C | -2.71015949 | 0.25675391  | -5.62132668  |
| C | -3.42545284 | -2.04550771 | -5.13434896  |

|   |             |             |             |
|---|-------------|-------------|-------------|
| C | -5.59871773 | 0.34822183  | -3.22077170 |
| C | -3.87105975 | 2.15344396  | -4.57057587 |
| C | -5.30164645 | -2.45107927 | -3.59662042 |
| C | -1.54925922 | -1.63993614 | -6.67207749 |
| C | -1.84633050 | 1.15936497  | -6.29622876 |
| C | -3.27691720 | -3.44515826 | -5.32227332 |
| C | -4.88342438 | 2.65048345  | -3.70774942 |
| C | -6.31401108 | -1.95403978 | -2.73379398 |
| C | -0.83396587 | 0.66232548  | -7.15905521 |
| C | -2.26455257 | -3.94219775 | -6.18509977 |
| C | -5.74725341 | 1.74787241  | -3.03284729 |
| C | -6.46254676 | -0.55438921 | -2.54586957 |
| C | -0.68543019 | -0.73732510 | -7.34697962 |
| C | -1.40072354 | -3.03958671 | -6.86000190 |
| C | -3.00723083 | 3.05605480  | -5.24547790 |
| C | -5.15311075 | -3.85072961 | -3.78454484 |
| C | -1.99486620 | 2.55901530  | -6.10830435 |
| C | -4.14074612 | -4.34776910 | -4.64737129 |
| H | -6.52435016 | 2.12940271  | -2.37053688 |
| H | -7.23964352 | -0.17285891 | -1.88355916 |
| H | 0.09166657  | -1.11885539 | -8.00929003 |
| H | -0.62362679 | -3.42111701 | -7.52231231 |
| H | -3.12124762 | 4.13043455  | -5.10122610 |
| H | -1.33178615 | 3.25186472  | -6.62636303 |
| H | -5.81619080 | -4.54357902 | -3.26648615 |
| H | -4.02672933 | -5.42214885 | -4.79162309 |
| H | -4.99744128 | 3.72486300  | -3.56349753 |

|    |             |             |             |
|----|-------------|-------------|-------------|
| H  | -0.17088584 | 1.35517465  | -7.67711389 |
| H  | -6.97709111 | -2.64688895 | -2.21573530 |
| H  | -2.15053567 | -5.01657730 | -6.32935166 |
| Cs | 0.20465800  | 0.10074000  | 0.48149700  |

541

n = 15, Energy = -1435.92636438

|   |            |             |             |
|---|------------|-------------|-------------|
| C | 6.38880810 | -4.62212511 | 0.79990167  |
| C | 7.18700495 | -2.83030366 | -1.25384057 |
| C | 7.41794991 | -4.99297734 | -0.10549097 |
| C | 5.75876472 | -3.35536216 | 0.67842319  |
| C | 7.81704834 | -4.09706662 | -1.13236209 |
| C | 6.15786314 | -2.45945143 | -0.34844793 |
| C | 5.98970967 | -5.51803584 | 1.82677279  |
| C | 8.04799329 | -6.25974030 | 0.01598751  |
| C | 4.72962291 | -2.98450992 | 1.58381583  |
| C | 7.58610338 | -1.93439294 | -2.28071169 |
| C | 8.84619015 | -4.46791885 | -2.03775473 |
| C | 5.52781976 | -1.19268847 | -0.46992641 |
| C | 7.64889487 | -7.15565103 | 1.04285863  |
| C | 4.33052448 | -3.88042065 | 2.61068695  |
| C | 9.24528857 | -3.57200813 | -3.06462585 |
| C | 5.92691818 | -0.29677775 | -1.49679753 |
| C | 6.61975304 | -6.78479883 | 1.94825131  |
| C | 4.96056785 | -5.14718364 | 2.73216547  |
| C | 8.61524520 | -2.30524513 | -3.18610437 |
| C | 6.95606001 | -0.66762994 | -2.40219021 |
| C | 9.07713494 | -6.63059238 | -0.88940506 |

|   |             |             |             |
|---|-------------|-------------|-------------|
| C | 4.09957968  | -1.71774713 | 1.46233727  |
| C | 9.47623337  | -5.73468165 | -1.91627618 |
| C | 4.49867811  | -0.82183640 | 0.43546616  |
| H | 6.31340285  | -7.47250492 | 2.73648333  |
| H | 4.65421766  | -5.83488973 | 3.52039749  |
| H | 8.92159539  | -1.61753904 | -3.97433639 |
| H | 7.26241020  | 0.02007615  | -3.19042223 |
| H | 9.56075985  | -7.60296684 | -0.79615750 |
| H | 10.26620849 | -6.01934995 | -2.61126072 |
| H | 3.30960456  | -1.43307882 | 2.15732182  |
| H | 4.01505320  | 0.15053807  | 0.34221860  |
| H | 8.13251960  | -8.12802537 | 1.13610630  |
| H | 10.03526355 | -3.85667623 | -3.75961037 |
| H | 3.54054950  | -3.59575254 | 3.30567146  |
| H | 5.44329346  | 0.67559660  | -1.59004521 |
| C | -2.94173794 | 2.22042953  | 6.33223014  |
| C | -1.31240051 | 0.01501175  | 7.07181887  |
| C | -1.55931353 | 2.41463733  | 6.59220349  |
| C | -3.50949364 | 0.92351284  | 6.44205116  |
| C | -0.74464481 | 1.31192844  | 6.96199785  |
| C | -2.69482493 | -0.17919604 | 6.81184552  |
| C | -3.75640666 | 3.32313842  | 5.96243578  |
| C | -0.99155783 | 3.71155401  | 6.48238247  |
| C | -4.89191806 | 0.72930505  | 6.18207781  |
| C | -0.49773179 | -1.08769713 | 7.44161323  |
| C | 0.63777961  | 1.50613624  | 7.22197120  |
| C | -3.26258063 | -1.47611273 | 6.92166654  |



|   |             |             |            |
|---|-------------|-------------|------------|
| C | -1.80622654 | 4.81426290  | 6.11258811 |
| C | -5.70658678 | 1.83201394  | 5.81228345 |
| C | 1.45244832  | 0.40342735  | 7.59176556 |
| C | -2.44791191 | -2.57882161 | 7.29146090 |
| C | -3.18865099 | 4.62005515  | 5.85261475 |
| C | -5.13883111 | 3.12893067  | 5.70246242 |
| C | 0.88469266  | -0.89348938 | 7.70158659 |
| C | -1.06548746 | -2.38461386 | 7.55143426 |
| C | 0.39086640  | 3.90576166  | 6.74235580 |
| C | -5.45967357 | -0.56761149 | 6.29189884 |
| C | 1.20553512  | 2.80305277  | 7.11215016 |
| C | -4.64500486 | -1.67032038 | 6.66169321 |
| H | -3.81399526 | 5.46650066  | 5.56875853 |
| H | -5.76417538 | 3.97537618  | 5.41860620 |
| H | 1.51003692  | -1.73993490 | 7.98544281 |
| H | -0.44014319 | -3.23105938 | 7.83529048 |
| H | 0.82667893  | 4.90128230  | 6.65805657 |
| H | 2.26669198  | 2.95212781  | 7.31170718 |
| H | -6.52083044 | -0.71668652 | 6.09234183 |
| H | -5.08081739 | -2.66584102 | 6.74599244 |
| H | -1.37041424 | 5.80978344  | 6.02828884 |
| H | 2.51360503  | 0.55250219  | 7.79132258 |
| H | -6.76774349 | 1.68293909  | 5.61272643 |
| H | -2.88372422 | -3.57434215 | 7.37576016 |
| C | 6.47931556  | 3.40162913  | 6.23414794 |
| C | 8.64192238  | 2.97684883  | 4.44297710 |
| C | 7.29522575  | 2.24709105  | 6.36731117 |

|   |             |             |            |
|---|-------------|-------------|------------|
| C | 6.74470878  | 4.34377706  | 5.20539928 |
| C | 8.37652916  | 2.03470089  | 5.47172576 |
| C | 7.82601219  | 4.13138691  | 4.30981387 |
| C | 5.39801215  | 3.61401929  | 7.12973335 |
| C | 7.02983253  | 1.30494312  | 7.39605983 |
| C | 5.92879859  | 5.49831515  | 5.07223604 |
| C | 9.72322579  | 2.76445867  | 3.54739169 |
| C | 9.19243935  | 0.88016281  | 5.60488900 |
| C | 8.09140541  | 5.07353484  | 3.28106521 |
| C | 5.94852912  | 1.51733327  | 8.29164524 |
| C | 4.84749518  | 5.71070530  | 5.96782146 |
| C | 10.27374276 | 0.66777266  | 4.70930358 |
| C | 9.17270882  | 4.86114469  | 2.38547980 |
| C | 5.13261889  | 2.67187137  | 8.15848204 |
| C | 4.58210191  | 4.76855738  | 6.99657015 |
| C | 10.53913603 | 1.60992058  | 3.68055489 |
| C | 9.98861905  | 3.70660659  | 2.51864300 |
| C | 7.84574267  | 0.15040524  | 7.52922295 |
| C | 6.19419186  | 6.44046288  | 4.04348750 |
| C | 8.92704608  | -0.06198492 | 6.63363754 |
| C | 7.27549527  | 6.22807272  | 3.14790209 |
| H | 4.30260434  | 2.83490324  | 8.84593842 |
| H | 3.75208737  | 4.93158925  | 7.68402653 |
| H | 11.36915057 | 1.44688871  | 2.99309851 |
| H | 10.81863360 | 3.54357472  | 1.83118662 |
| H | 7.64202534  | -0.57279290 | 8.31889628 |
| H | 9.55334339  | -0.94821494 | 6.73585441 |

|   |             |             |             |
|---|-------------|-------------|-------------|
| H | 5.56789455  | 7.32669290  | 3.94127063  |
| H | 7.47921260  | 6.95127086  | 2.35822876  |
| H | 5.74481169  | 0.79413535  | 9.08131850  |
| H | 10.90004006 | -0.21845717 | 4.81152031  |
| H | 4.22119788  | 6.59693513  | 5.86560473  |
| H | 9.37642625  | 5.58434261  | 1.59580654  |
| C | 0.48810939  | -6.30157800 | -1.25742038 |
| C | 1.01768141  | -5.35268730 | -3.88130289 |
| C | 1.82531877  | -6.22844880 | -1.72956789 |
| C | -0.58431398 | -5.90026184 | -2.09721413 |
| C | 2.09010478  | -5.75400345 | -3.04150915 |
| C | -0.31952797 | -5.42581650 | -3.40915538 |
| C | 0.22332338  | -6.77602335 | 0.05452087  |
| C | 2.89774214  | -6.62976496 | -0.88977414 |
| C | -1.92152336 | -5.97339104 | -1.62506662 |
| C | 1.28246742  | -4.87824195 | -5.19324415 |
| C | 3.42731416  | -5.68087426 | -3.51365666 |
| C | -1.39195134 | -5.02450034 | -4.24894913 |
| C | 2.63295613  | -7.10421031 | 0.42216711  |
| C | -2.18630937 | -6.44783639 | -0.31312536 |
| C | 3.69210017  | -5.20642891 | -4.82559791 |
| C | -1.12716533 | -4.55005499 | -5.56089039 |
| C | 1.29574674  | -7.17733952 | 0.89431468  |
| C | -1.11388601 | -6.84915256 | 0.52666844  |
| C | 2.61967682  | -4.80511274 | -5.66539171 |
| C | 0.21004407  | -4.47692578 | -6.03303795 |
| C | 4.23495129  | -6.55663573 | -1.36192169 |

|   |             |             |             |
|---|-------------|-------------|-------------|
| C | -2.99394649 | -5.57207492 | -2.46486033 |
| C | 4.49973730  | -6.08219038 | -2.67386294 |
| C | -2.72916048 | -5.09762957 | -3.77680158 |
| H | 1.09249552  | -7.54152643 | 1.90136813  |
| H | -1.31713723 | -7.21333947 | 1.53372189  |
| H | 2.82292804  | -4.44092583 | -6.67244516 |
| H | 0.41329529  | -4.11273887 | -7.04009140 |
| H | 5.05814960  | -6.86468830 | -0.71729123 |
| H | 5.52618685  | -6.02605600 | -3.03628605 |
| H | -4.02039605 | -5.62820930 | -2.10243722 |
| H | -3.55235879 | -4.78957700 | -4.42143204 |
| H | 3.45615420  | -7.41226286 | 1.06679759  |
| H | 4.71854951  | -5.15029448 | -5.18802111 |
| H | -3.21275870 | -6.50397082 | 0.04929783  |
| H | -1.95036339 | -4.24200244 | -6.20552086 |
| C | 0.68312447  | 4.22750743  | 1.02167701  |
| C | -1.52029058 | 3.83959981  | -0.72763409 |
| C | -0.56557659 | 4.84103983  | 1.30579624  |
| C | 0.83011801  | 3.42002122  | -0.13709778 |
| C | -1.66728411 | 4.64708602  | 0.43114069  |
| C | -0.27158952 | 3.22606741  | -1.01175333 |
| C | 1.78483200  | 4.42146124  | 1.89633256  |
| C | -0.71257012 | 5.64852604  | 2.46457103  |
| C | 2.07881906  | 2.80648882  | -0.42121701 |
| C | -2.62199810 | 3.64564600  | -1.60228964 |
| C | -2.91598517 | 5.26061842  | 0.71525993  |
| C | -0.12459598 | 2.41858120  | -2.17052811 |

|   |             |             |             |
|---|-------------|-------------|-------------|
| C | 0.38913741  | 5.84247985  | 3.33922658  |
| C | 3.18052659  | 3.00044263  | 0.45343854  |
| C | -4.01769269 | 5.06666461  | -0.15939562 |
| C | -1.22630351 | 2.22462739  | -3.04518366 |
| C | 1.63783851  | 5.22894746  | 3.05510738  |
| C | 3.03353310  | 3.80792885  | 1.61221336  |
| C | -3.87069920 | 4.25917840  | -1.31817044 |
| C | -2.47500461 | 2.83815979  | -2.76106446 |
| C | -1.96127104 | 6.26205830  | 2.74869012  |
| C | 2.22581246  | 1.99900275  | -1.57999165 |
| C | -3.06297856 | 6.06810449  | 1.87403457  |
| C | 1.12410494  | 1.80504894  | -2.45464720 |
| H | 2.48351537  | 5.37782748  | 3.72649787  |
| H | 3.87920996  | 3.95680887  | 2.28360385  |
| H | -4.71637606 | 4.11029837  | -1.98956094 |
| H | -3.32068147 | 2.68927976  | -3.43245496 |
| H | -2.07410413 | 6.88188933  | 3.63817225  |
| H | -4.02148861 | 6.53905547  | 2.09212613  |
| H | 3.18432251  | 1.52805177  | -1.79808321 |
| H | 1.23693803  | 1.18521791  | -3.34412933 |
| H | 0.27630449  | 6.46231074  | 4.22870860  |
| H | -4.97620265 | 5.53761545  | 0.05869576  |
| H | 4.13903654  | 2.52949180  | 0.23534716  |
| H | -1.11347060 | 1.60479650  | -3.93466568 |
| C | -1.32273853 | 0.08625013  | 10.74992577 |
| C | 1.06186141  | 1.62063215  | 10.90789562 |
| C | -0.10289822 | -0.53433974 | 11.12842002 |

|   |             |             |             |
|---|-------------|-------------|-------------|
| C | -1.35027888 | 1.47403101  | 10.45041644 |
| C | 1.08940175  | 0.23285127  | 11.20740495 |
| C | -0.15797891 | 2.24122202  | 10.52940137 |
| C | -2.51503850 | -0.68094087 | 10.67094084 |
| C | -0.07535788 | -1.92212062 | 11.42792935 |
| C | -2.57011919 | 2.09462088  | 10.07192219 |
| C | 2.25416138  | 2.38782315  | 10.98688055 |
| C | 2.30924206  | -0.38773860 | 11.58589920 |
| C | -0.18551925 | 3.62900290  | 10.22989204 |
| C | -1.26765785 | -2.68931163 | 11.34894443 |
| C | -3.76241916 | 1.32742988  | 9.99293726  |
| C | 3.50154203  | 0.37945240  | 11.66488413 |
| C | 1.00678072  | 4.39619391  | 10.30887697 |
| C | -2.48749821 | -2.06872179 | 10.97045017 |
| C | -3.73487887 | -0.06035103 | 10.29244659 |
| C | 3.47400174  | 1.76723331  | 11.36537481 |
| C | 2.22662108  | 3.77560407  | 10.68737122 |
| C | 1.14448231  | -2.54271030 | 11.80642354 |
| C | -2.59765941 | 3.48240157  | 9.77241293  |
| C | 2.33678228  | -1.77551929 | 11.88540847 |
| C | -1.40535944 | 4.24959258  | 9.85139785  |
| H | -3.40271434 | -2.65762190 | 10.90982090 |
| H | -4.65009500 | -0.64925115 | 10.23181732 |
| H | 4.38921787  | 2.35613343  | 11.42600408 |
| H | 3.14183721  | 4.36450418  | 10.74800049 |
| H | 1.16562245  | -3.60797881 | 12.03632861 |
| H | 3.27313865  | -2.25188763 | 12.17594282 |

|   |             |             |             |
|---|-------------|-------------|-------------|
| H | -3.53401578 | 3.95876991  | 9.48187858  |
| H | -1.42649958 | 5.31486109  | 9.62149278  |
| H | -1.24651788 | -3.75457998 | 11.57884943 |
| H | 4.43789833  | -0.09691571 | 11.95541842 |
| H | -4.69877546 | 1.80379799  | 9.70240297  |
| H | 0.98564075  | 5.46146226  | 10.07897196 |
| C | 2.71901688  | 12.37203256 | 7.37038187  |
| C | 0.02871320  | 12.50625356 | 6.47046504  |
| C | 1.65637362  | 12.06433321 | 8.26061246  |
| C | 2.43650830  | 12.74684241 | 6.03019287  |
| C | 0.31122178  | 12.13144372 | 7.81065404  |
| C | 1.09135646  | 12.81395291 | 5.58023446  |
| C | 4.06416873  | 12.30492205 | 7.82034029  |
| C | 1.93888221  | 11.68952336 | 9.60080146  |
| C | 3.49915156  | 13.05454175 | 5.13996229  |
| C | -1.31643865 | 12.57336407 | 6.02050662  |
| C | -0.75142148 | 11.82374437 | 8.70088462  |
| C | 0.80884788  | 13.18876276 | 4.24004546  |
| C | 3.28403405  | 11.62241286 | 10.05075987 |
| C | 4.84430341  | 12.98743125 | 5.58992071  |
| C | -2.09657332 | 11.89085487 | 8.25092620  |
| C | -0.53630397 | 13.25587326 | 3.79008704  |
| C | 4.34667737  | 11.93011220 | 9.16052931  |
| C | 5.12681204  | 12.61262139 | 6.93010973  |
| C | -2.37908196 | 12.26566473 | 6.91073718  |
| C | -1.59894728 | 12.94817392 | 4.68031760  |
| C | 0.87623902  | 11.38182408 | 10.49103182 |

|   |             |             |             |
|---|-------------|-------------|-------------|
| C | 3.21664291  | 13.42935153 | 3.79977351  |
| C | -0.46891282 | 11.44893459 | 10.04107340 |
| C | 1.87149106  | 13.49646204 | 3.34981509  |
| H | 5.37922345  | 11.87859780 | 9.50591991  |
| H | 6.15935813  | 12.56110700 | 7.27550033  |
| H | -3.41162805 | 12.31717912 | 6.56534659  |
| H | -2.63149337 | 12.99968832 | 4.33492700  |
| H | 1.09309420  | 11.09411790 | 11.51976855 |
| H | -1.28460384 | 11.21274281 | 10.72441949 |
| H | 4.03233392  | 13.66554331 | 3.11642742  |
| H | 1.65463588  | 13.78416822 | 2.32107837  |
| H | 3.50088936  | 11.33470674 | 11.07949640 |
| H | -2.91226432 | 11.65466317 | 8.93427205  |
| H | 5.65999440  | 13.22362295 | 4.90657486  |
| H | -0.75315928 | 13.54357938 | 2.76135051  |
| C | -0.95586304 | -1.17806402 | 3.70543776  |
| C | -3.63821451 | -1.91562217 | 3.13395014  |
| C | -1.35631717 | -2.53642673 | 3.80978005  |
| C | -1.89658465 | -0.18848039 | 3.31535166  |
| C | -2.69749291 | -2.90520581 | 3.52403624  |
| C | -3.23776038 | -0.55725946 | 3.02960785  |
| C | 0.38531269  | -0.80928495 | 3.99118156  |
| C | -0.41559557 | -3.52601037 | 4.19986615  |
| C | -1.49613052 | 1.16988232  | 3.21100936  |
| C | -4.97939024 | -2.28440125 | 2.84820633  |
| C | -3.09794703 | -4.26356852 | 3.62837853  |
| C | -4.17848199 | 0.43232418  | 2.63952175  |



|   |             |             |            |
|---|-------------|-------------|------------|
| C | 0.92558017  | -3.15723129 | 4.48560996 |
| C | -0.15495479 | 1.53866140  | 3.49675317 |
| C | -4.43912277 | -4.63234759 | 3.34263472 |
| C | -5.51965772 | 0.06354510  | 2.35377794 |
| C | 1.32603435  | -1.79886857 | 4.38126768 |
| C | 0.78576687  | 0.54907778  | 3.88683928 |
| C | -5.37984443 | -3.64276397 | 2.95254861 |
| C | -5.92011191 | -1.29481763 | 2.45812022 |
| C | -0.81604975 | -4.88437285 | 4.30420839 |
| C | -2.43685207 | 2.15946573  | 2.82092331 |
| C | -2.15722548 | -5.25315193 | 4.01846458 |
| C | -3.77802781 | 1.79068666  | 2.53517950 |
| H | 2.35552835  | -1.51579169 | 4.60060622 |
| H | 1.81526087  | 0.83215466  | 4.10617783 |
| H | -6.40933843 | -3.92584085 | 2.73321007 |
| H | -6.94960591 | -1.57789451 | 2.23878167 |
| H | -0.09394649 | -5.64398291 | 4.60364071 |
| H | -2.46461634 | -6.29583890 | 4.09855833 |
| H | -2.12946122 | 3.20215270  | 2.74082957 |
| H | -4.50013106 | 2.55029672  | 2.23574719 |
| H | 1.64768343  | -3.91684111 | 4.78504223 |
| H | -4.74651373 | -5.67503435 | 3.42272841 |
| H | 0.15243618  | 2.58134816  | 3.41665949 |
| H | -6.24176098 | 0.82315491  | 2.05434566 |
| C | -1.73353527 | 8.73230794  | 6.55114751 |
| C | 0.12540156  | 9.35990663  | 4.49783962 |
| C | -0.33913381 | 8.66560554  | 6.81113872 |

|   |             |             |            |
|---|-------------|-------------|------------|
| C | -2.19846831 | 9.11280969  | 5.26450235 |
| C | 0.59033461  | 8.97940488  | 5.78448478 |
| C | -1.26899990 | 9.42660904  | 4.23784841 |
| C | -2.66300368 | 8.41850860  | 7.57780145 |
| C | 0.12579924  | 8.28510378  | 8.09778387 |
| C | -3.59286977 | 9.17951210  | 5.00451114 |
| C | 1.05486998  | 9.67370597  | 3.47118568 |
| C | 1.98473607  | 8.91270247  | 6.04447599 |
| C | -1.73393295 | 9.80711079  | 2.95120325 |
| C | -0.80366917 | 7.97130444  | 9.12443782 |
| C | -4.52233819 | 8.86571276  | 6.03116508 |
| C | 2.91420448  | 9.22650181  | 5.01782205 |
| C | -0.80446453 | 10.12091013 | 1.92454931 |
| C | -2.19807067 | 8.03800684  | 8.86444665 |
| C | -4.05740518 | 8.48521099  | 7.31781028 |
| C | 2.44927148  | 9.60700358  | 3.73117685 |
| C | 0.58993697  | 10.05420774 | 2.18454048 |
| C | 1.52020052  | 8.21840142  | 8.35777494 |
| C | -4.05780264 | 9.56001381  | 3.71786613 |
| C | 2.44966894  | 8.53220076  | 7.33112100 |
| C | -3.12833423 | 9.87381315  | 2.69121219 |
| H | -2.91153583 | 7.79713270  | 9.65251196 |
| H | -4.77087034 | 8.24433686  | 8.10587559 |
| H | 3.16273663  | 9.84787771  | 2.94311154 |
| H | 1.30340213  | 10.29508187 | 1.39647517 |
| H | 1.87708580  | 7.92632611  | 9.34541109 |
| H | 3.52001945  | 8.48099961  | 7.53069175 |

|   |             |             |             |
|---|-------------|-------------|-------------|
| H | -5.12815315 | 9.61121496  | 3.51829537  |
| H | -3.48521950 | 10.16588846 | 1.70357603  |
| H | -0.44678412 | 7.67922916  | 10.11207386 |
| H | 3.98455485  | 9.17530072  | 5.21739261  |
| H | -5.59268856 | 8.91691385  | 5.83159451  |
| H | -1.16134959 | 10.41298541 | 0.93691326  |
| C | 6.81635992  | 7.99671199  | -2.49204074 |
| C | 5.74371634  | 9.72209969  | -0.50758299 |
| C | 7.57191333  | 8.29569643  | -1.32750331 |
| C | 5.52448471  | 8.56042140  | -2.66434929 |
| C | 7.03559155  | 9.15839028  | -0.33527444 |
| C | 4.98816292  | 9.42311525  | -1.67212041 |
| C | 7.35268171  | 7.13401814  | -3.48426961 |
| C | 8.86378854  | 7.73198703  | -1.15519476 |
| C | 4.76893130  | 8.26143696  | -3.82888671 |
| C | 5.20739455  | 10.58479353 | 0.48464589  |
| C | 7.79114496  | 9.45737472  | 0.82926299  |
| C | 3.69628772  | 9.98682465  | -1.84442896 |
| C | 9.40011033  | 6.86929318  | -2.14742364 |
| C | 5.30525309  | 7.39874311  | -4.82111559 |
| C | 7.25482317  | 10.32006857 | 1.82149186  |
| C | 3.15996593  | 10.84951850 | -0.85220009 |
| C | 8.64455694  | 6.57030870  | -3.31196111 |
| C | 6.59712831  | 6.83503367  | -4.64880708 |
| C | 5.96294794  | 10.88377801 | 1.64918336  |
| C | 3.91551932  | 11.14850298 | 0.31233738  |
| C | 9.61934176  | 8.03097149  | 0.00934253  |

|   |             |             |             |
|---|-------------|-------------|-------------|
| C | 3.47705629  | 8.82514634  | -4.00119513 |
| C | 9.08301997  | 8.89366534  | 1.00157141  |
| C | 2.94073450  | 9.68784018  | -3.00896626 |
| H | 9.05624054  | 5.90810008  | -4.07360154 |
| H | 7.00881192  | 6.17282504  | -5.41044752 |
| H | 5.55126434  | 11.54598664 | 2.41082379  |
| H | 3.50383572  | 11.81071160 | 1.07397782  |
| H | 10.61099254 | 7.59826495  | 0.14160757  |
| H | 9.66298709  | 9.12316749  | 1.89547697  |
| H | 2.89708916  | 8.59564419  | -4.89510070 |
| H | 1.94908372  | 10.12054673 | -3.14123130 |
| H | 10.39176093 | 6.43658662  | -2.01515877 |
| H | 7.83479008  | 10.54957078 | 2.71539734  |
| H | 4.72528618  | 7.16924090  | -5.71502107 |
| H | 2.16831533  | 11.28222506 | -0.98446496 |
| C | 7.83912840  | -0.74536270 | 2.38299390  |
| C | 7.01770844  | -2.50197660 | 4.45788579  |
| C | 6.77913153  | -0.37221350 | 3.25107593  |
| C | 8.48841529  | -1.99681884 | 2.55235782  |
| C | 6.36842155  | -1.25052045 | 4.28852187  |
| C | 8.07770530  | -2.87512579 | 3.58980377  |
| C | 8.24983838  | 0.13294426  | 1.34554796  |
| C | 6.12984465  | 0.87924264  | 3.08171201  |
| C | 9.54841215  | -2.36996803 | 1.68427580  |
| C | 6.60699846  | -3.38028355 | 5.49533174  |
| C | 5.30842469  | -0.87737126 | 5.15660390  |
| C | 8.72699219  | -4.12658194 | 3.75916769  |

|   |             |             |             |
|---|-------------|-------------|-------------|
| C | 6.54055463  | 1.75754959  | 2.04426606  |
| C | 9.95912213  | -1.49166108 | 0.64682985  |
| C | 4.89771471  | -1.75567821 | 6.19404984  |
| C | 8.31628221  | -5.00488889 | 4.79661363  |
| C | 7.60055151  | 1.38440044  | 1.17618400  |
| C | 9.30983526  | -0.24020490 | 0.47746589  |
| C | 5.54700158  | -3.00713440 | 6.36341381  |
| C | 7.25628533  | -4.63173973 | 5.66469570  |
| C | 5.06984795  | 1.25239168  | 3.94979397  |
| C | 10.19769887 | -3.62142402 | 1.85363979  |
| C | 4.65913797  | 0.37408472  | 4.98723991  |
| C | 9.78698889  | -4.49973097 | 2.89108573  |
| H | 7.91581479  | 2.05859377  | 0.37983468  |
| H | 9.62509854  | 0.43398843  | -0.31888342 |
| H | 5.23173830  | -3.68132773 | 7.15976312  |
| H | 6.94102205  | -5.30593306 | 6.46104502  |
| H | 4.57145162  | 2.21301655  | 3.81978927  |
| H | 3.84547833  | 0.66051619  | 5.65358462  |
| H | 11.01135851 | -3.90785548 | 1.18729508  |
| H | 10.28538522 | -5.46035584 | 3.02109043  |
| H | 6.04215849  | 2.71817434  | 1.91426126  |
| H | 4.08405521  | -1.46924694 | 6.86039452  |
| H | 10.77278162 | -1.77809235 | -0.01951483 |
| H | 8.81467835  | -5.96551364 | 4.92661844  |
| C | 0.09305173  | 5.75455117  | 13.48174671 |
| C | 1.46196106  | 3.40269294  | 14.29442722 |
| C | -0.61421593 | 4.52995532  | 13.61034502 |

|   |             |            |             |
|---|-------------|------------|-------------|
| C | 1.48477406  | 5.80321791 | 13.75948864 |
| C | 0.07023873  | 3.35402621 | 14.01668528 |
| C | 2.16922873  | 4.62728879 | 14.16582890 |
| C | -0.59140293 | 6.93048029 | 13.07540645 |
| C | -2.00593826 | 4.48128859 | 13.33260309 |
| C | 2.19204173  | 7.02781376 | 13.63089033 |
| C | 2.14641573  | 2.22676383 | 14.70076747 |
| C | -0.63702893 | 2.12943035 | 14.14528360 |
| C | 3.56095106  | 4.67595553 | 14.44357084 |
| C | -2.69039292 | 5.65721770 | 12.92626283 |
| C | 1.50758706  | 8.20374288 | 13.22455007 |
| C | 0.04742574  | 0.95350124 | 14.55162385 |
| C | 4.24540572  | 3.50002641 | 14.84991109 |
| C | -1.98312529 | 6.88181360 | 12.79766449 |
| C | 0.11586470  | 8.15507619 | 12.94680811 |
| C | 1.43914809  | 1.00216792 | 14.82936581 |
| C | 3.53813809  | 2.27543051 | 14.97850943 |
| C | -2.71320572 | 3.25669286 | 13.46120142 |
| C | 3.58376385  | 7.07648037 | 13.90863225 |
| C | -2.02875105 | 2.08076374 | 13.86754167 |
| C | 4.26821852  | 5.90055126 | 14.31497251 |
| H | -2.50851652 | 7.78446337 | 12.48575544 |
| H | -0.40952653 | 9.05772596 | 12.63489906 |
| H | 1.96453932  | 0.09951815 | 15.14127486 |
| H | 4.06352932  | 1.37278074 | 15.29041848 |
| H | -3.78149972 | 3.21933597 | 13.24800513 |
| H | -2.57165376 | 1.14075699 | 13.96625447 |

|   |             |             |             |
|---|-------------|-------------|-------------|
| H | 4.12666656  | 8.01648713  | 13.80991945 |
| H | 5.33651252  | 5.93790814  | 14.52816880 |
| H | -3.75868675 | 5.61986099  | 12.71306653 |
| H | -0.49547674 | 0.01349456  | 14.65033668 |
| H | 2.05048954  | 9.14374956  | 13.12583724 |
| H | 5.31369955  | 3.53738312  | 15.06310739 |
| C | -0.25448910 | -1.13065956 | -4.34798969 |
| C | -1.03191524 | -2.18647056 | -1.82876932 |
| C | 0.72657621  | -1.65026506 | -3.46259653 |
| C | -1.62426748 | -1.13895956 | -3.97377267 |
| C | 0.33786314  | -2.17817056 | -2.20298634 |
| C | -2.01298055 | -1.66686506 | -2.71416249 |
| C | 0.13422396  | -0.60275406 | -5.60759987 |
| C | 2.09635459  | -1.64196506 | -3.83681355 |
| C | -2.60533279 | -0.61935406 | -4.85916583 |
| C | -1.42062830 | -2.71437606 | -0.56915914 |
| C | 1.31892845  | -2.69777606 | -1.31759318 |
| C | -3.38275893 | -1.67516506 | -2.33994547 |
| C | 2.48506766  | -1.11405956 | -5.09642373 |
| C | -2.21661973 | -0.09144856 | -6.11877602 |
| C | 0.93021539  | -3.22568156 | -0.05798300 |
| C | -3.77147200 | -2.20307056 | -1.08033528 |
| C | 1.50400236  | -0.59445404 | -5.98181694 |
| C | -0.84684133 | -0.08314854 | -6.49299309 |
| C | -0.43956301 | -3.23398159 | 0.31623407  |
| C | -2.79040670 | -2.72267608 | -0.19494207 |
| C | 3.07741967  | -2.16157051 | -2.95142043 |

|   |             |             |             |
|---|-------------|-------------|-------------|
| C | -3.97511095 | -0.62765411 | -4.48494876 |
| C | 2.68870661  | -2.68947601 | -1.69181025 |
| C | -4.36382401 | -1.15555961 | -3.22533858 |
| H | 1.80238069  | -0.18923082 | -6.94870077 |
| H | -0.54846301 | 0.32207468  | -7.45987691 |
| H | -0.73794133 | -3.63920480 | 1.28311790  |
| H | -3.08878503 | -3.12789930 | 0.77194176  |
| H | 4.12886937  | -2.15519940 | -3.23867153 |
| H | 3.44177795  | -3.08832816 | -1.01217742 |
| H | -4.72818229 | -0.22880197 | -5.16458159 |
| H | -5.41527372 | -1.16193073 | -2.93808748 |
| H | 3.53651715  | -1.10768837 | -5.38367493 |
| H | 1.68328649  | -3.62453368 | 0.62164983  |
| H | -2.96969083 | 0.30740356  | -6.79840885 |
| H | -4.82292149 | -2.20944175 | -0.79308408 |
| C | 8.28267139  | 4.76291179  | 9.19686604  |
| C | 8.30977395  | 6.95430097  | 7.39057747  |
| C | 9.24876159  | 4.81433892  | 8.15743107  |
| C | 7.33013247  | 5.80717925  | 9.33315672  |
| C | 9.26231287  | 5.91003351  | 7.25428679  |
| C | 7.34368375  | 6.90287384  | 8.43001244  |
| C | 8.26912011  | 3.66721719  | 10.10001033 |
| C | 10.20130051 | 3.77007146  | 8.02114039  |
| C | 6.36404227  | 5.75575211  | 10.37259169 |
| C | 8.32332522  | 8.04999556  | 6.48743318  |
| C | 10.22840307 | 5.96146065  | 6.21485182  |
| C | 6.39114482  | 7.94714130  | 8.56630312  |



|   |             |            |             |
|---|-------------|------------|-------------|
| C | 10.18774924 | 2.67437687 | 8.92428468  |
| C | 6.35049099  | 4.66005752 | 11.27573598 |
| C | 10.24195435 | 7.05715524 | 5.31170753  |
| C | 6.40469610  | 9.04283589 | 7.66315883  |
| C | 9.22165904  | 2.62294969 | 9.96371968  |
| C | 7.30302991  | 3.61579001 | 11.13944533 |
| C | 9.28941542  | 8.10142274 | 5.44799818  |
| C | 7.37078630  | 9.09426307 | 6.62372383  |
| C | 11.16739053 | 3.82149869 | 6.98170554  |
| C | 5.41150353  | 6.80001948 | 10.50888226 |
| C | 11.18094181 | 4.91719328 | 6.07856125  |
| C | 5.42505481  | 7.89571407 | 9.60573797  |
| H | 9.21125700  | 1.78188839 | 10.65697829 |
| H | 7.29262788  | 2.77472871 | 11.83270394 |
| H | 9.29981746  | 8.94248405 | 4.75473957  |
| H | 7.38118834  | 9.93532437 | 5.93046522  |
| H | 11.89856485 | 3.01991304 | 6.87708802  |
| H | 11.92251816 | 4.95666903 | 5.28068505  |
| H | 4.66992718  | 6.76054373 | 11.30675846 |
| H | 4.69388049  | 8.69729972 | 9.71035549  |
| H | 10.91892337 | 1.87279127 | 8.81966731  |
| H | 10.98353052 | 7.09663112 | 4.51383141  |
| H | 5.60891482  | 4.62058163 | 12.07361210 |
| H | 5.67352197  | 9.84442149 | 7.76777620  |
| C | 2.26787031  | 4.76170918 | -3.81976771 |
| C | 3.95180956  | 5.44691824 | -1.63792522 |
| C | 3.57357648  | 4.21077419 | -3.73031321 |

|   |             |            |             |
|---|-------------|------------|-------------|
| C | 1.80413376  | 5.65524869 | -2.81830098 |
| C | 4.41554611  | 4.55337872 | -2.63939196 |
| C | 2.64610339  | 5.99785322 | -1.72737973 |
| C | 1.42590068  | 4.41910465 | -4.91068896 |
| C | 4.03731303  | 3.31723467 | -4.73177994 |
| C | 0.49842759  | 6.20618368 | -2.90775548 |
| C | 4.79377919  | 5.78952277 | -0.54700398 |
| C | 5.72125228  | 4.00244373 | -2.54993745 |
| C | 2.18236684  | 6.89139274 | -0.72591299 |
| C | 3.19534340  | 2.97463014 | -5.82270119 |
| C | -0.34354204 | 5.86357915 | -3.99867673 |
| C | 6.56322191  | 4.34504826 | -1.45901621 |
| C | 3.02433647  | 7.23399727 | 0.36500825  |
| C | 1.88963719  | 3.52556512 | -5.91215574 |
| C | 0.12019447  | 4.97003962 | -5.00014351 |
| C | 6.09948540  | 5.23858779 | -0.45754943 |
| C | 4.33004268  | 6.68306230 | 0.45446280  |
| C | 5.34301903  | 2.76629983 | -4.64232535 |
| C | 0.03469122  | 7.09972305 | -1.90628883 |
| C | 6.18498866  | 3.10890436 | -3.55140410 |
| C | 0.87666084  | 7.44232758 | -0.81536759 |
| H | 1.24333660  | 3.26257996 | -6.74955300 |
| H | -0.52610612 | 4.70705446 | -5.83754077 |
| H | 6.74578599  | 5.50157295 | 0.37984783  |
| H | 4.97634327  | 6.94604745 | 1.29186006  |
| H | 5.69898586  | 2.08041380 | -5.41105692 |
| H | 7.18725616  | 2.68600351 | -3.48273833 |

|    |             |            |             |
|----|-------------|------------|-------------|
| H  | -0.96757629 | 7.52262390 | -1.97495461 |
| H  | 0.52069401  | 8.12821361 | -0.04663602 |
| H  | 3.55131003  | 2.28874424 | -6.59143272 |
| H  | 7.56548927  | 3.92214757 | -1.39035030 |
| H  | -1.34580940 | 6.28647984 | -4.06734264 |
| H  | 2.66836984  | 7.91988317 | 1.13373978  |
| Cs | 0.20465800  | 0.10074000 | 0.48149700  |

**Structures in Fig. 7** Values in parenthesis are the energies of the structures when the reference is the global minimum (*cf.* Fig. 7).

73

n = 2, Energy = -187.969101870334 (33.1)

|   |            |             |             |
|---|------------|-------------|-------------|
| C | 2.55720023 | 2.49344583  | -0.03607747 |
| C | 2.10431405 | 1.83144311  | 2.68830246  |
| C | 1.58248352 | 3.20276784  | 0.71438219  |
| C | 3.30547385 | 1.45312246  | 0.57565283  |
| C | 1.35604043 | 2.87176648  | 2.07657216  |
| C | 3.07903075 | 1.12212110  | 1.93784280  |
| C | 2.78364332 | 2.82444719  | -1.39826744 |
| C | 0.83420991 | 4.24309121  | 0.10265189  |
| C | 4.28019055 | 0.74380045  | -0.17480683 |
| C | 1.87787096 | 1.50044175  | 4.05049243  |
| C | 0.38132373 | 3.58108849  | 2.82703182  |
| C | 3.82730437 | 0.08179773  | 2.54957310  |
| C | 1.06065300 | 4.57409257  | -1.25953808 |
| C | 4.50663364 | 1.07480181  | -1.53699680 |
| C | 0.15488064 | 3.25008713  | 4.18922179  |
| C | 3.60086128 | -0.24920363 | 3.91176307  |

|   |             |             |             |
|---|-------------|-------------|-------------|
| C | 2.03536972  | 3.86477057  | -2.00999780 |
| C | 3.75836004  | 2.11512519  | -2.14872716 |
| C | 0.90315424  | 2.20976374  | 4.80095215  |
| C | 2.62614456  | 0.46011837  | 4.66222279  |
| C | -0.14050663 | 4.95241304  | 0.85311154  |
| C | 5.02846400  | -0.29652275 | 0.43692348  |
| C | -0.36694972 | 4.62141169  | 2.21530151  |
| C | 4.80202091  | -0.62752411 | 1.79911345  |
| H | 2.20918870  | 4.11884907  | -3.05562244 |
| H | 3.93217902  | 2.36920369  | -3.19435180 |
| H | 0.72933526  | 1.95568525  | 5.84657679  |
| H | 2.45232558  | 0.20603987  | 5.70784743  |
| H | -0.71488573 | 5.75097120  | 0.38354389  |
| H | -1.11514783 | 5.16589132  | 2.79135861  |
| H | 5.77666211  | -0.84100238 | -0.13913362 |
| H | 5.37640001  | -1.42608226 | 2.26868110  |
| H | 0.48627407  | 5.37265056  | -1.72910580 |
| H | -0.59331731 | 3.79456657  | 4.76527894  |
| H | 5.25483159  | 0.53032236  | -2.11305395 |
| H | 4.17524021  | -1.04776163 | 4.38133079  |
| C | 5.39185674  | 3.45527891  | 3.58359606  |
| C | 4.78966520  | 5.03911204  | 1.30446520  |
| C | 6.08530412  | 3.23682263  | 2.36383885  |
| C | 4.39731359  | 4.46565175  | 3.66378784  |
| C | 5.78420835  | 4.02873920  | 1.22427342  |
| C | 4.09621782  | 5.25756831  | 2.52422241  |
| C | 5.69295251  | 2.66336234  | 4.72316149  |

|   |            |            |             |
|---|------------|------------|-------------|
| C | 7.07984727 | 2.22644979 | 2.28364706  |
| C | 3.70386621 | 4.68410802 | 4.88354506  |
| C | 4.48856944 | 5.83102860 | 0.16489977  |
| C | 6.47765574 | 3.81028292 | 0.00451620  |
| C | 3.10167467 | 6.26794115 | 2.60441420  |
| C | 7.38094304 | 1.43453323 | 3.42321249  |
| C | 4.00496198 | 3.89219146 | 6.02311049  |
| C | 6.17655997 | 4.60219949 | -1.13504923 |
| C | 2.80057890 | 7.05985772 | 1.46484877  |
| C | 6.68749567 | 1.65298947 | 4.64296975  |
| C | 4.99950514 | 2.88181858 | 5.94291875  |
| C | 5.18201680 | 5.61257236 | -1.05485749 |
| C | 3.49402627 | 6.84140148 | 0.24509151  |
| C | 7.77329449 | 2.00799363 | 1.06388997  |
| C | 2.70932323 | 5.69448074 | 4.96373672  |
| C | 7.47219872 | 2.79991020 | -0.07567546 |
| C | 2.40822746 | 6.48639731 | 3.82417129  |
| H | 6.91861847 | 1.04510988 | 5.51770656  |
| H | 5.23062794 | 2.27393900 | 6.81765555  |
| H | 4.95089401 | 6.22045195 | -1.92959429 |
| H | 3.26290348 | 7.44928106 | -0.62964530 |
| H | 8.53671149 | 1.23242568 | 1.00233428  |
| H | 8.00449290 | 2.63222190 | -1.01196804 |
| H | 2.17702905 | 5.86216904 | 5.90002930  |
| H | 1.64481046 | 7.26196526 | 3.88572698  |
| H | 8.14435989 | 0.65896536 | 3.36165698  |
| H | 6.70885397 | 4.43451134 | -2.07134174 |

|    |            |            |            |
|----|------------|------------|------------|
| H  | 3.47266798 | 4.05987960 | 6.95940300 |
| H  | 2.03716206 | 7.83542558 | 1.52640428 |
| Cs | 0.20465800 | 0.10074000 | 0.48149700 |

109

n = 3, Energy = -308.777741759207 (34.6)

|   |             |             |             |
|---|-------------|-------------|-------------|
| C | 1.68060746  | 2.86442580  | -0.65160748 |
| C | -0.19229348 | 1.74971290  | -2.47239212 |
| C | 2.10377739  | 1.89951230  | -1.60358921 |
| C | 0.32098705  | 3.27198285  | -0.61001807 |
| C | 1.16732693  | 1.34215585  | -2.51398153 |
| C | -0.61546342 | 2.71462640  | -1.52041039 |
| C | 2.61705793  | 3.42178225  | 0.25878485  |
| C | 3.46339780  | 1.49195525  | -1.64517862 |
| C | -0.10218289 | 4.23689635  | 0.34196366  |
| C | -1.12874395 | 1.19235645  | -3.38278445 |
| C | 1.59049686  | 0.37724235  | -3.46596326 |
| C | -1.97508383 | 3.12218345  | -1.47882098 |
| C | 4.39984827  | 2.04931170  | -0.73478629 |
| C | 0.83426758  | 4.79425280  | 1.25235599  |
| C | 0.65404639  | -0.18011410 | -4.37635559 |
| C | -2.91153429 | 2.56482699  | -2.38921331 |
| C | 3.97667837  | 3.01422522  | 0.21719548  |
| C | 2.19388803  | 4.38669577  | 1.21076662  |
| C | -0.70557405 | 0.22744292  | -4.33476622 |
| C | -2.48836440 | 1.59991347  | -3.34119508 |
| C | 3.88656757  | 0.52704188  | -2.59716025 |
| C | -1.46180312 | 4.64445326  | 0.38355298  |

|   |             |             |             |
|---|-------------|-------------|-------------|
| C | 2.95011710  | -0.03031457 | -3.50755258 |
| C | -2.39825359 | 4.08709681  | -0.52683935 |
| H | 4.69550299  | 3.44205516  | 0.91601772  |
| H | 2.91271265  | 4.81452570  | 1.90958886  |
| H | -1.42439867 | -0.20038701 | -5.03358846 |
| H | -3.20718902 | 1.17208354  | -4.04001732 |
| H | 4.93021994  | 0.21419876  | -2.62908453 |
| H | 3.27494477  | -0.77098767 | -4.23829918 |
| H | -1.78663080 | 5.38512637  | 1.11429958  |
| H | -3.44190596 | 4.39993994  | -0.49491507 |
| H | 5.44350051  | 1.73646873  | -0.76671044 |
| H | 0.97887386  | -0.92078710 | -5.10710213 |
| H | 0.50944012  | 5.53492579  | 1.98310253  |
| H | -3.95518654 | 2.87766997  | -2.35728916 |
| C | 1.91774233  | 3.90470329  | -4.93255572 |
| C | -0.14018485 | 5.48954626  | -3.78416206 |
| C | 2.21499509  | 4.78470276  | -3.85847853 |
| C | 0.59152598  | 3.81712531  | -5.43243608 |
| C | 1.18603150  | 5.57712424  | -3.28428170 |
| C | -0.43743760 | 4.60954680  | -4.85823925 |
| C | 2.94670592  | 3.11228181  | -5.50675255 |
| C | 3.54121144  | 4.87228074  | -3.35859816 |
| C | 0.29427323  | 2.93712585  | -6.50651328 |
| C | -1.16914843 | 6.28196775  | -3.20996523 |
| C | 1.48328426  | 6.45712371  | -2.21020450 |
| C | -1.76365395 | 4.52196882  | -5.35811961 |
| C | 4.57017502  | 4.07985925  | -3.93279500 |

|   |             |             |             |
|---|-------------|-------------|-------------|
| C | 1.32323682  | 2.14470437  | -7.08071011 |
| C | 0.45432067  | 7.24954519  | -1.63600767 |
| C | -2.79261754 | 5.31439031  | -4.78392278 |
| C | 4.27292231  | 3.19985975  | -5.00687221 |
| C | 2.64945320  | 2.23228231  | -6.58082977 |
| C | -0.87189572 | 7.16196725  | -2.13588801 |
| C | -2.49536482 | 6.19438981  | -3.70984557 |
| C | 3.83846404  | 5.75228011  | -2.28452112 |
| C | -1.03194296 | 2.84954797  | -7.00639349 |
| C | 2.80950045  | 6.54470159  | -1.71032429 |
| C | -2.06090655 | 3.64196945  | -6.43219666 |
| H | 5.06276052  | 2.59159259  | -5.44762891 |
| H | 3.43929141  | 1.62401514  | -7.02158647 |
| H | -1.66173393 | 7.77023442  | -1.69513131 |
| H | -3.28520303 | 6.80265697  | -3.26908886 |
| H | 4.85647526  | 5.81950548  | -1.90081009 |
| H | 3.03767338  | 7.22019419  | -0.88585651 |
| H | -1.26011589 | 2.17405536  | -7.83086127 |
| H | -3.07891778 | 3.57474408  | -6.81590769 |
| H | 5.58818614  | 4.14708449  | -3.54908414 |
| H | 0.68249340  | 7.92503774  | -0.81154002 |
| H | 1.09506409  | 1.46921182  | -7.90517776 |
| H | -3.81062865 | 5.24716507  | -5.16763364 |
| C | -2.59147805 | -1.82848192 | -0.30350286 |
| C | -1.00091524 | -2.64848548 | 1.90178706  |
| C | -1.51510036 | -2.73316719 | -0.50188565 |
| C | -2.87257432 | -1.33379843 | 0.99752489  |



|   |             |             |             |
|---|-------------|-------------|-------------|
| C | -0.71981896 | -3.14316897 | 0.60075931  |
| C | -2.07729292 | -1.74380021 | 2.10016985  |
| C | -3.38675945 | -1.41848015 | -1.40614782 |
| C | -1.23400409 | -3.22785068 | -1.80291340 |
| C | -3.94895201 | -0.42911317 | 1.19590768  |
| C | -0.20563383 | -3.05848725 | 3.00443202  |
| C | 0.35655872  | -4.04785423 | 0.40237652  |
| C | -2.35838919 | -1.24911672 | 3.40119760  |
| C | -2.02928549 | -2.81784890 | -2.90555836 |
| C | -4.74423341 | -0.01911139 | 0.09326272  |
| C | 1.15184013  | -4.45785601 | 1.50502148  |
| C | -1.56310779 | -1.65911850 | 4.50384256  |
| C | -3.10566321 | -1.91316362 | -2.70717562 |
| C | -4.46313717 | -0.51379486 | -1.20776508 |
| C | 0.87074389  | -3.96317254 | 2.80604927  |
| C | -0.48673007 | -2.56380378 | 4.30545981  |
| C | -0.15762654 | -4.13253581 | -2.00129605 |
| C | -4.23004815 | 0.06557019  | 2.49693528  |
| C | 0.63765487  | -4.54253758 | -0.89865109 |
| C | -3.43476675 | -0.34443159 | 3.59958024  |
| H | -3.71612567 | -1.59844396 | -3.55357206 |
| H | -5.07359963 | -0.19907521 | -2.05416152 |
| H | 1.48120634  | -4.27789219 | 3.65244571  |
| H | 0.12373239  | -2.87852344 | 5.15185625  |
| H | 0.05814458  | -4.51225769 | -2.99997236 |
| H | 1.46388851  | -5.23697916 | -1.05093087 |
| H | -5.05628180 | 0.76001176  | 2.64921506  |

|    |             |             |             |
|----|-------------|-------------|-------------|
| H  | -3.65053787 | 0.03529029  | 4.59825656  |
| H  | -1.81351454 | -3.19757063 | -3.90423458 |
| H  | 1.97807368  | -5.15229746 | 1.35274189  |
| H  | -5.57046696 | 0.67533006  | 0.24554231  |
| H  | -1.77887874 | -1.27939677 | 5.50251877  |
| Cs | 0.20465800  | 0.10074000  | 0.48149700  |

109

n = 3, Energy = -285.528940533242 (57.9)

|   |            |             |             |
|---|------------|-------------|-------------|
| C | 3.77997520 | 1.39313950  | -0.75862050 |
| C | 3.74260982 | 1.25270436  | 2.07765898  |
| C | 4.74516226 | 0.60836082  | -0.07383116 |
| C | 2.79610545 | 2.10770061  | -0.02527010 |
| C | 4.72647957 | 0.53814325  | 1.34430858  |
| C | 2.77742276 | 2.03748304  | 1.39286964  |
| C | 3.79865789 | 1.46335706  | -2.17676024 |
| C | 5.72903201 | -0.10620029 | -0.80718156 |
| C | 1.83091839 | 2.89247929  | -0.71005944 |
| C | 3.72392713 | 1.18248679  | 3.49579873  |
| C | 5.69166663 | -0.24663543 | 2.02909792  |
| C | 1.79355301 | 2.75204415  | 2.12622004  |
| C | 5.74771470 | -0.03598273 | -2.22532130 |
| C | 1.84960108 | 2.96269685  | -2.12819918 |
| C | 5.67298394 | -0.31685300 | 3.44723767  |
| C | 1.77487032 | 2.68182658  | 3.54435979  |
| C | 4.78252764 | 0.74879596  | -2.91011070 |
| C | 2.83347083 | 2.24813575  | -2.86154964 |
| C | 4.68911419 | 0.39770811  | 4.18058813  |

|   |             |             |             |
|---|-------------|-------------|-------------|
| C | 2.74005738  | 1.89704790  | 4.22914919  |
| C | 6.69421888  | -0.89097883 | -0.12239221 |
| C | 0.84704883  | 3.60704025  | 0.02329096  |
| C | 6.67553619  | -0.96119640 | 1.29574753  |
| C | 0.82836614  | 3.53682269  | 1.44143070  |
| H | 4.79686858  | 0.80269535  | -3.99868271 |
| H | 2.84781177  | 2.30203514  | -3.95012165 |
| H | 4.67477325  | 0.34380871  | 5.26916013  |
| H | 2.72571645  | 1.84314850  | 5.31772119  |
| H | 7.44944292  | -1.43948002 | -0.68531615 |
| H | 7.41641929  | -1.56359699 | 1.82139572  |
| H | 0.10616573  | 4.20944085  | -0.50235723 |
| H | 0.07314210  | 4.08532388  | 2.00435463  |
| H | 6.50293855  | -0.58448377 | -2.78824529 |
| H | 6.41386685  | -0.91925345 | 3.97288592  |
| H | 1.10871817  | 3.56509731  | -2.65384743 |
| H | 1.01964647  | 3.23032763  | 4.10728378  |
| C | -0.54015289 | -3.46619512 | -1.16571700 |
| C | -0.64079489 | -3.67779408 | 1.66460040  |
| C | -1.42638691 | -2.64180946 | -0.42316895 |
| C | 0.29576013  | -4.39638027 | -0.49310634 |
| C | -1.47670791 | -2.74760893 | 0.99198975  |
| C | 0.24543913  | -4.50217975 | 0.92205235  |
| C | -0.48983189 | -3.36039565 | -2.58087570 |
| C | -2.26229993 | -1.71162431 | -1.09577961 |
| C | 1.18199416  | -5.22076594 | -1.23565439 |
| C | -0.69111589 | -3.78359355 | 3.07975910  |

|   |             |             |             |
|---|-------------|-------------|-------------|
| C | -2.36294194 | -1.92322326 | 1.73453779  |
| C | 1.08135215  | -5.43236489 | 1.59466301  |
| C | -2.21197893 | -1.60582483 | -2.51093831 |
| C | 1.23231516  | -5.11496646 | -2.65081309 |
| C | -2.41326294 | -2.02902274 | 3.14969649  |
| C | 1.03103115  | -5.53816437 | 3.00982171  |
| C | -1.32574491 | -2.43021050 | -3.25348641 |
| C | 0.39640214  | -4.18478131 | -3.32342380 |
| C | -1.57734992 | -2.95920789 | 3.82230721  |
| C | 0.14479713  | -4.71377870 | 3.75236981  |
| C | -3.14853379 | -0.88723881 | -0.35323157 |
| C | 2.01790701  | -6.15095092 | -0.56304373 |
| C | -3.19885479 | -0.99303829 | 1.06192713  |
| C | 1.96758601  | -6.25675039 | 0.85211497  |
| H | -1.28711822 | -2.34899823 | -4.33977015 |
| H | 0.43502882  | -4.10356904 | -4.40970754 |
| H | -1.61597660 | -3.04042016 | 4.90859094  |
| H | 0.10617044  | -4.79499097 | 4.83865355  |
| H | -3.79018540 | -0.17322338 | -0.86953132 |
| H | -3.87913309 | -0.36023514 | 1.63191123  |
| H | 2.69818531  | -6.78375407 | -1.13302783 |
| H | 2.60923762  | -6.97076582 | 1.36841473  |
| H | -2.85363037 | -0.89180957 | -3.02723813 |
| H | -3.09354107 | -1.39621976 | 3.71968065  |
| H | 1.91259329  | -5.74776944 | -3.22079724 |
| H | 1.67268259  | -6.25217963 | 3.52612153  |
| C | 4.72405836  | -3.90302729 | 0.31262010  |

|   |            |             |             |
|---|------------|-------------|-------------|
| C | 6.39534527 | -5.52502264 | 1.93789875  |
| C | 5.71070358 | -4.72999041 | -0.28659880 |
| C | 4.57305660 | -3.88706185 | 1.72447832  |
| C | 6.54634703 | -5.54098809 | 0.52604053  |
| C | 5.40870005 | -4.69805952 | 2.53711765  |
| C | 3.88841491 | -3.09202962 | -0.50001923 |
| C | 5.86170535 | -4.74595586 | -1.69845703 |
| C | 3.58641138 | -3.06009873 | 2.32369722  |
| C | 7.23098872 | -6.33602031 | 2.75053808  |
| C | 7.53299225 | -6.36795121 | -0.07317837 |
| C | 5.25769828 | -4.68209407 | 3.94897588  |
| C | 5.02606189 | -3.93495819 | -2.51109635 |
| C | 2.75076793 | -2.24910105 | 1.51105790  |
| C | 8.36863570 | -7.17894888 | 0.73946095  |
| C | 6.09334174 | -5.49309175 | 4.76161520  |
| C | 4.03941664 | -3.10799503 | -1.91187749 |
| C | 2.90176966 | -2.26506647 | 0.09919964  |
| C | 8.21763397 | -7.16298347 | 2.15131921  |
| C | 7.07998699 | -6.32005490 | 4.16239634  |
| C | 6.84835045 | -5.57291890 | -2.29767573 |
| C | 3.43540972 | -3.04413336 | 3.73555525  |
| C | 7.68399391 | -6.38391657 | -1.48503640 |
| C | 4.27105318 | -3.85513103 | 4.54819458  |
| H | 3.39797205 | -2.48546868 | -2.53566398 |
| H | 2.26032507 | -1.64254011 | -0.52458686 |
| H | 8.85907856 | -7.78550982 | 2.77510571  |
| H | 7.72143158 | -6.94258125 | 4.78618283  |

|    |            |             |             |
|----|------------|-------------|-------------|
| H  | 6.96426028 | -5.58517408 | -3.38142615 |
| H  | 8.44134840 | -7.01869817 | -1.94500027 |
| H  | 2.67805523 | -2.40935176 | 4.19551912  |
| H  | 4.15514335 | -3.84287585 | 5.63194500  |
| H  | 5.14197158 | -3.94721325 | -3.59484661 |
| H  | 9.12599012 | -7.81373043 | 0.27949732  |
| H  | 1.99341351 | -1.61431950 | 1.97102153  |
| H  | 5.97743205 | -5.48083668 | 5.84536547  |
| Cs | 0.20465800 | 0.10074000  | 0.48149700  |

109

n = 3, Energy = -275.898000220350 (67.5)

|   |             |             |             |
|---|-------------|-------------|-------------|
| C | -0.90922538 | -2.98638317 | 1.38654735  |
| C | 0.87928456  | -2.95981585 | -0.81938235 |
| C | 0.49256966  | -3.03254203 | 1.60844843  |
| C | -1.41676546 | -2.92694065 | 0.06168142  |
| C | 1.38682463  | -3.01925837 | 0.50548358  |
| C | -0.52251048 | -2.91365699 | -1.04128343 |
| C | -1.80348036 | -2.99966683 | 2.48951221  |
| C | 1.00010973  | -3.09198455 | 2.93331437  |
| C | -2.81856050 | -2.88078179 | -0.16021966 |
| C | 1.77353953  | -2.94653219 | -1.92234720 |
| C | 2.78861968  | -3.06541723 | 0.72738466  |
| C | -1.03005056 | -2.85421447 | -2.36614936 |
| C | 0.10585476  | -3.10526821 | 4.03627922  |
| C | -3.71281547 | -2.89406545 | 0.94274520  |
| C | 3.68287465  | -3.05213357 | -0.37558019 |
| C | -0.13579558 | -2.84093081 | -3.46911422 |

|   |             |             |             |
|---|-------------|-------------|-------------|
| C | -1.29594032 | -3.05910935 | 3.81437819  |
| C | -3.20527544 | -2.95350797 | 2.26761117  |
| C | 3.17533461  | -2.99269105 | -1.70044617 |
| C | 1.26599950  | -2.88708967 | -3.24721318 |
| C | 2.40190459  | -3.13814340 | 3.15521530  |
| C | -3.32610039 | -2.82133928 | -1.48508544 |
| C | 3.29615956  | -3.12485974 | 2.05225044  |
| C | -2.43184542 | -2.80805562 | -2.58805029 |
| H | -1.98237544 | -3.06930597 | 4.66102018  |
| H | -3.89171056 | -2.96370459 | 3.11425317  |
| H | 3.86176974  | -2.98249444 | -2.54708816 |
| H | 1.95243462  | -2.87689306 | -4.09385518 |
| H | 2.79149526  | -3.18377182 | 4.17218994  |
| H | 4.37218543  | -3.16029154 | 2.22258300  |
| H | -4.40212626 | -2.78590748 | -1.65541799 |
| H | -2.82143609 | -2.76242721 | -3.60502493 |
| H | 0.49544521  | -3.15089662 | 5.05325376  |
| H | 4.75890037  | -3.08756536 | -0.20524784 |
| H | -4.78884120 | -2.85863366 | 0.77241284  |
| H | -0.52538603 | -2.79530240 | -4.48608875 |
| C | -0.12583583 | 1.71423444  | -2.51030991 |
| C | 0.22543413  | 3.39397577  | -0.24741840 |
| C | 1.18201400  | 2.06471600  | -2.08241792 |
| C | -1.25805069 | 2.20362355  | -1.80675614 |
| C | 1.35764899  | 2.90458666  | -0.95097216 |
| C | -1.08241571 | 3.04349421  | -0.67531039 |
| C | -0.30147082 | 0.87436378  | -3.64175567 |

|   |             |             |             |
|---|-------------|-------------|-------------|
| C | 2.31422886  | 1.57532689  | -2.78597168 |
| C | -2.56590053 | 1.85314199  | -2.23464813 |
| C | 0.40106912  | 4.23384643  | 0.88402736  |
| C | 2.66549883  | 3.25506822  | -0.52308017 |
| C | -2.21463056 | 3.53288332  | 0.02824338  |
| C | 2.13859387  | 0.73545623  | -3.91741744 |
| C | -2.74153551 | 1.01327133  | -3.36609389 |
| C | 2.84113381  | 4.09493888  | 0.60836558  |
| C | -2.03899558 | 4.37275398  | 1.15968914  |
| C | 0.83074403  | 0.38497464  | -4.34530948 |
| C | -1.60932066 | 0.52388219  | -4.06964770 |
| C | 1.70891896  | 4.58432802  | 1.31191940  |
| C | -0.73114573 | 4.72323557  | 1.58758117  |
| C | 3.62207846  | 1.92580846  | -2.35807967 |
| C | -3.69811515 | 2.34253109  | -1.53109439 |
| C | 3.79771344  | 2.76567912  | -1.22663391 |
| C | -3.52248016 | 3.18240175  | -0.39964864 |
| H | 0.69592563  | -0.25971479 | -5.21381357 |
| H | -1.74413906 | -0.12080724 | -4.93815180 |
| H | 1.84373736  | 5.22901744  | 2.18042349  |
| H | -0.59632733 | 5.36792499  | 2.45608527  |
| H | 4.49117305  | 1.55015060  | -2.89813154 |
| H | 4.80162645  | 3.03471076  | -0.89818159 |
| H | -4.70202815 | 2.07349945  | -1.85954671 |
| H | -4.39157475 | 3.55805961  | 0.14040323  |
| H | 3.00768822  | 0.35979834  | -4.45746933 |
| H | 3.84504658  | 4.36397056  | 0.93681798  |



|   |             |             |             |
|---|-------------|-------------|-------------|
| H | -3.74544829 | 0.74423965  | -3.69454628 |
| H | -2.90808992 | 4.74841186  | 1.69974103  |
| C | 4.19152563  | -1.04720956 | -6.50806673 |
| C | 5.76546850  | -2.54342614 | -4.67786475 |
| C | 3.91760064  | -2.42440304 | -6.29663518 |
| C | 5.25242204  | -0.41812437 | -5.80439728 |
| C | 4.70457208  | -3.17251133 | -5.38153419 |
| C | 6.03939348  | -1.16623266 | -4.88929629 |
| C | 3.40455419  | -0.29910127 | -7.42316772 |
| C | 2.85670422  | -3.05348823 | -7.00030463 |
| C | 5.52634703  | 0.95906911  | -6.01582883 |
| C | 6.55243994  | -3.29153443 | -3.76276376 |
| C | 4.43064710  | -4.54970481 | -5.17010265 |
| C | 7.10028990  | -0.53714746 | -4.18562685 |
| C | 2.06973279  | -2.30537994 | -7.91540562 |
| C | 4.73937559  | 1.70717740  | -6.93092982 |
| C | 5.21761854  | -5.29781310 | -4.25500166 |
| C | 7.88726134  | -1.28525575 | -3.27052586 |
| C | 2.34365774  | -0.92818643 | -8.12683720 |
| C | 3.67847914  | 1.07809225  | -7.63459930 |
| C | 6.27851499  | -4.66872794 | -3.55133217 |
| C | 7.61333639  | -2.66244927 | -3.05909427 |
| C | 2.58277937  | -4.43068151 | -6.78887303 |
| C | 6.58724332  | 1.58815411  | -5.31215943 |
| C | 3.36975081  | -5.17878980 | -5.87377204 |
| C | 7.37421475  | 0.84004582  | -4.39705844 |
| H | 1.73957406  | -0.35393431 | -8.82927384 |

|    |            |             |             |
|----|------------|-------------|-------------|
| H  | 3.07439546 | 1.65234436  | -8.33703594 |
| H  | 6.88259867 | -5.24298005 | -2.84889553 |
| H  | 8.21742007 | -3.23670138 | -2.35665763 |
| H  | 1.76842923 | -4.91357091 | -7.32901370 |
| H  | 3.15948442 | -6.23593137 | -5.71147600 |
| H  | 6.79750971 | 2.64529568  | -5.47445548 |
| H  | 8.18856489 | 1.32293522  | -3.85691777 |
| H  | 1.25538275 | -2.78826911 | -8.45554628 |
| H  | 5.00735231 | -6.35495450 | -4.09270552 |
| H  | 4.94964182 | 2.76431881  | -7.09322595 |
| H  | 8.70161138 | -0.80236658 | -2.73038519 |
| Cs | 0.20465800 | 0.10074000  | 0.48149700  |

109

n = 3, Energy = -264.182820224709 (79.2)

|   |            |             |            |
|---|------------|-------------|------------|
| C | 3.09597211 | -4.40071011 | 4.53047385 |
| C | 4.21841999 | -5.37257039 | 2.10948275 |
| C | 2.41299170 | -5.39372400 | 3.77956689 |
| C | 4.34017646 | -3.89362636 | 4.07088525 |
| C | 2.97421564 | -5.87965414 | 2.56907135 |
| C | 4.90140040 | -4.37955650 | 2.86038970 |
| C | 2.53474818 | -3.91477998 | 5.74096940 |
| C | 1.16878735 | -5.90080775 | 4.23915549 |
| C | 5.02315688 | -2.90061248 | 4.82179220 |
| C | 4.77964392 | -5.85850052 | 0.89898720 |
| C | 2.29123522 | -6.87266802 | 1.81816439 |
| C | 6.14560475 | -3.87247275 | 2.40080110 |
| C | 0.60756341 | -5.41487761 | 5.44965104 |

|   |             |             |             |
|---|-------------|-------------|-------------|
| C | 4.46193294  | -2.41468234 | 6.03228775  |
| C | 2.85245916  | -7.35859816 | 0.60766885  |
| C | 6.70682869  | -4.35840288 | 1.19030555  |
| C | 1.29054380  | -4.42186371 | 6.20055804  |
| C | 3.21772857  | -2.92176607 | 6.49187640  |
| C | 4.09666353  | -6.85151443 | 0.14808020  |
| C | 6.02384830  | -5.35141679 | 0.43939855  |
| C | 0.48580712  | -6.89382149 | 3.48824857  |
| C | 6.26736104  | -2.39352887 | 4.36220357  |
| C | 1.04703106  | -7.37975163 | 2.27775302  |
| C | 6.82858498  | -2.87945901 | 3.15170803  |
| H | 0.85974517  | -4.04886101 | 7.12974120  |
| H | 2.78692993  | -2.54876338 | 7.42105956  |
| H | 4.52746217  | -7.22451712 | -0.78110296 |
| H | 6.45464693  | -5.72441948 | -0.48978461 |
| H | -0.46925124 | -7.28306188 | 3.84103138  |
| H | 0.52277138  | -8.14199475 | 1.70135257  |
| H | 6.79162072  | -1.63128575 | 4.93860402  |
| H | 7.78364334  | -2.49021862 | 2.79892521  |
| H | -0.34749478 | -5.80411784 | 5.80243393  |
| H | 2.32819969  | -8.12084116 | 0.03126838  |
| H | 4.98619241  | -1.65243934 | 6.60868822  |
| H | 7.66188688  | -3.96916266 | 0.83752266  |
| C | 0.62689351  | -2.10129650 | 3.03327834  |
| C | 2.70911880  | -2.07311531 | 1.10217939  |
| C | 1.73955028  | -1.23521106 | 3.20147764  |
| C | 0.55534939  | -2.95329134 | 1.89952956  |

|   |             |             |             |
|---|-------------|-------------|-------------|
| C | 2.78066292  | -1.22112047 | 2.23592817  |
| C | 1.59646203  | -2.93920075 | 0.93398008  |
| C | -0.41421914 | -2.11538710 | 3.99882781  |
| C | 1.81109440  | -0.38321622 | 4.33522643  |
| C | -0.55730738 | -3.81937678 | 1.73133025  |
| C | 3.75023145  | -2.05902472 | 0.13662991  |
| C | 3.89331969  | -0.35503503 | 2.40412748  |
| C | 1.52491791  | -3.79119559 | -0.19976870 |
| C | 0.76998175  | -0.39730681 | 5.30077590  |
| C | -1.59842003 | -3.83346738 | 2.69687972  |
| C | 4.93443234  | -0.34094443 | 1.43857800  |
| C | 2.56603056  | -3.77710500 | -1.16531818 |
| C | -0.34267506 | -1.26339225 | 5.13257664  |
| C | -1.52687595 | -2.98147253 | 3.83062855  |
| C | 4.86288826  | -1.19293928 | 0.30482918  |
| C | 3.67868737  | -2.91101956 | -0.99711891 |
| C | 2.92375105  | 0.48286905  | 4.50342561  |
| C | -0.62885139 | -4.67137146 | 0.59758159  |
| C | 3.96486370  | 0.49695965  | 3.53787613  |
| C | 0.41226126  | -4.65728087 | -0.36796788 |
| H | -1.14183896 | -1.27420827 | 5.87373782  |
| H | -2.32603984 | -2.99228855 | 4.57178973  |
| H | 5.66205216  | -1.18212326 | -0.43633200 |
| H | 4.47785127  | -2.90020354 | -1.73828009 |
| H | 2.97866874  | 1.13686516  | 5.37369763  |
| H | 4.81894537  | 1.16177178  | 3.66698690  |
| H | -1.48293306 | -5.33618359 | 0.46847083  |

|   |             |             |             |
|---|-------------|-------------|-------------|
| H | 0.35734357  | -5.31127697 | -1.23823991 |
| H | 0.82489928  | 0.25668913  | 6.17104784  |
| H | 5.78851394  | 0.32386753  | 1.56768860  |
| H | -2.45250163 | -4.49827934 | 2.56776913  |
| H | 2.51111303  | -4.43110094 | -2.03559012 |
| C | 3.56113259  | -7.46372284 | 6.84206824  |
| C | 6.05094248  | -6.45163543 | 5.92439439  |
| C | 4.12376372  | -7.95173860 | 5.63306579  |
| C | 4.24340640  | -6.46966338 | 7.59223376  |
| C | 5.36866866  | -7.44569489 | 5.17422887  |
| C | 5.48831135  | -5.96361968 | 7.13339684  |
| C | 2.31622764  | -7.96976655 | 7.30090516  |
| C | 3.44148990  | -8.94579806 | 4.88290027  |
| C | 3.68077527  | -5.98164763 | 8.80123620  |
| C | 7.29584742  | -5.94559172 | 5.46555747  |
| C | 5.93129980  | -7.93371064 | 3.96522643  |
| C | 6.17058516  | -4.96956022 | 7.88356236  |
| C | 2.19658496  | -9.45184176 | 5.34173720  |
| C | 2.43587032  | -6.48769133 | 9.26007313  |
| C | 7.17620474  | -7.42766694 | 3.50638950  |
| C | 7.41549010  | -4.46351651 | 7.42472544  |
| C | 1.63395377  | -8.96382603 | 6.55073966  |
| C | 1.75359646  | -7.48175081 | 8.50990762  |
| C | 7.85847861  | -6.43360746 | 4.25655501  |
| C | 7.97812129  | -4.95153224 | 6.21572297  |
| C | 4.00412105  | -9.43381367 | 3.67389802  |
| C | 4.36304907  | -4.98758831 | 9.55140154  |

|    |            |              |             |
|----|------------|--------------|-------------|
| C  | 5.24902599 | -8.92776996  | 3.21506110  |
| C  | 5.60795402 | -4.48154460  | 9.09256461  |
| H  | 0.67835777 | -9.35226801  | 6.90294545  |
| H  | 0.79800045 | -7.87019280  | 8.86211341  |
| H  | 8.81407461 | -6.04516547  | 3.90434922  |
| H  | 8.93371729 | -4.56309026  | 5.86351718  |
| H  | 3.48040379 | -10.19685938 | 3.09806667  |
| H  | 5.68090484 | -9.30237365  | 2.28702392  |
| H  | 3.93117022 | -4.61298462  | 10.47943871 |
| H  | 6.13167127 | -3.71849889  | 9.66839596  |
| H  | 1.67286766 | -10.21488735 | 4.76590606  |
| H  | 7.60808366 | -7.80227046  | 2.57835250  |
| H  | 2.00399141 | -6.11308781  | 10.18811013 |
| H  | 7.93920740 | -3.70047092  | 8.00055657  |
| Cs | 0.20465800 | 0.10074000   | 0.48149700  |

145

n = 4, Energy = -411.752879859596 (28.8)

|   |             |             |            |
|---|-------------|-------------|------------|
| C | 0.24325607  | -5.28608870 | 4.37850086 |
| C | 1.84770955  | -6.46628180 | 2.35403234 |
| C | 1.64358944  | -5.42146852 | 4.57121525 |
| C | -0.35485056 | -5.74080542 | 3.17355221 |
| C | 2.44581618  | -6.01156508 | 3.55898099 |
| C | 0.44737619  | -6.33090197 | 2.16131796 |
| C | -0.55897067 | -4.69599214 | 5.39073512 |
| C | 2.24169607  | -4.96675180 | 5.77616390 |
| C | -1.75518392 | -5.60542559 | 2.98083783 |
| C | 2.64993629  | -7.05637835 | 1.34179809 |

|   |             |             |             |
|---|-------------|-------------|-------------|
| C | 3.84614955  | -6.14694491 | 3.75169538  |
| C | -0.15073044 | -6.78561870 | 0.95636931  |
| C | 1.43946933  | -4.37665525 | 6.78839815  |
| C | -2.55741067 | -5.01532904 | 3.99307208  |
| C | 4.64837629  | -6.73704146 | 2.73946112  |
| C | 0.65149630  | -7.37571525 | -0.05586495 |
| C | 0.03913592  | -4.24127540 | 6.59568381  |
| C | -1.95930407 | -4.56061229 | 5.19802077  |
| C | 4.05026970  | -7.19175821 | 1.53451243  |
| C | 2.05182970  | -7.51109510 | 0.13684940  |
| C | 3.64202924  | -5.10213166 | 5.96887815  |
| C | -2.35329036 | -6.06014228 | 1.77588932  |
| C | 4.44425598  | -5.69222821 | 4.95664389  |
| C | -1.55106362 | -6.65023884 | 0.76365506  |
| H | -0.57665781 | -3.78831398 | 7.37268049  |
| H | -2.57509781 | -4.10765087 | 5.97501745  |
| H | 4.66606343  | -7.64471962 | 0.75751575  |
| H | 2.66762344  | -7.96405652 | -0.64014728 |
| H | 4.10113932  | -4.75308852 | 6.89380360  |
| H | 5.51915986  | -5.79614653 | 5.10457257  |
| H | -3.42819424 | -5.95622396 | 1.62796063  |
| H | -2.01017369 | -6.99928198 | -0.16127039 |
| H | 1.89857918  | -4.02761211 | 7.71332351  |
| H | 5.72328001  | -6.84095983 | 2.88738962  |
| H | -3.63231438 | -4.91141066 | 3.84514358  |
| H | 0.19238645  | -7.72475839 | -0.98079030 |
| C | 3.29898708  | 2.07505729  | 1.22119893  |

|   |             |             |             |
|---|-------------|-------------|-------------|
| C | 2.41152496  | 1.76577659  | -1.45879285 |
| C | 3.96491434  | 1.17025614  | 0.35270837  |
| C | 2.18932877  | 2.82521809  | 0.74969359  |
| C | 3.52118328  | 1.01561579  | -0.98728752 |
| C | 1.74559771  | 2.67057774  | -0.59030230 |
| C | 3.74271815  | 2.22969765  | 2.56119482  |
| C | 5.07457265  | 0.42009534  | 0.82421370  |
| C | 1.52340152  | 3.73001924  | 1.61818415  |
| C | 1.96779390  | 1.61113623  | -2.79878874 |
| C | 4.18711053  | 0.11081464  | -1.85577808 |
| C | 0.63593940  | 3.42073854  | -1.06180763 |
| C | 5.51830371  | 0.57473570  | 2.16420959  |
| C | 1.96713258  | 3.88465959  | 2.95818004  |
| C | 3.74337947  | -0.04382571 | -3.19577397 |
| C | 0.19220833  | 3.26609818  | -2.40180352 |
| C | 4.85237648  | 1.47953685  | 3.03270021  |
| C | 3.07679091  | 3.13449880  | 3.42968543  |
| C | 2.63372114  | 0.70633508  | -3.66727936 |
| C | 0.85813557  | 2.36129703  | -3.27029413 |
| C | 5.74049973  | -0.48470565 | -0.04427681 |
| C | 0.41374337  | 4.48017988  | 1.14667878  |
| C | 5.29676867  | -0.63934600 | -1.38427270 |
| C | -0.02998769 | 4.32553953  | -0.19331711 |
| H | 5.19298692  | 1.59823965  | 4.06128855  |
| H | 3.41740136  | 3.25320160  | 4.45827377  |
| H | 2.29311069  | 0.58763228  | -4.69586770 |
| H | 0.51752512  | 2.24259422  | -4.29888248 |



|   |             |             |             |
|---|-------------|-------------|-------------|
| H | 6.59227979  | -1.06053336 | 0.31765335  |
| H | 5.80793824  | -1.33387653 | -2.05093100 |
| H | -0.09742620 | 5.17471041  | 1.81333707  |
| H | -0.88176774 | 4.90136724  | -0.55524728 |
| H | 6.37008361  | -0.00109185 | 2.52613985  |
| H | 4.25454885  | -0.73835609 | -3.86243227 |
| H | 1.45596320  | 4.57918997  | 3.62483835  |
| H | -0.65957157 | 3.84192573  | -2.76373378 |
| C | 4.83516623  | -2.44822002 | 3.50387508  |
| C | 3.60352746  | -3.38035953 | 1.12064589  |
| C | 5.62527868  | -3.02782403 | 2.47616813  |
| C | 3.42923439  | -2.33468577 | 3.33996743  |
| C | 5.00945930  | -3.49389379 | 1.28455353  |
| C | 2.81341501  | -2.80075552 | 2.14835284  |
| C | 5.45098561  | -1.98215027 | 4.69548968  |
| C | 7.03121052  | -3.14135829 | 2.64007578  |
| C | 2.63912194  | -1.75508175 | 4.36767438  |
| C | 2.98770808  | -3.84642928 | -0.07096871 |
| C | 5.79957176  | -4.07349780 | 0.25684658  |
| C | 1.40748317  | -2.68722126 | 1.98444519  |
| C | 7.64702990  | -2.67528854 | 3.83169038  |
| C | 3.25494132  | -1.28901200 | 5.55928898  |
| C | 5.18375237  | -4.53956755 | -0.93476801 |
| C | 0.79166379  | -3.15329101 | 0.79283059  |
| C | 6.85691747  | -2.09568451 | 4.85939738  |
| C | 4.66087318  | -1.40254624 | 5.72319668  |
| C | 3.77782051  | -4.42603331 | -1.09867571 |

|   |             |             |             |
|---|-------------|-------------|-------------|
| C | 1.58177622  | -3.73289505 | -0.23487641 |
| C | 7.82132276  | -3.72096223 | 1.61236892  |
| C | 1.23319031  | -1.64154756 | 4.20376665  |
| C | 7.20550338  | -4.18703199 | 0.42075432  |
| C | 0.61737093  | -2.10761732 | 3.01215205  |
| H | 7.32962388  | -1.73792676 | 5.77408742  |
| H | 5.13357958  | -1.04478849 | 6.63788672  |
| H | 3.30511411  | -4.78379106 | -2.01336575 |
| H | 1.10906981  | -4.09065280 | -1.14956645 |
| H | 8.90052406  | -3.80811179 | 1.73818534  |
| H | 7.81199822  | -4.63193933 | -0.36811939 |
| H | 0.62669547  | -1.19664022 | 4.99264036  |
| H | -0.46183037 | -2.02046777 | 2.88633562  |
| H | 8.72623101  | -2.76243800 | 3.95750694  |
| H | 5.79024698  | -4.98447485 | -1.72364169 |
| H | 2.64844671  | -0.84410471 | 6.34816266  |
| H | -0.28753732 | -3.06614155 | 0.66701403  |
| C | -3.30567001 | 2.34475303  | -1.05751230 |
| C | -2.97680391 | -0.37517624 | -0.30956083 |
| C | -3.35106522 | 1.97470765  | 0.31267227  |
| C | -3.09584174 | 1.35483378  | -2.05372114 |
| C | -3.18663218 | 0.61474301  | 0.68664801  |
| C | -2.93140869 | -0.00513086 | -1.67974541 |
| C | -3.47010305 | 3.70471766  | -1.43148804 |
| C | -3.56089349 | 2.96462690  | 1.30888111  |
| C | -3.05044652 | 1.72487916  | -3.42390572 |
| C | -2.81237087 | -1.73514087 | 0.06441490  |

|    |             |             |             |
|----|-------------|-------------|-------------|
| C  | -3.23202740 | 0.24469763  | 2.05683258  |
| C  | -2.72158043 | -0.99505011 | -2.67595425 |
| C  | -3.72532654 | 4.32459153  | 0.93490537  |
| C  | -3.21487957 | 3.08484379  | -3.79788145 |
| C  | -3.06759435 | -1.11526700 | 2.43080831  |
| C  | -2.55714738 | -2.35501474 | -2.30197851 |
| C  | -3.67993133 | 4.69463697  | -0.43527921 |
| C  | -3.42470784 | 4.07476310  | -2.80167263 |
| C  | -2.85776608 | -2.10518631 | 1.43459949  |
| C  | -2.60254259 | -2.72506018 | -0.93179392 |
| C  | -3.60628868 | 2.59458146  | 2.67906545  |
| C  | -2.84061828 | 0.73495996  | -4.42011433 |
| C  | -3.44185564 | 1.23461682  | 3.05304119  |
| C  | -2.67618524 | -0.62500467 | -4.04613859 |
| H  | -3.80615105 | 5.73855343  | -0.72234508 |
| H  | -3.55092757 | 5.11867956  | -3.08873850 |
| H  | -2.73154635 | -3.14910277 | 1.72166536  |
| H  | -2.47632287 | -3.76897664 | -0.64472805 |
| H  | -3.76735406 | 3.35444911  | 3.44376106  |
| H  | -3.47670127 | 0.95056790  | 4.10480269  |
| H  | -2.80577265 | 1.01900889  | -5.47187583 |
| H  | -2.51511986 | -1.38487232 | -4.81083419 |
| H  | -3.88639189 | 5.08445918  | 1.69960073  |
| H  | -3.10243995 | -1.39931604 | 3.48256960  |
| H  | -3.18003397 | 3.36889283  | -4.84964274 |
| H  | -2.39608203 | -3.11488239 | -3.06667387 |
| Cs | 0.20465800  | 0.10074000  | 0.48149700  |

n = 4, Energy = -406.046837565924 (34.4)

|   |             |             |             |
|---|-------------|-------------|-------------|
| C | -2.53701818 | 0.16084824  | 2.75451255  |
| C | -2.27533786 | -2.60274643 | 3.35423534  |
| C | -2.18955159 | -0.25076022 | 4.06837918  |
| C | -2.75364461 | -0.80934064 | 1.74050731  |
| C | -2.05871143 | -1.63255756 | 4.36824057  |
| C | -2.62280445 | -2.19113797 | 2.04036871  |
| C | -2.66785835 | 1.54264557  | 2.45465115  |
| C | -1.97292516 | 0.71942865  | 5.08238441  |
| C | -3.10111121 | -0.39773218 | 0.42664069  |
| C | -2.14449769 | -3.98454377 | 3.65409673  |
| C | -1.71124483 | -2.04416602 | 5.68210720  |
| C | -2.83943088 | -3.16132685 | 1.02636348  |
| C | -2.10376533 | 2.10122599  | 4.78252301  |
| C | -3.23195137 | 0.98406516  | 0.12677929  |
| C | -1.58040467 | -3.42596335 | 5.98196860  |
| C | -2.70859072 | -4.54312418 | 1.32622487  |
| C | -2.45123192 | 2.51283450  | 3.46865637  |
| C | -3.01532495 | 1.95425409  | 1.14078451  |
| C | -1.79703110 | -4.39615228 | 4.96796338  |
| C | -2.36112412 | -4.95473270 | 2.64009151  |
| C | -1.62545862 | 0.30782014  | 6.39625081  |
| C | -3.31773758 | -1.36792100 | -0.58736432 |
| C | -1.49461846 | -1.07397720 | 6.69611221  |
| C | -3.18689742 | -2.74971833 | -0.28750293 |
| H | -2.55166557 | 3.57350987  | 3.23848109  |

|   |             |             |             |
|---|-------------|-------------|-------------|
| H | -3.11575859 | 3.01492946  | 0.91060923  |
| H | -1.69659745 | -5.45682765 | 5.19813866  |
| H | -2.26069048 | -6.01540807 | 2.87026680  |
| H | -1.45917494 | 1.05254264  | 7.17460703  |
| H | -1.22790112 | -1.38993018 | 7.70464373  |
| H | -3.58445492 | -1.05196802 | -1.59589585 |
| H | -3.35318111 | -3.49444083 | -1.06585914 |
| H | -1.93748170 | 2.84594849  | 5.56087899  |
| H | -1.31368738 | -3.74191645 | 6.99049991  |
| H | -3.49866866 | 1.30001825  | -0.88175202 |
| H | -2.87487434 | -5.28784669 | 0.54786890  |
| C | 4.22371081  | -1.10975026 | 0.11184158  |
| C | 3.73473016  | 0.31564127  | 2.51907161  |
| C | 3.20771976  | -1.54729359 | 1.00218876  |
| C | 4.99521154  | 0.04048883  | 0.42510942  |
| C | 2.96322944  | -0.83459782 | 2.20580377  |
| C | 4.75072121  | 0.75318460  | 1.62872443  |
| C | 4.46820114  | -1.82244602 | -1.09177344 |
| C | 2.43621904  | -2.69753268 | 0.68892092  |
| C | 6.01120259  | 0.47803216  | -0.46523776 |
| C | 3.49023984  | 1.02833704  | 3.72268663  |
| C | 1.94723839  | -1.27214115 | 3.09615095  |
| C | 5.52222194  | 1.90342369  | 1.94199227  |
| C | 2.68070936  | -3.41022844 | -0.51469409 |
| C | 6.25569291  | -0.23466360 | -1.66885278 |
| C | 1.70274806  | -0.55944538 | 4.29976597  |
| C | 5.27773161  | 2.61611946  | 3.14560728  |

|   |             |             |             |
|---|-------------|-------------|-------------|
| C | 3.69670042  | -2.97268515 | -1.40504132 |
| C | 5.48419220  | -1.38490273 | -1.98212067 |
| C | 2.47424878  | 0.59079374  | 4.61303385  |
| C | 4.26174055  | 2.17857616  | 4.03595451  |
| C | 1.42022816  | -3.13507585 | 1.57926804  |
| C | 6.78270314  | 1.62827110  | -0.15196987 |
| C | 1.17573783  | -2.42238009 | 2.78288306  |
| C | 6.53821282  | 2.34096686  | 1.05164515  |
| H | 3.88437256  | -3.51975440 | -2.32894295 |
| H | 5.67186434  | -1.93197198 | -2.90602229 |
| H | 2.28657663  | 1.13786300  | 5.53693548  |
| H | 4.07406841  | 2.72564542  | 4.95985614  |
| H | 0.82801979  | -4.01800594 | 1.33880188  |
| H | 0.39585730  | -2.75824086 | 3.46631862  |
| H | 7.56258367  | 1.96413187  | -0.83540543 |
| H | 7.13042118  | 3.22389695  | 1.29211131  |
| H | 2.08850118  | -4.29315841 | -0.75516036 |
| H | 0.92286769  | -0.89530597 | 4.98320152  |
| H | 7.03557328  | 0.10119698  | -2.35228833 |
| H | 5.86993980  | 3.49904942  | 3.38607355  |
| C | 0.03500405  | -4.11159403 | -4.98020406 |
| C | -1.55551719 | -5.58946421 | -3.14942788 |
| C | 0.64978907  | -5.01797417 | -4.07637083 |
| C | -1.37504160 | -3.94414899 | -4.96864920 |
| C | -0.14547155 | -5.75690925 | -3.16098274 |
| C | -2.17030222 | -4.68308408 | -4.05326111 |
| C | 0.83026467  | -3.37265895 | -5.89559216 |

|   |             |             |             |
|---|-------------|-------------|-------------|
| C | 2.05983472  | -5.18541921 | -4.08792570 |
| C | -1.98982662 | -3.03776886 | -5.87248243 |
| C | -2.35077781 | -6.32839930 | -2.23403978 |
| C | 0.46931348  | -6.66328938 | -2.25714951 |
| C | -3.58034786 | -4.51563904 | -4.04170624 |
| C | 2.85509534  | -4.44648412 | -5.00331379 |
| C | -1.19456600 | -2.29883377 | -6.78787052 |
| C | -0.32594714 | -7.40222447 | -1.34176142 |
| C | -4.37560848 | -5.25457412 | -3.12631815 |
| C | 2.24031034  | -3.54010396 | -5.90714706 |
| C | 0.21547968  | -2.46627878 | -6.79942542 |
| C | -1.73599282 | -7.23477946 | -1.33020651 |
| C | -3.76082349 | -6.16095429 | -2.22248488 |
| C | 2.67461954  | -6.09179924 | -3.18409255 |
| C | -3.39987207 | -2.87032392 | -5.86092748 |
| C | 1.87935892  | -6.83073432 | -2.26870446 |
| C | -4.19513269 | -3.60925901 | -4.94553939 |
| H | 2.85075685  | -2.97289325 | -6.60980408 |
| H | 0.82592618  | -1.89906808 | -7.50208245 |
| H | -2.34643932 | -7.80199017 | -0.62754949 |
| H | -4.37126999 | -6.72816499 | -1.51982786 |
| H | 3.75697862  | -6.22033102 | -3.19296212 |
| H | 2.35127143  | -7.52647688 | -1.57491692 |
| H | -3.87178458 | -2.17458137 | -6.55471501 |
| H | -5.27749177 | -3.48072722 | -4.93666982 |
| H | 3.93745425  | -4.57501577 | -5.01218348 |
| H | 0.14596514  | -8.09796695 | -0.64797393 |

|   |             |             |             |
|---|-------------|-------------|-------------|
| H | -1.66647828 | -1.60309129 | -7.48165801 |
| H | -5.45796740 | -5.12604247 | -3.11744846 |
| C | 0.13655672  | 3.86058747  | -0.98169799 |
| C | -1.56078403 | 2.32493386  | -2.66288860 |
| C | 0.63503887  | 2.69302355  | -1.61786630 |
| C | -1.21059580 | 4.26032459  | -1.18612498 |
| C | -0.21363151 | 1.92519675  | -2.45846160 |
| C | -2.05926618 | 3.49249778  | -2.02672029 |
| C | 0.98522710  | 4.62841428  | -0.14110269 |
| C | 1.98219139  | 2.29328643  | -1.41343931 |
| C | -1.70907794 | 5.42788851  | -0.54995667 |
| C | -2.40945441 | 1.55710706  | -3.50348390 |
| C | 0.28485063  | 0.75763282  | -3.09462991 |
| C | -3.40641870 | 3.89223490  | -2.23114728 |
| C | 2.83086177  | 3.06111324  | -0.57284400 |
| C | -0.86040756 | 6.19571531  | 0.29063863  |
| C | -0.56381975 | -0.01019398 | -3.93522522 |
| C | -4.25508908 | 3.12440810  | -3.07174258 |
| C | 2.33237966  | 4.22867719  | 0.06332434  |
| C | 0.48674499  | 5.79597823  | 0.49506566  |
| C | -1.91097230 | 0.38954310  | -4.13965225 |
| C | -3.75660697 | 1.95684414  | -3.70791093 |
| C | 2.48067335  | 1.12572267  | -2.04960758 |
| C | -3.05623029 | 5.82762547  | -0.75438371 |
| C | 1.63200298  | 0.35789586  | -2.89020288 |
| C | -3.90490066 | 5.05979867  | -1.59497901 |
| H | 2.98382379  | 4.81806535  | 0.70857000  |



|    |             |             |             |
|----|-------------|-------------|-------------|
| H  | 1.13818913  | 6.38536638  | 1.14031132  |
| H  | -2.56241644 | -0.19984505 | -4.78489791 |
| H  | -4.40805110 | 1.36745599  | -4.35315659 |
| H  | 3.51475531  | 0.81888216  | -1.89268826 |
| H  | 2.01464073  | -0.53833286 | -3.37852929 |
| H  | -3.43886804 | 6.72385420  | -0.26605729 |
| H  | -4.93898262 | 5.36663918  | -1.75189833 |
| H  | 3.86494358  | 2.75427292  | -0.41592461 |
| H  | -0.18118221 | -0.90642258 | -4.42355163 |
| H  | -1.24304510 | 7.09194392  | 0.77896504  |
| H  | -5.28917089 | 3.43124842  | -3.22866198 |
| Cs | 0.20465800  | 0.10074000  | 0.48149700  |

145

n = 4, Energy = -396.292075573918 (44.2)

|   |             |             |             |
|---|-------------|-------------|-------------|
| C | 1.22201762  | 0.02268593  | -2.70869487 |
| C | 2.95117371  | -1.32218811 | -0.90122909 |
| C | 2.27237639  | 0.73297531  | -2.06944883 |
| C | 1.03623689  | -1.36004048 | -2.44420803 |
| C | 3.13695444  | 0.06053829  | -1.16571594 |
| C | 1.90081494  | -2.03247750 | -1.54047514 |
| C | 0.35743957  | 0.69512294  | -3.61242776 |
| C | 2.45815712  | 2.11570172  | -2.33393567 |
| C | -0.01412189 | -2.07032986 | -3.08345407 |
| C | 3.81575176  | -1.99462513 | 0.00250380  |
| C | 4.18731322  | 0.77082768  | -0.52646989 |
| C | 1.71503421  | -3.41520390 | -1.27598830 |
| C | 1.59357907  | 2.78813873  | -3.23766856 |

|   |             |             |             |
|---|-------------|-------------|-------------|
| C | -0.87869993 | -1.39789285 | -3.98718696 |
| C | 5.05189126  | 0.09839066  | 0.37726300  |
| C | 2.57961226  | -4.08764092 | -0.37225541 |
| C | 0.54322026  | 2.07784938  | -3.87691464 |
| C | -0.69291924 | -0.01516641 | -4.25167384 |
| C | 4.86611057  | -1.28433577 | 0.64174988  |
| C | 3.62997107  | -3.37735156 | 0.26699068  |
| C | 3.50851578  | 2.82599090  | -1.69468966 |
| C | -0.19990249 | -3.45305606 | -2.81896719 |
| C | 4.37309382  | 2.15355388  | -0.79095677 |
| C | 0.66467555  | -4.12549308 | -1.91523431 |
| H | -0.12043469 | 2.59401579  | -4.57062507 |
| H | -1.35657419 | 0.50100000  | -4.94538427 |
| H | 5.52976552  | -1.80050219 | 1.33546030  |
| H | 4.29362602  | -3.89351798 | 0.96070110  |
| H | 3.65112214  | 3.88737957  | -1.89771126 |
| H | 5.17935521  | 2.69877608  | -0.30026787 |
| H | -1.00616388 | -3.99827826 | -3.30965610 |
| H | 0.52206919  | -5.18688176 | -1.71221271 |
| H | 1.73618528  | 3.84952723  | -3.44069023 |
| H | 5.85815256  | 0.64361263  | 0.86795190  |
| H | -1.68496123 | -1.94311482 | -4.47787587 |
| H | 2.43700605  | -5.14902942 | -0.16923374 |
| C | -2.85668430 | -2.16623500 | 5.98842172  |
| C | -2.72505078 | -4.69071751 | 4.69410329  |
| C | -3.88927870 | -2.56212690 | 5.09768130  |
| C | -1.75827315 | -3.03258436 | 6.23200292  |

|   |             |             |            |
|---|-------------|-------------|------------|
| C | -3.82346194 | -3.82436815 | 4.45052208 |
| C | -1.69245639 | -4.29482561 | 5.58484371 |
| C | -2.92250106 | -0.90399375 | 6.63558093 |
| C | -4.98768985 | -1.69577754 | 4.85410009 |
| C | -0.72567875 | -2.63669246 | 7.12274334 |
| C | -2.65923402 | -5.95295876 | 4.04694408 |
| C | -4.85605633 | -4.22026005 | 3.55978166 |
| C | -0.59404523 | -5.16117497 | 5.82842492 |
| C | -5.05350661 | -0.43353629 | 5.50125931 |
| C | -0.79149551 | -1.37445121 | 7.76990256 |
| C | -4.79023957 | -5.48250131 | 2.91262245 |
| C | -0.52822847 | -6.42341622 | 5.18126570 |
| C | -4.02091222 | -0.03764434 | 6.39199975 |
| C | -1.88990667 | -0.50810180 | 7.52632138 |
| C | -3.69182841 | -6.34885072 | 3.15620363 |
| C | -1.56082286 | -6.81930817 | 4.29052525 |
| C | -6.02028404 | -2.09166949 | 3.96335978 |
| C | 0.37273220  | -3.50304177 | 7.36632444 |
| C | -5.95446728 | -3.35391074 | 3.31620057 |
| C | 0.43854896  | -4.76528302 | 6.71916523 |
| H | -4.07143353 | 0.93125911  | 6.88876279 |
| H | -1.94042798 | 0.46080165  | 8.02308442 |
| H | -3.64130710 | -7.31775417 | 2.65944059 |
| H | -1.51030155 | -7.78821162 | 3.79376222 |
| H | -6.86343072 | -1.42665479 | 3.77638545 |
| H | -6.74709264 | -3.65779961 | 2.63246314 |
| H | 1.16535755  | -3.19915291 | 8.05006187 |

|   |             |             |            |
|---|-------------|-------------|------------|
| H | 1.28169563  | -5.43029772 | 6.90613956 |
| H | -5.89665308 | 0.23147841  | 5.31428511 |
| H | -5.58286472 | -5.78639027 | 2.22888511 |
| H | 0.00112964  | -1.07056224 | 8.45363990 |
| H | 0.31491800  | -7.08843092 | 5.36823990 |
| C | -0.71662933 | -0.31601869 | 3.66328925 |
| C | -1.83352324 | -2.23248305 | 1.88978655 |
| C | -0.04518050 | -1.54573820 | 3.43232069 |
| C | -1.94652511 | -0.04453136 | 3.00750646 |
| C | -0.60362746 | -2.50397038 | 2.54556934 |
| C | -2.50497207 | -1.00276354 | 2.12075511 |
| C | -0.15818237 | 0.64221349  | 4.55004061 |
| C | 1.18471528  | -1.81722553 | 4.08810349 |
| C | -2.61797394 | 1.18518815  | 3.23847502 |
| C | -2.39197020 | -3.19071523 | 1.00303519 |
| C | 0.06782137  | -3.73368989 | 2.31460078 |
| C | -3.73486785 | -0.73127621 | 1.46497231 |
| C | 1.74316223  | -0.85899335 | 4.97485484 |
| C | -2.05952698 | 2.14342033  | 4.12522637 |
| C | -0.49062559 | -4.69192207 | 1.42784943 |
| C | -4.29331480 | -1.68950839 | 0.57822096 |
| C | 1.07171343  | 0.37072620  | 5.20582344 |
| C | -0.82963118 | 1.87193304  | 4.78100920 |
| C | -1.72052139 | -4.42043478 | 0.77206660 |
| C | -3.62186600 | -2.91922794 | 0.34725236 |
| C | 1.85616392  | -3.04694489 | 3.85713489 |
| C | -3.84786954 | 1.45667534  | 2.58269227 |

|   |             |             |             |
|---|-------------|-------------|-------------|
| C | 1.29771696  | -4.00517707 | 2.97038353  |
| C | -4.40631649 | 0.49844315  | 1.69594091  |
| H | 1.50038044  | 1.10627059  | 5.88649874  |
| H | -0.40096417 | 2.60747743  | 5.46168450  |
| H | -2.14918840 | -5.15597917 | 0.09139129  |
| H | -4.05053301 | -3.65477233 | -0.33342294 |
| H | 2.80023894  | -3.25534013 | 4.36051749  |
| H | 1.81312493  | -4.94911678 | 2.79309076  |
| H | -4.36327750 | 2.40061504  | 2.75998504  |
| H | -5.35039151 | 0.70683839  | 1.19255831  |
| H | 2.68723709  | -1.06738840 | 5.47823744  |
| H | 0.02478217  | -5.63586167 | 1.25055658  |
| H | -2.57493474 | 3.08735993  | 4.30251922  |
| H | -5.23738966 | -1.48111334 | 0.07483836  |
| C | 4.31613939  | -1.38981737 | -4.50902957 |
| C | 3.94285911  | -4.15340693 | -3.97159670 |
| C | 5.18035583  | -2.06004423 | -3.60331108 |
| C | 3.26528281  | -2.10138530 | -5.14603163 |
| C | 4.99371569  | -3.44183901 | -3.33459465 |
| C | 3.07864268  | -3.48318008 | -4.87731520 |
| C | 4.50277953  | -0.00802259 | -4.77774601 |
| C | 6.23121241  | -1.34847630 | -2.96630903 |
| C | 2.40106638  | -1.43115844 | -6.05175012 |
| C | 3.75621898  | -5.53520171 | -3.70288027 |
| C | 5.85793213  | -4.11206586 | -2.42887616 |
| C | 2.02778610  | -4.19474800 | -5.51431725 |
| C | 6.41785255  | 0.03331848  | -3.23502546 |

|    |            |             |             |
|----|------------|-------------|-------------|
| C  | 2.58770651 | -0.04936366 | -6.32046656 |
| C  | 5.67129199 | -5.49386064 | -2.16015972 |
| C  | 1.84114596 | -5.57654278 | -5.24560082 |
| C  | 5.55363611 | 0.70354539  | -4.14074396 |
| C  | 3.63856310 | 0.66220432  | -5.68346451 |
| C  | 4.62043541 | -6.20542863 | -2.79716177 |
| C  | 2.70536239 | -6.24676970 | -4.33988231 |
| C  | 7.09542866 | -2.01870316 | -2.06059068 |
| C  | 1.35020998 | -2.14272636 | -6.68875203 |
| C  | 6.90878852 | -3.40049794 | -1.79187425 |
| C  | 1.16356985 | -3.52452114 | -6.42003559 |
| H  | 5.69690213 | 1.76421880  | -4.34701220 |
| H  | 3.78182911 | 1.72287773  | -5.88973275 |
| H  | 4.47716939 | -7.26610203 | -2.59089353 |
| H  | 2.56209638 | -7.30744310 | -4.13361407 |
| H  | 7.90207217 | -1.47249958 | -1.57162426 |
| H  | 7.57216600 | -3.91496789 | -1.09663957 |
| H  | 0.68683251 | -1.62825642 | -7.38398671 |
| H  | 0.35692634 | -4.07072472 | -6.90900201 |
| H  | 7.22449588 | 0.57952211  | -2.74605920 |
| H  | 6.33466928 | -6.00833065 | -1.46492518 |
| H  | 1.92432923 | 0.46510634  | -7.01570110 |
| H  | 1.03450263 | -6.12274642 | -5.73456708 |
| Cs | 0.20465800 | 0.10074000  | 0.48149700  |

145

n = 4, Energy = -386.500172487918 (54.0)

|   |             |             |            |
|---|-------------|-------------|------------|
| C | -3.60639401 | -1.61434381 | 0.72560210 |
|---|-------------|-------------|------------|

|   |             |             |             |
|---|-------------|-------------|-------------|
| C | -4.38771032 | -4.24398511 | 1.46053813  |
| C | -3.87760590 | -1.92051434 | 2.08541966  |
| C | -3.72584027 | -2.62299393 | -0.26674744 |
| C | -4.26826406 | -3.23533499 | 2.45288767  |
| C | -4.11649842 | -3.93781457 | 0.10072058  |
| C | -3.21573585 | -0.29952316 | 0.35813409  |
| C | -3.75815964 | -0.91186423 | 3.07776920  |
| C | -3.45462837 | -2.31682339 | -1.62656500 |
| C | -4.77836848 | -5.55880576 | 1.82800615  |
| C | -4.53947595 | -3.54150553 | 3.81270523  |
| C | -4.23594468 | -4.94646469 | -0.89162897 |
| C | -3.36750149 | 0.40295642  | 2.71030118  |
| C | -3.06397022 | -1.00200274 | -1.99403301 |
| C | -4.93013411 | -4.85632618 | 4.18017325  |
| C | -4.62660284 | -6.26128534 | -0.52416095 |
| C | -3.09628957 | 0.70912701  | 1.35048361  |
| C | -2.94452394 | 0.00664743  | -1.00168349 |
| C | -5.04958039 | -5.86497635 | 3.18782372  |
| C | -4.89781475 | -6.56745593 | 0.83565662  |
| C | -4.02937152 | -1.21803483 | 4.43758653  |
| C | -3.57407465 | -3.32547344 | -2.61891431 |
| C | -4.42002968 | -2.53285548 | 4.80505454  |
| C | -3.96473280 | -4.64029409 | -2.25144630 |
| H | -2.79641819 | 1.71839070  | 1.06841311  |
| H | -2.64465255 | 1.01591112  | -1.28375399 |
| H | -5.34945177 | -6.87424004 | 3.46989423  |
| H | -5.19768614 | -7.57671962 | 1.11772713  |

|   |             |             |             |
|---|-------------|-------------|-------------|
| H | -3.93768390 | -0.44378926 | 5.19931971  |
| H | -4.62821347 | -2.76787371 | 5.84885826  |
| H | -3.36589085 | -3.09045521 | -3.66271803 |
| H | -4.05642043 | -5.41453966 | -3.01317948 |
| H | -3.27581383 | 1.17720198  | 3.47203412  |
| H | -5.13831791 | -5.09134453 | 5.22397675  |
| H | -2.85578642 | -0.76698439 | -3.03783652 |
| H | -4.71829050 | -7.03553090 | -1.28589389 |
| C | -1.31383719 | -7.12203369 | 1.04016627  |
| C | -1.48605231 | -6.31701885 | 3.75823407  |
| C | -1.62127434 | -8.07679395 | 2.04531070  |
| C | -1.09250760 | -5.76476602 | 1.39405573  |
| C | -1.70738190 | -7.67428653 | 3.40434460  |
| C | -1.17861516 | -5.36225860 | 2.75308964  |
| C | -1.22772964 | -7.52454111 | -0.31886763 |
| C | -1.84260393 | -9.43406162 | 1.69142124  |
| C | -0.78507046 | -4.81000576 | 0.38891130  |
| C | -1.57215986 | -5.91451144 | 5.11726797  |
| C | -2.01481904 | -8.62904678 | 4.40948904  |
| C | -0.95728557 | -4.00499093 | 3.10697910  |
| C | -1.75649637 | -9.83656904 | 0.33238733  |
| C | -0.69896290 | -5.21251318 | -0.97012260 |
| C | -2.10092660 | -8.22653936 | 5.76852294  |
| C | -1.04339313 | -3.60248351 | 4.46601300  |
| C | -1.44905922 | -8.88180880 | -0.67275716 |
| C | -0.92029249 | -6.56978087 | -1.32401213 |
| C | -1.87959701 | -6.86927167 | 6.12241246  |



|   |             |              |             |
|---|-------------|--------------|-------------|
| C | -1.35083028 | -4.55724375  | 5.47115749  |
| C | -2.15004102 | -10.38882165 | 2.69656561  |
| C | -0.56374092 | -3.45273832  | 0.74280083  |
| C | -2.23614858 | -9.98631423  | 4.05559951  |
| C | -0.64984848 | -3.05023090  | 2.10183473  |
| H | -1.38296258 | -9.19077575  | -1.71595919 |
| H | -0.85419584 | -6.87874782  | -2.36721415 |
| H | -1.94569366 | -6.56030473  | 7.16561449  |
| H | -1.41692692 | -4.24827680  | 6.51435952  |
| H | -2.31993488 | -11.43066806 | 2.42491805  |
| H | -2.47213909 | -10.71919366 | 4.82715410  |
| H | -0.32775041 | -2.71985889  | -0.02875376 |
| H | -0.47995462 | -2.00838449  | 2.37348228  |
| H | -1.92639018 | -10.87841524 | 0.06073966  |
| H | -2.33691706 | -8.95941855  | 6.54007752  |
| H | -0.46297244 | -4.47963399  | -1.74167718 |
| H | -0.87349932 | -2.56063730  | 4.73766068  |
| C | 1.77551668  | 2.63609979   | -1.44262270 |
| C | 0.72370336  | 3.56417941   | 1.02678137  |
| C | 0.41514429  | 3.03371632   | -1.35494070 |
| C | 2.60998241  | 2.70252307   | -0.29560266 |
| C | -0.11076237 | 3.49775613   | -0.12023867 |
| C | 2.08407575  | 3.16656288   | 0.93909937  |
| C | 2.30142334  | 2.17205998   | -2.67732474 |
| C | -0.41932144 | 2.96729305   | -2.50196074 |
| C | 3.97035480  | 2.30490653   | -0.38328466 |
| C | 0.19779670  | 4.02821922   | 2.26148341  |

|   |             |             |             |
|---|-------------|-------------|-------------|
| C | -1.47113476 | 3.89537266  | -0.03255667 |
| C | 2.91854148  | 3.23298615  | 2.08611941  |
| C | 0.10658522  | 2.50325324  | -3.73666278 |
| C | 4.49626146  | 1.84086673  | -1.61798670 |
| C | -1.99704142 | 4.35941247  | 1.20214537  |
| C | 2.39263482  | 3.69702596  | 3.32082145  |
| C | 1.46695763  | 2.10563669  | -3.82434483 |
| C | 3.66179575  | 1.77444343  | -2.76500679 |
| C | -1.16257571 | 4.42583577  | 2.34916546  |
| C | 1.03226241  | 4.09464251  | 3.40850350  |
| C | -1.77969361 | 3.36490955  | -2.41427865 |
| C | 4.80482031  | 2.37132984  | 0.76373528  |
| C | -2.30560027 | 3.82894935  | -1.17957661 |
| C | 4.27891365  | 2.83536965  | 1.99843732  |
| H | 1.87064653  | 1.74943713  | -4.77210902 |
| H | 4.06548465  | 1.41824388  | -3.71277098 |
| H | -1.56626461 | 4.78203532  | 3.29692965  |
| H | 0.62857351  | 4.45084207  | 4.35626769  |
| H | -2.42023428 | 3.31392267  | -3.29473776 |
| H | -3.34982988 | 4.13416207  | -1.11227143 |
| H | 5.84904992  | 2.06611713  | 0.69643010  |
| H | 4.91945432  | 2.88635653  | 2.87889643  |
| H | -0.53395521 | 2.45226631  | -4.61712185 |
| H | -3.04127084 | 4.66462517  | 1.26945070  |
| H | 5.54049088  | 1.53565403  | -1.68529203 |
| H | 3.03317525  | 3.74801289  | 4.20128052  |
| C | 2.65157983  | -3.43434003 | 2.91054055  |

|   |            |             |             |
|---|------------|-------------|-------------|
| C | 2.56288960 | -5.52058973 | 0.98562607  |
| C | 2.83297636 | -3.13817409 | 1.53366688  |
| C | 2.42583819 | -4.77363081 | 3.32495699  |
| C | 2.78863125 | -4.18129894 | 0.57120964  |
| C | 2.38149308 | -5.81675566 | 2.36249975  |
| C | 2.69592494 | -2.39121518 | 3.87299779  |
| C | 3.05871800 | -1.79888331 | 1.11925044  |
| C | 2.24444166 | -5.06979675 | 4.70183066  |
| C | 2.51854449 | -6.56371458 | 0.02316883  |
| C | 2.97002777 | -3.88513301 | -0.80566404 |
| C | 2.15575143 | -7.15604645 | 2.77691618  |
| C | 3.10306311 | -0.75575846 | 2.08170768  |
| C | 2.28878677 | -4.02667190 | 5.66428790  |
| C | 2.92568266 | -4.92825786 | -1.76812128 |
| C | 2.11140632 | -8.19917130 | 1.81445894  |
| C | 2.92166659 | -1.05192435 | 3.45858139  |
| C | 2.51452842 | -2.68738107 | 5.24987150  |
| C | 2.69994102 | -6.26754869 | -1.35370488 |
| C | 2.29280285 | -7.90300541 | 0.43758523  |
| C | 3.24011449 | -1.50271753 | -0.25762306 |
| C | 2.01870006 | -6.40908737 | 5.11624692  |
| C | 3.19576938 | -2.54584238 | -1.22008030 |
| C | 1.97435494 | -7.45221222 | 4.15378968  |
| H | 2.95570614 | -0.25121588 | 4.19736896  |
| H | 2.54856797 | -1.88667260 | 5.98865907  |
| H | 2.66590146 | -7.06825716 | -2.09249244 |
| H | 2.25876329 | -8.70371388 | -0.30120233 |

|    |            |             |             |
|----|------------|-------------|-------------|
| H  | 3.41339506 | -0.47467029 | -0.57573150 |
| H  | 3.33501039 | -2.31850370 | -2.27697638 |
| H  | 1.87945904 | -6.63642605 | 6.17314300  |
| H  | 1.80107437 | -8.48025946 | 4.47189812  |
| H  | 3.27634365 | 0.27228867  | 1.76359946  |
| H  | 3.06492363 | -4.70091938 | -2.82501722 |
| H  | 2.14954580 | -4.25401037 | 6.72118385  |
| H  | 1.93812578 | -9.22721842 | 2.13256717  |
| Cs | 0.20465800 | 0.10074000  | 0.48149700  |

145

n = 4, Energy = -384.955205062682 (55.5)

|   |             |            |             |
|---|-------------|------------|-------------|
| C | 8.36691795  | 6.74557643 | 1.39463527  |
| C | 6.19046468  | 8.07724347 | 2.64175739  |
| C | 7.52433840  | 7.59692300 | 0.63196313  |
| C | 8.12127086  | 6.56006338 | 2.78086847  |
| C | 6.43611176  | 8.26275652 | 1.25552419  |
| C | 7.03304422  | 7.22589690 | 3.40442953  |
| C | 9.45514458  | 6.07974291 | 0.77107421  |
| C | 7.76998548  | 7.78243605 | -0.75427007 |
| C | 8.96385041  | 5.70871681 | 3.54354062  |
| C | 5.10223804  | 8.74307699 | 3.26531845  |
| C | 5.59353221  | 9.11410309 | 0.49285205  |
| C | 6.78739714  | 7.04038385 | 4.79066274  |
| C | 8.85821212  | 7.11660254 | -1.37783113 |
| C | 10.05207704 | 5.04288329 | 2.91997956  |
| C | 4.50530558  | 9.77993661 | 1.11641311  |
| C | 5.69917050  | 7.70621737 | 5.41422380  |

|   |             |             |             |
|---|-------------|-------------|-------------|
| C | 9.70079171  | 6.26525594  | -0.61515902 |
| C | 10.29772417 | 5.22839631  | 1.53374633  |
| C | 4.25965845  | 9.59442359  | 2.50264634  |
| C | 4.85659091  | 8.55756396  | 4.65155168  |
| C | 6.92740599  | 8.63378252  | -1.51694201 |
| C | 8.71820326  | 5.52320386  | 4.92977361  |
| C | 5.83917936  | 9.29961604  | -0.89338095 |
| C | 7.62997663  | 6.18903738  | 5.55333467  |
| H | 10.53612057 | 5.75415840  | -1.09380798 |
| H | 11.13305303 | 4.71729878  | 1.05509737  |
| H | 3.42432959  | 10.10552112 | 2.98129529  |
| H | 4.02126206  | 9.06866150  | 5.13020064  |
| H | 7.11596608  | 8.77618341  | -2.58102252 |
| H | 5.19241050  | 9.95311452  | -1.47881245 |
| H | 9.36497212  | 4.86970538  | 5.51520512  |
| H | 7.44141654  | 6.04663649  | 6.61741519  |
| H | 9.04677231  | 7.25900330  | -2.44191147 |
| H | 3.85853673  | 10.43343502 | 0.53098184  |
| H | 10.69884589 | 4.38938488  | 3.50541083  |
| H | 5.51061031  | 7.56381660  | 6.47830413  |
| C | 2.28996722  | 2.63160829  | -0.24367378 |
| C | 1.77950802  | 2.26378716  | 2.52575550  |
| C | 1.19751573  | 3.29823580  | 0.37159654  |
| C | 3.12718912  | 1.78107021  | 0.52577054  |
| C | 0.94228613  | 3.11432524  | 1.75631118  |
| C | 2.87195952  | 1.59715965  | 1.91048518  |
| C | 2.54519682  | 2.81551885  | -1.62838842 |

|   |             |             |             |
|---|-------------|-------------|-------------|
| C | 0.36029384  | 4.14877388  | -0.39784778 |
| C | 4.21964061  | 1.11444270  | -0.08949979 |
| C | 1.52427842  | 2.07987660  | 3.91047014  |
| C | -0.15016537 | 3.78095275  | 2.37158150  |
| C | 3.70918141  | 0.74662157  | 2.67992949  |
| C | 0.61552344  | 4.33268444  | -1.78256242 |
| C | 4.47487021  | 1.29835326  | -1.47421443 |
| C | -0.40539497 | 3.59704219  | 3.75629614  |
| C | 3.45395181  | 0.56271101  | 4.06464413  |
| C | 1.70797494  | 3.66605693  | -2.39783280 |
| C | 3.63764833  | 2.14889134  | -2.24365880 |
| C | 0.43182692  | 2.74650410  | 4.52574052  |
| C | 2.36150030  | 1.22933851  | 4.67991451  |
| C | -0.73215747 | 4.81540124  | 0.21742256  |
| C | 5.05686232  | 0.26390477  | 0.67994452  |
| C | -0.98738707 | 4.63149068  | 1.60213720  |
| C | 4.80163271  | 0.07999420  | 2.06465916  |
| H | 1.90389061  | 3.80722771  | -3.46074750 |
| H | 3.83356400  | 2.29006212  | -3.30657351 |
| H | 0.23591125  | 2.60533332  | 5.58865522  |
| H | 2.16558463  | 1.08816773  | 5.74282922  |
| H | -1.37481378 | 5.46827912  | -0.37320727 |
| H | -1.82595907 | 5.14319777  | 2.07442219  |
| H | 5.89543432  | -0.24780232 | 0.20765953  |
| H | 5.44428903  | -0.57288368 | 2.65528899  |
| H | -0.02713268 | 4.98556218  | -2.37319229 |
| H | -1.24396679 | 4.10874912  | 4.22858121  |

|   |             |             |             |
|---|-------------|-------------|-------------|
| H | 5.31344204  | 0.78664632  | -1.94649949 |
| H | 4.09660792  | -0.09016674 | 4.65527401  |
| C | -0.07607366 | -3.09032323 | -0.49517490 |
| C | 0.46404979  | -2.84605508 | 2.28226983  |
| C | 1.26370467  | -3.12949273 | -0.02628275 |
| C | -1.14579026 | -2.92901964 | 0.42465531  |
| C | 1.53376639  | -3.00735866 | 1.36243962  |
| C | -0.87572854 | -2.80688557 | 1.81337768  |
| C | -0.34613538 | -3.21245730 | -1.88389727 |
| C | 2.33342127  | -3.29079632 | -0.94611296 |
| C | -2.48556859 | -2.88985013 | -0.04423685 |
| C | 0.73411151  | -2.72392101 | 3.67099220  |
| C | 2.87354472  | -3.04652817 | 1.83133178  |
| C | -1.94544514 | -2.64558199 | 2.73320789  |
| C | 2.06335955  | -3.41293039 | -2.33483532 |
| C | -2.75563032 | -3.01198421 | -1.43295921 |
| C | 3.14360645  | -2.92439410 | 3.22005414  |
| C | -1.67538342 | -2.52344792 | 4.12193025  |
| C | 0.72358121  | -3.37376089 | -2.80372754 |
| C | -1.68591372 | -3.17328779 | -2.35278948 |
| C | 2.07388986  | -2.76309051 | 4.13988441  |
| C | -0.33560508 | -2.56261742 | 4.59082247  |
| C | 3.67319937  | -3.32996581 | -0.47722076 |
| C | -3.55528496 | -2.72854657 | 0.87559332  |
| C | 3.94326110  | -3.20783173 | 0.91150161  |
| C | -3.28522324 | -2.60641250 | 2.26431569  |
| H | 0.51628032  | -3.46751168 | -3.86971860 |

|   |             |             |             |
|---|-------------|-------------|-------------|
| H | -1.89321462 | -3.26703859 | -3.41878054 |
| H | 2.28119075  | -2.66933971 | 5.20587547  |
| H | -0.12830419 | -2.46886662 | 5.65681353  |
| H | 4.49431995  | -3.45378336 | -1.18328766 |
| H | 4.97168259  | -3.23789847 | 1.27142589  |
| H | -4.58370646 | -2.69847983 | 0.51566904  |
| H | -4.10634382 | -2.48259495 | 2.97038259  |
| H | 2.88447989  | -3.53674792 | -3.04090224 |
| H | 4.17202772  | -2.95446081 | 3.57997852  |
| H | -3.78405159 | -2.98191749 | -1.79288359 |
| H | -2.49650375 | -2.39963038 | 4.82799717  |
| C | 4.09801677  | 5.25241611  | 1.90831458  |
| C | 5.77438986  | 3.54643671  | 3.43965618  |
| C | 5.18720144  | 4.58451096  | 1.28865375  |
| C | 3.84701865  | 5.06733156  | 3.29364621  |
| C | 6.02538798  | 3.73152126  | 2.05432454  |
| C | 4.68520519  | 4.21434186  | 4.05931701  |
| C | 3.25983022  | 6.10540581  | 1.14264379  |
| C | 5.43819956  | 4.76959551  | -0.09667788 |
| C | 2.75783398  | 5.73523670  | 3.91330705  |
| C | 6.61257641  | 2.69344702  | 4.20532697  |
| C | 7.11457265  | 3.06361612  | 1.43466371  |
| C | 4.43420707  | 4.02925731  | 5.44464864  |
| C | 4.60001302  | 5.62258521  | -0.86234868 |
| C | 1.91964743  | 6.58822640  | 3.14763625  |
| C | 7.95275920  | 2.21062642  | 2.20033451  |
| C | 5.27239362  | 3.17626761  | 6.21031944  |



|    |            |            |             |
|----|------------|------------|-------------|
| C  | 3.51082831 | 6.29049039 | -0.24268788 |
| C  | 2.17064552 | 6.77331099 | 1.76230459  |
| C  | 7.70176111 | 2.02554183 | 3.58566617  |
| C  | 6.36157832 | 2.50836243 | 5.59065863  |
| C  | 6.52738410 | 4.10169041 | -0.71633852 |
| C  | 2.50683599 | 5.55015211 | 5.29863849  |
| C  | 7.36557065 | 3.24870072 | 0.04933227  |
| C  | 3.34502253 | 4.69716241 | 6.06430928  |
| H  | 2.86743163 | 6.94525006 | -0.83042106 |
| H  | 1.52724884 | 7.42807065 | 1.17457140  |
| H  | 8.34515780 | 1.37078217 | 4.17339936  |
| H  | 7.00497500 | 1.85360276 | 6.17839182  |
| H  | 6.72005171 | 4.24376236 | -1.77972698 |
| H  | 8.20163500 | 2.73601292 | -0.42632294 |
| H  | 1.67077163 | 6.06283990 | 5.77429369  |
| H  | 3.15235493 | 4.55509046 | 7.12769774  |
| H  | 4.79268046 | 5.76465724 | -1.92573698 |
| H  | 8.78882346 | 1.69793864 | 1.72467952  |
| H  | 1.08358317 | 7.10091418 | 3.62329123  |
| H  | 5.07972618 | 3.03419558 | 7.27370774  |
| Cs | 0.20465800 | 0.10074000 | 0.48149700  |

181

n = 5, Energy = -517.944067561807 (19.5)

|   |            |            |             |
|---|------------|------------|-------------|
| C | 5.26941055 | 4.35163907 | -1.50910878 |
| C | 5.03252050 | 4.64933995 | 1.30529290  |
| C | 5.97899498 | 3.48049585 | -0.64077734 |
| C | 4.44138110 | 5.37163274 | -0.97023939 |

|   |            |            |             |
|---|------------|------------|-------------|
| C | 5.86054995 | 3.62934629 | 0.76642350  |
| C | 4.32293608 | 5.52048318 | 0.43696145  |
| C | 5.38785558 | 4.20278863 | -2.91630962 |
| C | 6.80702443 | 2.46050218 | -1.17964673 |
| C | 3.73179668 | 6.24277597 | -1.83857084 |
| C | 4.91407547 | 4.79819039 | 2.71249373  |
| C | 6.57013437 | 2.75820306 | 1.63475495  |
| C | 3.49490663 | 6.54047685 | 0.97583084  |
| C | 6.92546945 | 2.31165174 | -2.58684757 |
| C | 3.85024171 | 6.09392553 | -3.24577167 |
| C | 6.45168934 | 2.90705350 | 3.04195579  |
| C | 3.37646160 | 6.68932729 | 2.38303168  |
| C | 6.21588504 | 3.18279496 | -3.45517907 |
| C | 4.67827117 | 5.07393186 | -3.78464113 |
| C | 5.62365988 | 3.92704717 | 3.58082524  |
| C | 4.08604601 | 5.81818407 | 3.25136318  |
| C | 7.51660870 | 1.58935913 | -0.31131531 |
| C | 2.90376738 | 7.26276946 | -1.29970141 |
| C | 7.39816367 | 1.73820957 | 1.09588553  |
| C | 2.78532235 | 7.41161990 | 0.10749943  |
| H | 6.30680411 | 3.06853653 | -4.53535431 |
| H | 4.76919023 | 4.95967342 | -4.86481636 |
| H | 5.53274082 | 4.04130560 | 4.66100048  |
| H | 3.99512695 | 5.93244250 | 4.33153842  |
| H | 8.15220883 | 0.80640617 | -0.72495451 |
| H | 7.94284473 | 1.06951505 | 1.76242168  |
| H | 2.35908633 | 7.93146398 | -1.96623757 |

|   |             |            |             |
|---|-------------|------------|-------------|
| H | 2.14972222  | 8.19457286 | 0.52113863  |
| H | 7.56106944  | 1.52869895 | -3.00048686 |
| H | 6.99637024  | 2.23835917 | 3.70849197  |
| H | 3.30556081  | 6.76261986 | -3.91230786 |
| H | 2.74086161  | 7.47228008 | 2.79667097  |
| C | 7.84332738  | 6.87221674 | 1.45957602  |
| C | 9.50314328  | 4.82297123 | 0.40543963  |
| C | 7.97175449  | 6.71522759 | 0.05413625  |
| C | 8.54480822  | 6.00458313 | 2.33794760  |
| C | 8.80166244  | 5.69060484 | -0.47293195 |
| C | 9.37471617  | 4.97996037 | 1.81087940  |
| C | 7.01341943  | 7.89683949 | 1.98664422  |
| C | 7.27027365  | 7.58286120 | -0.82423533 |
| C | 8.41638111  | 6.16157227 | 3.74338738  |
| C | 10.33305123 | 3.79834847 | -0.12162857 |
| C | 8.93008955  | 5.53361569 | -1.87837172 |
| C | 10.07619701 | 4.11232676 | 2.68925098  |
| C | 6.44036571  | 8.60748396 | -0.29716713 |
| C | 7.58647316  | 7.18619503 | 4.27045557  |
| C | 9.75999750  | 4.50899293 | -2.40543992 |
| C | 10.90610495 | 3.08770401 | 2.16218279  |
| C | 6.31193856  | 8.76447315 | 1.10827266  |
| C | 6.88499229  | 8.05382868 | 3.39208402  |
| C | 10.46147837 | 3.64135928 | -1.52706837 |
| C | 11.03453210 | 2.93071482 | 0.75674299  |
| C | 7.39870082  | 7.42587199 | -2.22967488 |
| C | 9.11786189  | 5.29393873 | 4.62175873  |

|   |             |             |             |
|---|-------------|-------------|-------------|
| C | 8.22860877  | 6.40124923  | -2.75674308 |
| C | 9.94776984  | 4.26931598  | 4.09469054  |
| H | 5.67489658  | 9.55097931  | 1.51285316  |
| H | 6.24795030  | 8.84033484  | 3.79666451  |
| H | 11.09852036 | 2.85485312  | -1.93164886 |
| H | 11.67157409 | 2.14420866  | 0.35216249  |
| H | 6.86024014  | 8.09187249  | -2.90391793 |
| H | 8.32719014  | 6.28074348  | -3.83556667 |
| H | 9.01928052  | 5.41444448  | 5.70058232  |
| H | 10.48623053 | 3.60331548  | 4.76893358  |
| H | 5.90190504  | 9.27348443  | -0.97140994 |
| H | 9.85857896  | 4.38848707  | -3.48426331 |
| H | 7.48789170  | 7.30670089  | 5.34927896  |
| H | 11.44456562 | 2.42170353  | 2.83642559  |
| C | -2.21532649 | -0.61437509 | -1.64532434 |
| C | -3.59568047 | -2.52447724 | -0.06047981 |
| C | -2.04421876 | -2.00157988 | -1.89589386 |
| C | -3.07661121 | -0.18222137 | -0.60233255 |
| C | -2.73439575 | -2.95663096 | -1.10347160 |
| C | -3.76678820 | -1.13727245 | 0.19008972  |
| C | -1.52514951 | 0.34067598  | -2.43774661 |
| C | -1.18293404 | -2.43373360 | -2.93888565 |
| C | -3.24771894 | 1.20498342  | -0.35176303 |
| C | -4.28585746 | -3.47952831 | 0.73194246  |
| C | -2.56328802 | -4.34383575 | -1.35404112 |
| C | -4.62807292 | -0.70511873 | 1.23308151  |
| C | -0.49275706 | -1.47868253 | -3.73130792 |

|   |             |             |             |
|---|-------------|-------------|-------------|
| C | -2.55754195 | 2.16003449  | -1.14418529 |
| C | -3.25346501 | -5.29888682 | -0.56161885 |
| C | -5.31824991 | -1.66016980 | 2.02550377  |
| C | -0.66386476 | -0.09147769 | -3.48073843 |
| C | -1.69625721 | 1.72788082  | -2.18717712 |
| C | -4.11474975 | -4.86673315 | 0.48137297  |
| C | -5.14714220 | -3.04737464 | 1.77493428  |
| C | -1.01182641 | -3.82093822 | -3.18945505 |
| C | -4.10900356 | 1.63713696  | 0.69122864  |
| C | -1.70200340 | -4.77598929 | -2.39703279 |
| C | -4.79918055 | 0.68208589  | 1.48365090  |
| H | -0.13408104 | 0.64162486  | -4.08900620 |
| H | -1.16647349 | 2.46098337  | -2.79544488 |
| H | -4.64453347 | -5.59983570 | 1.08964074  |
| H | -5.67692592 | -3.78047719 | 2.38320205  |
| H | -0.35069935 | -4.15266189 | -3.99006150 |
| H | -1.57066012 | -5.84081560 | -2.58937140 |
| H | -4.24034684 | 2.70196327  | 0.88356725  |
| H | -5.46030761 | 1.01380956  | 2.28425735  |
| H | 0.16836993  | -1.81040599 | -4.53191427 |
| H | -3.12212185 | -6.36371299 | -0.75395731 |
| H | -2.68888511 | 3.22486066  | -0.95184684 |
| H | -5.97937689 | -1.32844634 | 2.82611012  |
| C | 2.19834581  | -0.38804545 | 4.51043170  |
| C | 2.13542646  | -2.38088054 | 2.48799532  |
| C | 3.41140166  | -0.87648185 | 3.95696493  |
| C | 0.95383029  | -0.89602659 | 4.05268029  |

|   |             |             |            |
|---|-------------|-------------|------------|
| C | 3.37994198  | -1.87289940 | 2.94574673 |
| C | 0.92237062  | -1.89244414 | 3.04146210 |
| C | 2.22980549  | 0.60837210  | 5.52164990 |
| C | 4.65591717  | -0.36850071 | 4.41471634 |
| C | -0.25922555 | -0.40759019 | 4.60614707 |
| C | 2.10396679  | -3.37729809 | 1.47677712 |
| C | 4.59299783  | -2.36133580 | 2.39227996 |
| C | -0.32214490 | -2.40042528 | 2.58371068 |
| C | 4.68737685  | 0.62791684  | 5.42593454 |
| C | -0.22776588 | 0.58882736  | 5.61736526 |
| C | 4.56153815  | -3.35775335 | 1.38106176 |
| C | -0.35360457 | -3.39684283 | 1.57249249 |
| C | 3.47432100  | 1.11635329  | 5.97940136 |
| C | 1.01674964  | 1.09680855  | 6.07511672 |
| C | 3.31702263  | -3.86573454 | 0.92331030 |
| C | 0.85945127  | -3.88527928 | 1.01902567 |
| C | 5.86897278  | -0.85693711 | 3.86124957 |
| C | -1.50374083 | -0.91557133 | 4.14839564 |
| C | 5.83751311  | -1.85335466 | 2.85003138 |
| C | -1.53520050 | -1.91198888 | 3.13717745 |
| H | 3.49846963  | 1.88120898  | 6.75561810 |
| H | 1.04089826  | 1.86166424  | 6.85133346 |
| H | 3.29287401  | -4.63059023 | 0.14709356 |
| H | 0.83530265  | -4.65013497 | 0.24280892 |
| H | 6.82427000  | -0.46700790 | 4.21262216 |
| H | 6.76866170  | -2.22828122 | 2.42518714 |
| H | -2.43488943 | -0.54064477 | 4.57323988 |

|   |             |             |             |
|---|-------------|-------------|-------------|
| H | -2.49049772 | -2.30191809 | 2.78580486  |
| H | 5.64267383  | 1.01784610  | 5.77730717  |
| H | 5.49268651  | -3.73267996 | 0.95621749  |
| H | -1.15891423 | 0.96375397  | 6.04220954  |
| H | -1.30890155 | -3.78677209 | 1.22111985  |
| C | 2.46297508  | 2.21182571  | -0.91687674 |
| C | 0.72757693  | 4.20249647  | -1.96149279 |
| C | 2.29827605  | 2.34432038  | -2.32105603 |
| C | 1.75997504  | 3.07466642  | -0.03500548 |
| C | 1.43057697  | 3.33965575  | -2.84336405 |
| C | 0.89227597  | 4.07000180  | -0.55731350 |
| C | 3.33067416  | 1.21649033  | -0.39456872 |
| C | 3.00127609  | 1.48147966  | -3.20292729 |
| C | 1.92467408  | 2.94217176  | 1.36917381  |
| C | -0.14012215 | 5.19783185  | -2.48380081 |
| C | 1.26587793  | 3.47215042  | -4.24754334 |
| C | 0.18927593  | 4.93284252  | 0.32455776  |
| C | 3.86897516  | 0.48614428  | -2.68061926 |
| C | 2.79237316  | 1.94683638  | 1.89148183  |
| C | 0.39817885  | 4.46748580  | -4.76985136 |
| C | -0.67842315 | 5.92817790  | -0.19775027 |
| C | 4.03367424  | 0.35364958  | -1.27643996 |
| C | 3.49537324  | 1.08399562  | 1.00961059  |
| C | -0.30482122 | 5.33032655  | -3.88798012 |
| C | -0.84312223 | 6.06067260  | -1.60192957 |
| C | 2.83657700  | 1.61397440  | -4.60710635 |
| C | 1.22167409  | 3.80501240  | 2.25104485  |

|    |             |             |             |
|----|-------------|-------------|-------------|
| C  | 1.96887792  | 2.60930978  | -5.12941438 |
| C  | 0.35397502  | 4.80034778  | 1.72873682  |
| H  | 4.69972491  | -0.41037543 | -0.87551339 |
| H  | 4.16142390  | 0.31997062  | 1.41053715  |
| H  | -0.97087189 | 6.09435156  | -4.28890668 |
| H  | -1.50917289 | 6.82469761  | -2.00285614 |
| H  | 3.37620383  | 0.95165295  | -5.28403578 |
| H  | 1.84245401  | 2.71101342  | -6.20727041 |
| H  | 1.34809800  | 3.70330876  | 3.32890088  |
| H  | -0.18565182 | 5.46266923  | 2.40566625  |
| H  | 4.40860198  | -0.17617713 | -3.35754845 |
| H  | 0.27175486  | 4.56918956  | -5.84770719 |
| H  | 2.91879716  | 1.84513262  | 2.96933766  |
| H  | -1.21804997 | 6.59049931  | 0.47917892  |
| Cs | 0.20465800  | 0.10074000  | 0.48149700  |

181

n = 5, Energy = -510.864568502620 (26.6)

|   |            |            |            |
|---|------------|------------|------------|
| C | 1.96804095 | 6.19148917 | 2.67226431 |
| C | 3.29194643 | 4.66279033 | 4.66624366 |
| C | 1.33093659 | 5.94431077 | 3.91701367 |
| C | 3.26709805 | 5.67431814 | 2.42450463 |
| C | 1.99288933 | 5.17996135 | 4.91400334 |
| C | 3.92905079 | 4.90996872 | 3.42149431 |
| C | 1.30608821 | 6.95583859 | 1.67527464 |
| C | 0.03187949 | 6.46148180 | 4.16477335 |
| C | 3.90420241 | 5.92149654 | 1.17975528 |
| C | 3.95389917 | 3.89844091 | 5.66323334 |



|   |             |            |             |
|---|-------------|------------|-------------|
| C | 1.35578497  | 4.93278296 | 6.15875269  |
| C | 5.22810789  | 4.39279770 | 3.17373463  |
| C | -0.63007325 | 7.22583122 | 3.16778367  |
| C | 3.24224967  | 6.68584596 | 0.18276561  |
| C | 2.01773771  | 4.16843353 | 7.15574237  |
| C | 5.89006063  | 3.62844828 | 4.17072430  |
| C | 0.00703108  | 7.47300965 | 1.92303428  |
| C | 1.94319254  | 7.20301702 | 0.43052524  |
| C | 3.31679484  | 3.65126248 | 6.90798273  |
| C | 5.25295630  | 3.38126985 | 5.41547370  |
| C | -0.60522468 | 6.21430338 | 5.40952255  |
| C | 5.20325932  | 5.40432554 | 0.93199575  |
| C | 0.05672806  | 5.44995395 | 6.40651223  |
| C | 5.86521206  | 4.63997612 | 1.92898542  |
| H | -0.50108755 | 8.05972854 | 1.15773942  |
| H | 1.43507391  | 7.78973591 | -0.33476961 |
| H | 3.82491347  | 3.06454358 | 7.67327758  |
| H | 5.76107493  | 2.79455096 | 6.18076855  |
| H | -1.60238832 | 6.61128680 | 5.59970431  |
| H | -0.43231690 | 5.26021842 | 7.36198893  |
| H | 5.69230428  | 5.59406108 | -0.02348095 |
| H | 6.86237570  | 4.24299270 | 1.73880366  |
| H | -1.62723673 | 7.62281465 | 3.35796524  |
| H | 1.52869297  | 3.97869794 | 8.11121896  |
| H | 3.73129441  | 6.87558156 | -0.77271099 |
| H | 6.88722411  | 3.23146485 | 3.98054273  |
| C | 3.05850429  | 0.56858824 | 4.38045626  |

|   |             |             |            |
|---|-------------|-------------|------------|
| C | 1.32630154  | 2.20946141  | 2.84012889 |
| C | 3.45504194  | 1.00269948  | 3.08789856 |
| C | 1.79586526  | 0.95491358  | 4.90285027 |
| C | 2.58894056  | 1.82313607  | 2.31773488 |
| C | 0.92976389  | 1.77535016  | 4.13268659 |
| C | 3.92460566  | -0.25184834 | 5.15061994 |
| C | 4.71768096  | 0.61637414  | 2.56550455 |
| C | 1.39932761  | 0.52080234  | 6.19540797 |
| C | 0.46020017  | 3.02989799  | 2.06996521 |
| C | 2.98547821  | 2.25724731  | 1.02517718 |
| C | -0.33287513 | 2.16167550  | 4.65508060 |
| C | 5.58378234  | -0.20406244 | 3.33566823 |
| C | 2.26542899  | -0.29963425 | 6.96557165 |
| C | 2.11937684  | 3.07768390  | 0.25501350 |
| C | -1.19897651 | 2.98211209  | 3.88491692 |
| C | 5.18724472  | -0.63817372 | 4.62822596 |
| C | 3.52806805  | -0.68595962 | 6.44317767 |
| C | 0.85673778  | 3.46400927  | 0.77740748 |
| C | -0.80243889 | 3.41622337  | 2.59235919 |
| C | 5.11421845  | 1.05048538  | 1.27294703 |
| C | 0.13668875  | 0.90712768  | 6.71780180 |
| C | 4.24811708  | 1.87092197  | 0.50278335 |
| C | -0.72941262 | 1.72756426  | 5.94763812 |
| H | 5.85206898  | -1.26794543 | 5.21940792 |
| H | 4.19289231  | -1.31573134 | 7.03435962 |
| H | 0.19191352  | 4.09378099  | 0.18622553 |
| H | -1.46726316 | 4.04599508  | 2.00117723 |

|   |             |             |             |
|---|-------------|-------------|-------------|
| H | 6.08342736  | 0.75393986  | 0.87195439  |
| H | 4.55250165  | 2.20414823  | -0.48939131 |
| H | -0.16769583 | 0.57390142  | 7.70997646  |
| H | -1.69862154 | 2.02410979  | 6.34863076  |
| H | 6.55299112  | -0.50060800 | 2.93467580  |
| H | 2.42376122  | 3.41091019  | -0.73716101 |
| H | 1.96104461  | -0.63286054 | 7.95774616  |
| H | -2.16818530 | 3.27865765  | 4.28590935  |
| C | -1.54753434 | -4.20162005 | -0.48626855 |
| C | 0.20682328  | -3.11265064 | 1.46359670  |
| C | -0.22069700 | -3.84503901 | -0.84508984 |
| C | -1.99719287 | -4.01371638 | 0.84748536  |
| C | 0.65648181  | -3.30055430 | 0.12984278  |
| C | -1.12001406 | -3.46923168 | 1.82241798  |
| C | -2.42471315 | -4.74610475 | -1.46120118 |
| C | 0.22896153  | -4.03294267 | -2.17884375 |
| C | -3.32403021 | -4.37029743 | 1.20630665  |
| C | 1.08400209  | -2.56816593 | 2.43852932  |
| C | 1.98331914  | -2.94397326 | -0.22897850 |
| C | -1.56967259 | -3.28132802 | 3.15617190  |
| C | -0.64821728 | -4.57742738 | -3.15377638 |
| C | -4.20120902 | -4.91478213 | 0.23137402  |
| C | 2.86049795  | -2.39948856 | 0.74595412  |
| C | -0.69249378 | -2.73684331 | 4.13110452  |
| C | -1.97505466 | -4.93400844 | -2.79495513 |
| C | -3.75155052 | -5.10268582 | -1.10237993 |
| C | 2.41083946  | -2.21158487 | 2.07970807  |

|   |             |             |             |
|---|-------------|-------------|-------------|
| C | 0.63434359  | -2.38026225 | 3.77228327  |
| C | 1.55579869  | -3.67636165 | -2.53766488 |
| C | -3.77368856 | -4.18239375 | 2.54006039  |
| C | 2.43297750  | -3.13187694 | -1.56273225 |
| C | -2.89650976 | -3.63790904 | 3.51499302  |
| H | -2.64838202 | -5.35195795 | -3.54331887 |
| H | -4.42487789 | -5.52063532 | -1.85074367 |
| H | 3.08416682  | -1.79363536 | 2.82807181  |
| H | 1.30767096  | -1.96231274 | 4.52064701  |
| H | 1.90095916  | -3.82059756 | -3.56146198 |
| H | 3.45146540  | -2.85816330 | -1.83816554 |
| H | -4.79217647 | -4.45610738 | 2.81549368  |
| H | -3.24167022 | -3.49367312 | 4.53879012  |
| H | -0.30305702 | -4.72166333 | -4.17757336 |
| H | 3.87898572  | -2.12577491 | 0.47052104  |
| H | -5.21969679 | -5.18849577 | 0.50680710  |
| H | -1.03765404 | -2.59260735 | 5.15490150  |
| C | 3.86580816  | 0.84387853  | -5.00849812 |
| C | 5.33144262  | 2.81231258  | -3.57923870 |
| C | 3.62663718  | 2.2242071   | -5.25102391 |
| C | 4.83779638  | 0.44955337  | -4.05134262 |
| C | 4.35945441  | 3.20663774  | -4.53639420 |
| C | 5.57061361  | 1.43377040  | -3.33671291 |
| C | 3.13299093  | -0.14033850 | -5.72312784 |
| C | 2.65464896  | 2.61674587  | -6.20817942 |
| C | 5.07696736  | -0.92898882 | -3.80881683 |
| C | 6.06425985  | 3.79652961  | -2.86460898 |

|   |             |             |             |
|---|-------------|-------------|-------------|
| C | 4.12028342  | 4.58517993  | -4.77891999 |
| C | 6.54260182  | 1.03944524  | -2.37955740 |
| C | 1.92183173  | 1.63252884  | -6.92280913 |
| C | 4.34415013  | -1.91320585 | -4.52344654 |
| C | 4.85310065  | 5.56939695  | -4.06429028 |
| C | 7.27541905  | 2.02366227  | -1.66492769 |
| C | 2.16100269  | 0.25398661  | -6.68028337 |
| C | 3.37216189  | -1.51888073 | -5.48060207 |
| C | 5.82508890  | 5.17507184  | -3.10713474 |
| C | 7.03624810  | 3.40220450  | -1.90745345 |
| C | 2.41547809  | 3.99528788  | -6.45070509 |
| C | 6.04895546  | -1.32331380 | -2.85166144 |
| C | 3.14829532  | 4.97950491  | -5.73607538 |
| C | 6.78177269  | -0.33909677 | -2.13703173 |
| H | 1.59848808  | -0.50150389 | -7.22883713 |
| H | 2.80964728  | -2.27437123 | -6.02915584 |
| H | 6.38760350  | 5.93056234  | -2.55858098 |
| H | 7.59876270  | 4.15769499  | -1.35889968 |
| H | 1.66937440  | 4.29797414  | -7.18542311 |
| H | 2.96470630  | 6.03768175  | -5.92223957 |
| H | 6.23254449  | -2.38149064 | -2.66549725 |
| H | 7.52787638  | -0.64178303 | -1.40231371 |
| H | 1.17572812  | 1.93521488  | -7.65752706 |
| H | 4.66951177  | 6.62757366  | -4.25045432 |
| H | 4.52773901  | -2.97138256 | -4.33728250 |
| H | 8.02152266  | 1.72097622  | -0.93020976 |
| C | -1.55273692 | 3.30133468  | -1.73846424 |

|   |             |             |             |
|---|-------------|-------------|-------------|
| C | -3.47013148 | 1.85614971  | -0.22167883 |
| C | -1.65410759 | 1.89204520  | -1.87998175 |
| C | -2.41006352 | 3.98803168  | -0.83855403 |
| C | -2.61280487 | 1.16945271  | -1.12158904 |
| C | -3.36876081 | 3.26543920  | -0.08016132 |
| C | -0.59403964 | 4.02392717  | -2.49685695 |
| C | -0.79678099 | 1.20534820  | -2.77989197 |
| C | -2.30869285 | 5.39732117  | -0.69703652 |
| C | -4.42882876 | 1.13355722  | 0.53671388  |
| C | -2.71417555 | -0.23983678 | -1.26310655 |
| C | -4.22608741 | 3.95213620  | 0.81974890  |
| C | 0.16191630  | 1.92794068  | -3.53828467 |
| C | -1.34999557 | 6.11991366  | -1.45542923 |
| C | -3.67287283 | -0.96242927 | -0.50471384 |
| C | -5.18478469 | 3.22954371  | 1.57814160  |
| C | 0.26328701  | 3.33723020  | -3.39676720 |
| C | -0.49266892 | 5.43321669  | -2.35533947 |
| C | -4.53019948 | -0.27573230 | 0.39519640  |
| C | -5.28615541 | 1.82025419  | 1.43662413  |
| C | -0.89815173 | -0.20394109 | -2.92140937 |
| C | -3.16601938 | 6.08401797  | 0.20287360  |
| C | -1.85684901 | -0.92653358 | -2.16301667 |
| C | -4.12471666 | 5.36142548  | 0.96126630  |
| H | 0.99918841  | 3.89189624  | -3.97891368 |
| H | 0.24323248  | 5.98788272  | -2.93748596 |
| H | -5.26610087 | -0.83039833 | 0.97734289  |
| H | -6.02205681 | 1.26558815  | 2.01877061  |

|    |             |             |             |
|----|-------------|-------------|-------------|
| H  | -0.24006295 | -0.73105364 | -3.61218558 |
| H  | -1.93466171 | -2.00831222 | -2.27164633 |
| H  | -3.08820669 | 7.16579661  | 0.31150325  |
| H  | -4.78280545 | 5.88853803  | 1.65204251  |
| H  | 0.82000505  | 1.40082837  | -4.22906081 |
| H  | -3.75068564 | -2.04420774 | -0.61334337 |
| H  | -1.27218276 | 7.20169213  | -1.34679970 |
| H  | -5.84287345 | 3.75665603  | 2.26891774  |
| Cs | 0.20465800  | 0.10074000  | 0.48149700  |

181

n = 5, Energy = -508.185673612407 (29.2)

|   |             |             |             |
|---|-------------|-------------|-------------|
| C | -0.84602633 | -2.99569709 | -0.35717635 |
| C | -0.98256605 | -2.89011179 | 2.47757376  |
| C | -2.10485432 | -2.87694467 | 0.28908215  |
| C | 0.34453179  | -3.06165686 | 0.41394020  |
| C | -2.17312417 | -2.82415202 | 1.70645721  |
| C | 0.27626193  | -3.00886421 | 1.83131526  |
| C | -0.77775648 | -3.04848975 | -1.77455140 |
| C | -3.29541244 | -2.81098491 | -0.48203440 |
| C | 1.60335977  | -3.18040928 | -0.23231830 |
| C | -1.05083590 | -2.83731913 | 3.89494881  |
| C | -3.43195215 | -2.70539960 | 2.35271571  |
| C | 1.46682006  | -3.07482397 | 2.60243181  |
| C | -3.22714258 | -2.86377756 | -1.89940945 |
| C | 1.67162963  | -3.23320193 | -1.64969335 |
| C | -3.50022201 | -2.65260695 | 3.77009076  |
| C | 1.39855020  | -3.02203132 | 4.01980686  |

|   |             |             |             |
|---|-------------|-------------|-------------|
| C | -1.96831460 | -2.98252998 | -2.54566801 |
| C | 0.48107151  | -3.16724217 | -2.42080996 |
| C | -2.30966389 | -2.71856671 | 4.54120737  |
| C | 0.13972222  | -2.90327890 | 4.66606542  |
| C | -4.55424019 | -2.69223251 | 0.16422411  |
| C | 2.79391766  | -3.24636903 | 0.53879824  |
| C | -4.62251004 | -2.63943985 | 1.58159917  |
| C | 2.72564780  | -3.19357637 | 1.95617329  |
| H | -1.91591028 | -3.02305392 | -3.63365304 |
| H | 0.53347583  | -3.20776610 | -3.50879499 |
| H | -2.36206821 | -2.67804277 | 5.62919239  |
| H | 0.08731789  | -2.86275496 | 5.75405044  |
| H | -5.46811940 | -2.64160141 | -0.42768933 |
| H | -5.58879359 | -2.54828482 | 2.07767086  |
| H | 3.76020121  | -3.33752406 | 0.04272655  |
| H | 3.63952702  | -3.24420747 | 2.54808674  |
| H | -4.14102156 | -2.81314649 | -2.49132295 |
| H | -4.46650533 | -2.56145193 | 4.26616253  |
| H | 2.63791294  | -3.32435695 | -2.14576512 |
| H | 2.31242918  | -3.07266239 | 4.61172035  |
| C | 5.11911242  | 3.63988482  | -2.67469292 |
| C | 3.88827359  | 5.80044835  | -1.30261402 |
| C | 5.54139671  | 3.98033517  | -1.36237832 |
| C | 4.08140871  | 4.37971624  | -3.30096807 |
| C | 4.92597730  | 5.06061693  | -0.67633887 |
| C | 3.46598930  | 5.45999801  | -2.61492862 |
| C | 5.73453183  | 2.55960306  | -3.36073238 |



|   |            |            |             |
|---|------------|------------|-------------|
| C | 6.57910042 | 3.24050375 | -0.73610317 |
| C | 3.65912442 | 4.03926590 | -4.61328268 |
| C | 3.27285418 | 6.88073012 | -0.61657456 |
| C | 5.34826159 | 5.40106728 | 0.63597573  |
| C | 2.42828559 | 6.19982943 | -3.24120377 |
| C | 7.19451983 | 2.16022198 | -1.42214263 |
| C | 4.27454383 | 2.95898413 | -5.29932213 |
| C | 4.73284218 | 6.48134904 | 1.32201519  |
| C | 1.81286618 | 7.28011120 | -2.55516432 |
| C | 6.77223556 | 1.81977159 | -2.73445726 |
| C | 5.31224756 | 2.21915267 | -4.67304701 |
| C | 3.69513844 | 7.22118051 | 0.69574007  |
| C | 2.23515044 | 7.62056159 | -1.24284968 |
| C | 7.00138457 | 3.58095413 | 0.57621124  |
| C | 2.62142085 | 4.77909728 | -5.23955764 |
| C | 6.38596516 | 4.66123590 | 1.26225069  |
| C | 2.00600144 | 5.85937905 | -4.55351818 |
| H | 7.24463495 | 0.99054126 | -3.26106498 |
| H | 5.78464695 | 1.38992234 | -5.19965473 |
| H | 3.22273906 | 8.05041084 | 1.22234779  |
| H | 1.76275106 | 8.44979191 | -0.71624196 |
| H | 7.79793185 | 3.01305532 | 1.05694363  |
| H | 6.71011300 | 4.92256751 | 2.26959087  |
| H | 2.29727301 | 4.51776567 | -6.24689781 |
| H | 1.20945416 | 6.42727785 | -5.03425057 |
| H | 7.99106700 | 1.59232317 | -0.94141045 |
| H | 5.05698986 | 6.74268074 | 2.32935520  |

|   |             |             |             |
|---|-------------|-------------|-------------|
| H | 3.95039615  | 2.69765244  | -6.30666214 |
| H | 1.01631901  | 7.84801001  | -3.03589649 |
| C | -5.67887819 | 0.51107638  | 2.11278812  |
| C | -3.43209480 | 1.11528037  | 3.74143832  |
| C | -4.53258173 | 1.12465003  | 1.54188369  |
| C | -5.70178296 | 0.19960473  | 3.49801766  |
| C | -3.40919003 | 1.42675203  | 2.35620879  |
| C | -4.57839127 | 0.50170673  | 4.31234275  |
| C | -6.80226988 | 0.20897439  | 1.29846303  |
| C | -4.50967696 | 1.43612168  | 0.15665416  |
| C | -6.84807942 | -0.41396891 | 4.06892209  |
| C | -2.30870311 | 1.41738237  | 4.55576342  |
| C | -2.26289357 | 2.04032567  | 1.78530435  |
| C | -4.60129603 | 0.19023508  | 5.69757229  |
| C | -5.63306865 | 1.13401969  | -0.65767094 |
| C | -7.97147112 | -0.71607091 | 3.25459699  |
| C | -1.13950187 | 2.34242767  | 2.59962945  |
| C | -3.47790434 | 0.49233707  | 6.51189738  |
| C | -6.77936516 | 0.52044603  | -0.08676654 |
| C | -7.94856640 | -0.40459927 | 1.86936743  |
| C | -1.16240660 | 2.03095603  | 3.98485901  |
| C | -2.33160783 | 1.10591073  | 5.94099298  |
| C | -3.36338061 | 2.04969524  | -0.41425009 |
| C | -6.87098408 | -0.72544048 | 5.45415143  |
| C | -2.23998891 | 2.35179724  | 0.40007501  |
| C | -5.74759238 | -0.42333848 | 6.26847653  |
| H | -7.64168691 | 0.28855085  | -0.71184704 |

|   |             |             |             |
|---|-------------|-------------|-------------|
| H | -8.81088815 | -0.63649445 | 1.24428693  |
| H | -0.30008485 | 2.26285121  | 4.60993952  |
| H | -1.46928608 | 1.33780591  | 6.56607348  |
| H | -3.34579876 | 2.28878266  | -1.47756018 |
| H | -1.36008522 | 2.82277987  | -0.03815451 |
| H | -7.75088777 | -1.19642311 | 5.89238095  |
| H | -5.76517423 | -0.66242591 | 7.33178662  |
| H | -5.61548696 | 1.37310701  | -1.72098087 |
| H | -0.25959825 | 2.81341022  | 2.16140015  |
| H | -8.85137475 | -1.18705346 | 3.69282629  |
| H | -3.49548603 | 0.25324975  | 7.57520732  |
| C | -3.75614442 | 5.39492590  | 1.07513932  |
| C | -3.67411723 | 4.87323040  | 3.86560610  |
| C | -4.88256735 | 4.82350604  | 1.72402360  |
| C | -2.58870789 | 5.70549801  | 1.82148843  |
| C | -4.84155376 | 4.56265829  | 3.11925699  |
| C | -2.54769430 | 5.44465026  | 3.21672183  |
| C | -3.79715802 | 5.65577365  | -0.32009407 |
| C | -6.05000388 | 4.51293394  | 0.97767449  |
| C | -1.46228496 | 6.27691786  | 1.17260416  |
| C | -3.63310363 | 4.61238265  | 5.26083949  |
| C | -5.96797669 | 3.99123844  | 3.76814127  |
| C | -1.38025777 | 5.75522236  | 3.96307094  |
| C | -6.09101747 | 4.77378169  | -0.41755890 |
| C | -1.50329856 | 6.53776561  | -0.22262923 |
| C | -5.92696309 | 3.73039069  | 5.16337466  |
| C | -1.33924417 | 5.49437461  | 5.35830433  |

|   |             |             |             |
|---|-------------|-------------|-------------|
| C | -4.96459455 | 5.34520155  | -1.06644324 |
| C | -2.67073509 | 6.22719351  | -0.96897841 |
| C | -4.75952656 | 4.04096278  | 5.90972383  |
| C | -2.46566710 | 4.92295475  | 6.00718867  |
| C | -7.17642659 | 3.94151417  | 1.62655877  |
| C | -0.29484866 | 6.58748988  | 1.91895326  |
| C | -7.13541299 | 3.68066642  | 3.02179216  |
| C | -0.25383506 | 6.32664213  | 3.31418665  |
| H | -4.99607681 | 5.54542974  | -2.13743220 |
| H | -2.70221735 | 6.42742171  | -2.03996737 |
| H | -4.72804429 | 3.84073459  | 6.98071279  |
| H | -2.43418484 | 4.72272655  | 7.07817762  |
| H | -8.07255753 | 3.70311724  | 1.05365695  |
| H | -8.00006167 | 3.24204128  | 3.51987942  |
| H | 0.56980002  | 7.02611502  | 1.42086600  |
| H | 0.64229588  | 6.56503906  | 3.88708847  |
| H | -6.98714820 | 4.53538485  | -0.99046077 |
| H | -6.79161154 | 3.29176562  | 5.66146198  |
| H | -0.63865011 | 6.97639068  | -0.72071656 |
| H | -0.44311345 | 5.73277144  | 5.93120620  |
| C | 3.16225588  | 0.07381831  | -2.69731087 |
| C | 3.15045329  | 1.56364687  | -0.27948724 |
| C | 4.06397891  | -0.26091072 | -1.65268073 |
| C | 2.25463155  | 1.15346163  | -2.53302919 |
| C | 4.05807761  | 0.48400355  | -0.44376892 |
| C | 2.24873025  | 1.89837590  | -1.32411738 |
| C | 3.16815717  | -0.67109596 | -3.90622268 |

|   |             |             |             |
|---|-------------|-------------|-------------|
| C | 4.97160324  | -1.34055404 | -1.81696241 |
| C | 1.35290852  | 1.48819067  | -3.57765933 |
| C | 3.14455199  | 2.30856114  | 0.92942458  |
| C | 4.95980065  | 0.14927451  | 0.60086122  |
| C | 1.34110593  | 2.97801922  | -1.15983570 |
| C | 4.97750453  | -2.08546831 | -3.02587423 |
| C | 1.35880981  | 0.74327639  | -4.78657114 |
| C | 4.95389935  | 0.89418879  | 1.80977303  |
| C | 1.33520463  | 3.72293349  | 0.04907612  |
| C | 4.07578150  | -1.75073931 | -4.07050441 |
| C | 2.26643414  | -0.33636695 | -4.95085287 |
| C | 4.04627502  | 1.97383213  | 1.97405476  |
| C | 2.23692766  | 3.38820449  | 1.09370630  |
| C | 5.87332610  | -1.67528294 | -0.77233236 |
| C | 0.44528437  | 2.56783384  | -3.41337756 |
| C | 5.86742480  | -0.93036867 | 0.43657945  |
| C | 0.43938307  | 3.31274812  | -2.20446575 |
| H | 4.08031137  | -2.32253967 | -4.99847189 |
| H | 2.27096401  | -0.90816732 | -5.87882034 |
| H | 4.04174515  | 2.54563250  | 2.90202224  |
| H | 2.23239779  | 3.96000485  | 2.02167378  |
| H | 6.57002371  | -2.50402330 | -0.89843590 |
| H | 6.55959255  | -1.18730860 | 1.23844349  |
| H | -0.24688338 | 2.82477378  | -4.21524160 |
| H | -0.25731455 | 4.14148848  | -2.07836221 |
| H | 5.67420198  | -2.91420857 | -3.15197790 |
| H | 5.64606692  | 0.63724902  | 2.61163704  |

|    |            |            |             |
|----|------------|------------|-------------|
| H  | 0.66664224 | 1.00021616 | -5.58843515 |
| H  | 0.63850719 | 4.55167375 | 0.17517979  |
| Cs | 0.20465800 | 0.10074000 | 0.48149700  |

181

n = 5, Energy = -476.820309156298 (60.6)

|   |            |            |             |
|---|------------|------------|-------------|
| C | 4.28756190 | 4.41991195 | -3.28292108 |
| C | 2.50028323 | 3.26384105 | -5.16301005 |
| C | 4.63381266 | 3.20995240 | -3.94057478 |
| C | 3.04767180 | 5.05183604 | -3.56531187 |
| C | 3.74017333 | 2.63191695 | -4.88061926 |
| C | 2.15403246 | 4.47380059 | -4.50535635 |
| C | 5.18120123 | 4.99794740 | -2.34287659 |
| C | 5.87370276 | 2.57802831 | -3.65818399 |
| C | 2.70142103 | 6.26179559 | -2.90765817 |
| C | 1.60664389 | 2.68580560 | -6.10305454 |
| C | 4.08642409 | 1.42195741 | -5.53827296 |
| C | 0.91414236 | 5.10572469 | -4.78774714 |
| C | 6.76734210 | 3.15606376 | -2.71813950 |
| C | 3.59506037 | 6.83983104 | -1.96761368 |
| C | 3.19278476 | 0.84392196 | -6.47831745 |
| C | 0.02050303 | 4.52768924 | -5.72779163 |
| C | 6.42109137 | 4.36602333 | -2.06048576 |
| C | 4.83495050 | 6.20790697 | -1.68522285 |
| C | 1.95289462 | 1.47584603 | -6.76070828 |
| C | 0.36675376 | 3.31772967 | -6.38544537 |
| C | 6.21995337 | 1.36806895 | -4.31583765 |
| C | 1.46153109 | 6.89371950 | -3.19004899 |

|   |             |             |             |
|---|-------------|-------------|-------------|
| C | 5.32631404  | 0.79003350  | -5.25588214 |
| C | 0.56789175  | 6.31568405  | -4.13009348 |
| H | 7.10705392  | 4.80972658  | -1.33890235 |
| H | 5.52091306  | 6.65161021  | -0.96363944 |
| H | 1.26693207  | 1.03214278  | -7.48229168 |
| H | -0.31920880 | 2.87402642  | -7.10702878 |
| H | 7.17170008  | 0.88300039  | -4.09907288 |
| H | 5.59209812  | -0.13873835 | -5.76070086 |
| H | 1.19574701  | 7.82249135  | -2.68523027 |
| H | -0.38385496 | 6.80075260  | -4.34685825 |
| H | 7.71908869  | 2.67099541  | -2.50137466 |
| H | 3.45856865  | -0.08484973 | -6.98313617 |
| H | 3.32927648  | 7.76860273  | -1.46279496 |
| H | -0.93124356 | 5.01275758  | -5.94455647 |
| C | -2.43829577 | -4.78363162 | 6.26805056  |
| C | -3.75943534 | -2.58282364 | 5.05288225  |
| C | -1.78517541 | -4.03593794 | 5.25277324  |
| C | -3.75198591 | -4.43092131 | 6.67574372  |
| C | -2.44574519 | -2.93553395 | 4.64518908  |
| C | -4.41255570 | -3.33051732 | 6.06815957  |
| C | -1.77772599 | -5.88403561 | 6.87563471  |
| C | -0.47148526 | -4.38864825 | 4.84508007  |
| C | -4.40510628 | -5.17861499 | 7.69102104  |
| C | -4.42000512 | -1.48241965 | 4.44529810  |
| C | -1.79262483 | -2.18784027 | 3.62991177  |
| C | -5.72624584 | -2.97780701 | 6.47585274  |
| C | 0.18908452  | -5.48905224 | 5.45266422  |

|   |             |             |             |
|---|-------------|-------------|-------------|
| C | -3.74453649 | -6.27901898 | 8.29860519  |
| C | -2.45319461 | -1.08743629 | 3.02232761  |
| C | -6.38681562 | -1.87740302 | 5.86826859  |
| C | -0.46403582 | -6.23674596 | 6.46794157  |
| C | -2.43084632 | -6.63172933 | 7.89091205  |
| C | -3.76688479 | -0.73472593 | 3.43002076  |
| C | -5.73369529 | -1.12970930 | 4.85299124  |
| C | 0.18163491  | -3.64095461 | 3.82980289  |
| C | -5.71879623 | -4.82590464 | 8.09871407  |
| C | -0.47893488 | -2.54055062 | 3.22221874  |
| C | -6.37936601 | -3.72550065 | 7.49112992  |
| H | 0.04302125  | -7.08142222 | 6.93432656  |
| H | -1.92378926 | -7.47640559 | 8.35729705  |
| H | -4.27394185 | 0.10995033  | 2.96363576  |
| H | -6.24075235 | -0.28503304 | 4.38660625  |
| H | 1.19003095  | -3.91169704 | 3.51685528  |
| H | 0.02240405  | -1.96661670 | 2.44288608  |
| H | -6.22013516 | -5.39983856 | 8.87804673  |
| H | -7.38776206 | -3.45475822 | 7.80407753  |
| H | 1.19748040  | -5.75979476 | 5.13971677  |
| H | -1.95185590 | -0.51350236 | 2.24299507  |
| H | -4.24587520 | -6.85295290 | 9.07793774  |
| H | -7.39521151 | -1.60666050 | 6.18121603  |
| C | 1.09385451  | 0.60727359  | -2.97722894 |
| C | 1.72827153  | 2.67389598  | -1.13544001 |
| C | 2.32655205  | 0.57694223  | -2.27300110 |
| C | 0.17836547  | 1.67091614  | -2.76056231 |



|   |             |             |             |
|---|-------------|-------------|-------------|
| C | 2.64376056  | 1.61025343  | -1.35210663 |
| C | 0.49557398  | 2.70422733  | -1.83966784 |
| C | 0.77664600  | -0.42603760 | -3.89812340 |
| C | 3.24204109  | -0.48670032 | -2.48966773 |
| C | -1.05433207 | 1.70124750  | -3.46479015 |
| C | 2.04548004  | 3.70720717  | -0.21454554 |
| C | 3.87645811  | 1.57992207  | -0.64787880 |
| C | -0.41991505 | 3.76786988  | -1.62300122 |
| C | 2.92483258  | -1.52001151 | -3.41056219 |
| C | -1.37154058 | 0.66793630  | -4.38568461 |
| C | 4.19366662  | 2.61323326  | 0.27301567  |
| C | -0.10270654 | 4.80118108  | -0.70210675 |
| C | 1.69213502  | -1.48968020 | -4.11479007 |
| C | -0.45605156 | -0.39570629 | -4.60235128 |
| C | 3.27817760  | 3.67687586  | 0.48968234  |
| C | 1.12999102  | 4.77084976  | 0.00212113  |
| C | 4.47473842  | -0.51703157 | -1.78543994 |
| C | -1.96982090 | 2.76488994  | -3.24812347 |
| C | 4.79194693  | 0.51627962  | -0.86454547 |
| C | -1.65261239 | 3.79820114  | -2.32722901 |
| H | 1.44864399  | -2.28285565 | -4.82167382 |
| H | -0.69954259 | -1.18888174 | -5.30923503 |
| H | 3.52166862  | 4.47005131  | 1.19656608  |
| H | 1.37348204  | 5.56402522  | 0.70900487  |
| H | 5.17747304  | -1.33348965 | -1.95175446 |
| H | 5.73817260  | 0.49299708  | -0.32397617 |
| H | -2.91604657 | 2.78817248  | -3.78869277 |

|   |             |             |             |
|---|-------------|-------------|-------------|
| H | -2.35534701 | 4.61465922  | -2.16091448 |
| H | 3.62756697  | -2.33646953 | -3.57687681 |
| H | 5.13989209  | 2.58995087  | 0.81358496  |
| H | -2.31776606 | 0.69121869  | -4.92625390 |
| H | -0.80544094 | 5.61763910  | -0.53579214 |
| C | -2.25157717 | -3.40824284 | 0.15256537  |
| C | -3.66701584 | -4.96627185 | 2.05904865  |
| C | -3.58053344 | -3.05800018 | 0.50978434  |
| C | -1.63034024 | -4.53749999 | 0.74858804  |
| C | -4.28825278 | -3.83701469 | 1.46302598  |
| C | -2.33805957 | -5.31651450 | 1.70182968  |
| C | -1.54385784 | -2.62922833 | -0.80067626 |
| C | -4.20177038 | -1.92874303 | -0.08623832 |
| C | -0.30138397 | -4.88774265 | 0.39136907  |
| C | -4.37473518 | -5.74528636 | 3.01229028  |
| C | -5.61720905 | -3.48677204 | 1.82024495  |
| C | -1.71682264 | -6.44577166 | 2.29785234  |
| C | -3.49405104 | -1.14972852 | -1.03947996 |
| C | 0.40633537  | -4.10872814 | -0.56187257 |
| C | -6.32492838 | -4.26578655 | 2.77348659  |
| C | -2.42454197 | -7.22478617 | 3.25109398  |
| C | -2.16509474 | -1.49997114 | -1.39669897 |
| C | -0.21490154 | -2.97947095 | -1.15789527 |
| C | -5.70369148 | -5.39504374 | 3.36950929  |
| C | -3.75349827 | -6.87454355 | 3.60831299  |
| C | -5.53072646 | -1.57850052 | 0.27098067  |
| C | 0.31985278  | -6.01699966 | 0.98739171  |

|   |             |             |             |
|---|-------------|-------------|-------------|
| C | -6.23844579 | -2.35751503 | 1.22422231  |
| C | -0.38786656 | -6.79601417 | 1.94063335  |
| H | -1.62184542 | -0.90199524 | -2.12841258 |
| H | 0.32834779  | -2.38149505 | -1.88960889 |
| H | -6.24694080 | -5.99301963 | 4.10122291  |
| H | -4.29674760 | -7.47251944 | 4.34002660  |
| H | -6.00759149 | -0.71167629 | -0.18652972 |
| H | -7.25856021 | -2.08866675 | 1.49842562  |
| H | 1.33996719  | -6.28584793 | 0.71318840  |
| H | 0.08899847  | -7.66283840 | 2.39814374  |
| H | -3.97091585 | -0.28290440 | -1.49699036 |
| H | -7.34504264 | -3.99693845 | 3.04768996  |
| H | 1.42644962  | -4.37757623 | -0.83607594 |
| H | -1.94767716 | -8.09161029 | 3.70860438  |
| C | 0.97809698  | -0.30998584 | 5.30349139  |
| C | -1.61432426 | 0.45965911  | 6.17101562  |
| C | 0.35364692  | -1.00137479 | 6.37514597  |
| C | 0.30633642  | 0.76622558  | 4.66559893  |
| C | -0.94256369 | -0.61655231 | 6.80890808  |
| C | -0.98987420 | 1.15104806  | 5.09936104  |
| C | 2.27430760  | -0.69480832 | 4.86972928  |
| C | 1.02540749  | -2.07758621 | 7.01303843  |
| C | 0.93078647  | 1.45761453  | 3.59394435  |
| C | -2.91053487 | 0.84448159  | 6.60477773  |
| C | -1.56701375 | -1.30794126 | 7.88056266  |
| C | -1.66163476 | 2.22725948  | 4.46146858  |
| C | 2.32161810  | -2.46240869 | 6.57927632  |

|    |             |             |            |
|----|-------------|-------------|------------|
| C  | 2.22699709  | 1.07279205  | 3.16018224 |
| C  | -2.86322437 | -0.92311878 | 8.31432477 |
| C  | -2.95784538 | 2.61208196  | 4.89523069 |
| C  | 2.94606822  | -1.77101976 | 5.50762172 |
| C  | 2.89875771  | -0.00341939 | 3.79807468 |
| C  | -3.53498498 | 0.15309266  | 7.67643233 |
| C  | -3.58229549 | 1.92069303  | 5.96688529 |
| C  | 0.40095743  | -2.76897499 | 8.08469284 |
| C  | 0.25902592  | 2.53382578  | 2.95605206 |
| C  | -0.89525319 | -2.38415251 | 8.51845495 |
| C  | -1.03718470 | 2.91864826  | 3.38981417 |
| H  | 3.94104674  | -2.06641165 | 5.17466350 |
| H  | 3.89373623  | -0.29881128 | 3.46511646 |
| H  | -4.52996351 | 0.44848455  | 8.00939055 |
| H  | -4.57727401 | 2.21608492  | 6.29984351 |
| H  | 0.91660465  | -3.59508102 | 8.57434274 |
| H  | -1.37458460 | -2.91486662 | 9.34106312 |
| H  | 0.73835733  | 3.06453989  | 2.13344389 |
| H  | -1.55283192 | 3.74475429  | 2.90016427 |
| H  | 2.83726538  | -3.28851457 | 7.06892604 |
| H  | -3.34255584 | -1.45383270 | 9.13693279 |
| H  | 2.70632856  | 1.60350597  | 2.33757422 |
| H  | -3.47349265 | 3.43818784  | 4.40558097 |
| Cs | 0.20465800  | 0.10074000  | 0.48149700 |

181

n = 5, Energy = -472.350921319022 (65.1)

|   |             |             |            |
|---|-------------|-------------|------------|
| C | -2.32788067 | -1.67154275 | 1.71000805 |
|---|-------------|-------------|------------|

|   |             |             |             |
|---|-------------|-------------|-------------|
| C | -0.67154707 | -0.53614237 | 3.71824721  |
| C | -2.61190073 | -0.37529939 | 2.21546411  |
| C | -1.21569381 | -2.40008592 | 2.20867157  |
| C | -1.78373394 | 0.19240080  | 3.21958369  |
| C | -0.38752701 | -1.83238573 | 3.21279115  |
| C | -3.15604747 | -2.23924293 | 0.70588847  |
| C | -3.72408760 | 0.35324379  | 1.71680059  |
| C | -0.93167374 | -3.69632928 | 1.70321551  |
| C | 0.15661973  | 0.03155782  | 4.72236678  |
| C | -2.06775400 | 1.48864416  | 3.72503975  |
| C | 0.72465985  | -2.56092890 | 3.71145466  |
| C | -4.55225440 | -0.21445640 | 0.71268101  |
| C | -1.75984054 | -4.26402947 | 0.69909593  |
| C | -1.23958720 | 2.05634435  | 4.72915933  |
| C | 1.55282665  | -1.99322872 | 4.71557424  |
| C | -4.26823437 | -1.51069979 | 0.20722491  |
| C | -2.87202744 | -3.53548632 | 0.20043237  |
| C | -0.12740030 | 1.32780120  | 5.22782289  |
| C | 1.26880662  | -0.69698533 | 5.22103035  |
| C | -4.00810753 | 1.64948695  | 2.22225665  |
| C | 0.18051298  | -4.42487226 | 2.20187902  |
| C | -3.17994073 | 2.21718714  | 3.22637623  |
| C | 1.00867978  | -3.85717207 | 3.20599860  |
| H | -4.90393984 | -1.94646963 | -0.56354290 |
| H | -3.50773291 | -3.97125616 | -0.57033544 |
| H | 0.50830516  | 1.76357104  | 5.99859070  |
| H | 1.90451209  | -0.26121549 | 5.99179815  |

|   |             |             |             |
|---|-------------|-------------|-------------|
| H | -4.86182850 | 2.20872086  | 1.83947970  |
| H | -3.39795616 | 3.21219094  | 3.61436717  |
| H | 0.39852842  | -5.41987605 | 1.81388808  |
| H | 1.86240076  | -4.41640598 | 3.58877555  |
| H | -5.40597527 | 0.34477729  | 0.32990402  |
| H | -1.45760247 | 3.05134798  | 5.11715031  |
| H | -1.54182527 | -5.25903309 | 0.31110494  |
| H | 2.40654753  | -2.55246241 | 5.09835123  |
| C | 8.70094898  | 5.27342872  | -2.32452922 |
| C | 8.61964379  | 6.13967816  | 0.37891320  |
| C | 8.05739199  | 6.49397382  | -1.98911284 |
| C | 9.30385337  | 4.48600834  | -1.30822438 |
| C | 8.01673940  | 6.92709854  | -0.63739164 |
| C | 9.26320078  | 4.91913306  | 0.04349682  |
| C | 8.74160157  | 4.84030400  | -3.67625042 |
| C | 7.45448760  | 7.28139420  | -3.00541768 |
| C | 9.94741036  | 3.26546324  | -1.64364076 |
| C | 8.57899120  | 6.57280288  | 1.73063441  |
| C | 7.37318242  | 8.14764364  | -0.30197526 |
| C | 9.86610517  | 4.13171268  | 1.05980166  |
| C | 7.49514019  | 6.84826948  | -4.35713888 |
| C | 9.98806295  | 2.83233852  | -2.99536196 |
| C | 7.33252983  | 8.58076836  | 1.04974595  |
| C | 9.82545258  | 4.56483740  | 2.41152287  |
| C | 8.13869718  | 5.62772436  | -4.69255531 |
| C | 9.38515856  | 3.61975888  | -4.01166685 |
| C | 7.93543422  | 7.79334800  | 2.06605084  |

|   |             |             |             |
|---|-------------|-------------|-------------|
| C | 9.18189559  | 5.78538252  | 2.74693930  |
| C | 6.81093074  | 8.50193910  | -2.67000124 |
| C | 10.55031463 | 2.47804306  | -0.62733599 |
| C | 6.77027814  | 8.93506382  | -1.31828003 |
| C | 10.50966204 | 2.91116778  | 0.72438522  |
| H | 8.16990234  | 5.29525540  | -5.73014408 |
| H | 9.41636371  | 3.28728992  | -5.04925562 |
| H | 7.90422906  | 8.12581696  | 3.10363960  |
| H | 9.15069044  | 6.11785148  | 3.78452806  |
| H | 6.34813788  | 9.10636749  | -3.45012261 |
| H | 6.27628013  | 9.87196121  | -1.06081253 |
| H | 11.04431265 | 1.54114567  | -0.88480349 |
| H | 10.97245489 | 2.30673939  | 1.50450659  |
| H | 7.03234746  | 7.45269765  | -5.13726025 |
| H | 6.83853193  | 9.51766557  | 1.30721357  |
| H | 10.48206085 | 1.89544132  | -3.25282959 |
| H | 10.28824531 | 3.96040923  | 3.19164423  |
| C | -2.78722077 | -1.26706959 | 6.65399206  |
| C | -3.41840455 | -3.42031853 | 4.91309413  |
| C | -1.98122631 | -2.43615167 | 6.64950829  |
| C | -3.90880712 | -1.17461198 | 5.78802685  |
| C | -2.29681820 | -3.51277614 | 5.77905933  |
| C | -4.22439901 | -2.25123645 | 4.91757789  |
| C | -2.47162888 | -0.19044513 | 7.52444102  |
| C | -0.85963996 | -2.52860928 | 7.51547349  |
| C | -4.71480158 | -0.00552990 | 5.79251062  |
| C | -3.73399644 | -4.49694299 | 4.04264517  |

|   |             |             |             |
|---|-------------|-------------|-------------|
| C | -1.49082374 | -4.68185822 | 5.77457557  |
| C | -5.34598535 | -2.15877884 | 4.05161269  |
| C | -0.54404807 | -1.45198482 | 8.38592246  |
| C | -4.39920969 | 1.07109456  | 6.66295958  |
| C | -1.80641563 | -5.75848268 | 4.90412661  |
| C | -5.66157724 | -3.23540331 | 3.18116373  |
| C | -1.35004252 | -0.28290269 | 8.39040625  |
| C | -3.27762332 | 0.97863700  | 7.52892481  |
| C | -2.92800199 | -5.66602512 | 4.03816137  |
| C | -4.85558280 | -4.40448543 | 3.17667993  |
| C | -0.05364569 | -3.69769124 | 7.51098965  |
| C | -5.83638774 | 0.08692758  | 4.92654550  |
| C | -0.36923758 | -4.77431570 | 6.64054069  |
| C | -6.15197963 | -0.98969688 | 4.05609654  |
| H | -1.10779241 | 0.54352027  | 9.05856775  |
| H | -3.03537322 | 1.80505996  | 8.19708631  |
| H | -3.17025209 | -6.49244808 | 3.36999988  |
| H | -5.09783290 | -5.23090839 | 2.50851844  |
| H | 0.80729040  | -3.76866224 | 8.17570947  |
| H | 0.24944838  | -5.67170977 | 6.63709894  |
| H | -6.45507369 | 0.98432165  | 4.92998725  |
| H | -7.01291571 | -0.91872588 | 3.39137672  |
| H | 0.31688784  | -1.52295565 | 9.05064223  |
| H | -1.18772987 | -6.65587667 | 4.90068474  |
| H | -5.01789544 | 1.96848855  | 6.66640144  |
| H | -6.52251315 | -3.16443247 | 2.51644396  |
| C | 2.52567620  | 1.80329290  | -1.17571322 |



|   |            |             |             |
|---|------------|-------------|-------------|
| C | 3.17524959 | 1.37721169  | 1.55597284  |
| C | 3.24170165 | 0.63949164  | -0.78935295 |
| C | 2.13443744 | 2.75405355  | -0.19623046 |
| C | 3.56648835 | 0.42645104  | 0.57649008  |
| C | 2.45922413 | 2.54101295  | 1.16961257  |
| C | 2.20088950 | 2.01633350  | -2.54155625 |
| C | 3.63294041 | -0.31126902 | -1.76883572 |
| C | 1.41841198 | 3.91785481  | -0.58259072 |
| C | 3.50003629 | 1.16417109  | 2.92181587  |
| C | 4.28251381 | -0.73735022 | 0.96285034  |
| C | 2.06798537 | 3.49177361  | 2.14909534  |
| C | 3.30815372 | -0.09822842 | -3.13467875 |
| C | 1.09362528 | 4.13089541  | -1.94843375 |
| C | 4.60730051 | -0.95039082 | 2.32869337  |
| C | 2.39277207 | 3.27873301  | 3.51493837  |
| C | 2.59212824 | 1.06557285  | -3.52103907 |
| C | 1.48486403 | 3.18013476  | -2.92791657 |
| C | 4.21606176 | 0.00036983  | 3.30817619  |
| C | 3.10879754 | 2.11493174  | 3.90129869  |
| C | 4.34896576 | -1.47507007 | -1.38247539 |
| C | 1.02717333 | 4.86861526  | 0.39689198  |
| C | 4.67375246 | -1.68811067 | -0.01663237 |
| C | 1.35196002 | 4.65557466  | 1.76273501  |
| H | 2.34282016 | 1.22910401  | -4.56946782 |
| H | 1.23555594 | 3.34366592  | -3.97634533 |
| H | 4.46536985 | -0.16316133 | 4.35660495  |
| H | 3.35810563 | 1.95140058  | 4.94972744  |

|   |            |             |             |
|---|------------|-------------|-------------|
| H | 4.64928288 | -2.20487938 | -2.13433194 |
| H | 5.22337769 | -2.58145116 | 0.27993996  |
| H | 0.47754810 | 5.76195575  | 0.10031966  |
| H | 1.05164291 | 5.38538397  | 2.51459156  |
| H | 3.60847071 | -0.82803751 | -3.88653529 |
| H | 5.15692564 | -1.84373111 | 2.62526581  |
| H | 0.54400015 | 5.02423570  | -2.24500619 |
| H | 2.09245508 | 4.00854211  | 4.26679491  |
| C | 5.52982240 | 4.37577650  | 0.88006941  |
| C | 6.81468458 | 1.93409947  | 0.20705976  |
| C | 6.13038253 | 3.58597626  | 1.89591546  |
| C | 5.57169337 | 3.94473822  | -0.47228147 |
| C | 6.77281362 | 2.36513775  | 1.55941064  |
| C | 6.21412446 | 2.72389971  | -0.80878630 |
| C | 4.88739131 | 5.59661501  | 1.21657424  |
| C | 6.08851156 | 4.01701454  | 3.24826634  |
| C | 4.97113324 | 4.73453845  | -1.48812752 |
| C | 7.45711568 | 0.71326096  | -0.12944507 |
| C | 7.37337374 | 1.57533752  | 2.57525669  |
| C | 6.25599542 | 2.29286143  | -2.16113718 |
| C | 5.44608047 | 5.23785305  | 3.58477117  |
| C | 4.32870215 | 5.95537696  | -1.15162269 |
| C | 8.01580484 | 0.35449900  | 2.23875186  |
| C | 6.89842652 | 1.07202292  | -2.49764200 |
| C | 4.84552032 | 6.02765334  | 2.56892513  |
| C | 4.28683116 | 6.38641529  | 0.20072820  |
| C | 8.05767583 | -0.07653933 | 0.88640097  |

|    |            |             |             |
|----|------------|-------------|-------------|
| C  | 7.49898667 | 0.28222263  | -1.48179597 |
| C  | 6.68907163 | 3.22721434  | 4.26411217  |
| C  | 5.01300426 | 4.30350014  | -2.84047817 |
| C  | 7.33150272 | 2.00637583  | 3.92760734  |
| C  | 5.65543535 | 3.08266163  | -3.17698300 |
| H  | 4.35238662 | 6.96477581  | 2.82722812  |
| H  | 3.79369746 | 7.32353777  | 0.45903119  |
| H  | 8.55080953 | -1.01366180 | 0.62809798  |
| H  | 7.99212037 | -0.65489984 | -1.74009896 |
| H  | 6.65693125 | 3.55808176  | 5.30218442  |
| H  | 7.79249610 | 1.40012068  | 4.70737657  |
| H  | 4.55201089 | 4.90975529  | -3.62024741 |
| H  | 5.68757573 | 2.75179420  | -4.21505525 |
| H  | 5.41394001 | 5.56872056  | 4.62284321  |
| H  | 8.47679818 | -0.25175617 | 3.01852085  |
| H  | 3.86770880 | 6.56163213  | -1.93139169 |
| H  | 6.93056698 | 0.74115541  | -3.53571404 |
| Cs | 0.20465800 | 0.10074000  | 0.48149700  |

217

n = 6, Energy = -615.039616410233 (19.2)

|   |             |             |            |
|---|-------------|-------------|------------|
| C | -1.42158316 | 0.92538874  | 3.31837944 |
| C | -1.72120224 | -1.67226843 | 4.42653339 |
| C | -0.69408850 | 0.56181196  | 4.48240845 |
| C | -2.29888735 | -0.00986307 | 2.70842741 |
| C | -0.84389804 | -0.73701662 | 5.03648542 |
| C | -2.44869689 | -1.30869165 | 3.26250438 |
| C | -1.27177361 | 2.22421732  | 2.76430247 |

|   |             |             |            |
|---|-------------|-------------|------------|
| C | 0.18321570  | 1.49706376  | 5.09236048 |
| C | -3.02638201 | 0.35371371  | 1.54439840 |
| C | -1.87101178 | -2.97109701 | 4.98061036 |
| C | -0.11640338 | -1.10059340 | 6.20051443 |
| C | -3.32600109 | -2.24394346 | 2.65255235 |
| C | 0.33302524  | 2.79589235  | 4.53828351 |
| C | -2.87657247 | 1.65254229  | 0.99032143 |
| C | -0.26621292 | -2.39942198 | 6.75459140 |
| C | -3.47581063 | -3.54277204 | 3.20662932 |
| C | -0.39446941 | 3.15946918  | 3.37425448 |
| C | -1.99926827 | 2.58779415  | 1.60027344 |
| C | -1.14351713 | -3.33467384 | 6.14463939 |
| C | -2.74831598 | -3.90634887 | 4.37065835 |
| C | 0.91071020  | 1.13348693  | 6.25638931 |
| C | -3.90368605 | -0.58153804 | 0.93444654 |
| C | 0.76090066  | -0.16534165 | 6.81046629 |
| C | -4.05349559 | -1.88036662 | 1.48852351 |
| H | -0.27947477 | 4.15645727  | 2.94894189 |
| H | -1.88427362 | 3.58478224  | 1.17496085 |
| H | -1.25851177 | -4.33166193 | 6.56995197 |
| H | -2.86331062 | -4.90333696 | 4.79597094 |
| H | 1.58413391  | 1.85139154  | 6.72459199 |
| H | 1.31932971  | -0.44442524 | 7.70398159 |
| H | -4.46211511 | -0.30245445 | 0.04093123 |
| H | -4.72691930 | -2.59827123 | 1.02032084 |
| H | 1.00644880  | 3.51379695  | 5.00648598 |
| H | 0.29221597  | -2.67850568 | 7.64810656 |

|   |             |             |             |
|---|-------------|-------------|-------------|
| H | -3.43500136 | 1.93162599  | 0.09680627  |
| H | -4.14923419 | -4.26067664 | 2.73842684  |
| C | -2.08050879 | 1.54123438  | -2.74568277 |
| C | -0.74388888 | 3.73401506  | -1.53293399 |
| C | -0.67885547 | 1.48454485  | -2.52533222 |
| C | -2.81385214 | 2.69431425  | -2.35965893 |
| C | -0.01054552 | 2.58093519  | -1.91895783 |
| C | -2.14554219 | 3.79070460  | -1.75328454 |
| C | -2.74881874 | 0.44484404  | -3.35205717 |
| C | 0.05448788  | 0.33146498  | -2.91135606 |
| C | -4.21550546 | 2.75100379  | -2.58000949 |
| C | -0.07557892 | 4.83040540  | -0.92655960 |
| C | 1.39110779  | 2.52424566  | -1.69860727 |
| C | -2.87888555 | 4.94378447  | -1.36726070 |
| C | -0.61382207 | -0.76492536 | -3.51773045 |
| C | -4.88381541 | 1.65461345  | -3.18638388 |
| C | 2.05941775  | 3.62063600  | -1.09223288 |
| C | -2.21057559 | 6.04017481  | -0.76088631 |
| C | -2.01547541 | -0.70823588 | -3.73808103 |
| C | -4.15047208 | 0.50153353  | -3.57240774 |
| C | 1.32607442  | 4.77371592  | -0.70620902 |
| C | -0.80892225 | 5.98348532  | -0.54053573 |
| C | 1.45614099  | 0.27477556  | -2.69100549 |
| C | -4.94884861 | 3.90408354  | -2.19398566 |
| C | 2.12445094  | 1.37116590  | -2.08463110 |
| C | -4.28053865 | 5.00047388  | -1.58761127 |
| H | -2.52847387 | -1.54983124 | -4.20353741 |

|   |             |             |             |
|---|-------------|-------------|-------------|
| H | -4.66347054 | -0.34006183 | -4.03786412 |
| H | 1.83907288  | 5.61531128  | -0.24075264 |
| H | -0.29592379 | 6.82508068  | -0.07507935 |
| H | 2.01905955  | -0.61033512 | -2.98731958 |
| H | 3.20036802  | 1.32765068  | -1.91548876 |
| H | -6.02476568 | 3.94759877  | -2.36312800 |
| H | -4.84345721 | 5.88558456  | -1.29129718 |
| H | -0.05090375 | -1.65003597 | -3.81404456 |
| H | 3.13533465  | 3.57712093  | -0.92309051 |
| H | -5.95973231 | 1.69812851  | -3.35552626 |
| H | -2.77349391 | 6.92528542  | -0.46457221 |
| C | 0.59721691  | 1.77721169  | -6.03665202 |
| C | 1.08792233  | 4.31459360  | -4.85915436 |
| C | 1.90871156  | 2.12320318  | -5.61632865 |
| C | -0.46892504 | 2.69991115  | -5.86822656 |
| C | 2.15406428  | 3.39189413  | -5.02757982 |
| C | -0.22357232 | 3.96860210  | -5.27947773 |
| C | 0.35186419  | 0.50852073  | -6.62540085 |
| C | 2.97485350  | 1.20050371  | -5.78475412 |
| C | -1.78041969 | 2.35391966  | -6.28854993 |
| C | 1.33327505  | 5.58328455  | -4.27040553 |
| C | 3.46555893  | 3.73788562  | -4.60725646 |
| C | -1.28971426 | 4.89130157  | -5.11105227 |
| C | 2.72950079  | -0.06818724 | -6.37350294 |
| C | -2.02577240 | 1.08522870  | -6.87729875 |
| C | 3.71091164  | 5.00657658  | -4.01850763 |
| C | -1.04436155 | 6.15999252  | -4.52230344 |

|   |             |             |             |
|---|-------------|-------------|-------------|
| C | 1.41800612  | -0.41417879 | -6.79382634 |
| C | -0.95963047 | 0.16252918  | -7.04572424 |
| C | 2.64476971  | 5.92927610  | -3.85008214 |
| C | 0.26713312  | 6.50598407  | -4.10198005 |
| C | 4.28634793  | 1.54649526  | -5.36443077 |
| C | -2.84656140 | 3.27661906  | -6.12012444 |
| C | 4.53170064  | 2.81518622  | -4.77568194 |
| C | -2.60120869 | 4.54531002  | -5.53137561 |
| H | 1.22967201  | -1.38803306 | -7.24575323 |
| H | -1.14796459 | -0.81132509 | -7.49765114 |
| H | 2.83310383  | 6.90313037  | -3.39815525 |
| H | 0.45546723  | 7.47983835  | -3.65005315 |
| H | 5.10472458  | 0.83822590  | -5.49371511 |
| H | 5.53841143  | 3.08077124  | -4.45303934 |
| H | -3.85327219 | 3.01103404  | -6.44276705 |
| H | -3.41958534 | 5.25357938  | -5.40209127 |
| H | 3.54787720  | -0.77645660 | -6.50278733 |
| H | 4.71762221  | 5.27216171  | -3.69586502 |
| H | -3.03248297 | 0.81964357  | -7.19994136 |
| H | -1.86273796 | 6.86826188  | -4.39301905 |
| C | -3.72062973 | 2.62035192  | 5.50141828  |
| C | -5.55187002 | 1.79131838  | 3.49521243  |
| C | -4.29248516 | 1.32169352  | 5.55497021  |
| C | -4.06439444 | 3.50449355  | 4.44476342  |
| C | -5.20810530 | 0.90717676  | 4.55186728  |
| C | -4.98001459 | 3.08997678  | 3.44166050  |
| C | -2.80500958 | 3.03486869  | 6.50452120  |

|   |             |             |            |
|---|-------------|-------------|------------|
| C | -3.94872044 | 0.43755190  | 6.61162506 |
| C | -3.49253902 | 4.80315195  | 4.39121150 |
| C | -6.46749017 | 1.37680162  | 2.49210951 |
| C | -5.77996073 | -0.39148164 | 4.60541921 |
| C | -5.32377931 | 3.97411841  | 2.38500565 |
| C | -3.03310029 | 0.85206866  | 7.61472798 |
| C | -2.57691887 | 5.21766872  | 5.39431442 |
| C | -6.69558088 | -0.80599841 | 3.60231629 |
| C | -6.23939946 | 3.55960164  | 1.38190273 |
| C | -2.46124482 | 2.15072708  | 7.56117609 |
| C | -2.23315411 | 4.33352711  | 6.45096931 |
| C | -7.03934564 | 0.07814320  | 2.54566140 |
| C | -6.81125493 | 2.26094323  | 1.43545462 |
| C | -4.52057585 | -0.86110629 | 6.66517688 |
| C | -3.83630376 | 5.68729337  | 3.33455675 |
| C | -5.43619599 | -1.27562306 | 5.66207396 |
| C | -4.75192390 | 5.27277660  | 2.33145383 |
| H | -1.75840967 | 2.46891247  | 8.33116351 |
| H | -1.53031896 | 4.65171250  | 7.22095673 |
| H | -7.74218079 | -0.24004219 | 1.77567398 |
| H | -7.51409008 | 1.94275784  | 0.66546720 |
| H | -4.25670010 | -1.53977846 | 7.47627116 |
| H | -5.87515547 | -2.27248066 | 5.70318074 |
| H | -3.39734428 | 6.68415096  | 3.29344997 |
| H | -5.01579965 | 5.95144877  | 1.52035955 |
| H | -2.76922448 | 0.17339672  | 8.42582220 |
| H | -7.13454038 | -1.80285581 | 3.64342292 |



|   |             |             |              |
|---|-------------|-------------|--------------|
| H | -2.13795937 | 6.21452612  | 5.35320778   |
| H | -6.50327526 | 4.23827358  | 0.57080851   |
| C | 2.48390704  | 2.14482841  | -9.44471405  |
| C | 2.96677258  | 4.68613972  | -8.27246100  |
| C | 1.41572849  | 3.06620564  | -9.28205283  |
| C | 3.79351835  | 2.49410683  | -9.02124874  |
| C | 1.65716126  | 4.33686130  | -8.69592631  |
| C | 4.03495112  | 3.76476249  | -8.43512222  |
| C | 2.24247427  | 0.87417276  | -10.03084057 |
| C | 0.10611718  | 2.71692722  | -9.70551814  |
| C | 4.86169689  | 1.57272960  | -9.18390995  |
| C | 3.20820535  | 5.95679538  | -7.68633448  |
| C | 0.58898272  | 5.25823853  | -8.53326509  |
| C | 5.34456243  | 4.11404091  | -8.01165691  |
| C | -0.13531559 | 1.44627157  | -10.29164466 |
| C | 4.62026412  | 0.30207394  | -9.77003648  |
| C | 0.83041549  | 6.52889419  | -7.94713857  |
| C | 5.58599520  | 5.38469657  | -7.42553039  |
| C | 0.93286294  | 0.52489428  | -10.45430590 |
| C | 3.31065280  | -0.04720453 | -10.19350181 |
| C | 2.14002681  | 6.87817266  | -7.52367324  |
| C | 4.51781667  | 6.30607385  | -7.26286915  |
| C | -0.96206113 | 3.63830440  | -9.54285690  |
| C | 6.17130798  | 1.92200808  | -8.76044467  |
| C | -0.72062836 | 4.90896005  | -8.95673038  |
| C | 6.41274075  | 3.19266373  | -8.17431815  |
| H | 0.74753780  | -0.45046811 | -10.90421990 |

|   |             |             |              |
|---|-------------|-------------|--------------|
| H | 3.12532765  | -1.02256692 | -10.64341581 |
| H | 2.32535196  | 7.85353506  | -7.07375924  |
| H | 4.70314182  | 7.28143625  | -6.81295515  |
| H | -1.96732625 | 3.37019631  | -9.86791128  |
| H | -1.54056832 | 5.61621446  | -8.83187071  |
| H | 6.99124793  | 1.21475367  | -8.88530434  |
| H | 7.41800587  | 3.46077183  | -7.84926377  |
| H | -1.14058049 | 1.17816336  | -10.61669904 |
| H | 0.01047578  | 7.23614859  | -7.82227885  |
| H | 5.44020384  | -0.40518046 | -9.89489619  |
| H | 6.59126010  | 5.65280477  | -7.10047601  |
| C | 3.02416830  | -2.76418989 | -1.69500508  |
| C | 3.21577978  | -1.50898387 | 0.84533789   |
| C | 4.00047704  | -1.75738671 | -1.47236487  |
| C | 2.14366530  | -3.14339007 | -0.64747380  |
| C | 4.09628278  | -1.12978369 | -0.20219339  |
| C | 2.23947104  | -2.51578705 | 0.62269768   |
| C | 2.92836256  | -3.39179291 | -2.96517656  |
| C | 4.88098004  | -1.37818653 | -2.51989615  |
| C | 1.16735656  | -4.15019326 | -0.87011401  |
| C | 3.31158552  | -0.88138085 | 2.11550937   |
| C | 5.07259152  | -0.12298051 | 0.02044682   |
| C | 1.35896804  | -2.89498723 | 1.67022895   |
| C | 4.78517430  | -2.00578955 | -3.79006763  |
| C | 1.07155082  | -4.77779627 | -2.14028549  |
| C | 5.16839726  | 0.50462251  | 1.29061830   |
| C | 1.45477378  | -2.26738421 | 2.94040044   |

|    |             |             |             |
|----|-------------|-------------|-------------|
| C  | 3.80886555  | -3.01259276 | -4.01270789 |
| C  | 1.95205381  | -4.39859612 | -3.18781682 |
| C  | 4.28789426  | 0.12542236  | 2.33814963  |
| C  | 2.43108252  | -1.26058100 | 3.16304070  |
| C  | 5.85728860  | -0.37138348 | -2.29725586 |
| C  | 0.28685374  | -4.52939330 | 0.17741718  |
| C  | 5.95309434  | 0.25621953  | -1.02708438 |
| C  | 0.38265948  | -3.90179028 | 1.44758867  |
| H  | 3.73532453  | -3.49434435 | -4.98769863 |
| H  | 1.87851279  | -4.88034771 | -4.16280756 |
| H  | 4.36143529  | 0.60717395  | 3.31314037  |
| H  | 2.50462355  | -0.77882941 | 4.13803144  |
| H  | 6.53316773  | -0.08030725 | -3.10134683 |
| H  | 6.70251450  | 1.02904740  | -0.85618450 |
| H  | -0.46256643 | -5.30222116 | 0.00651731  |
| H  | -0.29321966 | -4.19286651 | 2.25167964  |
| H  | 5.46105324  | -1.71471348 | -4.59415857 |
| H  | 5.91781725  | 1.27745027  | 1.46151831  |
| H  | 0.32213083  | -5.55062403 | -2.31118550 |
| H  | 0.77889483  | -2.55846028 | 3.74449138  |
| Cs | 0.20465800  | 0.10074000  | 0.48149700  |

217

n = 6, Energy = -612.308190996917 (21.9)

|   |            |             |             |
|---|------------|-------------|-------------|
| C | 2.29297219 | -0.99953327 | -2.97147154 |
| C | 3.78913102 | -1.41159023 | -0.59295996 |
| C | 2.82093990 | -2.28475876 | -2.67847728 |
| C | 2.51308389 | 0.07966373  | -2.07521000 |

|   |            |             |             |
|---|------------|-------------|-------------|
| C | 3.56901931 | -2.49078723 | -1.48922149 |
| C | 3.26116330 | -0.12636475 | -0.88595421 |
| C | 1.54489277 | -0.79350480 | -4.16072733 |
| C | 2.60082819 | -3.36395576 | -3.57473882 |
| C | 1.98511618 | 1.36488921  | -2.36820426 |
| C | 4.53721043 | -1.61761870 | 0.59629583  |
| C | 4.09698702 | -3.77601271 | -1.19622723 |
| C | 3.48127501 | 0.95283226  | 0.01030732  |
| C | 1.85274878 | -3.15792729 | -4.76399461 |
| C | 1.23703677 | 1.57091769  | -3.55746005 |
| C | 4.84506644 | -3.98204119 | -0.00697144 |
| C | 4.22935442 | 0.74680378  | 1.19956311  |
| C | 1.32478104 | -1.87270179 | -5.05698891 |
| C | 1.01692503 | 0.49172069  | -4.45372163 |
| C | 5.06517817 | -2.90284419 | 0.88929014  |
| C | 4.75732217 | -0.53842171 | 1.49255742  |
| C | 3.12879587 | -4.64918101 | -3.28174450 |
| C | 2.20522791 | 2.44408599  | -1.47194278 |
| C | 3.87687529 | -4.85520949 | -2.09248871 |
| C | 2.95330733 | 2.23805751  | -0.28268699 |
| H | 0.75055109 | -1.71455318 | -5.96986831 |
| H | 0.44269508 | 0.64986930  | -5.36660103 |
| H | 5.63940812 | -3.06099281 | 1.80216954  |
| H | 5.33155211 | -0.69657032 | 2.40543682  |
| H | 2.95983689 | -5.47757880 | -3.96971996 |
| H | 4.28214631 | -5.84175591 | -1.86758467 |
| H | 1.79995689 | 3.43063241  | -1.69684683 |

|   |             |             |             |
|---|-------------|-------------|-------------|
| H | 3.12226632  | 3.06645530  | 0.40528846  |
| H | 1.68378973  | -3.98632484 | -5.45197005 |
| H | 5.25033746  | -4.96858739 | 0.21793271  |
| H | 0.83176574  | 2.55746389  | -3.78236420 |
| H | 4.39831347  | 1.57520133  | 1.88753856  |
| C | -3.07518970 | 4.35411105  | 4.52066441  |
| C | -0.94135682 | 3.59177313  | 6.23273848  |
| C | -1.89521679 | 5.14196292  | 4.57857326  |
| C | -3.18824617 | 3.18509022  | 5.31879260  |
| C | -0.82830035 | 4.76079396  | 5.43461029  |
| C | -2.12132973 | 2.80392126  | 6.17482963  |
| C | -4.14210614 | 4.73528001  | 3.66462737  |
| C | -1.78216032 | 6.31098375  | 3.78044507  |
| C | -4.36821908 | 2.39723834  | 5.26088375  |
| C | 0.12555963  | 3.21060417  | 7.08877552  |
| C | 0.35167256  | 5.54864583  | 5.49251914  |
| C | -2.23438619 | 1.63490042  | 6.97295782  |
| C | -2.84907676 | 6.69215271  | 2.92440803  |
| C | -5.43513552 | 2.77840730  | 4.40484671  |
| C | 1.41858900  | 5.16747687  | 6.34855618  |
| C | -1.16746975 | 1.25373146  | 7.82899486  |
| C | -4.02904972 | 5.90430086  | 2.86649915  |
| C | -5.32207910 | 3.94742815  | 3.60671849  |
| C | 1.30553258  | 3.99845603  | 7.14668440  |
| C | 0.01250320  | 2.04158332  | 7.88690374  |
| C | -0.60218754 | 7.09883544  | 3.83835399  |
| C | -4.48127542 | 1.22821770  | 6.05901186  |

|   |             |             |            |
|---|-------------|-------------|------------|
| C | 0.46472890  | 6.71766648  | 4.69439103 |
| C | -3.41435898 | 0.84704874  | 6.91504890 |
| H | -4.84802075 | 6.19688828  | 2.20940033 |
| H | -6.14105013 | 4.24001558  | 2.94961967 |
| H | 2.12450361  | 3.70586860  | 7.80378322 |
| H | 0.83147424  | 1.74899589  | 8.54400256 |
| H | -0.51540473 | 7.99618250  | 3.22570625 |
| H | 1.37048283  | 7.32242608  | 4.73884218 |
| H | -5.38702935 | 0.62345810  | 6.01456072 |
| H | -3.50114179 | -0.05029832 | 7.52769664 |
| H | -2.76229413 | 7.58949960  | 2.31176033 |
| H | 2.32434285  | 5.77223627  | 6.39300744 |
| H | -6.34088937 | 2.17364790  | 4.36039545 |
| H | -1.25425239 | 0.35638458  | 8.44164256 |
| C | 0.15765985  | 1.77716657  | 3.38171666 |
| C | 2.38698382  | 3.52072923  | 3.14570094 |
| C | 1.33609725  | 1.52873119  | 4.13402328 |
| C | 0.09388444  | 2.89738329  | 2.51140219 |
| C | 2.45075923  | 2.40051252  | 4.01601541 |
| C | 1.20854642  | 3.76916462  | 2.39339432 |
| C | -0.95700213 | 0.90538524  | 3.49972453 |
| C | 1.39987266  | 0.40851447  | 5.00433775 |
| C | -1.08455296 | 3.14581867  | 1.75909557 |
| C | 3.50164580  | 4.39251056  | 3.02769308 |
| C | 3.62919663  | 2.15207713  | 4.76832203 |
| C | 1.14477101  | 4.88938133  | 1.52307985 |
| C | 0.28521068  | -0.46326685 | 5.12234562 |

|   |             |             |             |
|---|-------------|-------------|-------------|
| C | -2.19921494 | 2.27403734  | 1.87710344  |
| C | 4.74385861  | 3.02385846  | 4.65031417  |
| C | 2.25943299  | 5.76116266  | 1.40507199  |
| C | -0.89322677 | -0.21483151 | 4.37003901  |
| C | -2.13543957 | 1.15382059  | 2.74741792  |
| C | 4.68008324  | 4.14407521  | 3.77999968  |
| C | 3.43787043  | 5.51272731  | 2.15737859  |
| C | 2.57830993  | 0.16007922  | 5.75664421  |
| C | -1.14832825 | 4.26603525  | 0.88878126  |
| C | 3.69297192  | 1.03186055  | 5.63863635  |
| C | -0.03366627 | 5.13781658  | 0.77077339  |
| H | -1.74884754 | -0.88401573 | 4.46062250  |
| H | -2.99106035 | 0.48463636  | 2.83800141  |
| H | 5.53570402  | 4.81325944  | 3.68941619  |
| H | 4.29349121  | 6.18191154  | 2.06679510  |
| H | 2.62726432  | -0.69980551 | 6.42470257  |
| H | 4.59754718  | 0.84116012  | 6.21611120  |
| H | -2.05290351 | 4.45673569  | 0.31130640  |
| H | -0.08262065 | 5.99770132  | 0.10271503  |
| H | 0.33416490  | -1.32315149 | 5.79040383  |
| H | 5.64843379  | 2.83315820  | 5.22778886  |
| H | -3.10379012 | 2.46473761  | 1.29962874  |
| H | 2.21047877  | 6.62104730  | 0.73701378  |
| C | -2.35572908 | -5.40839128 | -2.35681195 |
| C | -4.04726052 | -5.36268131 | -0.07597187 |
| C | -3.52357724 | -4.60059945 | -2.35504775 |
| C | -2.03364664 | -6.19332812 | -1.21815610 |

|   |             |             |             |
|---|-------------|-------------|-------------|
| C | -4.36934296 | -4.57774447 | -1.21462771 |
| C | -2.87941236 | -6.17047313 | -0.07773606 |
| C | -1.50996335 | -5.43124626 | -3.49723199 |
| C | -3.84565968 | -3.81566262 | -3.49370360 |
| C | -0.86579847 | -7.00111994 | -1.21992029 |
| C | -4.89302625 | -5.33982632 | 1.06444817  |
| C | -5.53719113 | -3.76995265 | -1.21286352 |
| C | -2.55732992 | -6.95540997 | 1.06091979  |
| C | -2.99989396 | -3.83851760 | -4.63412364 |
| C | -0.02003275 | -7.02397493 | -2.36034033 |
| C | -6.38295685 | -3.74709766 | -0.07244348 |
| C | -3.40309564 | -6.93255499 | 2.20133983  |
| C | -1.83204576 | -4.64630943 | -4.63588788 |
| C | -0.34211515 | -6.23903809 | -3.49899623 |
| C | -6.06087445 | -4.53203450 | 1.06621241  |
| C | -4.57094384 | -6.12476316 | 2.20310407  |
| C | -5.01350770 | -3.00787095 | -3.49193930 |
| C | -0.54371618 | -7.78605662 | -0.08126456 |
| C | -5.85927342 | -2.98501596 | -2.35151926 |
| C | -1.38948190 | -7.76320164 | 1.05915548  |
| H | -1.18283125 | -4.66385304 | -5.51128069 |
| H | 0.30709935  | -6.25658170 | -4.37438903 |
| H | -6.71008895 | -4.51449088 | 1.94160522  |
| H | -5.22015835 | -6.10721955 | 3.07849687  |
| H | -5.26074003 | -2.40534895 | -4.36597801 |
| H | -6.75572033 | -2.36495034 | -2.35016507 |
| H | 0.35273073  | -8.40612224 | -0.08261874 |



|   |             |             |             |
|---|-------------|-------------|-------------|
| H | -1.14224957 | -8.36572364 | 1.93319420  |
| H | -3.24712611 | -3.23599576 | -5.50816229 |
| H | -7.27940365 | -3.12703220 | -0.07108914 |
| H | 0.87641405  | -7.64404039 | -2.36169468 |
| H | -3.15586349 | -7.53507683 | 3.07537848  |
| C | -3.71077777 | -1.54902875 | 1.22251817  |
| C | -1.58236029 | -3.33151105 | 1.82101242  |
| C | -3.64328072 | -2.17177349 | 2.49689378  |
| C | -2.71406608 | -1.81752515 | 0.24738968  |
| C | -2.57907198 | -3.06301464 | 2.79614091  |
| C | -1.64985734 | -2.70876630 | 0.54663681  |
| C | -4.77498652 | -0.65778760 | 0.92327104  |
| C | -4.63999241 | -1.90327709 | 3.47202227  |
| C | -2.78156314 | -1.19478041 | -1.02698593 |
| C | -0.51815154 | -4.22275219 | 2.12025955  |
| C | -2.51157492 | -3.68575939 | 4.07051653  |
| C | -0.65314565 | -2.97726270 | -0.42849168 |
| C | -5.70420115 | -1.01203594 | 3.17277514  |
| C | -3.84577188 | -0.30353926 | -1.32623306 |
| C | -1.44736618 | -4.57700054 | 4.36976365  |
| C | 0.41106309  | -3.86850385 | -0.12924455 |
| C | -5.77169825 | -0.38929116 | 1.89839952  |
| C | -4.84248362 | -0.03504281 | -0.35110458 |
| C | -0.45065445 | -4.84549698 | 3.39463518  |
| C | 0.47856019  | -4.49124864 | 1.14513108  |
| C | -4.57249526 | -2.52602180 | 4.74639767  |
| C | -1.78485154 | -1.46327684 | -2.00211420 |

|   |             |             |             |
|---|-------------|-------------|-------------|
| C | -3.50828652 | -3.41726295 | 5.04564479  |
| C | -0.72064280 | -2.35451799 | -1.70286707 |
| H | -6.58859084 | 0.29483054  | 1.66869575  |
| H | -5.65937620 | 0.64907888  | -0.58080835 |
| H | 0.36623814  | -5.52961867 | 3.62433895  |
| H | 1.29545278  | -5.17537033 | 1.37483485  |
| H | -5.33757683 | -2.31992244 | 5.49491187  |
| H | -3.45647541 | -3.89528536 | 6.02386279  |
| H | -1.83666265 | -0.98525443 | -2.98033220 |
| H | 0.04443877  | -2.56061735 | -2.45138127 |
| H | -6.46928268 | -0.80593651 | 3.92128912  |
| H | -1.39555494 | -5.05502295 | 5.34798144  |
| H | -3.89758312 | 0.17448316  | -2.30445085 |
| H | 1.17614461  | -4.07460328 | -0.87775852 |
| C | -5.45526251 | 1.37317154  | -4.41416002 |
| C | -4.32825524 | 3.52094447  | -2.93682269 |
| C | -6.15086123 | 1.90956700  | -3.29844392 |
| C | -4.19616016 | 1.91066255  | -4.79120745 |
| C | -5.58735759 | 2.98345347  | -2.55977525 |
| C | -3.63265653 | 2.98454901  | -4.05253879 |
| C | -6.01876615 | 0.29928508  | -5.15282868 |
| C | -7.40996358 | 1.37207599  | -2.92139648 |
| C | -3.50056145 | 1.37426709  | -5.90692355 |
| C | -3.76475161 | 4.59483094  | -2.19815403 |
| C | -6.28295631 | 3.51984892  | -1.44405915 |
| C | -2.37355418 | 3.52204002  | -4.42958623 |
| C | -7.97346721 | 0.29818953  | -3.66006514 |

|    |             |             |             |
|----|-------------|-------------|-------------|
| C  | -4.06406508 | 0.30038063  | -6.64559222 |
| C  | -5.71945268 | 4.59373539  | -0.70539049 |
| C  | -1.81005055 | 4.59592648  | -3.69091756 |
| C  | -7.27786852 | -0.23820597 | -4.77578127 |
| C  | -5.32316745 | -0.23711043 | -6.26854481 |
| C  | -4.46035030 | 5.13122644  | -1.08243790 |
| C  | -2.50564924 | 5.13232199  | -2.57520143 |
| C  | -8.10556210 | 1.90847145  | -1.80568053 |
| C  | -2.24145929 | 1.91175810  | -6.28397084 |
| C  | -7.54205847 | 2.98235792  | -1.06701186 |
| C  | -1.67795565 | 2.98564456  | -5.54530218 |
| H  | -7.71041706 | -1.06252723 | -5.34278748 |
| H  | -5.75571600 | -1.06143169 | -6.83555101 |
| H  | -4.02780176 | 5.95554770  | -0.51543169 |
| H  | -2.07310070 | 5.95664325  | -2.00819523 |
| H  | -9.07205625 | 1.49589030  | -1.51625675 |
| H  | -8.07600403 | 3.39409812  | -0.21058182 |
| H  | -1.70751373 | 1.50001789  | -7.14040088 |
| H  | -0.71146151 | 3.39822571  | -5.83472596 |
| H  | -8.93996119 | -0.11439166 | -3.37064154 |
| H  | -6.25339802 | 5.00547563  | 0.15103944  |
| H  | -3.53011974 | -0.11135962 | -7.50202214 |
| H  | -0.84355657 | 5.00850768  | -3.98034116 |
| Cs | 0.20465800  | 0.10074000  | 0.48149700  |

217

n = 6, Energy = -598.663356527008 (35.5)

|   |             |             |             |
|---|-------------|-------------|-------------|
| C | -2.99093539 | -3.64269496 | -4.06800038 |
|---|-------------|-------------|-------------|

|   |             |             |             |
|---|-------------|-------------|-------------|
| C | -3.86143096 | -1.01459250 | -4.70117843 |
| C | -2.11804125 | -2.74896228 | -4.74305431 |
| C | -4.29907731 | -3.22237640 | -3.70953548 |
| C | -2.55328904 | -1.43491105 | -5.05964333 |
| C | -4.73432510 | -1.90832517 | -4.02612450 |
| C | -2.55568760 | -4.95674618 | -3.75141136 |
| C | -0.80989932 | -3.16928084 | -5.10151921 |
| C | -5.17197145 | -4.11610908 | -3.03448155 |
| C | -4.29667875 | 0.29945873  | -5.01776746 |
| C | -1.68039490 | -0.54117838 | -5.73469726 |
| C | -6.04246703 | -1.48800662 | -3.66765960 |
| C | -0.37465153 | -4.48333207 | -4.78493019 |
| C | -4.73672367 | -5.43016030 | -2.71789253 |
| C | -2.11564268 | 0.77287285  | -6.05128629 |
| C | -6.47771482 | -0.17395539 | -3.98424862 |
| C | -1.24754565 | -5.37706479 | -4.10987625 |
| C | -3.42858172 | -5.85047891 | -3.07635742 |
| C | -3.42378463 | 1.19319146  | -5.69282140 |
| C | -5.60482070 | 0.71977734  | -4.65930256 |
| C | 0.06299461  | -2.27554821 | -5.77657304 |
| C | -6.48011317 | -3.69579048 | -2.67601675 |
| C | -0.37225318 | -0.96149698 | -6.09316207 |
| C | -6.91536096 | -2.38173925 | -2.99260577 |
| H | -0.91344702 | -6.38573787 | -3.86686074 |
| H | -3.09448308 | -6.85915199 | -2.83334191 |
| H | -3.75788327 | 2.20186453  | -5.93583690 |
| H | -5.93891933 | 1.72845042  | -4.90231807 |

|   |             |             |             |
|---|-------------|-------------|-------------|
| H | 1.06713182  | -2.59818711 | -6.05173275 |
| H | 0.29778535  | -0.27546270 | -6.61133731 |
| H | -7.15015170 | -4.38182476 | -2.15784150 |
| H | -7.91949817 | -2.05910034 | -2.71744606 |
| H | 0.62948548  | -4.80597107 | -5.06008979 |
| H | -1.44560438 | 1.45890714  | -6.56946145 |
| H | -5.40676197 | -6.11619460 | -2.19971737 |
| H | -7.48185183 | 0.14868361  | -3.70908902 |
| C | -5.11581679 | -2.53666562 | 0.48831266  |
| C | -4.49822549 | -0.05083728 | -0.73840570 |
| C | -3.86487283 | -2.35564434 | -0.15881220 |
| C | -6.05796510 | -1.47477273 | 0.52207833  |
| C | -3.55607718 | -1.11273017 | -0.77217138 |
| C | -5.74916945 | -0.23185855 | -0.09128085 |
| C | -5.42461244 | -3.77957979 | 1.10167184  |
| C | -2.92272452 | -3.41753724 | -0.19257788 |
| C | -7.30890906 | -1.65579401 | 1.16920319  |
| C | -4.18942983 | 1.19207690  | -1.35176488 |
| C | -2.30513322 | -0.93170889 | -1.41929624 |
| C | -6.69131775 | 0.83003434  | -0.05751517 |
| C | -3.23152017 | -4.66045141 | 0.42078130  |
| C | -7.61770471 | -2.89870818 | 1.78256237  |
| C | -1.99633756 | 0.31120528  | -2.03265542 |
| C | -6.38252210 | 2.07294851  | -0.67087435 |
| C | -4.48246414 | -4.84147274 | 1.06790618  |
| C | -6.67555641 | -3.96060112 | 1.74879672  |
| C | -2.93848586 | 1.37309823  | -1.99888977 |

|   |             |             |             |
|---|-------------|-------------|-------------|
| C | -5.13157813 | 2.25396984  | -1.31799923 |
| C | -1.67178077 | -3.23651588 | -0.83970267 |
| C | -8.25105715 | -0.59390120 | 1.20296880  |
| C | -1.36298512 | -1.99360170 | -1.45306185 |
| C | -7.94226150 | 0.64901298  | 0.58960962  |
| H | -4.71949741 | -5.79554062 | 1.53872412  |
| H | -6.91258968 | -4.91466900 | 2.21961466  |
| H | -2.70145259 | 2.32716610  | -2.46970770 |
| H | -4.89454486 | 3.20803772  | -1.78881717 |
| H | -0.94858234 | -4.05163091 | -0.86562141 |
| H | -0.40275340 | -1.85464875 | -1.94979858 |
| H | -9.21128888 | -0.73285414 | 1.69970553  |
| H | -8.66545993 | 1.46412801  | 0.61552836  |
| H | -2.50832197 | -5.47556641 | 0.39486266  |
| H | -1.03610604 | 0.45015836  | -2.52939210 |
| H | -8.57793623 | -3.03766126 | 2.27929906  |
| H | -7.10572031 | 2.88806351  | -0.64495570 |
| C | 6.29596276  | -1.33717395 | -2.55887062 |
| C | 4.99635975  | 0.35262027  | -4.43536389 |
| C | 6.36389238  | 0.07339244  | -2.41025002 |
| C | 5.57823164  | -1.90284324 | -3.64573785 |
| C | 5.71409087  | 0.91828955  | -3.34849666 |
| C | 4.92843014  | -1.05794613 | -4.58398448 |
| C | 6.94576427  | -2.18207107 | -1.62062398 |
| C | 7.08162349  | 0.63906173  | -1.32338279 |
| C | 5.51030203  | -3.31340964 | -3.79435844 |
| C | 4.34655824  | 1.19751738  | -5.37361053 |

|   |            |             |             |
|---|------------|-------------|-------------|
| C | 5.78202048 | 2.32885595  | -3.19987607 |
| C | 4.21069902 | -1.62361542 | -5.67085171 |
| C | 7.73142500 | -0.20583538 | -0.38513616 |
| C | 6.16010353 | -4.15830675 | -2.85611180 |
| C | 5.13221898 | 3.17375306  | -4.13812271 |
| C | 3.56089751 | -0.77871831 | -6.60909835 |
| C | 7.66349541 | -1.61640181 | -0.53375671 |
| C | 6.87783468 | -3.59263750 | -1.76924453 |
| C | 4.41448783 | 2.60808381  | -5.22498998 |
| C | 3.62882710 | 0.63184813  | -6.46047780 |
| C | 7.14955303 | 2.04962794  | -1.17476232 |
| C | 4.79257098 | -3.87907873 | -4.88122555 |
| C | 6.49975153 | 2.89452505  | -2.11300896 |
| C | 4.14276948 | -3.03418162 | -5.81947218 |
| H | 8.16228669 | -2.26494957 | 0.18644666  |
| H | 7.37662595 | -4.24118525 | -1.04904116 |
| H | 3.91569656 | 3.25663156  | -5.94519335 |
| H | 3.13003583 | 1.28039588  | -7.18068117 |
| H | 7.70048753 | 2.48383893  | -0.34047684 |
| H | 6.55189470 | 3.97728386  | -1.99892693 |
| H | 4.74042781 | -4.96183755 | -4.99530758 |
| H | 3.59183498 | -3.46839261 | -6.65375766 |
| H | 8.28235945 | 0.22837538  | 0.44914924  |
| H | 5.18436205 | 4.25651172  | -4.02404084 |
| H | 6.10796047 | -5.24106541 | -2.97019367 |
| H | 3.00996306 | -1.21292907 | -7.44338375 |
| C | 3.10413308 | -0.42251695 | -0.92030735 |

|   |            |             |             |
|---|------------|-------------|-------------|
| C | 4.52917143 | 0.72828420  | 1.25006633  |
| C | 3.75342424 | -1.25888387 | 0.02590164  |
| C | 3.16736110 | 0.98925054  | -0.78132950 |
| C | 4.46594341 | -0.68348329 | 1.11108848  |
| C | 3.87988028 | 1.56465111  | 0.30385734  |
| C | 2.39161391 | -0.99791753 | -2.00549419 |
| C | 3.69019622 | -2.67065136 | -0.11307621 |
| C | 2.51806995 | 1.82561745  | -1.72753850 |
| C | 5.24169060 | 1.30368478  | 2.33525317  |
| C | 5.11523456 | -1.51985021 | 2.05729747  |
| C | 3.94310830 | 2.97641861  | 0.44283519  |
| C | 2.97767704 | -3.24605194 | -1.19826305 |
| C | 1.80555077 | 1.25021688  | -2.81272534 |
| C | 5.82775374 | -0.94444963 | 3.14248431  |
| C | 4.65562747 | 3.55181918  | 1.52802203  |
| C | 2.32838586 | -2.40968505 | -2.14447209 |
| C | 1.74232272 | -0.16155064 | -2.95170323 |
| C | 5.89098179 | 0.46731789  | 3.28146221  |
| C | 5.30491865 | 2.71545229  | 2.47423107  |
| C | 4.33948731 | -3.50701806 | 0.83313270  |
| C | 2.58129802 | 3.23738473  | -1.58856057 |
| C | 5.05200649 | -2.93161748 | 1.91831955  |
| C | 3.29381720 | 3.81278530  | -0.50337373 |
| H | 1.78145215 | -2.85136575 | -2.97746758 |
| H | 1.19538902 | -0.60323134 | -3.78469872 |
| H | 6.43791549 | 0.90899859  | 4.11445770  |
| H | 5.85185236 | 3.15713300  | 3.30722656  |



|   |             |             |             |
|---|-------------|-------------|-------------|
| H | 4.29095314  | -4.59069884 | 0.72645253  |
| H | 5.55040608  | -3.57361751 | 2.64463495  |
| H | 2.08289844  | 3.87938476  | -2.31487598 |
| H | 3.34235138  | 4.89646609  | -0.39669355 |
| H | 2.92914278  | -4.32973253 | -1.30494335 |
| H | 6.32615330  | -1.58644942 | 3.86879969  |
| H | 1.30715121  | 1.89221666  | -3.53904071 |
| H | 4.70416173  | 4.63549977  | 1.63470233  |
| C | 0.24485231  | 0.24526875  | 7.24053555  |
| C | 1.46302261  | 2.70584287  | 6.51442563  |
| C | 1.65972486  | 0.34376596  | 7.17100825  |
| C | -0.56093509 | 1.37705860  | 6.94700789  |
| C | 2.26881001  | 1.57405302  | 6.80795329  |
| C | 0.04815007  | 2.60734566  | 6.58395293  |
| C | -0.36423285 | -0.98501831 | 7.60359051  |
| C | 2.46551225  | -0.78802389 | 7.46453591  |
| C | -1.97580764 | 1.27856139  | 7.01653518  |
| C | 2.07210777  | 3.93612993  | 6.15137067  |
| C | 3.68368256  | 1.67255023  | 6.73842600  |
| C | -0.75763733 | 3.73913551  | 6.29042527  |
| C | 1.85642710  | -2.01831095 | 7.82759087  |
| C | -2.58489279 | 0.04827433  | 7.37959014  |
| C | 4.29276771  | 2.90283729  | 6.37537104  |
| C | -0.14855218 | 4.96942257  | 5.92737031  |
| C | 0.44155452  | -2.11680821 | 7.89711818  |
| C | -1.77910542 | -1.08351557 | 7.67311782  |
| C | 3.48698034  | 4.03462720  | 6.08184336  |

|   |             |             |            |
|---|-------------|-------------|------------|
| C | 1.26632040  | 5.06791983  | 5.85784300 |
| C | 3.88038459  | -0.68952657 | 7.39500859 |
| C | -2.78159482 | 2.41035114  | 6.72300754 |
| C | 4.48946974  | 0.54076049  | 7.03195364 |
| C | -2.17250966 | 3.64063820  | 6.35995259 |
| H | -0.02598265 | -3.06118344 | 8.17580120 |
| H | -2.24664260 | -2.02789080 | 7.95180084 |
| H | 3.95451752  | 4.97900243  | 5.80316034 |
| H | 1.73385757  | 6.01229507  | 5.57915998 |
| H | 4.49891160  | -1.55829491 | 7.62032210 |
| H | 5.57553398  | 0.61636749  | 6.97858409 |
| H | -3.86765906 | 2.33474414  | 6.77637709 |
| H | -2.79103668 | 4.50940653  | 6.13463908 |
| H | 2.47495387  | -2.88707923 | 8.05290437 |
| H | 5.37883176  | 2.97844445  | 6.32200146 |
| H | -3.67095684 | -0.02733283 | 7.43295972 |
| H | -0.76707895 | 5.83819085  | 5.70205681 |
| C | -2.15621873 | -1.15934971 | 3.92648905 |
| C | -1.17056036 | 1.42093460  | 3.26602713 |
| C | -3.06259181 | -0.11023187 | 3.61950422 |
| C | -0.75701647 | -0.91832539 | 3.90324292 |
| C | -2.56976262 | 1.17991028  | 3.28927326 |
| C | -0.26418728 | 0.37181677  | 3.57301196 |
| C | -2.64904792 | -2.44949187 | 4.25672001 |
| C | -4.46179407 | -0.35125619 | 3.64275034 |
| C | 0.14935661  | -1.96744323 | 4.21022775 |
| C | -0.67773117 | 2.71107676  | 2.93579617 |

|    |             |             |            |
|----|-------------|-------------|------------|
| C  | -3.47613570 | 2.22902812  | 2.98228843 |
| C  | 1.13501498  | 0.61284109  | 3.54976583 |
| C  | -4.95462326 | -1.64139835 | 3.97298130 |
| C  | -0.34347258 | -3.25758539 | 4.54045871 |
| C  | -2.98330651 | 3.51917028  | 2.65205747 |
| C  | 1.62784416  | 1.90298324  | 3.21953488 |
| C  | -4.04825020 | -2.69051624 | 4.27996615 |
| C  | -1.74267486 | -3.49860976 | 4.56370485 |
| C  | -1.58410423 | 3.76019465  | 2.62881133 |
| C  | 0.72147111  | 2.95210114  | 2.91255003 |
| C  | -5.36816692 | 0.69786156  | 3.33576554 |
| C  | 1.54855865  | -1.72641883 | 4.18698160 |
| C  | -4.87533774 | 1.98800372  | 3.00553458 |
| C  | 2.04138783  | -0.43627667 | 3.85675064 |
| H  | -4.42654864 | -3.68083658 | 4.53345328 |
| H  | -2.12097330 | -4.48893010 | 4.81719198 |
| H  | -1.20580579 | 4.75051499  | 2.37532420 |
| H  | 1.09976955  | 3.94242148  | 2.65906290 |
| H  | -6.44220256 | 0.51284994  | 3.35360940 |
| H  | -5.57107490 | 2.79331254  | 2.76989128 |
| H  | 2.24429581  | -2.53172765 | 4.42262490 |
| H  | 3.11542347  | -0.25126505 | 3.83890678 |
| H  | -6.02865869 | -1.82641011 | 3.99082520 |
| H  | -3.67904343 | 4.32447908  | 2.41641418 |
| H  | 0.35226434  | -4.06289418 | 4.77610200 |
| H  | 2.70187960  | 2.08799500  | 3.20169098 |
| Cs | 0.20465800  | 0.10074000  | 0.48149700 |

n = 6, Energy = -580.697898893270 (53.5)

|   |             |             |             |
|---|-------------|-------------|-------------|
| C | 2.46549680  | -6.10555134 | -0.01188030 |
| C | 0.47986784  | -6.15716382 | -2.04171116 |
| C | 1.11950601  | -6.41386521 | 0.31925628  |
| C | 2.81867311  | -5.82304371 | -1.35793231 |
| C | 0.12669153  | -6.43967145 | -0.69565915 |
| C | 1.82585863  | -5.84884995 | -2.37284774 |
| C | 3.45831128  | -6.07974511 | 1.00303512  |
| C | 0.76632970  | -6.69637285 | 1.66530828  |
| C | 4.16466389  | -5.51472984 | -1.68906889 |
| C | -0.51294664 | -6.18297005 | -3.05662659 |
| C | -1.21929926 | -6.74798532 | -0.36452257 |
| C | 2.17903494  | -5.56634231 | -3.71889975 |
| C | 1.75914418  | -6.67056661 | 2.68022371  |
| C | 5.15747837  | -5.48892360 | -0.67415346 |
| C | -2.21211373 | -6.77379156 | -1.37943800 |
| C | 1.18622046  | -5.59214855 | -4.73381518 |
| C | 3.10513501  | -6.36225274 | 2.34908718  |
| C | 4.80430211  | -5.77143123 | 0.67189859  |
| C | -1.85893747 | -6.49128392 | -2.72549005 |
| C | -0.15977037 | -5.90046242 | -4.40267864 |
| C | -0.57966092 | -7.00468666 | 1.99644470  |
| C | 4.51784004  | -5.23222226 | -3.03512074 |
| C | -1.57247540 | -7.03049289 | 0.98152927  |
| C | 3.52502556  | -5.25802850 | -4.05003617 |
| H | 3.86722496  | -6.34244373 | 3.12814194  |

|   |             |             |             |
|---|-------------|-------------|-------------|
| H | 5.56639206  | -5.75162222 | 1.45095335  |
| H | -2.62102742 | -6.51109294 | -3.50454481 |
| H | -0.92186032 | -5.92027143 | -5.18173340 |
| H | -0.85076109 | -7.22154113 | 3.02968190  |
| H | -2.60566560 | -7.26715638 | 1.23571162  |
| H | 5.55103024  | -4.99555878 | -3.28930308 |
| H | 3.79612573  | -5.04117403 | -5.08327336 |
| H | 1.48804422  | -6.88742102 | 3.71346079  |
| H | -3.24530381 | -7.01045499 | -1.12525586 |
| H | 6.19066845  | -5.25226017 | -0.92833560 |
| H | 1.45732042  | -5.37529414 | -5.76705225 |
| C | 3.69733030  | 1.86421257  | 3.22879526  |
| C | 2.90725288  | 0.65989398  | 5.67644596  |
| C | 2.32029923  | 1.77311159  | 3.56328912  |
| C | 4.67932265  | 1.35315426  | 4.11812675  |
| C | 1.92526053  | 1.17095229  | 4.78711447  |
| C | 4.28428394  | 0.75099497  | 5.34195210  |
| C | 4.09236900  | 2.46637187  | 2.00496991  |
| C | 1.33830688  | 2.28416989  | 2.67395763  |
| C | 6.05635371  | 1.44425525  | 3.78363289  |
| C | 2.51221418  | 0.05773469  | 6.90027130  |
| C | 0.54822947  | 1.07985131  | 5.12160832  |
| C | 5.26627630  | 0.23993666  | 6.23128359  |
| C | 1.73334559  | 2.88632919  | 1.45013228  |
| C | 6.45139242  | 2.04641454  | 2.55980754  |
| C | 0.15319076  | 0.47769201  | 6.34543367  |
| C | 4.87123759  | -0.36222263 | 7.45510893  |

|   |             |             |             |
|---|-------------|-------------|-------------|
| C | 3.11037667  | 2.97743020  | 1.11563837  |
| C | 5.46940008  | 2.55747288  | 1.67047600  |
| C | 1.13518310  | -0.03336632 | 7.23476521  |
| C | 3.49420651  | -0.45332364 | 7.78960284  |
| C | -0.03872395 | 2.19306887  | 3.00845154  |
| C | 7.03834584  | 0.93319698  | 4.67296433  |
| C | -0.43376266 | 1.59090957  | 4.23227689  |
| C | 6.64330713  | 0.33103769  | 5.89678967  |
| H | 3.41361059  | 3.43965104  | 0.17622318  |
| H | 5.77263400  | 3.01969372  | 0.73106081  |
| H | 0.83194917  | -0.49558716 | 8.17418040  |
| H | 3.19097259  | -0.91554449 | 8.72901803  |
| H | -0.79250690 | 2.58536013  | 2.32579563  |
| H | -1.49077956 | 1.52097994  | 4.48903627  |
| H | 8.09536274  | 1.00312661  | 4.41620495  |
| H | 7.39709008  | -0.06125358 | 6.57944559  |
| H | 0.97956289  | 3.27862044  | 0.76747637  |
| H | -0.90382593 | 0.40776232  | 6.60219315  |
| H | 7.50840911  | 2.11634424  | 2.30304806  |
| H | 5.62502029  | -0.75451388 | 8.13776484  |
| C | 3.07385801  | -2.33047595 | 0.00401815  |
| C | 2.05636414  | -2.88016692 | 2.59788506  |
| C | 1.70587103  | -2.67203603 | 0.17238801  |
| C | 3.93309806  | -2.26376135 | 1.13258174  |
| C | 1.19712409  | -2.94688151 | 1.46932146  |
| C | 3.42435112  | -2.53860684 | 2.42951520  |
| C | 3.58260495  | -2.05563046 | -1.29291531 |

|   |             |             |             |
|---|-------------|-------------|-------------|
| C | 0.84663099  | -2.73875062 | -0.95617559 |
| C | 5.30108504  | -1.92220127 | 0.96421188  |
| C | 1.54761720  | -3.15501240 | 3.89481852  |
| C | -0.17086289 | -3.28844159 | 1.63769132  |
| C | 4.28359116  | -2.47189224 | 3.55807880  |
| C | 1.35537793  | -2.46390514 | -2.25310905 |
| C | 5.80983198  | -1.64735579 | -0.33272157 |
| C | -0.67960983 | -3.56328708 | 2.93462478  |
| C | 3.77484422  | -2.74673773 | 4.85501225  |
| C | 2.72336494  | -2.12234505 | -2.42147896 |
| C | 4.95059196  | -1.71407037 | -1.46128522 |
| C | 0.17963019  | -3.49657249 | 4.06318843  |
| C | 2.40685721  | -3.08829782 | 5.02338217  |
| C | -0.52135577 | -3.08031066 | -0.78780564 |
| C | 6.16032486  | -1.85548672 | 2.09277539  |
| C | -1.03010271 | -3.35515615 | 0.50912782  |
| C | 5.65157792  | -2.13033220 | 3.38970884  |
| H | 3.11388193  | -1.91137212 | -3.41701234 |
| H | 5.34110896  | -1.50309744 | -2.45681860 |
| H | -0.21088681 | -3.70754542 | 5.05872181  |
| H | 2.01634022  | -3.29927075 | 6.01891555  |
| H | -1.18091334 | -3.13152117 | -1.65409748 |
| H | -2.08017732 | -3.61733961 | 0.63836946  |
| H | 7.21039947  | -1.59330326 | 1.96353374  |
| H | 6.31113549  | -2.07912170 | 4.25600069  |
| H | 0.69582060  | -2.51511560 | -3.11940085 |
| H | -1.72968424 | -3.82547051 | 3.06386657  |

|   |             |             |             |
|---|-------------|-------------|-------------|
| H | 6.85990639  | -1.38517236 | -0.46196336 |
| H | 4.43440155  | -2.69552727 | 5.72130406  |
| C | 1.80524295  | 5.94146966  | 3.02956823  |
| C | 1.07681582  | 4.77404794  | 5.51394339  |
| C | 2.81138150  | 5.48766353  | 3.92295800  |
| C | 0.43489083  | 5.81156493  | 3.37836604  |
| C | 2.44716794  | 4.90395268  | 5.16514558  |
| C | 0.07067727  | 5.22785407  | 4.62055362  |
| C | 2.16945651  | 6.52518052  | 1.78738064  |
| C | 4.18173362  | 5.61756827  | 3.57416019  |
| C | -0.57124772 | 6.26537106  | 2.48497626  |
| C | 0.71260226  | 4.19033709  | 6.75613098  |
| C | 3.45330649  | 4.45014655  | 6.05853536  |
| C | -1.29967485 | 5.09794934  | 4.96935143  |
| C | 4.54594718  | 6.20127912  | 2.33197261  |
| C | -0.20703416 | 6.84908191  | 1.24278868  |
| C | 3.08909293  | 3.86643569  | 7.30072294  |
| C | -1.66388841 | 4.51423848  | 6.21153901  |
| C | 3.53980864  | 6.65508527  | 1.43858278  |
| C | 1.16331797  | 6.97898667  | 0.89399082  |
| C | 1.71874080  | 3.73653093  | 7.64952080  |
| C | -0.65774988 | 4.06043233  | 7.10492884  |
| C | 5.18787194  | 5.16376217  | 4.46754991  |
| C | -1.94159961 | 6.13546629  | 2.83377413  |
| C | 4.82365838  | 4.58005131  | 5.70973749  |
| C | -2.30581317 | 5.55175544  | 4.07596171  |
| H | 3.81938101  | 7.10314500  | 0.48507264  |



|   |             |              |             |
|---|-------------|--------------|-------------|
| H | 1.44289034  | 7.42704639   | -0.05951932 |
| H | 1.43916843  | 3.28847121   | 8.60303094  |
| H | -0.93732224 | 3.61237261   | 8.05843898  |
| H | 6.23976205  | 5.26347777   | 4.19981074  |
| H | 5.59597608  | 4.23170715   | 6.39550857  |
| H | -2.71391732 | 6.48381046   | 2.14800305  |
| H | -3.35770328 | 5.45203983   | 4.34370088  |
| H | 5.59783707  | 6.30099478   | 2.06423333  |
| H | 3.86141039  | 3.51809153   | 7.98649401  |
| H | -0.97935162 | 7.19742607   | 0.55701761  |
| H | -2.71577830 | 4.41452282   | 6.47927829  |
| C | 0.78288836  | -9.56081682  | -3.62834836 |
| C | 1.53541602  | -9.85209218  | -0.90539770 |
| C | -0.19292668 | -9.90132099  | -2.65457118 |
| C | 2.13496723  | -9.36595033  | -3.24065021 |
| C | 0.18333715  | -10.04695867 | -1.29309585 |
| C | 2.51123106  | -9.51158801  | -1.87917488 |
| C | 0.40662453  | -9.41517915  | -4.98982369 |
| C | -1.54500555 | -10.09618749 | -3.04226933 |
| C | 3.11078227  | -9.02544616  | -4.21442739 |
| C | 1.91167985  | -9.99772985  | 0.45607763  |
| C | -0.79247789 | -10.38746284 | -0.31931867 |
| C | 3.86330993  | -9.31672151  | -1.49147673 |
| C | -1.92126938 | -9.95054981  | -4.40374466 |
| C | 2.73451844  | -8.87980848  | -5.57590272 |
| C | -0.41621405 | -10.53310052 | 1.04215666  |
| C | 4.23957376  | -9.46235919  | -0.13000140 |

|   |             |              |             |
|---|-------------|--------------|-------------|
| C | -0.94545436 | -9.61004563  | -5.37752189 |
| C | 1.38243955  | -9.07467497  | -5.96360092 |
| C | 0.93586483  | -10.33823403 | 1.42985487  |
| C | 3.26375874  | -9.80286337  | 0.84377584  |
| C | -2.52082036 | -10.43669161 | -2.06849220 |
| C | 4.46286091  | -8.83057972  | -3.82672918 |
| C | -2.14455653 | -10.58232928 | -0.70701687 |
| C | 4.83912474  | -8.97621739  | -2.46525385 |
| H | -1.23427658 | -9.49825334  | -6.42259798 |
| H | 1.09361733  | -8.96288267  | -7.00867701 |
| H | 1.22468705  | -10.45002633 | 2.47493095  |
| H | 3.55258096  | -9.91465566  | 1.88885192  |
| H | -3.55868382 | -10.58627224 | -2.36609150 |
| H | -2.89359773 | -10.84370223 | 0.04046003  |
| H | 5.21190212  | -8.56920677  | -4.57420608 |
| H | 5.87698820  | -8.82663676  | -2.16765456 |
| H | -2.95913263 | -10.10013039 | -4.70134406 |
| H | -1.16525502 | -10.79447342 | 1.78963357  |
| H | 3.48355940  | -8.61843558  | -6.32337962 |
| H | 5.27743701  | -9.31277861  | 0.16759801  |
| C | -3.18834853 | 0.19099320   | -0.92219601 |
| C | -1.41104425 | 0.40679596   | -3.12678626 |
| C | -2.38012843 | 1.34890728   | -1.07191353 |
| C | -3.10791648 | -0.85901950  | -1.87477362 |
| C | -1.49147629 | 1.45680866   | -2.17420866 |
| C | -2.21926434 | -0.75111812  | -2.97706874 |
| C | -4.07700067 | 0.08309182   | 0.18009911  |

|   |             |             |             |
|---|-------------|-------------|-------------|
| C | -2.46056048 | 2.39891998  | -0.11933593 |
| C | -3.91613658 | -2.01693358 | -1.72505610 |
| C | -0.52239210 | 0.51469734  | -4.22908138 |
| C | -0.68325620 | 2.61472274  | -2.32392618 |
| C | -2.13883230 | -1.80113082 | -3.92964635 |
| C | -3.34921262 | 2.29101860  | 0.98295920  |
| C | -4.80478872 | -2.12483496 | -0.62276097 |
| C | 0.20539595  | 2.72262412  | -3.42622130 |
| C | -1.25018015 | -1.69322944 | -5.03194147 |
| C | -4.15743276 | 1.13310451  | 1.13267676  |
| C | -4.88522081 | -1.07482227 | 0.32981668  |
| C | 0.28582803  | 1.67261143  | -4.37879895 |
| C | -0.44196002 | -0.53531535 | -5.18165904 |
| C | -1.65234046 | 3.55683385  | -0.26905352 |
| C | -3.83570446 | -3.06694607 | -2.67763362 |
| C | -0.76368831 | 3.66473523  | -1.37134865 |
| C | -2.94705232 | -2.95904469 | -3.77992875 |
| H | -4.83956711 | 1.05027881  | 1.97880467  |
| H | -5.56735516 | -1.15764797 | 1.17594458  |
| H | 0.96796239  | 1.75543713  | -5.22492686 |
| H | 0.24017434  | -0.45248965 | -6.02778694 |
| H | -1.71408054 | 4.36282959  | 0.46215047  |
| H | -0.14329397 | 4.55355669  | -1.48627265 |
| H | -4.45609881 | -3.95576753 | -2.56270962 |
| H | -2.88531224 | -3.76504043 | -4.51113274 |
| H | -3.41095282 | 3.09701413  | 1.71416316  |
| H | 0.82579026  | 3.61144537  | -3.54114543 |

|    |             |             |             |
|----|-------------|-------------|-------------|
| H  | -5.42518304 | -3.01365621 | -0.50783684 |
| H  | -1.18843996 | -2.49922497 | -5.76314543 |
| Cs | 0.20465800  | 0.10074000  | 0.48149700  |

217

n = 6, Energy = -579.633967363686 (54.6)

|   |            |             |             |
|---|------------|-------------|-------------|
| C | 1.16382480 | -3.47791649 | -4.98520871 |
| C | 2.49942510 | -5.89064626 | -4.30660248 |
| C | 1.50546749 | -3.74417273 | -3.63288184 |
| C | 1.48998226 | -4.41802513 | -5.99823247 |
| C | 2.17326764 | -4.95053762 | -3.29357873 |
| C | 2.15778241 | -5.62439001 | -5.65892935 |
| C | 0.49602465 | -2.27155160 | -5.32451182 |
| C | 1.17931003 | -2.80406409 | -2.61985808 |
| C | 1.14833957 | -4.15176888 | -7.35055934 |
| C | 3.16722525 | -7.09701114 | -3.96729937 |
| C | 2.51491033 | -5.21679386 | -1.94125186 |
| C | 2.48393988 | -6.56449865 | -6.67195311 |
| C | 0.51150988 | -1.59769921 | -2.95916119 |
| C | 0.48053942 | -2.94540400 | -7.68986245 |
| C | 3.18271048 | -6.42315875 | -1.60194875 |
| C | 3.15174003 | -7.77086354 | -6.33265000 |
| C | 0.16986716 | -1.33144291 | -4.31148808 |
| C | 0.15438193 | -2.00529531 | -6.67683870 |
| C | 3.50886797 | -7.36326744 | -2.61497249 |
| C | 3.49338274 | -8.03711983 | -4.98032311 |
| C | 1.52095272 | -3.07032040 | -1.26753144 |
| C | 1.47449704 | -5.09187746 | -8.36358286 |

|   |             |             |             |
|---|-------------|-------------|-------------|
| C | 2.18875287  | -4.27668529 | -0.92822833 |
| C | 2.14229719  | -6.29824234 | -8.02427975 |
| H | -0.34273997 | -0.40543048 | -4.57193905 |
| H | -0.35822520 | -1.07928287 | -6.93728967 |
| H | 4.02147511  | -8.28927987 | -2.35452152 |
| H | 4.00598988  | -8.96313227 | -4.71987215 |
| H | 1.27059240  | -2.34868766 | -0.48992862 |
| H | 2.45099974  | -4.48106508 | 0.10982549  |
| H | 1.21225017  | -4.88749766 | -9.40163669 |
| H | 2.39265751  | -7.01987508 | -8.80188258 |
| H | 0.26114953  | -0.87606648 | -2.18155861 |
| H | 3.44495738  | -6.62753866 | -0.56389514 |
| H | 0.21829253  | -2.74102409 | -8.72791606 |
| H | 3.40210038  | -8.49249626 | -7.11025258 |
| C | -2.64884351 | 2.33864226  | 2.08081693  |
| C | -0.17669686 | 1.77866703  | 3.36164409  |
| C | -2.58666252 | 1.35881341  | 3.10671606  |
| C | -1.47495117 | 3.03848349  | 1.69533138  |
| C | -1.35058920 | 1.07882579  | 3.74712964  |
| C | -0.23887785 | 2.75849588  | 2.33574496  |
| C | -3.88491683 | 2.61862988  | 1.44040335  |
| C | -3.76055486 | 0.65897218  | 3.49220162  |
| C | -1.53713216 | 4.01831234  | 0.66943225  |
| C | 1.05937646  | 1.49867941  | 4.00205767  |
| C | -1.28840821 | 0.09899695  | 4.77302877  |
| C | 0.93501448  | 3.45833711  | 1.95025941  |
| C | -4.99662818 | 0.93895980  | 2.85178804  |

|   |             |             |             |
|---|-------------|-------------|-------------|
| C | -2.77320548 | 4.29829996  | 0.02901867  |
| C | -0.05233489 | -0.18099067 | 5.41344235  |
| C | 2.17108781  | 3.17834949  | 2.59067298  |
| C | -5.05880922 | 1.91878866  | 1.82588888  |
| C | -3.94709787 | 3.59845874  | 0.41450419  |
| C | 1.12155750  | 0.51885055  | 5.02795683  |
| C | 2.23326885  | 2.19852063  | 3.61657214  |
| C | -3.69837376 | -0.32085651 | 4.51810061  |
| C | -0.36323993 | 4.71815341  | 0.28394683  |
| C | -2.46230044 | -0.60084412 | 5.15851419  |
| C | 0.87283339  | 4.43816579  | 0.92436041  |
| H | -6.00762602 | 2.13370872  | 1.33430383  |
| H | -4.89591467 | 3.81337880  | -0.07708085 |
| H | 2.07037430  | 0.30393049  | 5.51954187  |
| H | 3.18208565  | 1.98360057  | 4.10815719  |
| H | -4.59946020 | -0.85805864 | 4.81400153  |
| H | -2.41456998 | -1.35296634 | 5.94600021  |
| H | -0.41097040 | 5.47027563  | -0.50353919 |
| H | 1.77391983  | 4.97536792  | 0.62845949  |
| H | -5.89771457 | 0.40175784  | 3.14768879  |
| H | -0.00460427 | -0.93311274 | 6.20092826  |
| H | -2.82093611 | 5.05042202  | -0.75846724 |
| H | 3.07217419  | 3.71555145  | 2.29477223  |
| C | 5.96625378  | 3.34437348  | 0.03379330  |
| C | 6.74333095  | 1.62154237  | -2.08601884 |
| C | 6.67786505  | 2.14828342  | 0.31553439  |
| C | 5.64318110  | 3.67904799  | -1.30785385 |

|   |            |             |             |
|---|------------|-------------|-------------|
| C | 7.06640364 | 1.28686787  | -0.74437169 |
| C | 6.03171968 | 2.81763244  | -2.36775993 |
| C | 5.57771520 | 4.20578904  | 1.09369938  |
| C | 7.00093774 | 1.81360891  | 1.65718154  |
| C | 4.93156983 | 4.87513806  | -1.58959493 |
| C | 7.13186954 | 0.76012682  | -3.14592492 |
| C | 7.77801491 | 0.09077780  | -0.46263061 |
| C | 5.70864700 | 3.15230694  | -3.70940708 |
| C | 6.61239915 | 2.67502447  | 2.71708762  |
| C | 4.54303124 | 5.73655361  | -0.52968886 |
| C | 8.16655349 | -0.77063775 | -1.52253668 |
| C | 6.09718558 | 2.29089139  | -4.76931316 |
| C | 5.90078787 | 3.87111457  | 2.43534658  |
| C | 4.86610391 | 5.40187914  | 0.81195834  |
| C | 7.84348082 | -0.43596328 | -2.86418388 |
| C | 6.80879687 | 1.09480129  | -4.48757212 |
| C | 7.71254891 | 0.61751900  | 1.93892247  |
| C | 4.60849724 | 5.20981242  | -2.93124193 |
| C | 8.10108749 | -0.24389656 | 0.87901639  |
| C | 4.99703583 | 4.34839686  | -3.99114801 |
| H | 5.60254347 | 4.53234197  | 3.24893641  |
| H | 4.56785952 | 6.06310654  | 1.62554818  |
| H | 8.14172522 | -1.09719068 | -3.67777372 |
| H | 7.10704126 | 0.43357389  | -5.30116195 |
| H | 7.96054135 | 0.36062092  | 2.96877847  |
| H | 8.64732436 | -1.16202211 | 1.09528247  |
| H | 4.06226037 | 6.12793797  | -3.14750801 |

|   |             |             |             |
|---|-------------|-------------|-------------|
| H | 4.74904338  | 4.60529494  | -5.02100401 |
| H | 6.86039148  | 2.41812658  | 3.74694351  |
| H | 8.71279028  | -1.68876319 | -1.30627080 |
| H | 3.99679446  | 6.65467905  | -0.74595474 |
| H | 5.84919326  | 2.54778928  | -5.79916905 |
| C | -1.35691224 | 4.86313928  | 5.03400800  |
| C | 1.03887647  | 6.18896128  | 4.28035558  |
| C | -0.13530512 | 4.54663643  | 5.68508563  |
| C | -1.38062500 | 5.84255312  | 4.00610416  |
| C | 1.06258923  | 5.20954744  | 5.30825942  |
| C | -0.18273064 | 6.50546412  | 3.62927795  |
| C | -2.55480660 | 4.20022827  | 5.41083421  |
| C | -0.11159236 | 3.56722259  | 6.71298947  |
| C | -2.60223211 | 6.15905596  | 3.35502653  |
| C | 2.23677083  | 6.85187228  | 3.90352937  |
| C | 2.28419635  | 4.89304460  | 5.95933705  |
| C | -0.20644340 | 7.48487797  | 2.60137411  |
| C | -1.30948672 | 2.90431159  | 7.08981568  |
| C | -3.80012647 | 5.49614496  | 3.73185273  |
| C | 3.48209071  | 5.55595560  | 5.58251085  |
| C | 0.99145096  | 8.14778897  | 2.22454790  |
| C | -2.53109389 | 3.22081440  | 6.43873806  |
| C | -3.77641376 | 4.51673109  | 4.75975659  |
| C | 3.45837800  | 6.53536947  | 4.55460699  |
| C | 2.21305812  | 7.83128616  | 2.87562552  |
| C | 1.11001463  | 3.25071987  | 7.36406694  |
| C | -2.62594475 | 7.13846968  | 2.32712285  |



|   |             |             |             |
|---|-------------|-------------|-------------|
| C | 2.30790899  | 3.91363088  | 6.98724073  |
| C | -1.42805040 | 7.80138068  | 1.95029664  |
| H | -3.45060430 | 2.71196021  | 6.72799197  |
| H | -4.69592417 | 4.00787689  | 5.04901050  |
| H | 4.37788841  | 7.04422367  | 4.26535308  |
| H | 3.13256853  | 8.34014035  | 2.58637161  |
| H | 1.12821670  | 2.49891622  | 8.15309179  |
| H | 3.24562157  | 3.67068148  | 7.48701164  |
| H | -3.56365733 | 7.38141908  | 1.82735194  |
| H | -1.44625246 | 8.55318433  | 1.16127179  |
| H | -1.29128482 | 2.15250803  | 7.87884038  |
| H | 4.41980322  | 5.31300635  | 6.08228158  |
| H | -4.73783898 | 5.73909421  | 3.23208200  |
| H | 0.97324906  | 8.89959252  | 1.43552320  |
| C | -2.30449692 | -3.77449510 | -3.11475003 |
| C | -1.54365734 | -4.27127076 | -0.42403701 |
| C | -2.55823407 | -2.79988760 | -2.11367173 |
| C | -1.67033998 | -4.99749042 | -2.77047183 |
| C | -2.17781428 | -3.04827544 | -0.76831522 |
| C | -1.28992019 | -5.24587825 | -1.42511531 |
| C | -2.68491671 | -3.52610726 | -4.46010655 |
| C | -3.19239102 | -1.57689228 | -2.45794994 |
| C | -1.41660282 | -5.97209791 | -3.77155013 |
| C | -1.16323755 | -4.51965859 | 0.92131950  |
| C | -2.43155144 | -2.07366795 | 0.23276309  |
| C | -0.65576325 | -6.46887358 | -1.08083710 |
| C | -3.57281080 | -1.32850445 | -3.80330645 |

|   |             |             |             |
|---|-------------|-------------|-------------|
| C | -1.79702261 | -5.72371008 | -5.11690664 |
| C | -2.05113165 | -2.32205578 | 1.57811960  |
| C | -0.27534346 | -6.71726141 | 0.26451941  |
| C | -3.31907367 | -2.30311193 | -4.80438481 |
| C | -2.43117957 | -4.50071475 | -5.46118491 |
| C | -1.41697469 | -3.54505111 | 1.92239786  |
| C | -0.52908059 | -5.74265393 | 1.26559777  |
| C | -3.44612808 | -0.60228500 | -1.45687170 |
| C | -0.78244597 | -7.19509302 | -3.42727186 |
| C | -3.06570829 | -0.85067283 | -0.11151519 |
| C | -0.40202618 | -7.44348086 | -2.08191534 |
| H | -3.61108603 | -2.11244804 | -5.83708800 |
| H | -2.72319193 | -4.31005086 | -6.49388810 |
| H | -1.12496233 | -3.73571500 | 2.95510105  |
| H | -0.23706824 | -5.93331782 | 2.29830096  |
| H | -3.93291057 | 0.33649319  | -1.72114160 |
| H | -3.26047839 | -0.10255855 | 0.65691822  |
| H | -0.58767587 | -7.94320731 | -4.19570526 |
| H | 0.08475631  | -8.38225905 | -1.81764544 |
| H | -4.05959322 | -0.38972646 | -4.06757647 |
| H | -2.24590164 | -1.57394172 | 2.34655299  |
| H | -1.60225262 | -6.47182414 | -5.88534004 |
| H | 0.21143896  | -7.65603940 | 0.52878943  |
| C | 4.84762319  | -2.31175055 | -2.56617249 |
| C | 3.44207943  | 0.09107031  | -3.12875421 |
| C | 4.47206048  | -1.44417849 | -1.50661057 |
| C | 4.52041401  | -1.97791218 | -3.90702527 |

|   |            |             |             |
|---|------------|-------------|-------------|
| C | 3.76928860 | -0.24276806 | -1.78790144 |
| C | 3.81764213 | -0.77650175 | -4.18831613 |
| C | 5.55039506 | -3.51316097 | -2.28488163 |
| C | 4.79926966 | -1.77801686 | -0.16575779 |
| C | 4.89597671 | -2.84548424 | -4.96658719 |
| C | 2.73930755 | 1.29248074  | -3.41004508 |
| C | 3.39372590 | 0.62480400  | -0.72833952 |
| C | 3.49043296 | -0.44266338 | -5.52916891 |
| C | 5.50204153 | -2.97942729 | 0.11553307  |
| C | 5.59874859 | -4.04689466 | -4.68529632 |
| C | 2.69095402 | 1.82621443  | -1.00963038 |
| C | 2.78766108 | 0.75874705  | -5.81045977 |
| C | 5.87760427 | -3.84699939 | -0.94402884 |
| C | 5.92595780 | -4.38073308 | -3.34444353 |
| C | 2.36374482 | 2.16005285  | -2.35048317 |
| C | 2.41209835 | 1.62631916  | -4.75089787 |
| C | 4.42370696 | -0.91044485 | 0.89380389  |
| C | 4.56876753 | -2.51164582 | -6.30743973 |
| C | 3.72093508 | 0.29096558  | 0.61251303  |
| C | 3.86599566 | -1.31023539 | -6.58873059 |
| H | 6.41705589 | -4.76920876 | -0.72810840 |
| H | 6.46540942 | -5.30294245 | -3.12852309 |
| H | 1.82429319 | 3.08226221  | -2.56640361 |
| H | 1.87264672 | 2.54852852  | -4.96681831 |
| H | 4.67487458 | -1.16670107 | 1.92305014  |
| H | 3.43265101 | 0.95691883  | 1.42583881  |
| H | 4.85705160 | -3.17759906 | -7.12076552 |

|    |            |             |             |
|----|------------|-------------|-------------|
| H  | 3.61482804 | -1.05397917 | -7.61797684 |
| H  | 5.75320919 | -3.23568361 | 1.14477910  |
| H  | 2.40266993 | 2.49216767  | -0.19630484 |
| H  | 5.88703268 | -4.71284791 | -5.49862186 |
| H  | 2.53649342 | 1.01500337  | -6.83970580 |
| Cs | 0.20465800 | 0.10074000  | 0.48149700  |
